# Supplementary material for: Elucidation of Physiological, Transcriptomic and Metabolomic Salinity Response Mechanisms in Medicago sativa
Source: MDPI journal article supplement (doi:10.3390/plants12102059), 2023-05-22
Supplement: s1 [file s1]

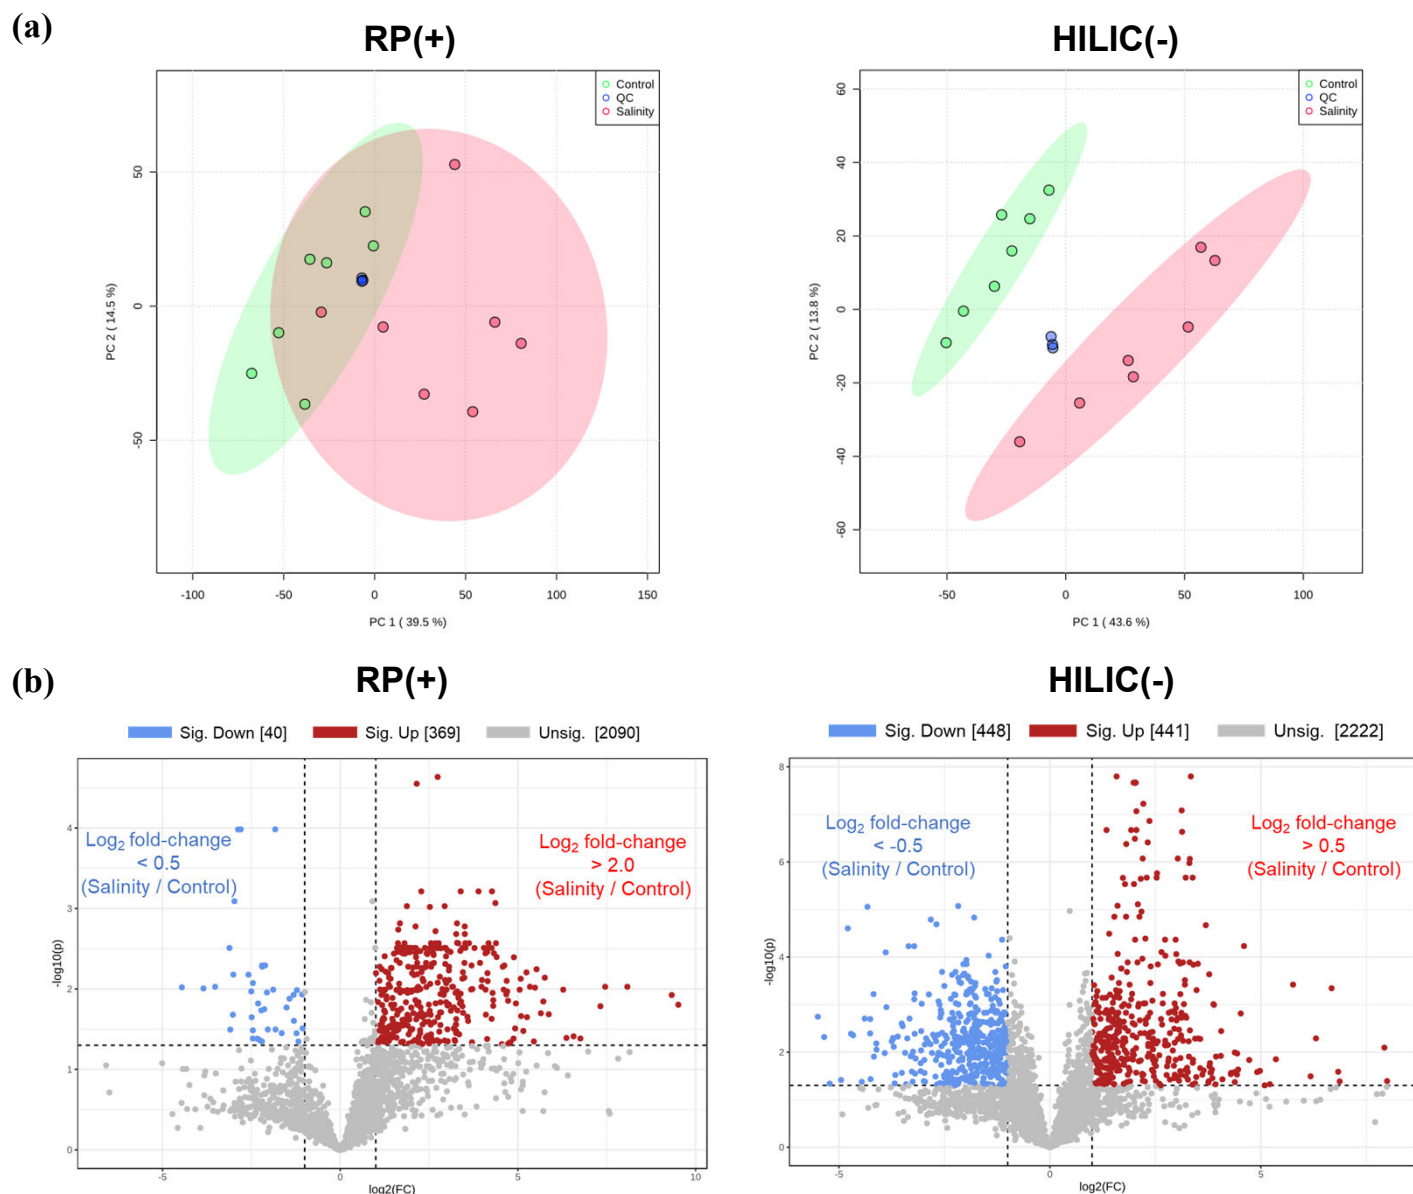

**Supplemental Figure S4.** Overview of metabolomic analysis of alfalfa leaves under control and salinity conditions. **(a)** Principal component analysis of metabolomic data. **(b)** Volcano plot of significant differentially abundant metabolites between control and salinity conditions. The x-axis indicates  $\log_2$  fold-change values and the y-axis denotes the statistical significance of the degree of change in RP (+) and HILIC (-).
