# Supplementary material for: Elucidation of Physiological, Transcriptomic and Metabolomic Salinity Response Mechanisms in Medicago sativa
Source: MDPI journal article supplement (doi:10.3390/plants12102059), 2023-05-22
Supplement: s1 [file s1]

## Metabolomic data processing

MS-DIAL parameter settings for HILIC (-) data processing

MS-DIAL parameters were optimized by *Paramounter*[3] as follows:

### Software version

MS-DIAL version 4.90

### #Project

MS1 Data type: Centroid

MS2 Data type: Centroid

Ion mode: Negative

Target: Metabolomics

Mode: ddMSMS

### #Data collection parameters

Retention time begin: 0

Retention time end: 100

Mass range begin: 0

Mass range end: 2000

MS2 mass range begin: 0

MS2 mass range end: 2000

### #Isotope recognition

Maximum charged number: 2

### Mass accuracy

MS<sup>1</sup> tolerance: 0.01 Da, MS<sup>2</sup> tolerance: 0.025 Da

### Peak detection

Minimum peak height: 364

Mass slice width: 0.01 Da

Smoothing method: Linear weighted moving average

Smoothing level: 3 scan

Minimum peak width: 3 scan

### Identification

Accurate mass tolerance (MS<sup>1</sup>): 0.01 Da

Accurate mass tolerance (MS<sup>2</sup>): 0.05 Da

Identification score cut off: 70%

The retention time is not used for scoring.

### Library

MS/MS reference library (version 15) provided by MS-DIAL, combined with NIST 20 library

### Adduct

[M-H]<sup>-</sup>

### Alignment

Retention time tolerance: 0.105 min

MS<sup>1</sup> tolerance: 0.007 Da

MS-DIAL parameter settings for RP (+) data processing, optimized by *Paramounter* as follows:

**Software version**

MS-DIAL version 4.80

**#Project**

MS1 Data type: Centroid

MS2 Data type: Centroid

Ion mode: Positive

Target: Metabolomics

Mode: ddMSMS

**#Data collection parameters**

Retention time begin: 0

Retention time end: 100

Mass range begin: 0

Mass range end: 2000

MS2 mass range begin: 0

MS2 mass range end: 2000

**#Isotope recognition**

Maximum charged number: 2

**Mass accuracy**

MS<sup>1</sup> tolerance: 0.02 Da, MS<sup>2</sup> tolerance: 0.025 Da

**Peak detection**

Minimum peak height: 442

Mass slice width: 0.02 Da

Smoothing method: Linear weighted moving average

Smoothing level: 3 scan

Minimum peak width: 3 scan

**Identification**

Accurate mass tolerance (MS<sup>1</sup>): 0.01 Da

Accurate mass tolerance (MS<sup>2</sup>): 0.05 Da

Identification score cut off: 70%

The retention time is not used for scoring.

**Library**

MS/MS reference library (version 15) provided by MS-DIAL, combined with NIST 20 library

**Adduct**

[M+H]<sup>+</sup>, [M+NH<sub>4</sub>]<sup>+</sup>, [M+Na]<sup>+</sup>

**Alignment**

Retention time tolerance: 0.154 min

MS<sup>1</sup> tolerance: 0.009 Da

### **MAFFIN processing setting**

The processing workflow of MAFFIN refers to <https://github.com/HuanLab/MAFFIN> and <https://doi.org/10.1093/bioinformatics/btac355>.

All parameters were set as default except for the blank filter cut-off, which was set as 5 for both HILIC(-) and RP(+).
