# Supplementary material for: Elucidation of Physiological, Transcriptomic and Metabolomic Salinity Response Mechanisms in Medicago sativa
Source: MDPI journal article supplement (doi:10.3390/plants12102059), 2023-05-22
Supplement: s1 [file s1]

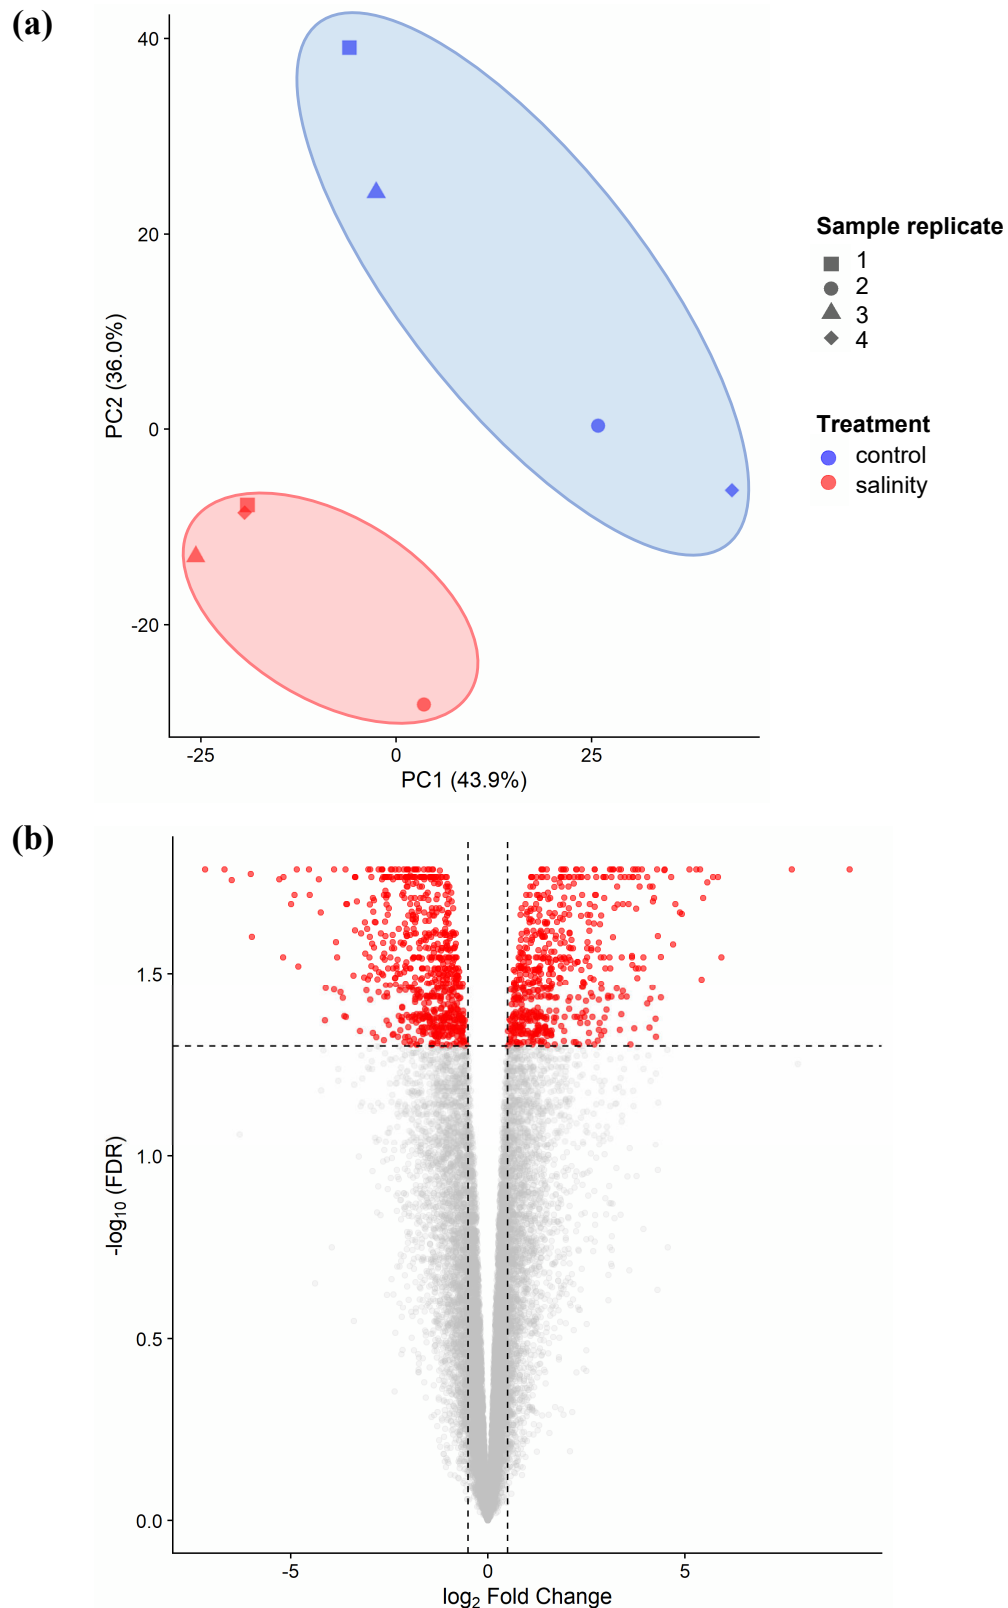

**Supplemental Figure S2.** Overview of RNA-Seq analysis of alfalfa leaves under control and salinity conditions. **(a)** Principal component analysis of RNA-Seq data. Leaf RNA from four biological replicates were assessed under each treatment (control and salinity). **(b)** Volcano plot of differentially expressed genes between control and salinity conditions. The x-axis indicates  $\log_2$  fold-change values and the y-axis indicates the statistical significance of the degree of change. Red points denote DEGs above the selected threshold for fold-change and significance. FDR, false discovery rate.
