# Supplementary material for: Elucidation of Physiological, Transcriptomic and Metabolomic Salinity Response Mechanisms in Medicago sativa
Source: MDPI journal article supplement (doi:10.3390/plants12102059), 2023-05-22
Supplement: s1 [file s1]

**Table S1.** RNA-Seq read and alignment data for alfalfa cv. Beaver leaf tissue under control and saline conditions

|     | # Raw Reads | # Mapped Reads | # of Expressed Transcripts |
|-----|-------------|----------------|----------------------------|
| C-1 | 193,486,090 | 142,603,507    | 19,168                     |
| C-2 | 231,379,036 | 160,167,048    | 19,216                     |
| C-3 | 133,009,552 | 96,692,166     | 19,181                     |
| C-4 | 170,006,848 | 116,226,568    | 19,170                     |
| S-1 | 166,539,732 | 119,238,137    | 19,223                     |
| S-2 | 187,496,544 | 131,445,620    | 19,222                     |
| S-3 | 135,077,072 | 97,396,305     | 19,210                     |
| S-4 | 126,016,842 | 90,052,470     | 19,210                     |

C, control conditions (non-saline); S, saline conditions.

**Table S2.** Primers used for qRT-PCR validation of RNA-Seq results

| Gene ID        | Description                                        | Primer sequences (5' – 3')                                | Amplicon length (bp) |
|----------------|----------------------------------------------------|-----------------------------------------------------------|----------------------|
| Medtr1g105850  | Salt stress response/antifungal domain protein     | F: ACAACCTCCATCACCAATACC<br>R: CAACGGGATCATATCCACTTCA     | 97                   |
| Medtr3g087510  | PLAT-plant-stress protein                          | F: GTCCTCATCATGGGTGGTATTG<br>R: GCAAGCCATTGTTCCACTTC      | 100                  |
| Medtr5g016010  | Peroxidase family protein                          | F: TGCCACTCTACGTCTCTTCTT<br>R: GGTGATCCCTCTCTGCTCTATT     | 101                  |
| Medtr5g083270  | Absciscic acid receptor                            | F: TTCGACTTGTTTCCGGTCTAC<br>R: CACCACCAACAACACTGAAAC      | 99                   |
| Medtr7g090160  | Pyrroline-5-carboxylate reductase                  | F: GTCGTCGTCTTCTCGGTAAA<br>R: GATTCCAGCAGCAACAGAAAC       | 105                  |
| Medtr0121s0060 | Stress responsive A/B barrel domain protein        | F: CCCTCACATTCTCACCATTCA<br>R: CTTGGGAAGTAGAGGACATCTTG    | 117                  |
| Medtr0034s0170 | Trehalose-6-phosphate synthase                     | F: GAGCCGATCTGTTGAAGTTAGA<br>R: GGTGATGTCATGGATTTGCTATG   | 99                   |
| Medtr7g111350  | Low temperature and salt responsive family protein | F: GCACAGCTACCTTCGTTGATA<br>R: TCCAGAACTCCACTTCCAAAC      | 90                   |
| G3PD*          | Glyceraldehyde-3-phosphate dehydrogenase           | F : CATCACAGCCACTCAGAAGAC<br>R: TGGAAGCACTTTGCCTACAG      | 127                  |
| Msc27**        | Translationally-controlled tumor-like protein      | F: GTTGAAGTAGACATTGGTGCTAACG<br>R: AGCTGAGTCATCAACACCCTCA | 69                   |

\* Primer sequences obtained from Kaundal et al. 2021 [23].

\*\* Primer sequences obtained from Wang et al. 2015 [152].
