# Supplementary material for: Elucidation of Physiological, Transcriptomic and Metabolomic Salinity Response Mechanisms in Medicago sativa
Source: MDPI journal article supplement (doi:10.3390/plants12102059), 2023-05-22
Supplement: s1 [file s1]

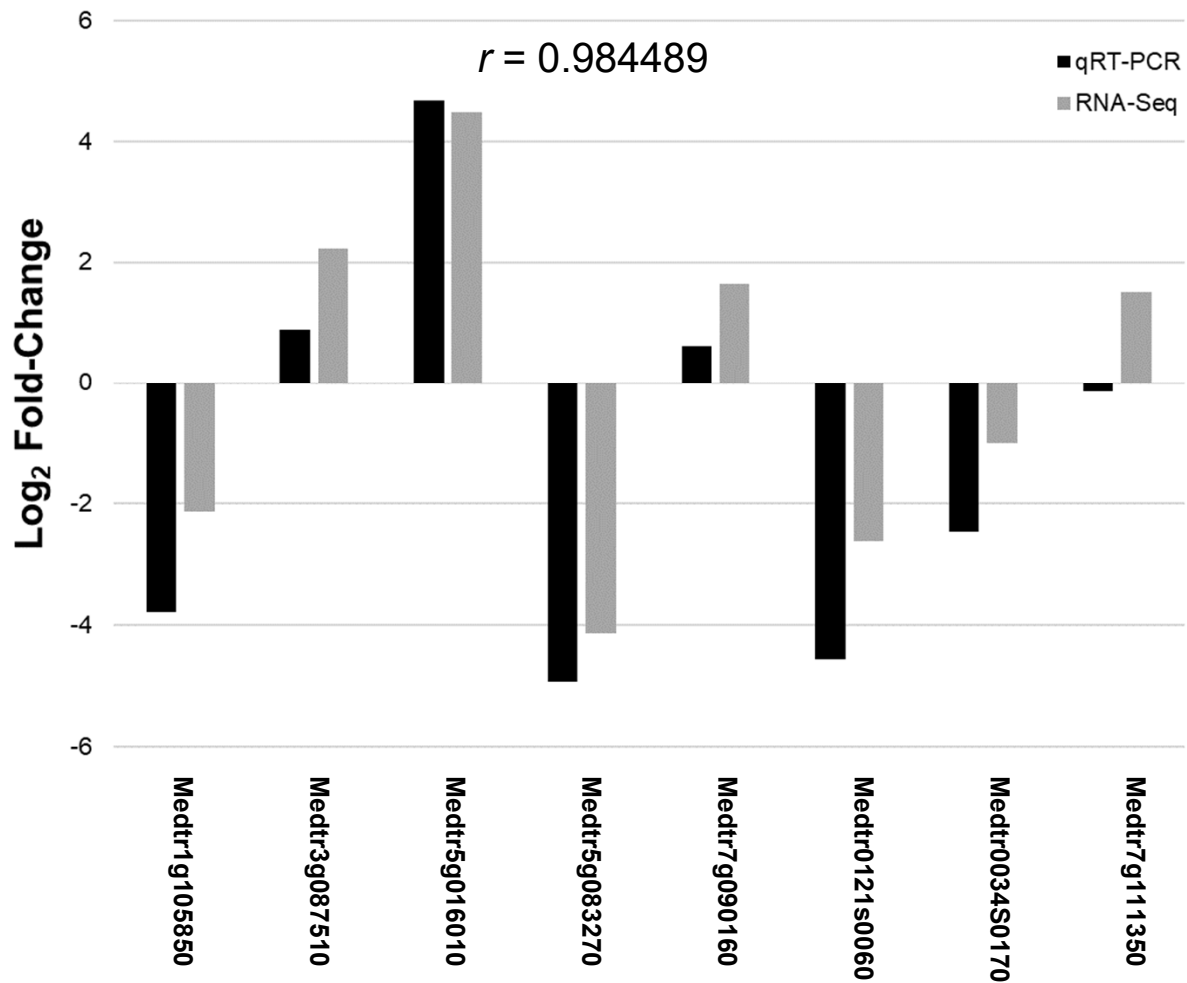

**Supplemental Figure S3.** Correlation between RNA-Seq and qRT-PCR data in the leaves of alfalfa cv. Beaver under salinity vs. non-saline conditions. Bars denote log<sub>2</sub>-fold changes between control and salinity conditions with qRT-PCR values displayed in black and RNA-Seq values shown in gray.  $r$  indicates the correlation coefficient between qRT-PCR and RNA-Seq log<sub>2</sub> fold-changes.
