# Supplementary material for: Elucidation of Physiological, Transcriptomic and Metabolomic Salinity Response Mechanisms in Medicago sativa
Source: Plants (Basel). 2023 May 22;12(10):2059. doi: 10.3390/plants12102059 (PMC10221938; doi:10.3390/plants12102059)
Supplement: Supplementary file 1 [file plants-12-02059-s001.zip]

Archive with 10 entries (10 files):
- plants-2403550-supplementary/Supplemental Figure 1 Root morphology (May 31 2023).pdf
- plants-2403550-supplementary/Supplemental Figure 2 Volcano and PCA RNASeq (Mar 31 2023).pdf
- plants-2403550-supplementary/Supplemental Figure 3 qRT-PCR validation (March 31 2023).pdf
- plants-2403550-supplementary/Supplemental Figure 4 Metabolomics (March 31 2023).pdf
- plants-2403550-supplementary/Supplemental File 1 DEGs and annotations (Jan 4 2023).xlsx
- plants-2403550-supplementary/Supplemental File 2 Mapman bins for DEGs (Mar 20 2023).xlsx
- plants-2403550-supplementary/Supplemental File 3 Metabolite classification (Mar 19 2023).xlsx
- plants-2403550-supplementary/Supplemental File 4 Joint pathway matched (Mar 16 2023).xlsx
- plants-2403550-supplementary/Supplemental File 5 Metabolomic processing (March 28 2023).pdf
- plants-2403550-supplementary/Supplemental Tables (May 1 2023).pdf
