# Supplementary material for: Elucidation of Physiological, Transcriptomic and Metabolomic Salinity Response Mechanisms in Medicago sativa
Source: Plants (Basel). 2023 May 22;12(10):2059. doi: 10.3390/plants12102059 (PMC10221938; doi:10.3390/plants12102059)
Supplement: Supplementary file 1 [file plants-12-02059-s001.zip › plants-2403550-supplementary/Supplemental File 1 DEGs and annotations (Jan 4 2023).xlsx]

## Sheet: DEGs and annotations
Gene ID	log2FC	p-value	FDR	Annotation
Medtr3g111880	-7.17474	5.35042e-05	0.0163938	MYB family transcription factor
Medtr1g093985	-6.67831	1.60217e-05	0.0163938	hypothetical protein
Medtr3g467290	-6.49796	0.000147728	0.0175359	cytochrome P450 family protein
Medtr6g092970	-6.01427	5.78162e-05	0.0168455	sodium transporter HKT1
Medtr7g490330	-5.98222	0.000508245	0.025054	strictosidine synthase family protein
Medtr6g023460	-5.29184	0.000144861	0.0174515	EF hand calcium-binding family protein
Medtr8g077390	-5.19585	0.000713425	0.0284992	MYB family transcription factor
Medtr6g084940	-5.18433	9.51313e-05	0.017207	PLAC8 family protein
Medtr8g099375	-4.98776	0.000253448	0.0203977	hypothetical protein
Medtr2g019530	-4.90665	0.000199436	0.0192612	inwardly rectifying potassium channel subunit
Medtr1g093600	-4.84428	1.3344e-05	0.0163938	AP2/ERF and B3 domain transcription factor
Medtr6g034975	-4.8104	0.000872095	0.0302169	vacuolar iron transporter-like protein
Medtr1g028460	-4.53585	2.52021e-05	0.0163938	bidirectional sugar transporter
Medtr2g436880	-4.51592	0.000198113	0.019241	flowering-promoting factor-like protein
Medtr3g462220	-4.28599	0.000143767	0.0174515	maternal effect embryo arrest protein, putative
Medtr2g095130	-4.23833	0.000307758	0.0214928	Ripening related protein family
Medtr5g083270	-4.12993	0.00218521	0.042532	abscisic acid receptor
Medtr1g075730	-4.11285	0.00132062	0.0347409	phosphatase 2C family protein
Medtr5g031305	-3.90251	0.00135335	0.035074	cinnamyl alcohol dehydrogenase-like protein
Medtr2g435650	-3.89894	4.85271e-05	0.0163938	hypothetical protein
Medtr3g082100	-3.8535	0.000545936	0.0258946	Lipid transfer protein
Medtr6g086170	-3.82097	0.00072479	0.0284992	sulfate/bicarbonate/oxalate exchanger and transporter sat-1
Medtr1g073350	-3.73148	0.00141185	0.0356102	CCT motif protein
Medtr1g074070	-3.67819	0.00156754	0.0369413	auxin-induced 5NG4-like protein
Medtr2g064580	-3.6385	0.00197841	0.0414432	leucine-rich receptor-like kinase family protein, putative
Medtr1g072540	-3.60726	1.48849e-05	0.0163938	adenylate isopentenyltransferase
Medtr5g026320	-3.60339	0.00202196	0.0416938	HXXXD-type acyl-transferase family protein
Medtr1g069200	-3.59607	0.00025449	0.0203977	cytochrome P450 family 72 protein
Medtr5g035750	-3.56844	0.000263059	0.0203977	DUF1262 family protein
Medtr8g077420	-3.40779	0.00105922	0.0320003	MYB family transcription factor
Medtr7g010710	-3.36968	6.59564e-05	0.017207	(E)-beta-ocimene/myrcene synthase
Medtr7g020980	-3.368	0.000421698	0.0240565	ethylene response factor
Medtr8g074335	-3.36602	0.000119052	0.017207	Chitinase (Class Ib) / Hevein
Medtr3g016275	-3.36351	8.50141e-05	0.017207	transmembrane protein, putative
Medtr7g028780	-3.32104	0.000242703	0.0200165	hypothetical protein
Medtr7g089210	-3.23971	0.00261899	0.0454989	MYB family transcription factor
Medtr5g055280	-3.21839	0.000454618	0.0245279	transmembrane protein, putative
Medtr1g043350	-3.14009	0.00107992	0.0323973	ethylene-responsive transcription factor 1B
Medtr1g093980	-3.11889	0.000385321	0.0228436	hypothetical protein
Medtr6g022180	-3.10879	0.000667198	0.0278313	cystinosin-like protein
Medtr3g016215	-3.07612	0.00138013	0.0352212	hypothetical protein
Medtr3g113870	-3.05906	0.00041405	0.0238103	NAD(P)-binding rossmann-fold protein
Medtr3g408340	-3.03993	0.00111845	0.0327671	derlin-2 protein
Medtr6g082190	-3.02712	1.23683e-05	0.0163938	hypothetical protein
Medtr2g040500	-3.0022	0.00071132	0.0284992	protein phosphatase 2C ABI2-like protein
Medtr7g021010	-2.99493	0.000505371	0.025054	ethylene response factor
Medtr5g031310	-2.99054	0.00106057	0.0320003	cinnamyl alcohol dehydrogenase-like protein
Medtr2g016580	-2.98894	0.000266926	0.0204284	LRR receptor-like kinase family protein
Medtr8g018750	-2.98735	0.00162171	0.0373926	disease resistance protein (TIR-NBS-LRR class), putative
Medtr4g063945	-2.98691	2.61526e-05	0.0163938	kinase 1B
Medtr1g110130	-2.95559	0.000860804	0.0301105	wall associated kinase-like protein
Medtr2g438760	-2.9534	7.1006e-05	0.017207	ankyrin repeat plant-like protein
Medtr6g043790	-2.93214	0.00057009	0.0261643	G-type lectin S-receptor-like Serine/Threonine-kinase plant
Medtr3g055120	-2.91986	0.000227172	0.0195898	Phytohormone-binding protein [Source:UniProtKB/Swiss-Prot;Acc:G7J032]
Medtr3g016200	-2.91131	0.00267954	0.046057	transmembrane protein, putative
Medtr3g095040	-2.90928	0.000303929	0.0213711	WRKY family transcription factor
Medtr3g009760	-2.88934	0.000240177	0.0199078	FAD-linked oxidoreductase
Medtr7g107040	-2.8887	0.000596188	0.0267867	gibberellin receptor GID1, putative
Medtr1g080680	-2.86549	0.000376221	0.022784	alba DNA/RNA-binding protein
Medtr6g075410	-2.84972	0.000384187	0.0228436	cyclic nucleotide gated channel protein
Medtr4g091780	-2.84456	0.00091534	0.0305678	G-type lectin S-receptor-like Serine/Threonine-kinase
Medtr3g088455	-2.82527	0.00287668	0.0472808	transmembrane amino acid transporter family protein
Medtr7g117200	-2.80406	0.00112535	0.0327886	WRKY family transcription factor
Medtr8g090270	-2.77413	4.42664e-05	0.0163938	MFS transporter
Medtr4g094610	-2.76673	0.00141478	0.0356102	LRR receptor-like kinase family protein
Medtr4g094275	-2.76521	0.000993567	0.0312908	chaperone DnaJ domain protein
Medtr8g020940	-2.71482	0.000466834	0.0245279	cytochrome P450 family monooxygenase
Medtr1g110870	-2.6919	1.06076e-05	0.0163938	zinc finger constans-like protein
Medtr8g018790	-2.68858	3.96012e-05	0.0163938	puromycin-sensitive aminopeptidase-like protein
Medtr6g033955	-2.68375	0.00101144	0.0315758	heat shock cognate 70 kDa protein
Medtr1g061170	-2.68257	0.000145203	0.0174515	heat shock transcription factor A3
Medtr6g082330	-2.67228	4.46029e-05	0.0163938	hypothetical protein
Medtr7g034535	-2.66715	0.000731883	0.0284992	beta-amyrin synthase
Medtr3g096450	-2.65816	0.00104955	0.031935	hypothetical protein
Medtr6g071280	-2.65729	0.000116793	0.017207	MAP kinase kinase
Medtr4g035180	-2.65024	0.000557864	0.0260108	Serine/Threonine-kinase CCR3-like protein
Medtr7g095430	-2.6364	0.00294886	0.0482199	sulfate/bicarbonate/oxalate exchanger and transporter sat-1
Medtr1g058490	-2.63593	0.000210239	0.0192612	F-box protein
Medtr3g009820	-2.62462	0.00153235	0.0367107	FAD-linked oxidoreductase
Medtr8g094580	-2.62229	0.000670332	0.0278412	NAC-like transcription factor
Medtr4g091680	-2.61913	0.000794459	0.0289517	G-type lectin S-receptor-like Serine/Threonine-kinase
Medtr6g033820	-2.61473	7.65652e-05	0.017207	heat shock cognate 70 kDa-like protein
Medtr0121s0060	-2.608	0.00037237	0.0227323	stress responsive A/B barrel domain protein
Medtr6g082280	-2.59892	0.000186205	0.0187473	hypothetical protein
Medtr3g096920	-2.5954	0.000118199	0.017207	NAC-like transcription factor
Medtr4g005880	-2.59419	0.000490401	0.0249309	D-3-phosphoglycerate dehydrogenase family protein
Medtr4g019580	-2.59171	0.000109631	0.017207	peptide/nitrate transporter plant
Medtr2g088980	-2.58295	0.00124896	0.034019	cysteine-rich RLK (receptor-like kinase) protein
Medtr5g090620	-2.58252	0.000217022	0.0195848	UDP-glucose flavonoid 3-O-glucosyltransferase
Medtr7g092700	-2.56705	0.000267704	0.0204284	PRA1 family protein
Medtr3g092890	-2.56356	0.000211026	0.0192612	2OG-Fe(II) oxygenase family oxidoreductase
Medtr3g088475	-2.56342	0.00221812	0.0426773	transmembrane amino acid transporter family protein
Medtr4g091820	-2.55981	0.00143303	0.0358818	G-type lectin S-receptor-like Serine/Threonine-kinase
Medtr5g056395	-2.5532	7.24925e-05	0.017207	transmembrane protein, putative
Medtr5g073750	-2.55019	0.00152608	0.0367107	transmembrane protein, putative
Medtr2g015850	-2.53928	0.000200499	0.0192612	papain family cysteine protease
Medtr3g014608	-2.53738	0.000329887	0.0217998	transmembrane protein, putative
Medtr1207s0010	-2.52766	0.000941555	0.0305678	heat shock cognate 70 kDa protein
Medtr8g089110	-2.50866	0.00232011	0.0437839	basic blue-like protein
Medtr6g033870	-2.50653	0.000284329	0.0209081	heat shock cognate 70 kDa-like protein
Medtr4g091760	-2.50072	0.000134382	0.017207	G-type lectin S-receptor-like Serine/Threonine-kinase
Medtr8g015200	-2.48452	0.00124709	0.0340163	LRR receptor-like kinase plant
Medtr1g085680	-2.47378	0.000740768	0.0284992	cytochrome P450 family 709 protein
Medtr2g073050	-2.45892	5.2678e-06	0.0163938	carboxyl-terminal peptidase
Medtr6g014270	-2.44771	0.000132157	0.017207	UDP-glucosyltransferase family protein
Medtr1g110140	-2.42915	2.67289e-05	0.0163938	cysteine-rich RLK (receptor-like kinase) protein
Medtr6g065270	-2.42913	0.000614952	0.0269021	carboxylesterase-like protein
Medtr7g062550	-2.41617	0.000542281	0.0258761	2OG-Fe(II) oxygenase family oxidoreductase
Medtr3g087900	-2.41539	0.0027784	0.0466625	zinc finger, C3HC4 type (RING finger) protein
Medtr6g465530	-2.41042	0.000480028	0.0247563	dehydration-responsive element-binding protein
Medtr6g040210	-2.40722	0.000145016	0.0174515	LRR receptor-like kinase family protein
Medtr3g467270	-2.40376	0.000909409	0.0305678	salicylic acid carboxyl methyltransferase
Medtr8g035860	-2.39746	0.00275367	0.0463687	cytochrome P450 family protein
Medtr4g101380	-2.37291	0.000611598	0.0269021	peptide/nitrate transporter
Medtr2g438640	-2.35648	0.00110287	0.0325279	ankyrin repeat plant-like protein
Medtr4g098930	-2.34967	3.49589e-05	0.0163938	expansin-B1-like protein
Medtr8g470380	-2.34731	0.00109298	0.0324854	Serine/Threonine kinase, plant-type protein, putative
Medtr4g091730	-2.33846	0.00123591	0.0338556	G-type lectin S-receptor-like Serine/Threonine-kinase, putative
Medtr7g107670	-2.3154	0.000854025	0.0300701	short-chain dehydrogenase/reductase
Medtr3g069540	-2.31368	0.000902966	0.0305678	transmembrane protein, putative
Medtr4g081665	-2.30366	0.000134129	0.017207	Serine/Threonine kinase family protein
Medtr7g102465	-2.3018	9.27717e-05	0.017207	UDP-glycosyltransferase 73C1
Medtr2g100350	-2.29213	0.00103282	0.0316665	inorganic pyrophosphatase
Medtr8g014700	-2.29195	0.00079493	0.0289517	LRR receptor-like kinase plant-like protein, putative
Medtr2g079300	-2.27877	0.00285672	0.0471967	DUF2921 family protein
Medtr3g105690	-2.2626	0.000410746	0.0237911	transmembrane protein
Medtr7g099860	-2.2611	0.0019753	0.0414421	transmembrane protein, putative
Medtr3g464530	-2.25761	4.12793e-05	0.0163938	2OG-Fe(II) oxygenase family oxidoreductase
Medtr6g086560	-2.24222	0.000111755	0.017207	sigma factor sigb regulation protein rsbq protein, putative
Medtr2g073020	-2.23649	0.0013761	0.0352212	carboxyl-terminal peptidase
Medtr4g081750	-2.22491	0.00101577	0.0316071	S-locus lectin kinase family protein
Medtr1g105750	-2.21701	0.00254399	0.0452552	cysteine-rich receptor-kinase-like protein
Medtr5g024420	-2.2138	0.0012806	0.0344521	LRR kinase family protein, putative
Medtr5g082130	-2.20731	0.000553724	0.025971	hypothetical protein
Medtr7g074870	-2.19671	0.00218325	0.042532	dihydroflavonol reductase
Medtr7g102450	-2.1959	9.21055e-05	0.017207	UDP-glucosyltransferase family protein
Medtr5g073610	-2.18518	0.00204041	0.0417415	transmembrane protein, putative
Medtr6g083780	-2.17433	0.00221341	0.0426773	receptor-like kinase
Medtr8g014790	-2.16987	0.00174451	0.0392979	LRR receptor-like kinase
Medtr2g438700	-2.16975	0.00173265	0.0391525	ankyrin repeat plant-like protein
Medtr7g015310	-2.16934	0.000208818	0.0192612	receptor-like kinase feronia-like protein
Medtr6g040230	-2.14848	0.000573768	0.0262699	choline/ethanolamine kinase
Medtr1g026990	-2.14238	0.000191224	0.0189873	stress-induced receptor-like kinase
Medtr2g102140	-2.13616	3.74187e-05	0.0163938	ovate transcriptional repressor
Medtr1g105850	-2.12775	0.000555899	0.0260096	salt stress response/antifungal domain protein
Medtr8g093090	-2.1212	0.000995837	0.0312908	WNK kinase
Medtr4g081650	-2.1165	0.00301348	0.0487373	S-locus lectin kinase family protein
Medtr6g036890	-2.1114	0.000231778	0.0196348	LRR receptor-like kinase
Medtr8g470560	-2.10822	0.00039524	0.0230317	LRR receptor-like kinase family protein
Medtr6g008140	-2.09672	0.000147359	0.0175359	disease resistance protein (TIR-NBS-LRR class)
Medtr5g011320	-2.09363	0.00286917	0.0472616	subtilisin-like serine protease
Medtr7g112130	-2.09307	0.000859821	0.0301105	nicotianamine synthase-like protein
Medtr8g021225	-2.08885	0.00122351	0.0337173	caffeoyl-CoA O-methyltransferase
Medtr7g063030	-2.08526	0.00012467	0.017207	L-type lectin-domain receptor kinase S.4
Medtr7g056103	-2.08195	0.00136259	0.0351642	cytochrome P450 family monooxygenase
Medtr1g110220	-2.07823	0.000464781	0.0245279	tyrosine kinase family protein
Medtr7g073640	-2.07818	0.000135945	0.017207	alpha-galactosidase-like protein
Medtr5g037140	-2.07459	0.000913024	0.0305678	transmembrane protein, putative
Medtr8g021233	-2.07041	6.8034e-05	0.017207	nucleoside diphosphate kinase-like protein
Medtr7g015230	-2.07018	0.000823954	0.0294162	receptor-like kinase feronia-like protein
Medtr1g074930	-2.06	4.47964e-05	0.0163938	high affinity inorganic phosphate transporter
Medtr4g076470	-2.05982	0.000169538	0.0182434	glucan endo-1,3-beta-glucosidase
Medtr7g013180	-2.05953	0.000494866	0.0249309	UDP-glucosyltransferase family protein
Medtr7g111770	-2.0585	0.00193145	0.0411315	hypothetical protein
Medtr7g074880	-2.05635	0.000417298	0.0238828	dihydroflavonol 4-reductase-like protein
Medtr0001s0660	-2.05079	0.000118941	0.017207	zinc-binding alcohol dehydrogenase family protein
Medtr1g038430	-2.05028	1.32131e-05	0.0163938	DnaJ heat shock amino-terminal domain protein
Medtr5g083170	-2.04908	0.000101897	0.017207	ferritin
Medtr6g083200	-2.04217	0.000486374	0.0248749	Chitinase / Hevein / PR-4 / Wheatwin2
Medtr6g065400	-2.04211	1.20532e-05	0.0163938	carboxylesterase-like protein
Medtr4g478140	-2.03736	0.000171296	0.0182434	S-norcoclaurine synthase-like protein
Medtr6g036840	-2.03463	0.000126348	0.017207	LRR receptor-like kinase family protein
Medtr1g095850	-2.02976	0.000150139	0.0177128	lateral organ boundaries (LOB) domain protein
Medtr8g099350	-2.02864	0.00285929	0.0471967	WRKY family transcription factor
Medtr2g438720	-2.02213	0.00242325	0.0444648	ankyrin repeat plant-like protein
Medtr2g015040	-2.02141	0.000113553	0.017207	ethylene response factor
Medtr6g045643	-2.02006	2.02724e-05	0.0163938	C2 domain protein
Medtr6g036870	-2.01749	0.000334192	0.021887	LRR receptor-like kinase
Medtr6g065370	-2.01506	3.59252e-05	0.0163938	CXE carboxylesterase
Medtr3g464370	-2.01281	0.0020403	0.0417415	mannose-binding lectin superfamily protein
Medtr7g007440	-1.99501	0.00129293	0.0344618	Nodule Cysteine-Rich (NCR) secreted peptide
Medtr7g015390	-1.9924	0.000103127	0.017207	feronia receptor-like kinase
Medtr1g054205	-1.98445	0.000625338	0.0269021	peroxidase family protein
Medtr2g037790	-1.97686	0.00297816	0.0484518	OSBP(oxysterol-binding protein)-related protein 4C
Medtr4g076440	-1.97114	0.000261026	0.0203977	glucan endo-1,3-beta-glucosidase
Medtr3g117590	-1.9694	0.000939332	0.0305678	GLN phosphoribosyl pyrophosphate amidotransferase
Medtr2g035105	-1.96782	5.93556e-05	0.017036	disease-resistance response protein
Medtr4g082580	-1.96708	0.000482767	0.0247563	WRKY transcription factor 3
Medtr5g068820	-1.96171	0.00127906	0.0344521	endonuclease/exonuclease/phosphatase family protein
Medtr7g009790	-1.95979	0.000897704	0.0305678	receptor-like protein, putative
Medtr7g083870	-1.95729	0.00314637	0.0495525	short-chain dehydrogenase/reductase
Medtr5g013620	-1.94685	0.000220035	0.0195898	beta-amylase
Medtr8g096310	-1.93586	0.00130226	0.0345391	bidirectional sugar transporter
Medtr7g047270	-1.9337	0.000303056	0.0213711	UDP-glucosyltransferase family protein
Medtr7g103560	-1.93154	0.0020116	0.0416394	NLI interacting factor-like phosphatase
Medtr8g022950	-1.92215	0.00222166	0.0426788	DUF581 family protein
Medtr1g111330	-1.91303	0.000355902	0.0224356	plasma-membrane choline transporter family protein
Medtr7g114980	-1.91156	0.000104398	0.017207	aldo/keto reductase family oxidoreductase
Medtr5g068100	-1.90316	0.000359848	0.0224356	methylesterase-like protein
Medtr8g006705	-1.90204	0.000334622	0.021887	homeobox associated leucine zipper protein
Medtr6g082950	-1.89822	0.000768325	0.0287101	receptor-like kinase
Medtr1g105700	-1.89527	0.000328518	0.0217998	cysteine-rich receptor-kinase-like protein
Medtr7g033800	-1.89255	0.00137294	0.0352022	lateral organ boundaries (LOB) domain protein
Medtr2g071790	-1.88938	0.000160397	0.0179328	hypothetical protein
Medtr6g452730	-1.88758	4.68422e-05	0.0163938	PAR1 protein
Medtr5g024450	-1.88608	8.43994e-05	0.017207	LRR receptor-like kinase family protein
Medtr2g074980	-1.88495	0.00075669	0.0284992	LRR receptor-like kinase
Medtr2g071740	-1.88425	0.00194577	0.0412223	hypothetical protein
Medtr6g036790	-1.88098	0.000412576	0.0238103	LRR receptor-like kinase family protein
Medtr3g081580	-1.87642	0.000693904	0.0284946	ZIP zinc/iron transport family protein
Medtr1g041885	-1.87011	0.00291729	0.0478664	peptide transporter PTR3-like protein
Medtr6g075290	-1.8683	0.000716631	0.0284992	cyclic nucleotide-gated cation channel protein
Medtr5g013640	-1.86402	0.000463427	0.0245279	beta-amylase
Medtr7g072140	-1.85375	0.0011974	0.0336864	LURP-one-like protein
Medtr1g069325	-1.84909	0.000223327	0.0195898	pfkB family carbohydrate kinase
Medtr6g012800	-1.84904	5.37072e-05	0.0163938	pectinesterase
Medtr3g070380	-1.84815	7.70221e-05	0.017207	cytochrome P450 family monooxygenase
Medtr3g012310	-1.84738	0.00200858	0.0416394	NBS-LRR type disease resistance protein
Medtr6g032880	-1.84699	0.00213943	0.0421292	NDH-dependent cyclic electron flow protein, putative
Medtr4g028830	-1.84649	0.000111362	0.017207	WNK kinase
Medtr2g040910	-1.84378	0.000381774	0.0228436	LRR receptor-like kinase
Medtr0406s0030	-1.84225	0.00107813	0.0323945	disease resistance protein (CC-NBS-LRR class) family protein
Medtr2g035100	-1.84131	4.5158e-05	0.0163938	Class-10 pathogenesis-related protein 1 [Source:UniProtKB/Swiss-Prot;Acc:P93333]
Medtr2g025470	-1.84048	0.00160554	0.0372833	light induced-like protein
Medtr1g078290	-1.83982	0.00165666	0.0379709	lysine ketoglutarate reductase trans-splicing-like protein
Medtr5g072860	-1.83639	0.00151089	0.0366386	UDP-glucosyltransferase family protein
Medtr3g049970	-1.8251	0.000355116	0.0224356	limonoid UDP-glucosyltransferase-like protein
Medtr7g047030	-1.82467	0.000346597	0.0220697	UDP-glucosyltransferase family protein
Medtr1g112740	-1.82117	3.49104e-05	0.0163938	FAD-dependent urate hydroxylase-like protein
Medtr6g036780	-1.82023	0.000466628	0.0245279	LRR receptor-like kinase
Medtr5g009290	-1.81511	0.000153581	0.0178297	hypothetical protein
Medtr7g015620	-1.8147	0.00226812	0.043184	feronia receptor-like kinase
Medtr7g015250	-1.81468	2.55644e-05	0.0163938	receptor-like kinase feronia-like protein
Medtr1g110180	-1.81236	0.00314226	0.0495525	wall associated kinase-like protein
Medtr1g108910	-1.80668	0.00190897	0.0409631	cysteine-rich RLK (receptor-like kinase) protein
Medtr3g013500	-1.79517	0.00136782	0.0352022	sulfotransferase
Medtr1g054880	-1.79399	0.00316356	0.0496615	pectinesterase/pectinesterase inhibitor
Medtr1g077840	-1.79175	0.000260609	0.0203977	OPT family oligopeptide transporter
Medtr6g011550	-1.78431	0.00144873	0.0360869	aldose 1-epimerase family protein
Medtr4g052300	-1.77249	0.00146434	0.0364286	short-chain dehydrogenase/reductase
Medtr8g006730	-1.7626	5.25693e-05	0.0163938	UDP-glucosyltransferase family protein
Medtr4g132320	-1.75787	0.000733501	0.0284992	multi-copper oxidase-like protein
Medtr1g007180	-1.7563	0.00029846	0.0212963	transmembrane amino acid transporter family protein
Medtr3g101900	-1.75403	0.00219318	0.0425578	HXXXD-type acyl-transferase family protein
Medtr1g010270	-1.75097	0.00261552	0.0454989	sulfate transporter-like protein
Medtr0078s0010	-1.74851	0.000283343	0.0209081	UDP-glucosyltransferase family protein
Medtr3g107770	-1.74773	0.000559984	0.0260108	rare lipoprotein A-like double-psi beta-barrel protein
Medtr5g092990	-1.74462	0.00135761	0.0351371	TIR-like domain protein TSDC protein
Medtr2g025580	-1.74448	0.000753468	0.0284992	blue copper-like protein
Medtr7g015320	-1.73403	0.000748521	0.0284992	receptor-like kinase feronia-like protein
Medtr7g067380	-1.73252	0.000174026	0.0182434	glycerol-3-phosphate acyltransferase
Medtr1g007240	-1.73048	0.000616074	0.0269021	transmembrane amino acid transporter family protein
Medtr4g100530	-1.72738	0.00197518	0.0414421	transmembrane protein, putative
Medtr3g083920	-1.72558	0.00157242	0.0369413	chalcone and stilbene synthase family protein
Medtr4g015180	-1.72359	0.000119914	0.017207	anthocyanin 5-aromatic acyltransferase
Medtr5g082270	-1.71662	0.0019118	0.0409631	LRR receptor-like kinase
Medtr1g040625	-1.71566	0.00153756	0.0367107	LRR receptor-like kinase family protein
Medtr1g043190	-1.70775	0.00023103	0.0196348	cryptochrome 2B apoprotein
Medtr4g035880	-1.704	0.00112253	0.0327788	plant invertase/pectin methylesterase inhibitor
Medtr4g052620	-1.70096	0.000119977	0.017207	NAC transcription factor-like protein
Medtr8g043480	-1.69933	0.00141373	0.0356102	inositol polyphosphate 5-phosphatase I
Medtr4g095032	-1.69922	0.000128558	0.017207	receptor-like kinase plant-like protein, putative
Medtr5g026150	-1.69875	0.000537051	0.0256903	LRR receptor-like kinase family protein
Medtr5g053920	-1.69706	0.0029838	0.0484615	AP2/ERF and B3 domain transcription factor
Medtr8g081120	-1.67634	0.00247093	0.0445812	UDP-glucose:glucosyltransferase, putative
Medtr7g078680	-1.67353	8.67971e-05	0.017207	polygalacturonase/glycoside hydrolase family protein
Medtr2g101920	-1.67042	0.00090295	0.0305678	transmembrane amino acid transporter family protein
Medtr3g091560	-1.66631	0.000178354	0.0182434	IQ calmodulin-binding motif protein
Medtr1g105710	-1.66629	0.00245034	0.0445395	cysteine-rich receptor-kinase-like protein
Medtr1g110120	-1.66586	0.00110072	0.0325279	wall associated kinase-like protein
Medtr5g025860	-1.66571	0.000777187	0.0287188	LRR receptor-like kinase family protein
Medtr8g083520	-1.659	0.000942625	0.0305678	NAD-dependent aldehyde dehydrogenase family protein
Medtr3g088100	-1.65875	0.00213854	0.0421292	zinc finger, C3HC4 type (RING finger) protein
Medtr4g013350	-1.64934	0.00190886	0.0409631	disease resistance response protein
Medtr8g011950	-1.64856	0.000885808	0.0305678	disease resistance protein (TIR-NBS-LRR class)
Medtr1g029950	-1.64623	0.002654	0.0458136	LRR receptor-like kinase
Medtr7g009510	-1.64196	0.0021343	0.0421292	leucine-rich receptor-like kinase family protein, putative
Medtr2g438740	-1.64094	8.42191e-05	0.017207	ankyrin repeat plant-like protein
Medtr3g075440	-1.64051	0.00274781	0.0463567	LRR receptor-like kinase family protein
Medtr8g015010	-1.63556	0.000224948	0.0195898	LRR receptor-like kinase plant
Medtr0006s0250	-1.63385	0.00209487	0.0418442	Rpp4C4, putative
Medtr2g015980	-1.6296	0.00260703	0.0454989	general regulatory factor 2
Medtr8g105590	-1.62363	4.68956e-05	0.0163938	flavin-binding kelch repeat F-box protein, putative
Medtr3g086940	-1.61904	0.000524816	0.0254854	Serine/Threonine-kinase SAPK1-like protein
Medtr2g078760	-1.61892	7.43629e-05	0.017207	protein phosphatase 2C-like protein
Medtr4g114550	-1.61555	0.0016802	0.0383277	IDS4-like protein
Medtr8g087710	-1.61389	0.00240892	0.0444648	major intrinsic protein (MIP) family transporter
Medtr7g015280	-1.6127	0.000142616	0.0174515	receptor-like kinase feronia-like protein
Medtr7g068190	-1.61047	0.000309098	0.0214928	receptor-like kinase
Medtr8g015100	-1.61018	8.74081e-05	0.017207	LRR receptor-like kinase
Medtr4g015960	-1.59245	0.00177648	0.0396853	LRR receptor-like kinase family protein
Medtr5g072830	-1.59076	0.00200006	0.0416246	UDP-glucosyltransferase family protein
Medtr4g075750	-1.59052	0.000463948	0.0245279	transmembrane amino acid transporter family protein
Medtr7g445390	-1.58863	0.000121667	0.017207	zinc ion-binding protein
Medtr4g095660	-1.58797	0.000366654	0.0226542	acetamidase/formamidase, putative
Medtr3g088520	-1.58552	0.00267408	0.046057	beta-like galactosidase
Medtr1g010240	-1.58433	0.00197159	0.0414421	wall associated kinase-like protein, putative
Medtr3g076950	-1.57532	0.000533201	0.0255697	phloem specific protein
Medtr7g074850	-1.57286	0.000206187	0.0192612	dihydroflavonol 4-reductase-like protein
Medtr5g026200	-1.56987	0.000594731	0.0267867	LRR receptor-like kinase family protein
Medtr6g023070	-1.56246	0.00148025	0.0365232	ankyrin repeat protein
Medtr8g104870	-1.55397	0.00180828	0.0400152	plant cadmium resistance protein
Medtr1g010250	-1.55315	0.00149474	0.0365232	wall-associated receptor kinase-like protein, putative
Medtr5g011800	-1.55288	0.000502035	0.025054	DUF1442 family protein
Medtr8g077180	-1.5483	0.00248486	0.0445812	soluble inorganic pyrophosphatase
Medtr7g100160	-1.54771	0.00158205	0.0370108	aluminum sensitive-like protein
Medtr1g076150	-1.53965	0.00202998	0.0416938	myb-related transcription factor LBM1
Medtr2g089290	-1.53763	0.00119184	0.0336057	S-locus lectin kinase family protein
Medtr2g091220	-1.53715	0.00194643	0.0412223	riboflavin kinase/fmn hydrolase
Medtr4g086470	-1.53315	0.000932018	0.0305678	CXE carboxylesterase
Medtr2g013210	-1.5257	0.00153856	0.0367107	receptor-like kinase
Medtr7g092230	-1.5237	5.37083e-05	0.0163938	oligopeptide transporter OPT family protein
Medtr1g090920	-1.52216	0.00019152	0.0189873	glycosyltransferase family protein
Medtr8g468620	-1.52084	0.00106335	0.0320003	LRR receptor-like kinase family protein
Medtr4g095490	-1.52054	0.00208746	0.0418442	transcriptional regulator of RNA polII, SAGA, subunit
Medtr1g081625	-1.516	0.00194105	0.041199	O-acetylserine (thiol) lyase
Medtr3g028630	-1.51315	0.00200684	0.0416394	stress-induced receptor-like kinase
Medtr6g007985	-1.51095	0.000616922	0.0269021	lipase
Medtr8g020870	-1.50292	0.000238567	0.0198599	transmembrane protein, putative
Medtr7g015290	-1.50014	0.000367556	0.0226542	feronia receptor-like kinase
Medtr7g079720	-1.49821	0.000459482	0.0245279	auxin efflux carrier family transporter
Medtr4g013325	-1.49685	0.00208702	0.0418442	disease resistance response protein
Medtr1g076400	-1.49366	0.00166384	0.0380901	E3 ubiquitin ligase PUB14, putative
Medtr3g011300	-1.48275	4.34554e-05	0.0163938	NBS-LRR type disease resistance protein
Medtr2g075010	-1.4824	0.000474468	0.0247563	LRR receptor-like kinase
Medtr7g102490	-1.48236	0.000121168	0.017207	UDP-glucosyltransferase family protein
Medtr5g034980	-1.48227	0.00121914	0.0337173	nodulin MtN21/EamA-like transporter family protein
Medtr0830s0010	-1.48107	0.00205148	0.0417901	LRR receptor-like kinase family protein
Medtr5g070090	-1.48106	0.00204719	0.0417901	UDP-glucosyltransferase family protein
Medtr6g014170	-1.48043	0.00244203	0.0445395	UDP-glucosyltransferase family protein
Medtr5g009670	-1.477	0.000328954	0.0217998	glucose-6-phosphate 1-epimerase-like protein
Medtr1g010260	-1.47598	0.000751892	0.0284992	wall-associated receptor kinase-like protein
Medtr8g105700	-1.47265	0.00222884	0.0427252	MACPF domain protein
Medtr1g111060	-1.46687	0.00148229	0.0365232	hypothetical protein
Medtr3g008580	-1.46534	0.00228236	0.0432412	monocopper oxidase SKS1-like protein
Medtr3g467560	-1.46267	0.000122682	0.017207	salicylic acid carboxyl methyltransferase
Medtr8g469830	-1.46234	0.000129393	0.017207	LRR receptor-like kinase family protein, putative
Medtr8g009120	-1.4615	0.00148996	0.0365232	1-aminocyclopropane-1-carboxylate oxidase-like protein
Medtr3g082630	-1.46075	0.00152993	0.0367107	B-box type zinc finger protein
Medtr4g070660	-1.45313	0.00149437	0.0365232	transmembrane protein, putative
Medtr1g032930	-1.44745	0.00100712	0.0315423	receptor-like kinase
Medtr1g040615	-1.44607	6.77892e-05	0.017207	LRR receptor-like kinase family protein
Medtr7g407090	-1.44207	0.000792517	0.0289517	LRR receptor-like kinase family protein
Medtr4g095042	-1.44032	0.000140242	0.0174515	LRR receptor-like kinase
Medtr4g076490	-1.43919	0.00050846	0.025054	glucan endo-1,3-beta-glucosidase
Medtr7g013790	-1.43023	0.00317391	0.0497427	serine carboxypeptidase-like protein
Medtr5g022970	-1.42987	0.00275708	0.0463855	hypothetical protein
Medtr1g116790	-1.42976	0.000706313	0.0284992	transcription factor
Medtr4g080750	-1.42414	0.00243137	0.0445395	anaphase-promoting complex subunit 11 RING-H2 finger protein
Medtr1g040545	-1.42335	0.000112903	0.017207	LRR receptor-like kinase family protein
Medtr3g455790	-1.41937	0.00306984	0.0490308	ankyrin repeat protein
Medtr0027s0230	-1.41904	0.000697186	0.0284946	cytosolic class I small heat shock protein
Medtr5g067700	-1.41813	0.00118411	0.033486	WRKY family transcription factor
Medtr7g113970	-1.41783	0.000285951	0.0209081	sugar porter (SP) family MFS transporter
Medtr8g447220	-1.41739	8.63448e-05	0.017207	calcium-dependent phospholipid-binding copine family protein
Medtr4g070080	-1.41099	5.25756e-05	0.0163938	RNA-binding (RRM/RBD/RNP motif) family protein
Medtr4g050762	-1.40866	0.000302914	0.0213711	CAP, cysteine-rich secretory protein, antigen 5
Medtr8g073850	-1.40809	0.00315308	0.0495525	disease resistance-responsive, dirigent domain protein
Medtr4g057960	-1.40677	0.00143768	0.0359047	P-loop nucleoside triphosphate hydrolase superfamily protein
Medtr1g081620	-1.40654	7.34474e-05	0.017207	O-acetylserine (thiol) lyase
Medtr5g015490	-1.4029	0.000337208	0.0219121	GRAS family transcription factor
Medtr8g033070	-1.39768	0.00225655	0.0430064	TCP family transcription factor
Medtr6g083740	-1.39485	0.00236065	0.0440594	receptor-like kinase
Medtr8g047160	-1.39394	0.000621778	0.0269021	LRR receptor-like kinase family protein
Medtr7g083330	-1.39174	0.00310699	0.0494188	NAC transcription factor-like protein
Medtr7g033325	-1.38739	3.23591e-05	0.0163938	beta-1,4-N-acetylglucosaminyltransferase-like protein
Medtr4g082830	-1.38335	0.00150975	0.0366386	nodulin-like protein
Medtr4g134460	-1.38152	0.00179496	0.0398661	NAC transcription factor-like protein
Medtr3g011360	-1.37936	0.00102165	0.0316665	NB-ARC domain disease resistance protein
Medtr8g093750	-1.37713	0.00214261	0.0421292	TPR repeat protein
Medtr1g040555	-1.37313	0.000130353	0.017207	LRR receptor-like kinase family protein
Medtr3g088975	-1.37228	0.00153333	0.0367107	transmembrane protein, putative
Medtr6g084590	-1.36801	0.000439127	0.0243091	hypothetical protein
Medtr2g073650	-1.36675	0.000663164	0.0277232	LRR receptor-like kinase
Medtr8g096900	-1.36582	0.00139612	0.0354037	pathogenesis-related thaumatin family protein
Medtr7g062950	-1.36558	0.000339209	0.0219121	L-type lectin-domain receptor kinase IV.2-like protein
Medtr4g084710	-1.36503	0.000578896	0.0263796	serine carboxypeptidase-like protein
Medtr1g051625	-1.36488	0.0018342	0.0402186	Rpp4C4
Medtr1g059970	-1.3634	0.00015711	0.0178771	glutathione S-transferase, amino-terminal domain protein
Medtr4g039540	-1.36219	0.00268007	0.046057	hypothetical protein
Medtr3g452750	-1.35733	0.00218861	0.042555	LRR receptor-like kinase
Medtr4g016810	-1.35584	0.00185006	0.040421	leucine-rich receptor-like kinase family protein, putative
Medtr7g061720	-1.35139	0.000956361	0.030821	expansin-A1-like protein
Medtr1g022265	-1.34916	0.00092433	0.0305678	LRR receptor-like kinase family protein
Medtr1g013820	-1.34806	0.00280174	0.0467686	chorismate mutase
Medtr2g020830	-1.3432	0.000138498	0.0174073	plant/F10N7-170 protein, putative
Medtr7g007550	-1.3409	0.0011416	0.0328636	LRR receptor-like kinase family protein
Medtr7g096950	-1.33681	0.00247685	0.0445812	DUF761 domain protein
Medtr7g406860	-1.33527	0.00283733	0.0470767	NADP-dependent alkenal double bond reductase
Medtr3g086910	-1.32794	0.000742533	0.0284992	G protein coupled receptor
Medtr8g494200	-1.32532	0.000134245	0.017207	phytoalexin deficient protein
Medtr5g082220	-1.32421	0.000457963	0.0245279	Auxin transporter-like protein 1 [Source:UniProtKB/Swiss-Prot;Acc:Q9FEL8]
Medtr8g047210	-1.32368	0.00178843	0.0398049	LRR receptor-like kinase family protein
Medtr8g006710	-1.32226	0.00115904	0.0332166	UDP-glucosyltransferase family protein
Medtr1g036800	-1.32198	0.00272249	0.046257	disease resistance protein (CC-NBS-LRR class) family protein
Medtr3g028520	-1.32146	0.000422833	0.0240565	transcription factor bHLH122-like protein
Medtr8g030690	-1.31887	0.00239741	0.0443717	U-box kinase family protein
Medtr4g099050	-1.3124	0.000122225	0.017207	ethphon-induced protein
Medtr4g091370	-1.31017	0.000281914	0.0209081	sugar porter (SP) family MFS transporter
Medtr3g095840	-1.3096	0.0028349	0.0470767	histone-lysine N-methyltransferase ATXR6-like protein
Medtr1g035690	-1.30867	0.00273318	0.0463335	dishevelled/Egl-10/leckstrin domain protein
Medtr8g107000	-1.30715	0.000235912	0.0197655	MAP kinase kinase kinase-like protein
Medtr5g092820	-1.30574	0.000310712	0.0214928	eukaryotic translation initiation factor SUI1
Medtr8g015040	-1.29855	0.00153547	0.0367107	LRR receptor-like kinase plant
Medtr4g080100	-1.29053	0.00234427	0.0438972	phospholipase A1
Medtr1g076330	-1.29053	0.00206085	0.0418039	ion channel pollux-like protein
Medtr0110s0040	-1.28897	0.00308198	0.0491431	glycoside hydrolase family 1 protein
Medtr4g011310	-1.28856	0.00130716	0.0345493	LRR receptor-like kinase
Medtr8g469650	-1.27846	0.00129771	0.0345157	LRR receptor-like kinase family protein
Medtr0318s0020	-1.27637	0.000201448	0.0192612	DUF3475 domain protein
Medtr7g024320	-1.27633	0.000565391	0.0261358	ACT domain protein
Medtr1g010050	-1.27004	0.00298726	0.0484676	GGL domain protein
Medtr8g080520	-1.26674	0.000946362	0.0306373	cytochrome P450 family 78 protein
Medtr8g090350	-1.26665	0.000924541	0.0305678	ethylene response factor
Medtr3g055230	-1.26578	0.000633243	0.0270997	disease resistance protein (CC-NBS-LRR class) family protein
Medtr2g095510	-1.26249	0.00251882	0.0450576	4-coumarate:CoA ligase-like protein
Medtr2g040510	-1.26221	0.00134002	0.0348695	MAP kinase kinase
Medtr7g103870	-1.2621	0.0026192	0.0454989	D-mannose-binding lectin protein, putative
Medtr7g085630	-1.26077	0.0014926	0.0365232	NADP-specific glutamate dehydrogenase
Medtr4g022430	-1.25362	0.00287375	0.0472731	3-ketoacyl-CoA thiolase 2, peroxisomal-like protein
Medtr3g027650	-1.2535	0.000161342	0.0179341	transcription factor bHLH122-like protein
Medtr8g103490	-1.25224	0.00010077	0.017207	peroxisomal membrane 22 kDa (Mpv17/PMP22) family protein
Medtr4g122830	-1.24984	0.000720817	0.0284992	hypothetical protein
Medtr7g015240	-1.24713	0.00103409	0.0316665	feronia receptor-like kinase
Medtr3g064370	-1.24617	0.00263009	0.0456057	flavin containing amine oxidase
Medtr1g014070	-1.24277	0.00071303	0.0284992	phototropic-responsive NPH3 family protein
Medtr1g442750	-1.24194	0.00208065	0.0418442	disease resistance protein (CC-NBS-LRR class) family protein
Medtr1g109430	-1.23756	0.00283191	0.047068	lipid phosphate phosphatase-like protein
Medtr3g011840	-1.2358	0.00110209	0.0325279	multidrug resistance protein ABC transporter family protein
Medtr5g016540	-1.23112	0.000285793	0.0209081	ADP-ribosylation factor-like protein A1D
Medtr1g029840	-1.22894	0.00103414	0.0316665	NAD-dependent aldehyde dehydrogenase family protein
Medtr8g061950	-1.22179	0.000915265	0.0305678	glutathione S-transferase, amino-terminal domain protein
Medtr4g095012	-1.21874	0.000153969	0.0178297	LRR receptor-like kinase
Medtr5g013370	-1.21551	5.57398e-05	0.0164904	GATA transcription factor-like protein
Medtr6g088680	-1.21436	0.000724865	0.0284992	senescence/dehydration-associated-like protein
Medtr6g033335	-1.21156	0.000481327	0.0247563	tetraspanin family protein
Medtr2g009310	-1.20853	0.000769967	0.0287101	RING-H2 zinc finger protein
Medtr1g040195	-1.20774	0.00069582	0.0284946	benzyl alcohol O-benzoyltransferase
Medtr3g460790	-1.20637	0.00277082	0.046576	nudix family hydrolase
Medtr3g072830	-1.20483	0.0016422	0.0376844	camphor resistance CrcB-like protein
Medtr2g090210	-1.19836	0.00153868	0.0367107	plant/F9H3-4 protein
Medtr3g077890	-1.19048	0.000645013	0.0273207	DUF1645 family protein
Medtr5g090670	-1.19007	0.00159129	0.0371366	UDP-glucose flavonoid 3-O-glucosyltransferase
Medtr0069s0090	-1.18951	0.00150632	0.0366386	Rpp4C4
Medtr3g084450	-1.18767	9.37738e-05	0.017207	long-chain-fatty-acid CoA ligase (AMP-forming)
Medtr7g102750	-1.18678	0.00217544	0.0424897	eukaryotic aspartyl protease family protein
Medtr8g008840	-1.18466	0.00176211	0.0395858	ethphon-induced protein
Medtr2g030420	-1.18109	0.00174077	0.0392899	P-loop nucleoside triphosphate hydrolase superfamily protein
Medtr3g099670	-1.17943	0.0012163	0.0337173	clathrin assembly protein
Medtr8g012960	-1.17855	0.0019762	0.0414421	RPM1 interacting protein 4 transcript protein
Medtr0006s0240	-1.17725	0.00234524	0.0438972	disease resistance protein (CC-NBS-LRR class) family protein
Medtr2g090755	-1.17452	0.00233548	0.0438393	glutaredoxin-C1 protein
Medtr3g064090	-1.1719	0.00248523	0.0445812	cysteine-rich RLK (receptor-like kinase) protein
Medtr4g126210	-1.16866	0.00079821	0.0290162	DUF4408 domain protein
Medtr1g108440	-1.16821	0.000601888	0.0268546	ribose-5-phosphate isomerase A
Medtr1g112780	-1.16321	0.00129023	0.0344618	FAD/NAD(P)-binding oxidoreductase family protein
Medtr1g040525	-1.16215	0.000113063	0.017207	LRR receptor-like kinase family protein
Medtr5g033690	-1.15949	0.00317873	0.0497634	cysteine-rich receptor-like kinase
Medtr8g083300	-1.15922	0.00246748	0.0445812	UDP-glucose:glucosyltransferase, putative
Medtr3g092780	-1.15638	0.000295276	0.0211871	PRR response regulator
Medtr3g092840	-1.15089	0.000601587	0.0268546	transparent testa glabra protein
Medtr8g465340	-1.14748	0.00263835	0.0456324	LRR receptor-like kinase
Medtr3g058630	-1.14706	0.000446794	0.0244086	ZIP metal ion transporter family protein
Medtr2g073520	-1.14462	0.00262431	0.0455464	LRR receptor-like kinase
Medtr4g061360	-1.14365	0.00105703	0.0320003	PRR response regulator
Medtr5g055150	-1.14319	0.00216653	0.0424259	Tat-binding protein 1(TBP-1)-interacting protein
Medtr5g072840	-1.14227	0.00120828	0.0337173	UDP-glucosyltransferase family protein
Medtr3g072030	-1.14188	0.000773198	0.0287101	wound-induced-like protein
Medtr8g039950	-1.13812	0.00206064	0.0418039	benzyl alcohol O-benzoyltransferase
Medtr8g047230	-1.13609	0.00113256	0.0328132	LRR receptor-like kinase family protein
Medtr3g027330	-1.13484	0.0028285	0.0470519	receptor-like protein
Medtr7g114990	-1.13365	0.000837784	0.0296696	aldo/keto reductase family oxidoreductase
Medtr5g070700	-1.12416	0.00248375	0.0445812	cytochrome P450 family 71 protein
Medtr8g470400	-1.12235	0.001703	0.038614	LRR receptor-like kinase family protein
Medtr4g010140	-1.12228	0.00100136	0.0314128	post-illumination chlorophyll fluorescence increase
Medtr7g094350	-1.12174	0.00128978	0.0344618	SCF ubiquitin ligase, SKP1 component
Medtr1g057560	-1.11811	0.00223221	0.0427252	exocyst subunit exo70 family protein
Medtr0070s0020	-1.11751	0.00223981	0.0427731	LRR receptor-like kinase family protein
Medtr7g102560	-1.11194	0.0014068	0.0355956	UDP-glucosyltransferase family protein
Medtr8g070880	-1.10448	0.000450385	0.0244974	LRR receptor-like kinase
Medtr5g029750	-1.10391	0.00103162	0.0316665	ABC transporter B family-like protein
Medtr3g462150	-1.10263	0.00215813	0.0423047	DUF641 family protein
Medtr8g102620	-1.09367	0.00280008	0.0467686	NADP-dependent malic enzyme-like protein
Medtr1g111400	-1.09094	0.00199964	0.0416246	P-loop nucleoside triphosphate hydrolase superfamily protein
Medtr1g114520	-1.09014	0.000928763	0.0305678	anthranilate synthase alpha 1
Medtr7g113880	-1.0897	0.000477828	0.0247563	homoglutathione synthetase
Medtr7g007630	-1.08795	0.000902109	0.0305678	LRR receptor-like kinase family protein
Medtr0294s0020	-1.08743	0.00138992	0.0353546	proton-dependent oligopeptide transport family protein
Medtr0025s0060	-1.08581	0.000414793	0.0238103	tripeptidyl peptidase II
Medtr7g029030	-1.08057	0.00188703	0.0407727	peroxidase family protein
Medtr5g017450	-1.07788	0.000357658	0.0224356	DUF1685 family protein
Medtr8g045070	-1.07784	0.000441183	0.0243093	membrane calcium-translocating P-type ATPase
Medtr1g107555	-1.07503	0.000205991	0.0192612	spore coat A-like protein
Medtr7g104680	-1.07405	0.00210319	0.0418867	iron-sulfur assembly IscA-like protein
Medtr3g040410	-1.0728	0.0020556	0.0418039	flavonol synthase/flavanone 3-hydroxylase
Medtr7g099910	-1.07265	0.00130397	0.0345391	ion channel regulatory protein UNC-93
Medtr4g070140	-1.07157	0.00074606	0.0284992	RNA-binding (RRM/RBD/RNP motif) family protein
Medtr7g071440	-1.06803	7.48211e-05	0.017207	SCAR2, putative
Medtr4g122980	-1.06785	0.00198107	0.0414537	beta-glucosidase
Medtr4g127420	-1.06567	0.000178324	0.0182434	import apparatus protein
Medtr4g095018	-1.06296	0.00060887	0.0269021	carbohydrate-binding protein of the ER protein
Medtr2g009660	-1.0604	0.000386072	0.0228436	costars family protein abracl protein
Medtr4g108250	-1.0583	0.000553699	0.025971	UDP-glucosyltransferase family protein
Medtr3g088110	-1.05117	0.00110573	0.0325623	NAC-like transcription factor
Medtr2g090960	-1.05085	0.00120881	0.0337173	TCP family transcription factor
Medtr4g084180	-1.04888	0.00248426	0.0445812	sulfiredoxin
Medtr3g105530	-1.04805	0.000478267	0.0247563	plant organelle RNA recognition domain protein
Medtr2g073540	-1.04492	0.000972663	0.0308795	cysteine-rich RLK (receptor-like kinase) protein
Medtr6g013960	-1.04435	0.00313774	0.0495525	UDP-glucosyltransferase family protein
Medtr1g104650	-1.0395	0.000130812	0.017207	linoleate 9S-lipoxygenase-like protein
Medtr3g020670	-1.03486	0.000339217	0.0219121	short-chain dehydrogenase/reductase
Medtr1g021955	-1.03243	0.00193033	0.0411315	PPR containing plant-like protein
Medtr4g092840	-1.0299	0.000581811	0.0264497	phosphoglycerate mutase family protein
Medtr4g093650	-1.02838	0.00026277	0.0203977	RNA-binding KH domain protein
Medtr1g060590	-1.02507	0.000159961	0.0179328	calmodulin-binding family protein
Medtr1g061050	-1.02505	0.000810071	0.0292813	fructose-bisphosphate aldolase
Medtr6g038200	-1.02476	0.000168684	0.0182434	UDP-glucosyltransferase family protein
Medtr3g079450	-1.02391	0.00188241	0.0407643	linoleate 13S-lipoxygenase 2-1, related protein
Medtr1g008700	-1.02179	0.000546709	0.0258946	2-on-2 hemoglobin
Medtr4g091670	-1.02119	0.00113997	0.0328636	G-type lectin S-receptor-like Serine/Threonine-kinase
Medtr4g100480	-1.01656	0.00169264	0.0384769	nudix family hydrolase
Medtr2g028950	-1.0157	0.000634157	0.0270997	regulatory protein NPR1
Medtr4g109720	-1.01546	0.000185143	0.0187385	ABC transporter B family protein
Medtr3g112160	-1.01494	0.00104598	0.0319273	wound-responsive family protein
Medtr0022s0430	-1.01487	0.000314975	0.021555	plant regulator RWP-RK family protein
Medtr5g017650	-1.01289	0.00232926	0.0438275	plant cadmium resistance protein
Medtr7g069640	-1.00833	0.002611	0.0454989	ammonium transporter 1 protein
Medtr8g011430	-1.00124	0.000710754	0.0284992	lectin kinase family protein
Medtr4g123870	-0.999038	0.00092532	0.0305678	Pti1-like kinase
Medtr8g088745	-0.999015	0.0028589	0.0471967	Serine/Threonine kinase domain protein
Medtr3g115580	-0.997825	0.00062254	0.0269021	high mobility group (HMG)-box protein
Medtr0034s0170	-0.997178	0.000394943	0.0230317	trehalose-6-phosphate synthase
Medtr8g467380	-0.996884	0.00122602	0.0337173	transmembrane protein, putative
Medtr7g067120	-0.99353	0.00156869	0.0369413	UDP-glucosyltransferase family protein
Medtr2g098430	-0.993157	0.000314073	0.021555	UDP-glucosyltransferase family protein
Medtr5g036240	-0.989421	0.00207075	0.0418414	TIR-NBS-LRR class disease resistance protein
Medtr4g107810	-0.987773	0.000234694	0.0197655	SPFH/band 7/PHB domain membrane-associated family protein
Medtr2g087980	-0.982776	0.00278544	0.0466992	cellulose synthase H1-like protein
Medtr8g091600	-0.982711	0.000758794	0.0284992	transmembrane protein, putative
Medtr8g469690	-0.979615	0.00223986	0.0427731	leucine-rich receptor-like kinase family protein
Medtr3g009510	-0.978882	0.00142308	0.0356789	UDP-glucosyltransferase family protein
Medtr8g107410	-0.97828	0.000727835	0.0284992	ATP-binding ABC transporter
Medtr3g102270	-0.977726	0.00209037	0.0418442	DCL protein
Medtr8g088590	-0.977646	0.00103235	0.0316665	integrin-linked kinase family protein
Medtr1g022465	-0.976022	0.000171938	0.0182434	salicylic acid carboxyl methyltransferase
Medtr3g069160	-0.975976	0.00187319	0.0406562	folylpolyglutamate synthase
Medtr4g072320	-0.975653	0.00247747	0.0445812	aldo/keto reductase family oxidoreductase
Medtr4g114960	-0.974154	0.0032036	0.0499999	clathrin assembly plant-like protein, putative
Medtr5g025280	-0.968512	0.000517845	0.0252745	GDA1/CD39 nucleoside phosphatase family protein
Medtr3g092900	-0.967554	0.000909469	0.0305678	caffeic acid O-methyltransferase
Medtr1g037010	-0.967531	0.00318041	0.0497634	NBS-LRR type disease resistance protein
Medtr1g031590	-0.964111	0.0023645	0.0440594	O-fucosyltransferase family protein
Medtr3g090820	-0.963567	0.00207328	0.0418414	solute carrier family protein
Medtr3g100620	-0.959102	0.000643786	0.0273207	general regulatory factor 2
Medtr4g072110	-0.957194	0.0013823	0.0352212	GLN phosphoribosyl pyrophosphate amidotransferase
Medtr7g109970	-0.956694	0.000496545	0.0249309	nitrogen regulatory protein P-II
Medtr3g011820	-0.947074	0.00174695	0.0392979	multidrug resistance protein ABC transporter family protein
Medtr2g028550	-0.941512	0.00180456	0.039979	kinetochore NDC80-like protein
Medtr4g088750	-0.934452	0.00177978	0.0397043	tyrosine kinase family protein
Medtr8g037235	-0.933711	0.00180328	0.039979	disease resistance protein (TIR-NBS-LRR class)
Medtr7g085420	-0.927941	0.000450967	0.0244974	HNH endonuclease domain protein
Medtr5g070320	-0.924663	0.000192539	0.0189873	pleiotropic drug resistance subfamily G protein
Medtr1g101540	-0.923418	0.00101518	0.0316071	TraB family protein
Medtr7g084830	-0.922575	0.00257994	0.0454989	PPR containing plant-like protein
Medtr6g038220	-0.92191	0.000244611	0.0200165	UDP-glucosyltransferase family protein
Medtr3g100100	-0.918093	0.00148938	0.0365232	TPR domain protein
Medtr5g079600	-0.913348	0.00136414	0.0351642	transmembrane protein, putative
Medtr4g070190	-0.912601	0.00275055	0.0463567	RNA-binding (RRM/RBD/RNP motif) family protein
Medtr7g115530	-0.911375	0.00162808	0.0374946	myb-like transcription factor family protein
Medtr5g095470	-0.904296	0.00270171	0.0461596	serine acetyltransferase
Medtr1g076370	-0.903269	0.000864404	0.0301105	CBL-interacting kinase
Medtr3g408350	-0.901724	0.000750781	0.0284992	cell number regulator-like protein
Medtr8g026730	-0.900169	0.00133412	0.0348574	SAUR-like auxin-responsive family protein
Medtr4g045973	-0.899919	0.00200826	0.0416394	diacylglycerol kinase domain protein
Medtr4g021170	-0.891994	0.00248307	0.0445812	disease resistance protein (TIR-NBS-LRR class)
Medtr4g094905	-0.89176	0.000438909	0.0243091	tRNA-dihydrouridine synthase-like protein
Medtr4g030060	-0.891131	0.00241776	0.0444648	cytoplasmic membrane protein
Medtr1g107380	-0.890922	0.000828648	0.0294545	UDP-glucosyltransferase family protein
Medtr1g053835	-0.887891	0.00240818	0.0444648	myb-like transcription factor family protein
Medtr0077s0010	-0.881248	0.000971973	0.0308795	hypothetical protein
Medtr6g070920	-0.880159	0.000283481	0.0209081	nudix hydrolase-like protein
Medtr5g030530	-0.875044	0.000605285	0.0269021	carnitine/acylcarnitine carrier-like protein
Medtr2g075410	-0.873393	0.0014131	0.0356102	brassinazole-resistant 1 protein
Medtr5g011780	-0.868948	0.000453323	0.0245279	CPD photolyase
Medtr8g027620	-0.861731	0.00311228	0.0494213	calcineurin B-like protein 4-1
Medtr3g064080	-0.860581	0.00110934	0.0326187	cysteine-rich RLK (receptor-like kinase) protein
Medtr8g076490	-0.859708	0.00170417	0.038614	ubiquitin-conjugating enzyme
Medtr6g092700	-0.858163	0.00117582	0.0334483	thioredoxin
Medtr4g105610	-0.85756	0.000786296	0.0289111	CO2+/MG2+ efflux protein ApaG
Medtr6g007760	-0.857156	0.000481867	0.0247563	nodulin MtN21/EamA-like transporter family protein
Medtr4g063940	-0.855143	0.00185813	0.0404663	kinase 1B
Medtr8g446430	-0.85457	0.000618613	0.0269021	inwardly rectifying potassium channel subunit
Medtr2g034440	-0.850663	0.00172144	0.038945	glucan endo-1,3-beta-glucosidase, basic protein
Medtr8g031550	-0.848232	0.00131513	0.0346438	potassium efflux antiporter
Medtr8g076080	-0.847585	0.00217269	0.0424897	zinc finger (CCCH-type) family protein, putative
Medtr4g122900	-0.846291	0.00245185	0.0445395	hypothetical protein
Medtr2g008980	-0.843272	0.00228073	0.0432412	ICE-like protease (caspase) p20 domain protein
Medtr3g092500	-0.833708	0.00217862	0.0424897	ABC transporter C family-like protein, putative
Medtr4g134510	-0.832307	0.00102444	0.0316665	PHD finger alfin-like protein
Medtr3g084520	-0.826911	0.000587741	0.0266563	flavonoid glucosyltransferase
Medtr7g011820	-0.824487	0.000758464	0.0284992	WRKY transcription factor 3
Medtr6g045467	-0.822352	0.00072669	0.0284992	DUF21 domain plant protein
Medtr6g088460	-0.820005	0.00108581	0.0324282	hypothetical protein
Medtr4g009920	-0.81856	0.00255073	0.0453331	glycerol kinase-like protein
Medtr2g014950	-0.816243	0.000926296	0.0305678	28 kDa heat-and acid-stable phosphoprotein-like protein
Medtr4g084280	-0.814481	0.000568198	0.0261643	calcium-dependent lipid-binding (CaLB domain) family protein
Medtr8g028630	-0.811803	0.00190786	0.0409631	erythronate-4-phosphate dehydrogenase family protein
Medtr8g012590	-0.808072	0.000939515	0.0305678	cytochrome P450 family protein
Medtr7g068280	-0.807689	0.00045695	0.0245279	high mobility group (HMG)-box protein
Medtr6g008530	-0.807317	0.00122464	0.0337173	cytochrome P450 family protein
Medtr8g031100	-0.806218	0.00112893	0.0327937	AT hook motif DNA-binding family protein
Medtr8g023830	-0.803256	0.00241749	0.0444648	endonuclease/exonuclease/phosphatase family protein
Medtr2g082640	-0.8023	0.00130975	0.0345493	BHLH domain class transcription factor
Medtr4g068457	-0.799888	0.00117011	0.0333847	transducin/WD40 repeat protein
Medtr7g108825	-0.791819	0.00177551	0.0396853	epoxide hydrolase
Medtr8g446930	-0.789435	0.000695733	0.0284946	zinc finger CCCH domain protein
Medtr2g018125	-0.789022	0.00303598	0.0487373	subtilisin-like serine protease
Medtr8g041150	-0.786737	0.00167829	0.0383277	LRR receptor-like kinase family protein
Medtr3g111840	-0.786212	0.00263452	0.0456324	leucine carboxyl methyltransferase
Medtr4g015590	-0.784684	0.00104821	0.031935	pyridoxal biosynthesis protein PDX2
Medtr7g108820	-0.777741	0.00242093	0.0444648	phytochrome A-associated F-box protein, putative
Medtr2g067080	-0.777031	0.00148797	0.0365232	thiosulfate/3-mercaptopyruvate sulfurtransferase
Medtr2g010750	-0.776691	0.00111562	0.0327531	thioredoxin
Medtr8g074030	-0.77449	0.0028441	0.0471158	NAD-dependent isocitrate dehydrogenase
Medtr4g098850	-0.773941	0.00105607	0.0320003	type I inositol-1,4,5-trisphosphate 5-phosphatase
Medtr3g065930	-0.773612	0.0014794	0.0365232	5'-AMP-activated kinase-like protein, putative
Medtr3g479510	-0.769069	0.00223291	0.0427252	disease resistance protein (TIR-NBS-LRR class)
Medtr4g091060	-0.768117	0.00256068	0.0453984	riboflavin kinase/fmn hydrolase
Medtr3g089020	-0.767571	0.00179532	0.0398661	RNA-metabolising metallo-beta-lactamase
Medtr4g064963	-0.763725	0.00105201	0.0319592	Ctr family copper transporter
Medtr0148s0080	-0.762023	0.00177686	0.0396853	S-locus lectin kinase family protein
Medtr1g107350	-0.753913	0.00091666	0.0305678	limonoid UDP-glucosyltransferase-like protein
Medtr4g105600	-0.744378	0.00213484	0.0421292	transmembrane protein, putative
Medtr1g009200	-0.74063	0.00108159	0.0323973	peptide/nitrate transporter plant
Medtr7g451010	-0.738757	0.00196418	0.0414421	dynamin-like protein 1E
Medtr7g092860	-0.729013	0.000986271	0.03119	adenylosuccinate lyase
Medtr1g116210	-0.727827	0.00129214	0.0344618	casein kinase I-like protein
Medtr8g098400	-0.726988	0.00195529	0.0413644	phospholipid hydroperoxide glutathione peroxidase
Medtr3g096830	-0.724485	0.00244665	0.0445395	transmembrane amino acid transporter family protein
Medtr7g058500	-0.719622	0.00158984	0.0371366	UPF0420 C16orf58-like protein
Medtr4g131390	-0.71481	0.00192321	0.0410469	temperature-induced lipocalin
Medtr2g081810	-0.714076	0.00121036	0.0337173	quinone oxidoreductase
Medtr3g092020	-0.707374	0.00263875	0.0456324	F-box-like protein
Medtr7g110060	-0.707192	0.0030921	0.0492228	glycogen synthase kinase
Medtr1g101870	-0.70497	0.00220876	0.0426773	elongation factor 1-alpha
Medtr1g076430	-0.699672	0.00126737	0.0344232	3-ketoacyl-CoA synthase-like protein
Medtr8g070890	-0.698602	0.00157666	0.0369413	leucine-rich receptor-like kinase family protein
Medtr3g100960	-0.694806	0.00292663	0.0479541	processing peptidase
Medtr3g094080	-0.691517	0.00312788	0.0495462	hypothetical protein
Medtr2g086600	-0.681105	0.00212599	0.0421292	N-carbamoylputrescine amidohydrolase, putative
Medtr1g016970	-0.678161	0.00204513	0.0417901	3'-5' exonuclease
Medtr7g022470	-0.66881	0.0025986	0.0454989	four ACT domain ACT domain protein which protein
Medtr7g111050	-0.664875	0.00284704	0.0471158	cathepsin B-like cysteine protease
Medtr4g011340	-0.662507	0.00270773	0.0462019	cytochrome C oxidase subunit 5b
Medtr4g471590	-0.66033	0.00260966	0.0454989	GATA type zinc finger transcription factor family protein
Medtr8g085630	-0.652479	0.00221558	0.0426773	neutral amino acid transporter
Medtr6g088790	-0.647939	0.00129389	0.0344618	leucine-rich receptor-like kinase family protein
Medtr4g084120	-0.646426	0.00209512	0.0418442	secondary thiamine-phosphate synthase enzyme
Medtr1g034030	-0.644614	0.00256177	0.0453984	sucrose nonfermenting 1(SNF1)-related kinase
Medtr8g056100	-0.641887	0.00296367	0.0483387	fatty acid/sphingolipid desaturase
Medtr3g008260	-0.641667	0.00120374	0.0337173	ceramide kinase-like protein
Medtr1g041890	-0.638875	0.00258138	0.0454989	peptide chain release factor, putative
Medtr4g029010	-0.638035	0.00284633	0.0471158	transcription factor TFIID protein
Medtr1g116540	-0.63664	0.00217687	0.0424897	hypothetical protein
Medtr8g070910	-0.636349	0.00246571	0.0445812	receptor-like kinase
Medtr1g041390	-0.634894	0.00227727	0.0432412	chlorophyllase enzyme
Medtr1g112270	-0.632335	0.00181635	0.0400556	C2H2 zinc finger protein, putative
Medtr8g019320	-0.630197	0.00213106	0.0421292	heme oxygenase 1 protein
Medtr6g007647	-0.6278	0.00305981	0.0489519	homeobox associated leucine zipper protein
Medtr4g068880	-0.626326	0.00191581	0.0409799	plastid division protein PDV2, putative
Medtr5g009830	-0.625231	0.00236974	0.0440716	calmodulin-domain kinase CDPK protein
Medtr6g015780	-0.620709	0.00221931	0.0426773	RALF
Medtr3g022930	-0.620279	0.00298166	0.0484615	disease resistance protein (TIR-NBS-LRR class)
Medtr3g112150	-0.602446	0.00300492	0.0486812	Sec14p-like phosphatidylinositol transfer family protein
Medtr3g067685	-0.585155	0.00320165	0.0499999	armadillo/beta-catenin repeat protein
Medtr2g089975	-0.585139	0.00235321	0.0439769	disease resistance protein (CC-NBS-LRR class) family protein
Medtr3g040090	-0.580866	0.00219149	0.0425578	ABC-type transport system protein
Medtr5g009360	-0.560098	0.00295867	0.0482982	long-chain fatty acyl CoA ligase
Medtr1g029520	-0.555315	0.00315404	0.0495525	four ACT domain ACT domain protein which protein
Medtr2g027270	-0.499232	0.00278959	0.0467281	phosphoglycolate phosphatase-like protein
Medtr2g018310	0.508292	0.00261765	0.0454989	thioredoxin family Trp26 protein
Medtr1g069720	0.511252	0.00320592	0.0499999	casein kinase I-like protein
Medtr4g121020	0.546877	0.00311021	0.0494213	two-component response regulator ARR2-like protein
Medtr3g100050	0.548741	0.00214959	0.0422234	GATA transcription factor
Medtr4g082940	0.552923	0.00302351	0.0487373	inactive purple acid phosphatase-like protein
Medtr3g084510	0.565976	0.00292762	0.0479541	LRR receptor-like kinase
Medtr4g055080	0.567937	0.00250943	0.0449314	histone deacetylase family protein
Medtr8g028080	0.57138	0.00222383	0.0426788	ribonuclease T2 family protein
Medtr4g109890	0.58489	0.00282163	0.0469804	CAZy family GT8 glycosyltransferase
Medtr7g031450	0.59083	0.00135109	0.0350627	tplate-like protein
Medtr1g026590	0.595452	0.00254393	0.0452552	nucleotide/sugar transporter family protein
Medtr4g086600	0.59769	0.00302668	0.0487373	polyadenylate-binding protein RBP47B
Medtr2g037880	0.603384	0.0016905	0.0384769	A49-like RNA polymerase I associated factor
Medtr7g090740	0.612311	0.00233673	0.0438393	elongation defective 1 protein/ELD1 protein
Medtr5g004960	0.632059	0.00197141	0.0414421	DNA repair protein REV1
Medtr4g058990	0.634386	0.00202134	0.0416938	double-stranded RNA-binding motif protein
Medtr8g088930	0.634454	0.00241758	0.0444648	phosphatidylinositol-4-phosphate 5-kinase family protein
Medtr6g071995	0.649593	0.00259034	0.0454989	histidine decarboxylase-like protein
Medtr4g077910	0.651894	0.00267977	0.046057	cellulose synthase-like protein
Medtr4g098640	0.652081	0.00190423	0.0409631	ubiquitin family protein
Medtr2g008120	0.655408	0.00138284	0.0352212	serine decarboxylase
Medtr8g038880	0.655968	0.00160727	0.0372833	peptide/nitrate transporter plant
Medtr4g057795	0.657277	0.00307863	0.0491304	ABC transporter family protein
Medtr6g033130	0.658962	0.000965555	0.0308795	octicosapeptide/phox/Bem1p domain kinase superfamily protein
Medtr8g027425	0.665749	0.00124116	0.0339028	transducin family protein/WD-40 repeat protein
Medtr2g065470	0.668516	0.0028706	0.0472616	glyceraldehyde-3-phosphate dehydrogenase
Medtr5g043800	0.669755	0.00118194	0.033486	LRR receptor-like kinase
Medtr3g117580	0.679274	0.00159908	0.0372421	tRNA-dihydrouridine synthase
Medtr7g072680	0.679634	0.00148187	0.0365232	transmembrane protein, putative
Medtr1g097110	0.679705	0.00121951	0.0337173	phosphatidylinositol-4-phosphate 5-kinase family protein
Medtr8g015980	0.683498	0.00233498	0.0438393	ABC transporter-like family-protein
Medtr2g094130	0.692586	0.00229404	0.0433769	RING/U-box protein
Medtr4g064897	0.694042	0.00213699	0.0421292	RAB GTPase-like protein A1D
Medtr1g023760	0.696403	0.000984391	0.0311859	IQ calmodulin-binding motif protein
Medtr5g012060	0.696526	0.00244731	0.0445395	squalene/phytoene synthase
Medtr1g099420	0.699134	0.0013601	0.0351543	CAAX amino terminal protease family protein
Medtr3g462330	0.703104	0.00270216	0.0461596	RNA-binding (RRM/RBD/RNP motif) family protein
Medtr8g022050	0.704804	0.00155963	0.0369356	nucleolysin TIAR-like protein
Medtr4g113270	0.706799	0.00169274	0.0384769	nucleotide-sugar transporter
Medtr2g102283	0.708401	0.00185395	0.040421	group 1 family glycosyltransferase
Medtr8g095280	0.711596	0.001906	0.0409631	ENTH/VHS/GAT family protein
Medtr4g114160	0.713855	0.00246638	0.0445812	FkbM family methyltransferase
Medtr8g076890	0.714068	0.00247184	0.0445812	thioredoxin-like/ATP-binding protein
Medtr4g025410	0.715644	0.00128339	0.0344618	S-adenosylmethionine-dependent methyltransferase, putative
Medtr2g005260	0.717085	0.00234666	0.0438972	transmembrane protein, putative
Medtr1g107500	0.717786	0.00207366	0.0418414	LRR receptor-like kinase family protein
Medtr8g107470	0.718066	0.00124036	0.0339028	LRR receptor-like kinase
Medtr8g072360	0.733886	0.00113643	0.0328132	GDA1/CD39 nucleoside phosphatase family protein
Medtr2g026130	0.737622	0.00301818	0.0487373	armadillo/beta-catenin-like repeat protein
Medtr4g124660	0.740337	0.00319877	0.0499999	sucrose synthase
Medtr8g073250	0.741294	0.00161853	0.0373926	Serine/Threonine kinase family protein
Medtr5g058140	0.742066	0.00301611	0.0487373	emp24/gp25L/p24 family protein
Medtr6g022320	0.742654	0.00133171	0.0348542	peptidyl serine alpha-galactosyltransferase
Medtr4g019165	0.758582	0.00238658	0.0442565	pfkB family carbohydrate kinase
Medtr8g010320	0.761868	0.00156261	0.0369413	Defensin-like protein
Medtr3g010260	0.763042	0.00309159	0.0492228	Serine/Threonine-kinase KIPK-like protein
Medtr8g015500	0.763529	0.00241384	0.0444648	core-2/I-branching enzyme
Medtr5g025560	0.771207	0.00146764	0.0364474	F-box SKIP31-like protein
Medtr8g070000	0.780527	0.000914683	0.0305678	isoprenylcysteine alpha-carbonyl methylesterase ICME protein
Medtr2g009360	0.780994	0.000751454	0.0284992	transcription factor
Medtr0009s0480	0.782101	0.00232669	0.0438275	2OG-Fe(II) oxygenase family oxidoreductase
Medtr7g117870	0.782522	0.000855347	0.0300701	L-fucokinase/GDP-L-fucose pyrophosphorylase
Medtr3g037560	0.787223	0.00161683	0.0373926	galactoside 2-alpha-L-fucosyltransferase-like protein
Medtr6g086115	0.791021	0.00113535	0.0328132	LRR extensin-like protein
Medtr7g081665	0.792829	0.00269936	0.0461596	Serine/Threonine kinase family protein
Medtr8g089840	0.796068	0.000598281	0.0268181	beta-1,4-N-acetylglucosaminyltransferase-like protein
Medtr1g086600	0.797423	0.00199237	0.0415996	long-chain fatty acyl CoA ligase
Medtr8g099605	0.807237	0.00306738	0.0490308	FTSH extracellular protease family protein
Medtr4g094572	0.813574	0.000775985	0.0287188	S-adenosyl-L-methionine-dependent methyltransferase
Medtr5g026680	0.816772	0.00157536	0.0369413	ribonuclease P protein subunit P38, related protein
Medtr8g023490	0.819898	0.00104169	0.0318469	GDP-fucose protein O-fucosyltransferase
Medtr8g023560	0.826165	0.00239616	0.0443717	strubbelig-receptor family 6 protein
Medtr1g081180	0.826682	0.00258874	0.0454989	trihelix transcription factor
Medtr3g064500	0.827667	0.0024418	0.0445395	myb transcription factor
Medtr2g027140	0.828683	0.00065785	0.0276211	SEC14 cytosolic factor-like protein
Medtr2g043250	0.830353	0.000327332	0.0217998	auxin response factor 2
Medtr7g093260	0.832849	0.000868685	0.0301531	actin-97
Medtr1g029790	0.833711	0.0024528	0.0445395	armadillo/beta-catenin-like repeat protein
Medtr4g077250	0.835152	0.00182267	0.0400987	transmembrane protein, putative
Medtr4g108140	0.835246	0.000531446	0.0255492	IQ calmodulin-binding motif protein
Medtr3g062610	0.836405	0.000897557	0.0305678	Mn-specific cation diffusion facilitator transporter MTP8.1
Medtr7g055600	0.839434	0.0031252	0.0495445	glycosyltransferase Quasimodo protein, putative
Medtr2g022180	0.845008	0.000901736	0.0305678	TVP38/TMEM64 family membrane slr0305-like protein
Medtr1g009960	0.845486	0.000874527	0.0302467	core-2/I-branching enzyme
Medtr2g084715	0.849514	0.00112331	0.0327788	splicing factor U2af small subunit A-like protein
Medtr1g075790	0.851099	0.00274783	0.0463567	hypothetical protein
Medtr7g075120	0.852266	0.00188627	0.0407727	hypothetical protein
Medtr8g010160	0.85441	0.000469108	0.0245802	ABI3-interacting protein
Medtr7g096090	0.855147	0.00236322	0.0440594	auxin-responsive AUX/IAA family protein
Medtr7g068440	0.857141	0.0017048	0.038614	LIMR family protein
Medtr2g020360	0.860214	0.000283894	0.0209081	acyl carrier protein
Medtr7g085090	0.86118	0.000660665	0.0276789	GDA1/CD39 nucleoside phosphatase family protein
Medtr2g044070	0.861262	0.0016145	0.0373926	sucrose synthase
Medtr2g096160	0.866678	0.00221906	0.0426773	receptor-like kinase, putative
Medtr1g076690	0.870384	0.00127362	0.0344521	trichome birefringence-like protein
Medtr3g055330	0.870776	0.0027365	0.0463335	SWIB/MDM2 domain protein
Medtr1g113850	0.872969	0.00208632	0.0418442	mechanosensitive ion channel family protein
Medtr5g004720	0.880111	0.0017724	0.0396853	DNA repair and recombination RAD54-like protein
Medtr3g107520	0.882609	0.00202475	0.0416938	cellulose synthase-like protein
Medtr0019s0020	0.889462	0.000668969	0.0278412	ABC transporter family protein
Medtr5g033320	0.890591	0.00133218	0.0348542	multidrug resistance protein ABC transporter family protein
Medtr0291s0010	0.89288	0.000928429	0.0305678	calcium-dependent lipid-binding (CaLB domain) family protein
Medtr1g084100	0.896519	0.000816023	0.0293311	TPR domain protein
Medtr2g099490	0.898867	0.00252859	0.0451903	CCAAT-binding transcription factor
Medtr3g104940	0.899048	0.00231832	0.0437839	mechanosensitive ion channel family protein
Medtr5g083150	0.900736	0.00255752	0.0453984	methyltransferase PMT16, putative
Medtr8g098290	0.902368	0.00137215	0.0352022	bromo-adjacent-like (BAH) domain protein
Medtr5g016600	0.903018	0.00193986	0.041199	beta-1,4-xylosyltransferase, putative
Medtr2g100110	0.907392	0.00127124	0.0344521	beta-galactosidase
Medtr5g067470	0.911353	0.00302768	0.0487373	sucrose transporter
Medtr4g050410	0.922194	0.000863021	0.0301105	LRR and NB-ARC domain disease resistance protein
Medtr6g042530	0.931116	0.00121429	0.0337173	Ran-binding protein 2, Ran-binding domain protein
Medtr7g015950	0.937125	0.000968085	0.0308795	COBRA-like protein 2 precursor
Medtr7g079510	0.94104	0.000593093	0.0267867	transmembrane protein, putative
Medtr8g085780	0.946313	0.00144166	0.0359574	calcium ion-binding protein
Medtr2g035820	0.948603	0.00157645	0.0369413	S-adenosylmethionine-dependent methyltransferase, putative
Medtr4g073080	0.955092	0.000721962	0.0284992	nucleosome/chromatin assembly factor group protein
Medtr1g046740	0.958056	0.000254667	0.0203977	core-2/I-branching enzyme
Medtr8g092190	0.958535	0.00273712	0.0463335	nucleotide/sugar transporter family protein
Medtr1g107135	0.96311	0.00102345	0.0316665	alpha-L-fucosidase-like protein
Medtr8g021310	0.972844	0.00182962	0.040164	lung seven transmembrane receptor family protein
Medtr1g075900	0.974438	0.00205083	0.0417901	S-adenosylmethionine-dependent methyltransferase, putative
Medtr4g134190	0.975905	0.00214128	0.0421292	C2 and GRAM domain plant-like protein
Medtr2g069340	0.978213	0.000526191	0.0254878	mitotic spindle assembly checkpoint MAD2B-like protein
Medtr4g121880	0.979187	0.000197496	0.019241	dihydrolipoamide dehydrogenase
Medtr3g086000	0.979743	0.00272708	0.0462858	zincin-like metalloprotease family protein
Medtr1008s0010	0.984024	0.000427932	0.0240804	ABC transporter C family protein
Medtr1g067530	0.986321	0.000322536	0.0217627	UDP-glucuronic acid decarboxylase
Medtr3g030040	0.991496	0.000445919	0.0244086	cellulose synthase-like protein
Medtr6g004020	0.998348	0.000621774	0.0269021	pyruvate kinase family protein
Medtr3g449620	1.00174	0.000304507	0.0213711	polyamine oxidase-like protein
Medtr5g068770	1.00646	0.000901292	0.0305678	lectin-like receptor kinase, putative
Medtr2g090120	1.01246	0.00193394	0.0411391	strubbelig receptor family protein
Medtr1g107295	1.01258	0.00303485	0.0487373	cytochrome P450 family flavone synthase
Medtr1g021040	1.01456	0.000720775	0.0284992	transcription factor
Medtr5g077770	1.01478	0.000961959	0.0308795	potassium outward rectifying channel protein
Medtr4g074200	1.01639	0.00261398	0.0454989	X-ray repair cross complementing 2 (XRCC2)-like protein, putative
Medtr2g070070	1.02151	0.00117296	0.0334163	glutathione S-transferase, amino-terminal domain protein
Medtr6g046960	1.02509	0.00221362	0.0426773	nucleotide-diphospho-sugar transferase superfamily protein
Medtr8g024260	1.03365	0.00142007	0.0356501	PRR response regulator
Medtr8g102500	1.04341	0.000819634	0.0293511	nucleotide-diphospho-sugar transferase domain protein
Medtr5g067670	1.04412	0.000751523	0.0284992	lung seven transmembrane receptor family protein
Medtr1g070190	1.04562	0.00186225	0.0405103	HR-like lesion-inducing protein
Medtr1g054675	1.05557	0.000361676	0.0224356	RNA recognition motif
Medtr4g058970	1.05633	0.00206949	0.0418414	class III homeodomain leucine zipper protein
Medtr4g123910	1.05937	0.000379958	0.0228436	putative plant SNARE-like protein
Medtr2g028620	1.06186	0.0021294	0.0421292	cinnamoyl-CoA reductase
Medtr6g478120	1.06459	0.00141999	0.0356501	eukaryotic peptide chain release factor subunit 1-3
Medtr8g098260	1.06586	0.00123564	0.0338556	transcription factor S-II, central domain protein
Medtr7g026520	1.066	0.000212344	0.0192612	transmembrane protein, putative
Medtr8g037270	1.07592	0.00270033	0.0461596	CCAAT-binding transcription factor
Medtr5g024780	1.0775	0.000177593	0.0182434	plant intracellular ras group-related LRR protein
Medtr4g070270	1.0775	0.000299012	0.0212963	3-ketoacyl-CoA synthase
Medtr2g006330	1.07897	0.00221785	0.0426773	sucrose non-fermenting-like kinase 2 family protein
Medtr5g091900	1.08101	0.0018649	0.0405221	transmembrane protein, putative
Medtr2g100400	1.08644	0.000558633	0.0260108	MFS transporter
Medtr7g077800	1.0866	0.000358258	0.0224356	signal peptide peptidase-like protein
Medtr6g087910	1.08744	0.00106189	0.0320003	sugar porter (SP) family MFS transporter
Medtr1g054335	1.09044	0.00288184	0.0473252	ubiquitin ligase SINAT3
Medtr8g071280	1.09288	0.000288917	0.0209592	methyltransferase PMT16, putative
Medtr5g045310	1.10283	0.000113741	0.017207	spiral1 [Source:Projected from Arabidopsis thaliana (AT2G03680) TAIR;Acc:AT2G03680]
Medtr2g450550	1.1043	0.00160323	0.0372793	transmembrane protein, putative
Medtr4g061833	1.10858	0.000122081	0.017207	receptor-like kinase theseus protein
Medtr3g104120	1.11072	0.00152265	0.0367107	vacuolar processing enzyme
Medtr5g023050	1.11823	0.000530065	0.0255467	phospholipase D alpha 1
Medtr4g122750	1.12026	0.00185163	0.040421	plant invertase/pectin methylesterase inhibitor
Medtr1g071810	1.12191	0.00282175	0.0469804	hypothetical protein
Medtr8g076060	1.12557	0.000512406	0.0250931	peptide methionine sulfoxide reductase family protein
Medtr4g046870	1.13042	0.0011982	0.0336864	hypothetical protein
Medtr4g122270	1.13147	0.000100558	0.017207	DNA replication licensing factor MCM2, putative
Medtr3g464000	1.13193	0.00313501	0.0495525	glycosyltransferase family 90 protein
Medtr2g044600	1.13749	0.000369099	0.0226766	BEST Arabidopsis thaliana protein match is: Mitochondrial import inner membrane translocase subunit Tim17/Tim22/Tim23 family protein (TAIR:AT5G51150.1); Has 323 Blast hits to 315 proteins in 124 species: Archae - 0; Bacteria - 0; Metazoa - 95; Fungi /.../; Plants - 73; Viruses - 0; Other Eukaryotes - 45 (source: NCBI BLink). [Source:Projected from Arabidopsis thaliana (AT1G34630) TAIR;Acc:AT1G346…
Medtr5g016550	1.14094	0.00272298	0.046257	phosphatidylinositol-3,4,5-trisphosphate 3-phosphatase
Medtr1g109060	1.14354	0.00293388	0.0480158	MATE efflux family protein
Medtr4g036110	1.14517	0.00118791	0.0335439	calmodulin-binding protein, putative
Medtr5g020890	1.1475	0.000973115	0.0308795	mannan endo-1,4-beta-mannosidase-like protein
Medtr8g023780	1.15193	0.00116698	0.0333448	inactive purple acid phosphatase-like protein
Medtr4g050400	1.15194	0.000175633	0.0182434	leguminosin group578 secreted peptide
Medtr6g081930	1.15371	0.00138173	0.0352212	late embryogenesis abundant protein
Medtr4g023000	1.15449	0.00304133	0.0487373	glycoside hydrolase family 1 protein
Medtr3g113290	1.15792	0.000431376	0.0241144	filament-plant-like protein
Medtr8g092590	1.16576	0.00181612	0.0400556	cellulose synthase-like protein
Medtr3g098980	1.17368	0.00192178	0.0410469	omega-hydroxypalmitate O-feruloyl transferase
Medtr3g091650	1.17406	0.000288148	0.0209592	ribonuclease P protein subunit P38, related protein, putative
Medtr7g053107	1.19553	0.000994286	0.0312908	DUF538 family protein
Medtr5g033800	1.19877	0.00221893	0.0426773	Pmr5/Cas1p GDSL/SGNH-like acyl-esterase family protein
Medtr2g038720	1.20097	0.000956844	0.030821	GATA type zinc finger transcription factor family protein
Medtr1g090687	1.20143	0.000479212	0.0247563	DUF594 family protein
Medtr4g069770	1.20547	0.00109251	0.0324854	DUF2775 family protein
Medtr5g080700	1.20614	0.00261858	0.0454989	hypothetical protein
Medtr4g088210	1.21179	0.00274731	0.0463567	auxin response factor 3
Medtr8g095490	1.21308	0.00072898	0.0284992	tyrosyl-DNA phosphodiesterase
Medtr2g102150	1.22052	0.00200956	0.0416394	regulator of telomere elongation helicase-like protein
Medtr3g051240	1.22322	0.00272006	0.046257	purple acid phosphatase superfamily protein
Medtr4g063720	1.22499	0.00271424	0.0462311	heat shock cognate 70 kDa protein
Medtr8g040640	1.22544	0.000262864	0.0203977	hypothetical protein
Medtr7g116890	1.22567	0.000965573	0.0308795	bZIP transcription factor family protein
Medtr4g049540	1.22623	0.00184926	0.040421	B-cell receptor-associated-like protein
Medtr4g019800	1.22819	0.000156889	0.0178771	adenine nucleotide alpha hydrolase superfamily protein
Medtr4g107650	1.22996	0.00198845	0.041563	homeobox leucine zipper family protein
Medtr4g077740	1.23521	0.000115383	0.017207	sugar porter (SP) family MFS transporter
Medtr5g083760	1.24121	0.000211369	0.0192612	transmembrane amino acid transporter family protein
Medtr4g063710	1.24803	0.00209548	0.0418442	heat shock cognate 70 kDa protein
Medtr7g117505	1.25132	0.000755101	0.0284992	triacylglycerol lipase-like protein
Medtr1g080800	1.258	0.00261498	0.0454989	Chitinase / Hevein / PR-4 / Wheatwin2
Medtr7g050860	1.26088	0.00174726	0.0392979	tyrosyl-DNA phosphodiesterase
Medtr6g085070	1.26252	0.00236862	0.0440716	alpha/beta hydrolase family protein
Medtr2g094620	1.26623	0.00150913	0.0366386	pleckstrin-like (PH) and lipid-binding START domain protein
Medtr1g019750	1.2666	0.00137106	0.0352022	BRI1 kinase inhibitor 1, putative
Medtr4g006630	1.27178	0.00207082	0.0418414	major intrinsic protein (MIP) family transporter
Medtr5g079860	1.27214	0.000372072	0.0227323	23S rRNA m2A2503 methyltransferase
Medtr7g106760	1.27239	0.00115304	0.0331066	fasciclin-like arabinogalactan protein 16 precursor
Medtr7g067750	1.27391	0.00296923	0.0483474	DUF247 domain protein
Medtr4g133750	1.27494	0.00274963	0.0463567	cytochrome P450 family 71 protein
Medtr7g097060	1.27553	0.00257119	0.0454448	arabinose 5-phosphate isomerase, putative
Medtr1g076470	1.27744	0.00139457	0.0354037	phosphate-responsive 1 family protein
Medtr1g097460	1.27936	0.00261181	0.0454989	hypoxanthine-guanine phosphoribosyltransferase
Medtr4g125010	1.27957	0.00092157	0.0305678	DUF1677 family protein
Medtr3g084110	1.28098	0.000987766	0.03119	sugar porter (SP) family MFS transporter
Medtr7g106210	1.28595	0.000209498	0.0192612	receptor-kinase-like protein
Medtr7g091880	1.28638	0.000638963	0.0272351	galactinol-raffinose galactosyltransferase
Medtr5g020510	1.28638	0.00191289	0.0409631	homeobox domain, ZF-HD class protein
Medtr4g092590	1.28812	0.00232856	0.0438275	branched-chain amino acid aminotransferase
Medtr5g017290	1.28973	0.00243721	0.0445395	carboxy-terminal region remorin
Medtr7g112760	1.29941	0.000455613	0.0245279	pre-mRNA-splicing factor SF2-like protein
Medtr2g024120	1.29952	0.00112709	0.0327896	core-2/I-branching enzyme
Medtr6g069830	1.29997	0.00253572	0.0452231	Uncharacterized protein At3g17950 [Source:Projected from Arabidopsis thaliana (AT3G17950) UniProtKB/Swiss-Prot;Acc:Q6DR24]
Medtr4g107940	1.30004	0.000936447	0.0305678	delta-1-pyrroline-5-carboxylate dehydrogenase
Medtr5g075060	1.30526	0.000292565	0.0210713	CBL-interacting kinase
Medtr0196s0020	1.31113	0.000340149	0.0219121	multidrug resistance-associated protein ABC domain protein
Medtr5g007050	1.31222	0.00122736	0.0337173	nucleotide-diphospho-sugar transferase superfamily protein
Medtr5g036580	1.31344	0.000971828	0.0308795	CAZy family GT8 glycosyltransferase
Medtr8g072000	1.32072	0.000231587	0.0196348	pectinacetylesterase family protein
Medtr5g044540	1.32492	0.000223341	0.0195898	alpha/beta fold hydrolase
Medtr3g012320	1.32955	0.00197327	0.0414421	cytochrome P450 family protein
Medtr4g120730	1.33188	0.000865893	0.0301105	polygalacturonase/glycoside hydrolase family protein
Medtr7g081200	1.33803	0.00302592	0.0487373	peptidyl-prolyl cis-trans isomerase
Medtr1g083400	1.34065	0.00042975	0.0240936	pre-mRNA-splicing factor SF2-like protein
Medtr1g442840	1.34216	0.000745202	0.0284992	S-adenosylmethionine-dependent methyltransferase, putative
Medtr2g067640	1.34446	0.00185263	0.040421	DUF946 family protein
Medtr4g075500	1.34774	0.000136009	0.017207	transmembrane protein, putative
Medtr3g073100	1.34788	0.00101148	0.0315758	phosphatidylinositol-4-phosphate 5-kinase family protein
Medtr7g099270	1.35209	0.00150499	0.0366386	pfkB family carbohydrate kinase
Medtr4g129820	1.35546	0.000439915	0.0243091	UDP-D-glucuronate 4-epimerase
Medtr4g126270	1.35692	4.3859e-05	0.0163938	receptor-like Serine/Threonine-kinase ALE2-like protein, putative
Medtr1g095070	1.36119	0.00314812	0.0495525	major intrinsic protein (MIP) family transporter
Medtr8g093840	1.36603	0.00295597	0.048295	white-brown-complex ABC transporter family protein
Medtr4g097790	1.37297	3.51986e-05	0.0163938	transmembrane protein, putative
Medtr5g012900	1.37431	0.00196153	0.0414421	DNA mismatch repair MSH4-like protein, putative
Medtr7g072605	1.38436	0.000495421	0.0249309	CBL-interacting kinase
Medtr5g042990	1.38601	0.000509417	0.025054	eukaryotic translation initiation factor 5A4
Medtr4g024600	1.3916	6.92884e-05	0.017207	UDP-D-glucuronate 4-epimerase
Medtr2g028940	1.39227	0.00133908	0.0348695	E3 ubiquitin-protein ligase LIN-like protein, putative
Medtr6g452990	1.39294	0.000500292	0.0250537	heat shock protein 81-2
Medtr2g025160	1.39538	0.000772989	0.0287101	extracellular ligand-gated ion channel protein
Medtr7g073660	1.39586	3.75938e-05	0.0163938	feronia receptor-like kinase
Medtr1g101130	1.39838	0.000773366	0.0287101	tubulin beta-1 chain
Medtr4g118590	1.4067	0.0024483	0.0445395	inosine-uridine preferring nucleoside hydrolase
Medtr2g028480	1.41722	0.000208867	0.0192612	membrane-anchored endo-1,4-beta-glucanase
Medtr3g113210	1.41799	0.00209224	0.0418442	glyoxal oxidase amino-terminal protein
Medtr3g116860	1.41954	0.00268461	0.0460938	glucose-1-phosphate adenylyltransferase family protein
Medtr7g012260	1.42075	0.000657091	0.0276211	cyclic nucleotide-gated ion channel protein, putative
Medtr5g023680	1.42346	0.00130037	0.0345388	cytochrome P450 family 71 protein
Medtr7g021130	1.42596	0.00205859	0.0418039	serine carboxypeptidase-like protein
Medtr4g127770	1.42904	0.0030317	0.0487373	lysine-tRNA ligase-like protein
Medtr3g054010	1.43321	0.00243443	0.0445395	extracellular ligand-gated ion channel protein
Medtr7g021640	1.43322	0.00146889	0.0364474	Nodule Cysteine-Rich (NCR) secreted peptide
Medtr7g100590	1.43724	0.000496513	0.0249309	AP2 domain transcription factor
Medtr1g025560	1.4407	0.000711823	0.0284992	ABC transporter B family protein
Medtr7g088790	1.44401	0.000507221	0.025054	peptide/nitrate transporter
Medtr0004s0650	1.45214	0.000375436	0.022784	glycerol-3-phosphate transporter
Medtr8g075010	1.45378	0.0024211	0.0444648	eukaryotic aspartyl protease family protein
Medtr4g129560	1.45384	0.00271054	0.0462089	sequence-specific DNA-binding transcription factors protein, putative
Medtr4g058740	1.45463	0.000624264	0.0269021	lysine decarboxylase family protein
Medtr7g100430	1.45502	0.00039097	0.0230317	ankyrin repeat plant-like protein
Medtr8g075140	1.4619	0.00238004	0.0441777	embryo defective 3006 protein, putative
Medtr5g083750	1.46591	0.00128558	0.0344618	alpha-soluble NSF attachment protein
Medtr4g102380	1.48617	0.00265138	0.0458095	myb transcription factor
Medtr2g010160	1.48803	0.00215375	0.0422619	octicosapeptide/phox/Bem1p (PB1) domain protein
Medtr8g101540	1.48989	0.00202415	0.0416938	galactokinase
Medtr1g013440	1.49075	0.00256788	0.0454281	39S ribosomal protein L53/MRP-L53
Medtr3g108240	1.49143	0.00039304	0.0230317	CHY and CTCHY and RING-type zinc finger protein
Medtr7g111600	1.49407	5.2276e-05	0.0163938	carbohydrate-binding X8 domain protein
Medtr7g005910	1.50153	8.21061e-05	0.017207	MFS/sugar transporter
Medtr4g099130	1.50464	0.000383677	0.0228436	receptor-like kinase plant
Medtr7g100730	1.50844	0.00282102	0.0469804	interactor of constitutive active ROPs-like protein
Medtr4g073530	1.50852	0.000425681	0.024076	senescence/dehydration-associated-like protein
Medtr7g111350	1.50957	0.00269047	0.0461531	low temperature and salt responsive family protein
Medtr5g032660	1.51034	0.00317044	0.0497288	dihydrofolate reductase-like protein
Medtr5g062320	1.52202	0.000815521	0.0293311	glycoside hydrolase family 3 amino-terminal domain protein
Medtr5g041380	1.52279	0.000694538	0.0284946	DOF domain, zinc finger protein
Medtr5g088990	1.52558	0.000192034	0.0189873	plastocyanin-like domain protein
Medtr1g103070	1.52691	0.00134909	0.0350581	IQ calmodulin-binding motif protein
Medtr5g077850	1.5302	0.000236405	0.0197655	eukaryotic aspartyl protease family protein
Medtr8g101260	1.54653	0.00155567	0.0368871	LRR receptor-like kinase
Medtr5g080680	1.55197	0.000569975	0.0261643	protein phosphatase 2C-like protein
Medtr7g059405	1.55484	0.00102684	0.0316665	armadillo/beta-catenin repeat protein
Medtr3g068200	1.55489	0.00115348	0.0331066	protein phosphatase 2C-like protein
Medtr4g129020	1.55837	0.00147269	0.0364947	transmembrane protein
Medtr3g053220	1.56665	0.00182456	0.0400987	1,4-alpha-glucan-branching enzyme/amyloplastic protein
Medtr2g085065	1.56668	0.000313854	0.021555	Serine/Threonine kinase family protein
Medtr3g031830	1.56716	0.000769773	0.0287101	DUF640 family protein
Medtr1g033130	1.56812	0.00260115	0.0454989	pollen protein Ole E I-like protein
ENSRNA049473804	1.57874	0.00128098	0.0344521	Eukaryotic small subunit ribosomal RNA
Medtr5g076960	1.58509	0.000222978	0.0195898	myb transcription factor
Medtr2g025180	1.58796	0.000956258	0.030821	calcium-binding EF hand protein
Medtr3g069720	1.59055	0.00133784	0.0348695	lipase
Medtr1g088480	1.59069	0.000895549	0.0305678	UDP-glucuronic acid decarboxylase-like protein
Medtr5g094850	1.59237	0.00150509	0.0366386	hypothetical protein
Medtr5g007860	1.60147	0.00082557	0.0294162	pre-mRNA processing protein PRP39, putative
Medtr5g080720	1.60159	0.00270285	0.0461596	methyltransferase PMT16, putative
Medtr8g464760	1.60746	0.00279948	0.0467686	membrane lipoprotein lipid attachment site-like protein, putative
Medtr8g072440	1.60753	0.00279587	0.0467686	subtilisin-like serine protease
Medtr3g096900	1.61166	0.000651732	0.0275061	beta-galactosidase
Medtr3g054130	1.61783	0.000940121	0.0305678	EPS15-like domain protein
Medtr3g088790	1.61924	0.00125797	0.0342161	methyltransferase PMT26-like protein, putative
Medtr1g033080	1.62398	0.00256384	0.0453984	pollen Ole e I family allergen
Medtr6g012450	1.62555	0.000433265	0.0241498	DOF-type zinc finger DNA-binding family protein
Medtr1g050525	1.62828	0.00122046	0.0337173	drug resistance transporter-like ABC domain protein
Medtr7g090160	1.6404	0.000344244	0.0219927	pyrroline-5-carboxylate reductase
Medtr4g107510	1.65197	0.00103396	0.0316665	peptide/nitrate transporter
Medtr3g108080	1.67544	0.00210414	0.0418867	embryo defective 2410 protein
Medtr4g107110	1.67792	0.0022555	0.0430064	microtubule-associated TORTIFOLIA-like protein
Medtr1g033100	1.68736	0.00065225	0.0275061	pollen protein Ole E I-like protein
Medtr4g131020	1.68988	0.000145018	0.0174515	actin-binding FH2 (formin 2) family protein
Medtr8g020510	1.68996	0.000179957	0.0183099	AP2 domain transcription factor
Medtr3g073990	1.69771	0.000316276	0.0215673	pollen Ole e I family allergen
Medtr6g092660	1.70305	0.00315318	0.0495525	homotetrameric cytidine deaminase
Medtr8g080980	1.71289	0.00156592	0.0369413	peptidyl-prolyl cis-trans isomerase FKBP62-like protein
Medtr1g105430	1.71431	0.00052079	0.0253539	P21-Rho-binding domain protein
Medtr4g133938	1.72417	0.000488003	0.0248921	nuclear transcription factor Y protein
Medtr3g039990	1.72566	0.000793928	0.0289517	R2R3-myb transcription factor
Medtr1g026750	1.72624	0.000793544	0.0289517	peptide/nitrate transporter plant
Medtr1g043760	1.72828	0.00209874	0.041866	1-aminocyclopropane-1-carboxylate oxidase
Medtr4g104760	1.73824	0.00181592	0.0400556	protein phosphatase 2c, putative
Medtr3g099010	1.74722	0.00154637	0.0368484	TB2/DP1, HVA22 family protein
Medtr5g017800	1.75982	0.000376771	0.022784	transducin/WD40 repeat protein
Medtr8g027900	1.81726	0.0010914	0.0324854	Pmr5/Cas1p GDSL/SGNH-like acyl-esterase family protein
Medtr7g068290	1.82469	0.00121651	0.0337173	zinc finger, C3HC4 type (RING finger) protein
Medtr1g009030	1.82843	0.000154839	0.0178297	plant/F12B17-70 protein
Medtr4g096690	1.83124	0.000350315	0.0222329	3-oxoacyl-(acyl carrier) synthase II
Medtr5g098060	1.8336	0.000269154	0.0204578	fasciclin-like arabinogalactan protein
Medtr3g078270	1.83764	0.000739946	0.0284992	nucleobase-ascorbate transporter-like protein
Medtr5g041400	1.84313	0.000562947	0.0260855	DOF domain, zinc finger protein
Medtr0288s0040	1.84666	0.000123202	0.017207	glycogen/starch/alpha-glucan phosphorylase family protein
Medtr2g022880	1.84696	0.00110089	0.0325279	tobamovirus multiplication-like protein
Medtr5g005430	1.85273	0.000112385	0.017207	transmembrane protein, putative
Medtr5g062370	1.85498	0.00085259	0.0300701	glycoside hydrolase family 3 amino-terminal domain protein
Medtr5g044530	1.85896	1.32686e-05	0.0163938	carbohydrate-binding X8 domain protein
Medtr3g084240	1.86501	0.00237485	0.044124	SAUR-like auxin-responsive family protein
Medtr1g102430	1.86584	6.58478e-05	0.017207	xyloglucan galactosyltransferase KATAMARI-like protein
Medtr7g109210	1.86753	0.000782343	0.0288208	CAZy family GT8 glycosyltransferase
Medtr7g096220	1.87567	0.00042553	0.024076	PRA1 family protein
Medtr2g018780	1.87632	0.000168027	0.0182434	early-responsive to dehydration stress protein (ERD4)
Medtr2g078620	1.87687	0.000132559	0.017207	hypothetical protein
Medtr3g077080	1.8978	1.64688e-05	0.0163938	copper amine oxidase, enzyme domain protein
Medtr7g116910	1.89982	0.000361491	0.0224356	glucose-6-phosphate 1-epimerase-like protein
Medtr8g089180	1.90427	0.000509026	0.025054	UDP-D-glucose/UDP-D-galactose 4-epimerase
Medtr1g090770	1.91193	0.000266684	0.0204284	transmembrane protein, putative
Medtr3g091380	1.92055	0.000929781	0.0305678	pectinesterase/pectinesterase inhibitor
Medtr8g058547	1.93173	0.00298921	0.0484676	E3 ubiquitin-protein ligase BAH1-like protein, putative
Medtr2g038410	1.93237	4.35259e-05	0.0163938	nucleotide-sugar transporter family protein
Medtr4g108890	1.93249	0.000720623	0.0284992	PPR containing plant-like protein
Medtr7g050445	1.94382	0.000217949	0.0195848	SNF2 family amino-terminal protein
Medtr8g059150	1.94419	0.00261414	0.0454989	white-brown-complex ABC transporter family protein
Medtr5g010330	1.94641	0.000320004	0.0217049	AT hook motif DNA-binding family protein
Medtr1g114070	1.94792	0.000551879	0.025971	transcription factor jumonji (JmjC) domain protein
Medtr2g078560	1.94794	0.00203286	0.0416938	peroxidase superfamily protein
Medtr1g037580	1.95237	0.000109283	0.017207	cytochrome P450 family ABA 8'-hydroxylase
Medtr1g024095	1.95548	0.000778081	0.0287188	filament-plant-like protein
Medtr5g064040	1.97286	0.00118286	0.033486	outer arm dynein light chain 1
Medtr6g007110	1.97414	5.34758e-05	0.0163938	kinesin light chain
Medtr7g458880	1.99968	0.000826039	0.0294162	laccase/diphenol oxidase family protein
Medtr4g114120	2.04721	0.00164066	0.0376844	DEAD-box ATP-dependent RNA helicase-like protein
Medtr1g101830	2.04908	0.000167177	0.0182434	peroxidase family protein
Medtr8g078760	2.05163	0.00028184	0.0209081	electron transporter, putative
Medtr8g088110	2.05236	0.000130634	0.017207	cold acclimation protein WCOR413
Medtr0021s0370	2.0579	0.000752054	0.0284992	clavaminate synthase-like plant protein
Medtr5g070360	2.06123	0.000326376	0.0217998	Lipid transfer protein
Medtr2g027560	2.06726	0.000595362	0.0267867	O-glycosyl hydrolase family 17 protein
Medtr1g009750	2.06997	0.00176527	0.0396104	class III peroxidase
Medtr4g065870	2.07433	7.76838e-05	0.017207	transcription factor bHLH122-like protein
Medtr1g098250	2.07766	0.000463746	0.0245279	holocarboxylase synthetase
Medtr0066s0050	2.0785	0.000444956	0.0244086	hemolysin-III-like protein
Medtr4g127700	2.08547	0.00155313	0.0368871	transcription factor/transcription regulator
Medtr4g124320	2.09474	0.000799734	0.0290168	pectinacetylesterase family protein
Medtr3g118160	2.1051	0.000897606	0.0305678	replication factor C subunit, putative
Medtr3g104460	2.10686	0.000617839	0.0269021	chaperonin CPN60-like protein
Medtr2g104120	2.12684	0.000528458	0.0255333	PWWP domain protein
Medtr3g085460	2.16074	0.000613074	0.0269021	ELMO/CED-12 family protein
Medtr2g435340	2.16564	0.000226447	0.0195898	polygalacturonase/glycoside hydrolase family protein
Medtr2g039160	2.17814	0.00303891	0.0487373	amine oxidase
Medtr3g102770	2.18041	0.000158162	0.017891	3-oxo-delta(4,5)-steroid 5-beta-reductase-like protein
Medtr8g106580	2.18918	8.45114e-05	0.017207	late embryogenesis abundant protein
Medtr8g071050	2.19957	0.00203157	0.0416938	transmembrane protein, putative
Medtr1g090657	2.20689	0.000834863	0.0296207	shugoshin protein
Medtr8g090130	2.22769	0.00304735	0.0487932	nucleotide/sugar transporter family protein
Medtr3g087510	2.23476	4.94883e-05	0.0163938	PLAT-plant-stress protein
Medtr5g032670	2.26167	5.10811e-05	0.0163938	hypothetical protein
Medtr8g447000	2.27214	0.00203374	0.0416938	DNA-3-methyladenine glycosylase I
Medtr4g132110	2.2741	0.000819409	0.0293511	cationic peroxidase
Medtr1g087270	2.28196	0.000815405	0.0293311	DNAJ heat shock amino-terminal domain protein
Medtr4g111770	2.29098	0.000106996	0.017207	oleosin
Medtr8g022440	2.30124	0.00155078	0.0368871	SAUR-like auxin-responsive family protein
Medtr2g070120	2.3076	0.000251061	0.0203977	glutathione S-transferase, amino-terminal domain protein
Medtr8g099880	2.32001	0.00315218	0.0495525	basic helix loop helix protein BHLH8
Medtr1g087710	2.34358	0.0021104	0.0419679	DUF761 domain protein
Medtr7g118340	2.3461	0.00228581	0.043264	soluble inorganic pyrophosphatase
Medtr4g115930	2.35919	6.88273e-05	0.017207	RING-H2 zinc finger protein
Medtr7g078730	2.36796	0.000342623	0.0219622	brassinosteroid insensitive 1-associated receptor kinase
Medtr1g017540	2.36999	0.000969556	0.0308795	kinesin motor domain protein
Medtr3g115340	2.38558	0.000123661	0.017207	starch branching enzyme I
Medtr1g094930	2.38685	3.24701e-05	0.0163938	GATA type zinc finger transcription factor family protein
Medtr5g022310	2.38923	0.000209115	0.0192612	pathogenesis-related thaumatin family protein
Medtr2g010250	2.39612	0.00128071	0.0344521	cytochrome P450 family 87 protein
Medtr7g117415	2.40517	0.00187671	0.0406868	ubiquitin ligase SINAT3
Medtr1g053705	2.41259	0.00127936	0.0344521	hypothetical protein
Medtr4g107620	2.4251	0.00117792	0.0334585	LRR receptor-like kinase
Medtr7g086340	2.42665	0.00116672	0.0333448	dehydrin
Medtr5g018270	2.44664	0.00121008	0.0337173	multi-copper oxidase-like protein
Medtr8g076820	2.4496	0.00202539	0.0416938	peroxidase family protein
Medtr2g046740	2.47842	0.000805155	0.0291584	subtilisin-like serine protease
Medtr8g072210	2.48569	0.00182104	0.0400987	long-chain-alcohol oxidase FAO1-like protein
Medtr3g107730	2.48655	0.00163643	0.0376417	boron transporter-like protein
Medtr8g030850	2.51551	0.000620102	0.0269021	RHO guanyl-nucleotide exchange factor
Medtr4g074350	2.51694	0.000742306	0.0284992	delta(24)-sterol reductase-like protein
Medtr5g027510	2.52909	0.000127495	0.017207	ERD (early-responsive to dehydration stress) family protein
Medtr5g009130	2.53002	0.00228158	0.0432412	late embryogenesis abundant hydroxyproline-rich glycoprotein
Medtr5g082910	2.53138	0.000327564	0.0217998	myb transcription factor
Medtr1g077890	2.53188	0.000544866	0.0258946	cystathionine beta-lyase/cystathionine gamma-synthase
Medtr6g086260	2.54885	0.00303629	0.0487373	ARF guanine-nucleotide exchange factor GNOM protein
Medtr8g463140	2.5564	0.000385676	0.0228436	squamosa promoter-binding-like protein
Medtr3g098270	2.56661	0.00267925	0.046057	GDSL-like lipase/acylhydrolase
Medtr8g102550	2.57296	0.000863615	0.0301105	protein phosphatase 2C-like protein
Medtr5g091530	2.57372	0.000428262	0.0240804	ubiquitin carboxyl-terminal hydrolase
Medtr3g107630	2.58485	0.000253403	0.0203977	acyl thioesterase-like protein
Medtr4g069970	2.59695	0.000331401	0.0218248	receptor-like kinase
Medtr7g114860	2.60583	0.001086	0.0324282	Myb/SANT-like DNA-binding domain protein
Medtr8g042710	2.61813	0.00143757	0.0359047	subtilisin-like serine protease
Medtr1g093100	2.62174	0.000640159	0.0272351	xyloglucanase-specific endoglucanase inhibitor protein
Medtr4g073520	2.62713	0.000605777	0.0269021	transmembrane amino acid transporter family protein
Medtr3g084150	2.65733	0.00199472	0.0416035	SAUR-like auxin-responsive family protein
Medtr7g109280	2.65886	0.00152683	0.0367107	hypothetical protein
Medtr6g015995	2.67929	0.0011195	0.0327671	pollen Ole e I family allergen
Medtr4g098630	2.69626	0.000392553	0.0230317	NAC transcription factor-like protein
Medtr1g069470	2.70652	0.00315096	0.0495525	LRR receptor-like kinase family protein
Medtr5g006530	2.70847	9.90761e-06	0.0163938	tesmin/TSO1-like CXC domain protein
Medtr7g016600	2.71574	0.000273982	0.0207428	MADS-box transcription factor
Medtr1g106005	2.71595	1.59002e-05	0.0163938	tubulin beta-1 chain
Medtr8g071920	2.72628	0.000197559	0.019241	nodulin-like/MFS transporter
Medtr3g085180	2.73878	0.000210929	0.0192612	squamosa promoter-binding-like protein
Medtr3g063410	2.75452	6.17278e-05	0.017207	tubulin alpha-1 chain
Medtr5g069740	2.78478	0.00296793	0.0483474	glycoside hydrolase family 3 protein
Medtr6g090535	2.78702	0.000630936	0.0270824	arabinogalactan protein
Medtr2g088770	2.81882	0.0016211	0.0373926	peroxidase family protein
Medtr3g071320	2.81954	0.000552992	0.025971	HXXXD-type acyl-transferase family protein
Medtr4g007250	2.82052	0.00253748	0.0452231	plastocyanin-like domain protein
Medtr1g069805	2.84196	0.00227757	0.0432412	NAC transcription factor-like protein
Medtr8g028060	2.84985	0.000397991	0.0231219	tyrosine/DOPA decarboxylase
Medtr4g124050	2.86271	0.000737968	0.0284992	transporter ABC domain protein
Medtr4g028060	2.87204	0.00278524	0.0466992	cyclin p4
Medtr5g080710	2.87239	0.00122594	0.0337173	F-box/RNI/FBD-like domain protein
Medtr4g128260	2.87684	0.000340702	0.0219121	P-loop nucleoside triphosphate hydrolase superfamily protein
Medtr8g099420	2.88369	0.00133111	0.0348542	long-chain fatty acyl CoA ligase
Medtr3g448360	2.92971	7.3977e-05	0.017207	GDSL-like lipase/acylhydrolase
Medtr5g005420	2.93297	0.000103234	0.017207	DUF1005 family protein
Medtr5g061520	2.94193	0.000738673	0.0284992	glycerol-3-phosphate acyltransferase
Medtr1g057460	2.95132	0.00259572	0.0454989	peptide/nitrate transporter plant
Medtr6g086020	2.9524	0.000220756	0.0195898	heavy metal transport/detoxification superfamily protein
Medtr4g081950	2.96292	0.00207575	0.0418414	expansin-A1-like protein
Medtr4g126330	2.97819	0.000932172	0.0305678	beta-galactosidase
Medtr4g058730	2.99521	0.00013252	0.017207	cyclic nucleotide-gated ion channel protein, putative
Medtr3g077630	3.01342	0.00178819	0.0398049	transmembrane protein, putative
Medtr4g095075	3.04722	0.00148668	0.0365232	metal transporter Nramp3 protein
Medtr4g010130	3.051	0.00157716	0.0369413	sterol regulatory element-binding protein site 2 protease
Medtr8g064180	3.08923	0.000743115	0.0284992	xyloglucan endotransglucosylase/hydrolase family protein
Medtr7g010800	3.09505	3.03191e-05	0.0163938	ATP-dependent zinc metalloprotease FTSH protein
Medtr2g014050	3.10651	0.000893588	0.0305678	late embryogenesis abundant domain protein
Medtr8g009560	3.13361	1.68851e-05	0.0163938	fatty acid hydroxylase superfamily protein
Medtr1g106790	3.13568	7.63369e-05	0.017207	glycosyl hydrolase family 10 protein
Medtr1g113820	3.13858	0.00151642	0.0366941	ankyrin repeat protein
Medtr7g072410	3.17089	0.000512823	0.0250931	regulator of chromosome condensation (RCC1) family protein
Medtr6g034030	3.17871	3.16672e-05	0.0163938	C4-dicarboxylate transporter/malic acid transporter
Medtr5g010150	3.18257	2.11484e-05	0.0163938	major intrinsic protein (MIP) family transporter
Medtr7g012820	3.21406	0.000276738	0.0208693	casein lytic proteinase B3
Medtr0236s0050	3.26977	0.00132453	0.0347959	peptide/nitrate transporter
Medtr7g104190	3.27895	0.000172134	0.0182434	bZIP transcription factor
Medtr3g086630	3.29344	0.000266944	0.0204284	C3HC4-type RING zinc finger protein
Medtr3g074830	3.32968	1.38927e-05	0.0163938	phosphate-responsive 1 family protein
Medtr8g072260	3.34486	0.00253176	0.045205	cytochrome P450 family ABA 8'-hydroxylase
Medtr2g437660	3.36777	8.74254e-05	0.017207	glycosyltransferase family 92 protein
Medtr5g015720	3.38061	4.31237e-05	0.0163938	O-glycosyl hydrolase family 17 protein
Medtr3g093970	3.38461	0.0015303	0.0367107	hypothetical protein
Medtr2g022700	3.39193	0.00189524	0.040904	glucose-6-phosphate/phosphate translocator-like protein
Medtr3g077750	3.39425	0.000697918	0.0284946	Dof domain zinc finger protein
Medtr3g461480	3.42291	0.00139737	0.0354037	transmembrane amino acid transporter family protein
Medtr2g103650	3.42789	0.000256507	0.0203977	polygalacturonase/glycoside hydrolase family protein
Medtr5g064360	3.47037	0.000118988	0.017207	phosphate-responsive 1 family protein
Medtr5g019680	3.52504	0.00151699	0.0366941	homeobox leucine zipper protein
Medtr1g067560	3.57429	0.000259475	0.0203977	copper chaperone
Medtr5g064345	3.58081	8.9467e-05	0.017207	phosphate-responsive 1 family protein
Medtr8g089805	3.62159	0.00311713	0.0494574	GDSL-like lipase/acylhydrolase
Medtr7g108650	3.65793	0.000710584	0.0284992	TSPO/MBR family protein
Medtr3g110205	3.66276	0.000681042	0.0282251	AP2 domain class transcription factor
Medtr6g034055	3.66951	0.000846774	0.0299328	membrane-associated kinase regulator-like protein, putative
Medtr1g018200	3.67567	0.000117977	0.017207	beta-like galactosidase
Medtr7g017790	3.68073	0.000111022	0.017207	hypothetical protein
Medtr4g095280	3.6904	4.98642e-05	0.0163938	hypothetical protein
Medtr8g089190	3.71697	0.00249902	0.0447868	cytochrome P450 family protein
Medtr2g094060	3.74643	2.56663e-05	0.0163938	beta-galactosidase-like protein
Medtr3g020970	3.7501	0.000932331	0.0305678	subtilisin inhibitor 1
Medtr1g083770	3.76358	0.000289919	0.0209592	P-loop nucleoside triphosphate hydrolase superfamily protein
Medtr2g094410	3.79552	0.00109512	0.0324988	senescence regulator
Medtr2g031750	3.81393	0.000126281	0.017207	transmembrane amino acid transporter family protein
Medtr1g018640	3.81626	4.35667e-05	0.0163938	gibberellin-regulated family protein
Medtr2g020370	3.82427	0.000916552	0.0305678	transmembrane protein, putative
Medtr3g116240	3.85461	0.000175862	0.0182434	polyol/monosaccharide transporter 1
Medtr2g103140	3.90478	1.26611e-05	0.0163938	acyl thioesterase-like protein
Medtr8g044070	3.94605	0.000935578	0.0305678	AP2 domain transcription factor
Medtr5g020060	3.94888	0.000720573	0.0284992	plant/MUD21-2 protein
Medtr4g103840	4.04397	0.00167875	0.0383277	hypothetical protein
Medtr3g073670	4.04755	8.60673e-05	0.017207	heavy metal transport/detoxification superfamily protein
Medtr7g013820	4.1013	0.00246313	0.0445812	ABI five-binding protein
Medtr5g045370	4.11279	0.000175113	0.0182434	ninja-family protein AFP1
Medtr1g111880	4.12472	0.00159969	0.0372421	fatty-acid desaturase
Medtr3g115050	4.17501	0.000166272	0.0182434	multi-copper oxidase-like protein
Medtr3g088845	4.18188	0.00130947	0.0345493	2-oxoisovalerate dehydrogenase subunit alpha
Medtr4g120050	4.18671	0.000244195	0.0200165	hypothetical protein
Medtr3g106290	4.21514	0.000228744	0.0196348	ethylene response factor
Medtr3g450930	4.25999	0.00212993	0.0421292	glutathione S-transferase, amino-terminal domain protein
Medtr5g033490	4.2658	0.0028621	0.0472026	LysM type receptor kinase
Medtr2g072400	4.29211	1.13485e-05	0.0163938	cytochrome P450 family 72 protein
Medtr8g070040	4.31032	0.000492768	0.0249309	Lipid transfer protein
Medtr7g116870	4.38896	0.00155566	0.0368871	lanatoside 15-O-acetylesterase
Medtr1g077790	4.39168	0.00068852	0.0284736	plastocyanin-like domain protein
Medtr4g037690	4.4773	5.48249e-05	0.0164732	transmembrane amino acid transporter family protein
Medtr5g016010	4.48872	6.96538e-06	0.0163938	peroxidase family protein
Medtr1g100627	4.65615	0.000122383	0.017207	hypothetical protein
Medtr2g101370	4.69904	0.000575123	0.0262699	major intrinsic protein (MIP) family transporter
Medtr1g099400	4.75386	0.000262817	0.0203977	G-type lectin S-receptor-like Serine/Threonine-kinase plant
Medtr7g084770	4.87511	0.000310526	0.0214928	xyloglucan endotransglucosylase/hydrolase family protein
Medtr4g020110	4.92516	0.000320551	0.0217049	delta-1-pyrroline-5-carboxylate synthetase
Medtr8g096020	5.11679	4.6607e-05	0.0163938	transmembrane protein, putative
Medtr4g106860	5.28725	1.34743e-05	0.0163938	gibberellin-regulated family protein
Medtr8g081600	5.38584	5.34919e-05	0.0163938	anthranilate N-benzoyltransferase-like protein, putative
Medtr4g123950	5.4246	0.00113515	0.0328132	group 3 LEA protein
Medtr8g081480	5.45995	0.000226682	0.0195898	HXXXD-type acyl-transferase family protein
Medtr1g096530	5.56747	0.000151573	0.0177729	sequence-specific DNA binding transcription factors;transcription regulators [Source:Projected from Arabidopsis thaliana (AT2G47270) TAIR;Acc:AT2G47270]
Medtr6g023190	5.7156	7.62506e-05	0.017207	hypothetical protein
Medtr7g010820	5.84266	0.000104478	0.017207	peptide/nitrate transporter
Medtr6g045403	5.92199	0.000714901	0.0284992	Kunitz type trypsin inhibitor / Alpha-fucosidase
Medtr3g021440	7.71106	2.51697e-05	0.0163938	caffeic acid O-methyltransferase
ENSRNA049474105	9.17686	2.33303e-06	0.0163938	Eukaryotic small subunit ribosomal RNA

## Sheet: Arabidopsis orthologs gProfiler
M. truncatula ID	ortholog_name	ortholog_ensg	description
MTR_6G092970	HKT1	AT4G10310	high-affinity K+ transporter 1 [Source:NCBI gene (formerly Entrezgene);Acc:826623]
MTR_7G490330	SSL1	AT2G41300	strictosidine synthase-like 1 [Source:NCBI gene (formerly Entrezgene);Acc:818729]
MTR_6G084940	AT1G58320	AT1G58320	PLAC8 family protein [Source:NCBI gene (formerly Entrezgene);Acc:842201]
MTR_2G019530	KAT2	AT4G18290	potassium channel KAT1-like protein [Source:NCBI gene (formerly Entrezgene);Acc:827555]
MTR_1G093600	EDF3	AT3G25730	ethylene response DNA binding factor 3 [Source:NCBI gene (formerly Entrezgene);Acc:822164]
MTR_1G028460	SWEET3	AT5G53190	Nodulin MtN3 family protein [Source:NCBI gene (formerly Entrezgene);Acc:835400]
MTR_5G083270	PYL6	AT2G40330	PYR1-like 6 [Source:NCBI gene (formerly Entrezgene);Acc:818626]
MTR_1G075730	AT3G23360	AT3G23360	Protein phosphatase 2C family protein [Source:NCBI gene (formerly Entrezgene);Acc:821917]
MTR_6G086170	SULTR3;5	AT5G19600	sulfate transporter 3;5 [Source:NCBI gene (formerly Entrezgene);Acc:832080]
MTR_5G026320	AT1G31490	AT1G31490	HXXXD-type acyl-transferase family protein [Source:NCBI gene (formerly Entrezgene);Acc:840039]
MTR_1G069200	CYP715A1	AT5G52400	cytochrome P450, family 715, subfamily A, polypeptide 1 [Source:NCBI gene (formerly Entrezgene);Acc:835316]
MTR_5G035750	AT1G13470	AT1G13470
MTR_7G020980	Rap2.6L	AT5G13330	related to AP2 6l [Source:NCBI gene (formerly Entrezgene);Acc:831174]
MTR_8G074335	HCHIB	AT3G12500	basic chitinase [Source:NCBI gene (formerly Entrezgene);Acc:820429]
MTR_7G089210	MEE3	AT2G21650	Homeodomain-like superfamily protein [Source:NCBI gene (formerly Entrezgene);Acc:816703]
MTR_3G113870	AT4G03140	AT4G03140	NAD(P)-binding Rossmann-fold superfamily protein [Source:NCBI gene (formerly Entrezgene);Acc:828065]
MTR_7G021010	Rap2.6L	AT5G13330	related to AP2 6l [Source:NCBI gene (formerly Entrezgene);Acc:831174]
MTR_4G063945	PK1B	AT2G28930	protein kinase 1B [Source:NCBI gene (formerly Entrezgene);Acc:817442]
MTR_1G110130	AT1G25390	AT1G25390	Protein kinase superfamily protein [Source:NCBI gene (formerly Entrezgene);Acc:839125]
MTR_6G043790	AT1G34300	AT1G34300	lectin protein kinase family protein [Source:NCBI gene (formerly Entrezgene);Acc:840330]
MTR_3G095040	WRKY51	AT5G64810	WRKY DNA-binding protein 51 [Source:NCBI gene (formerly Entrezgene);Acc:836602]
MTR_3G009760	AT4G20860	AT4G20860	FAD-binding Berberine family protein [Source:NCBI gene (formerly Entrezgene);Acc:827834]
MTR_7G107040	AT5G06570	AT5G06570	alpha/beta-Hydrolases superfamily protein [Source:NCBI gene (formerly Entrezgene);Acc:830545]
MTR_1G080680	DAN1	AT3G04620	Alba DNA/RNA-binding protein [Source:NCBI gene (formerly Entrezgene);Acc:819620]
MTR_6G075410	CNGC19	AT3G17690	cyclic nucleotide gated channel 19 [Source:NCBI gene (formerly Entrezgene);Acc:821036]
MTR_4G091780	AT1G11340	AT1G11340	G-type lectin S-receptor-like Serine/Threonine-kinase [Source:NCBI gene (formerly Entrezgene);Acc:837676]
MTR_3G088455	AAP5	AT1G44100	amino acid permease 5 [Source:NCBI gene (formerly Entrezgene);Acc:841013]
MTR_7G117200	WRKY46	AT2G46400	WRKY DNA-binding protein 46 [Source:NCBI gene (formerly Entrezgene);Acc:819248]
MTR_8G090270	AT5G10190	AT5G10190	Major facilitator superfamily protein [Source:NCBI gene (formerly Entrezgene);Acc:830883]
MTR_4G094610	FLS2	AT5G46330	Leucine-rich receptor-like protein kinase family protein [Source:NCBI gene (formerly Entrezgene);Acc:834676]
MTR_1G061170	HSFA3	AT5G03720	heat shock transcription factor A3 [Source:NCBI gene (formerly Entrezgene);Acc:831749]
MTR_7G034535	LUP5	AT1G66960	Terpenoid cyclases family protein [Source:NCBI gene (formerly Entrezgene);Acc:843014]
MTR_6G071280	MKK7	AT1G18350	MAP kinase kinase 7 [Source:NCBI gene (formerly Entrezgene);Acc:838416]
MTR_4G035180	CCR4	AT5G47850	CRINKLY4 related 4 [Source:NCBI gene (formerly Entrezgene);Acc:834836]
MTR_7G095430	SULTR3;1	AT3G51895	sulfate transporter 3;1 [Source:NCBI gene (formerly Entrezgene);Acc:824353]
MTR_1G058490	AT2G36090	AT2G36090	F-box family protein [Source:NCBI gene (formerly Entrezgene);Acc:818182]
MTR_3G009820	AT5G44360	AT5G44360	FAD-binding Berberine family protein [Source:NCBI gene (formerly Entrezgene);Acc:834462]
MTR_8G094580	ATAF2	AT5G08790	NAC (No Apical Meristem) domain transcriptional regulator superfamily protein [Source:NCBI gene (formerly Entrezgene);Acc:830779]
MTR_4G091680	AT1G11410	AT1G11410	S-locus lectin protein kinase family protein [Source:NCBI gene (formerly Entrezgene);Acc:837683]
MTR_0121S0060	AT2G31670	AT2G31670	Stress responsive alpha-beta barrel domain protein [Source:NCBI gene (formerly Entrezgene);Acc:817723]
MTR_3G096920	NAC102	AT5G63790	NAC domain containing protein 102 [Source:NCBI gene (formerly Entrezgene);Acc:836499]
MTR_4G005880	PGDH	AT1G17745	D-3-phosphoglycerate dehydrogenase [Source:NCBI gene (formerly Entrezgene);Acc:838352]
MTR_4G019580	AT2G37900	AT2G37900	Major facilitator superfamily protein [Source:NCBI gene (formerly Entrezgene);Acc:818366]
MTR_2G088980	AT3G21910	AT3G21910	cysteine-rich repeat secretory protein, putative (DUF26) [Source:NCBI gene (formerly Entrezgene);Acc:821746]
MTR_5G090620	UGT71B1	AT3G21750	UDP-glucosyl transferase 71B1 [Source:NCBI gene (formerly Entrezgene);Acc:821729]
MTR_3G092890	DMR6	AT5G24530	2-oxoglutarate (2OG) and Fe(II)-dependent oxygenase superfamily protein [Source:NCBI gene (formerly Entrezgene);Acc:832524]
MTR_3G088475	AAP5	AT1G44100	amino acid permease 5 [Source:NCBI gene (formerly Entrezgene);Acc:841013]
MTR_4G091820	AT1G11340	AT1G11340	G-type lectin S-receptor-like Serine/Threonine-kinase [Source:NCBI gene (formerly Entrezgene);Acc:837676]
MTR_2G015850	AT1G29080	AT1G29080	Papain family cysteine protease [Source:NCBI gene (formerly Entrezgene);Acc:839783]
MTR_8G089110	ARPN	AT2G02850	plantacyanin [Source:NCBI gene (formerly Entrezgene);Acc:814816]
MTR_4G091760	AT1G11340	AT1G11340	G-type lectin S-receptor-like Serine/Threonine-kinase [Source:NCBI gene (formerly Entrezgene);Acc:837676]
MTR_8G015200	AT1G51620	AT1G51620	Protein kinase superfamily protein [Source:NCBI gene (formerly Entrezgene);Acc:841587]
MTR_1G085680	CYP709B2	AT2G46950	cytochrome P450, family 709, subfamily B, polypeptide 2 [Source:NCBI gene (formerly Entrezgene);Acc:819309]
MTR_6G065270	CXE18	AT5G23530	carboxyesterase 18 [Source:NCBI gene (formerly Entrezgene);Acc:832418]
MTR_6G465530	CBF2	AT4G25470	C-repeat/DRE binding factor 2 [Source:NCBI gene (formerly Entrezgene);Acc:828651]
MTR_8G035860	CYP704A1	AT2G44890	cytochrome P450, family 704, subfamily A, polypeptide 1 [Source:NCBI gene (formerly Entrezgene);Acc:819098]
MTR_4G101380	NRT1.1	AT1G12110	nitrate transporter 1.1 [Source:NCBI gene (formerly Entrezgene);Acc:837763]
MTR_7G107670	AT4G03140	AT4G03140	NAD(P)-binding Rossmann-fold superfamily protein [Source:NCBI gene (formerly Entrezgene);Acc:828065]
MTR_2G100350	PEPC1	AT1G17710	Pyridoxal phosphate phosphatase-related protein [Source:NCBI gene (formerly Entrezgene);Acc:838347]
MTR_8G014700	AT1G51620	AT1G51620	Protein kinase superfamily protein [Source:NCBI gene (formerly Entrezgene);Acc:841587]
MTR_3G105690	GDU4	AT2G24762	glutamine dumper 4 [Source:NCBI gene (formerly Entrezgene);Acc:817013]
MTR_3G464530	AT3G47190	AT3G47190	2-oxoglutarate (2OG) and Fe(II)-dependent oxygenase superfamily protein [Source:NCBI gene (formerly Entrezgene);Acc:823872]
MTR_6G086560	AT3G24420	AT3G24420	alpha/beta-Hydrolases superfamily protein [Source:NCBI gene (formerly Entrezgene);Acc:822032]
MTR_1G105750	AT4G00960	AT4G00960	Protein kinase superfamily protein [Source:NCBI gene (formerly Entrezgene);Acc:827937]
MTR_7G015310	AT5G38990	AT5G38990	Malectin/receptor-like protein kinase family protein [Source:NCBI gene (formerly Entrezgene);Acc:833891]
MTR_6G040230	CK1	AT1G71697	choline kinase 1 [Source:NCBI gene (formerly Entrezgene);Acc:843500]
MTR_2G102140	OFP14	AT1G79960	ovate family protein 14 [Source:NCBI gene (formerly Entrezgene);Acc:844336]
MTR_1G105850	AT4G11521	AT4G11521	Receptor-like protein kinase-related family protein [Source:NCBI gene (formerly Entrezgene);Acc:7922527]
MTR_8G093090	WNK7	AT1G49160	Protein kinase superfamily protein [Source:NCBI gene (formerly Entrezgene);Acc:841339]
MTR_6G036890	AT3G47090	AT3G47090	Leucine-rich repeat protein kinase family protein [Source:NCBI gene (formerly Entrezgene);Acc:823862]
MTR_7G112130	NAS3	AT1G09240	nicotianamine synthase 3 [Source:NCBI gene (formerly Entrezgene);Acc:837444]
MTR_8G021225	AT4G26220	AT4G26220	S-adenosyl-L-methionine-dependent methyltransferases superfamily protein [Source:NCBI gene (formerly Entrezgene);Acc:828728]
MTR_7G073640	AGAL1	AT5G08380	alpha-galactosidase 1 [Source:NCBI gene (formerly Entrezgene);Acc:830736]
MTR_8G021233	AT1G17410	AT1G17410	Nucleoside diphosphate kinase family protein [Source:NCBI gene (formerly Entrezgene);Acc:838313]
MTR_7G015230	AT5G38990	AT5G38990	Malectin/receptor-like protein kinase family protein [Source:NCBI gene (formerly Entrezgene);Acc:833891]
MTR_1G074930	PHT1;5	AT2G32830	phosphate transporter 1;5 [Source:NCBI gene (formerly Entrezgene);Acc:817844]
MTR_7G013180	AT3G02100	AT3G02100	UDP-Glycosyltransferase superfamily protein [Source:NCBI gene (formerly Entrezgene);Acc:820287]
MTR_1G038430	AT5G23240	AT5G23240	DNAJ heat shock N-terminal domain-containing protein [Source:NCBI gene (formerly Entrezgene);Acc:832388]
MTR_5G083170	FER4	AT2G40300	ferritin 4 [Source:NCBI gene (formerly Entrezgene);Acc:818622]
MTR_6G065400	CXE18	AT5G23530	carboxyesterase 18 [Source:NCBI gene (formerly Entrezgene);Acc:832418]
MTR_6G036840	AT3G47110	AT3G47110	Leucine-rich repeat protein kinase family protein [Source:NCBI gene (formerly Entrezgene);Acc:823864]
MTR_6G045643	AT5G23950	AT5G23950	Calcium-dependent lipid-binding (CaLB domain) family protein [Source:NCBI gene (formerly Entrezgene);Acc:832460]
MTR_6G036870	EFR	AT5G20480	EF-TU receptor [Source:NCBI gene (formerly Entrezgene);Acc:832170]
MTR_6G065370	CXE18	AT5G23530	carboxyesterase 18 [Source:NCBI gene (formerly Entrezgene);Acc:832418]
MTR_3G464370	AT1G19715	AT1G19715	Mannose-binding lectin superfamily protein [Source:NCBI gene (formerly Entrezgene);Acc:838560]
MTR_7G007440	AT1G48750	AT1G48750	Bifunctional inhibitor/lipid-transfer protein/seed storage 2S albumin superfamily protein [Source:NCBI gene (formerly Entrezgene);Acc:841297]
MTR_7G015390	AT5G39000	AT5G39000	Malectin/receptor-like protein kinase family protein [Source:NCBI gene (formerly Entrezgene);Acc:833892]
MTR_1G054205	PA2	AT5G06720	peroxidase 2 [Source:NCBI gene (formerly Entrezgene);Acc:830561]
MTR_2G037790	ORP4B	AT4G25850	OSBP(oxysterol binding protein)-related protein 4B [Source:NCBI gene (formerly Entrezgene);Acc:828691]
MTR_3G117590	ASE1	AT2G16570	GLN phosphoribosyl pyrophosphate amidotransferase 1 [Source:NCBI gene (formerly Entrezgene);Acc:816156]
MTR_4G082580	WRKY4	AT1G13960	WRKY DNA-binding protein 4 [Source:NCBI gene (formerly Entrezgene);Acc:837956]
MTR_5G068820	AT5G54130	AT5G54130	Calcium-binding endonuclease/exonuclease/phosphatase family [Source:NCBI gene (formerly Entrezgene);Acc:835500]
MTR_7G009790	RLP6	AT1G45616	receptor like protein 6 [Source:NCBI gene (formerly Entrezgene);Acc:841101]
MTR_7G083870	AT3G26760	AT3G26760	NAD(P)-binding Rossmann-fold superfamily protein [Source:NCBI gene (formerly Entrezgene);Acc:822289]
MTR_5G013620	CT-BMY	AT4G17090	chloroplast beta-amylase [Source:NCBI gene (formerly Entrezgene);Acc:827419]
MTR_8G096310	SWEET11	AT3G48740	Nodulin MtN3 family protein [Source:NCBI gene (formerly Entrezgene);Acc:824035]
MTR_7G103560	AT2G36540	AT2G36540	Haloacid dehalogenase-like hydrolase (HAD) superfamily protein [Source:NCBI gene (formerly Entrezgene);Acc:818227]
MTR_8G022950	AT1G53903	AT1G53885	linoleate 9S-lipoxygenase-4 protein, putative (DUF581) [Source:NCBI gene (formerly Entrezgene);Acc:6241094]
MTR_1G111330	AT1G25500	AT1G25500	Plasma-membrane choline transporter family protein [Source:NCBI gene (formerly Entrezgene);Acc:839136]
MTR_5G068100	MES17	AT3G10870	methyl esterase 17 [Source:NCBI gene (formerly Entrezgene);Acc:820257]
MTR_8G006705	HB4	AT2G44910	homeobox-leucine zipper protein 4 [Source:NCBI gene (formerly Entrezgene);Acc:819100]
MTR_1G105700	CRK41	AT4G00970	cysteine-rich RLK (RECEPTOR-like protein kinase) 41 [Source:NCBI gene (formerly Entrezgene);Acc:827936]
MTR_7G033800	LBD25	AT3G27650	LOB domain-containing protein 25 [Source:NCBI gene (formerly Entrezgene);Acc:822387]
MTR_6G452730	AT5G52390	AT5G52390	PAR1 protein [Source:NCBI gene (formerly Entrezgene);Acc:835315]
MTR_5G024450	AT5G39390	AT5G39390	Leucine-rich repeat protein kinase family protein [Source:NCBI gene (formerly Entrezgene);Acc:833935]
MTR_2G074980	AT1G53420	AT1G53420	Leucine-rich repeat transmembrane protein kinase [Source:NCBI gene (formerly Entrezgene);Acc:841777]
MTR_6G036790	AT3G47090	AT3G47090	Leucine-rich repeat protein kinase family protein [Source:NCBI gene (formerly Entrezgene);Acc:823862]
MTR_3G081580	ZIP5	AT1G05300	zinc transporter 5 [Source:NCBI gene (formerly Entrezgene);Acc:837029]
MTR_1G041885	PTR3	AT5G46050	peptide transporter 3 [Source:NCBI gene (formerly Entrezgene);Acc:834646]
MTR_6G075290	CNBT1	AT3G17700	cyclic nucleotide-binding transporter 1 [Source:NCBI gene (formerly Entrezgene);Acc:821037]
MTR_5G013640	CT-BMY	AT4G17090	chloroplast beta-amylase [Source:NCBI gene (formerly Entrezgene);Acc:827419]
MTR_7G072140	LURP1	AT2G14560	LURP-one-like protein (DUF567) [Source:NCBI gene (formerly Entrezgene);Acc:815943]
MTR_1G069325	AT4G28706	AT4G28706	pfkB-like carbohydrate kinase family protein [Source:NCBI gene (formerly Entrezgene);Acc:828990]
MTR_6G012800	PME31	AT3G29090	pectin methylesterase 31 [Source:NCBI gene (formerly Entrezgene);Acc:822556]
MTR_3G070380	CPD	AT5G05690	Cytochrome P450 superfamily protein [Source:NCBI gene (formerly Entrezgene);Acc:830453]
MTR_6G032880	NDF5	AT1G55370	NDH-dependent cyclic electron flow 5 [Source:NCBI gene (formerly Entrezgene);Acc:841984]
MTR_4G028830	WNK5	AT3G51630	with no lysine (K) kinase 5 [Source:NCBI gene (formerly Entrezgene);Acc:824326]
MTR_2G040910	AT3G47090	AT3G47090	Leucine-rich repeat protein kinase family protein [Source:NCBI gene (formerly Entrezgene);Acc:823862]
MTR_2G025470	AT4G05590	AT4G05590	pyruvate carrier-like protein [Source:NCBI gene (formerly Entrezgene);Acc:825927]
MTR_1G112740	AT4G38540	AT4G38540	FAD/NAD(P)-binding oxidoreductase family protein [Source:NCBI gene (formerly Entrezgene);Acc:830011]
MTR_6G036780	AT3G47090	AT3G47090	Leucine-rich repeat protein kinase family protein [Source:NCBI gene (formerly Entrezgene);Acc:823862]
MTR_7G015250	AT5G38990	AT5G38990	Malectin/receptor-like protein kinase family protein [Source:NCBI gene (formerly Entrezgene);Acc:833891]
MTR_1G110180	AT1G25390	AT1G25390	Protein kinase superfamily protein [Source:NCBI gene (formerly Entrezgene);Acc:839125]
MTR_3G013500	ST2B	AT5G07000	sulfotransferase 2B [Source:NCBI gene (formerly Entrezgene);Acc:830591]
MTR_1G054880	AT1G02810	AT1G02810	Plant invertase/pectin methylesterase inhibitor superfamily [Source:NCBI gene (formerly Entrezgene);Acc:838078]
MTR_1G077840	YSL1	AT4G24120	YELLOW STRIPE like 1 [Source:NCBI gene (formerly Entrezgene);Acc:828512]
MTR_6G011550	AT3G01260	AT3G01260	Galactose mutarotase-like superfamily protein [Source:NCBI gene (formerly Entrezgene);Acc:821171]
MTR_4G132320	sks4	AT4G22010	SKU5 similar 4 [Source:NCBI gene (formerly Entrezgene);Acc:828290]
MTR_3G101900	AT5G07850	AT5G07850	HXXXD-type acyl-transferase family protein [Source:NCBI gene (formerly Entrezgene);Acc:830678]
MTR_1G010270	MOT1	AT2G25680	molybdate transporter 1 [Source:NCBI gene (formerly Entrezgene);Acc:817109]
MTR_7G015320	AT5G38990	AT5G38990	Malectin/receptor-like protein kinase family protein [Source:NCBI gene (formerly Entrezgene);Acc:833891]
MTR_7G067380	GPAT6	AT2G38110	glycerol-3-phosphate acyltransferase 6 [Source:NCBI gene (formerly Entrezgene);Acc:818389]
MTR_4G100530	AT4G16790	AT4G16790	hydroxyproline-rich glycoprotein family protein [Source:NCBI gene (formerly Entrezgene);Acc:827385]
MTR_4G015180	AT5G01210	AT5G01210	HXXXD-type acyl-transferase family protein [Source:NCBI gene (formerly Entrezgene);Acc:831901]
MTR_1G043190	CRY2	AT1G04400	cryptochrome 2 [Source:NCBI gene (formerly Entrezgene);Acc:839529]
MTR_4G035880	AT5G62360	AT5G62360	Plant invertase/pectin methylesterase inhibitor superfamily protein [Source:NCBI gene (formerly Entrezgene);Acc:836357]
MTR_4G052620	LOV1	AT2G02450	NAC domain containing protein 35 [Source:NCBI gene (formerly Entrezgene);Acc:814775]
MTR_8G043480	AT5G04980	AT5G04980	DNAse I-like superfamily protein [Source:NCBI gene (formerly Entrezgene);Acc:830380]
MTR_4G095032	AT2G23200	AT2G23200	Protein kinase superfamily protein [Source:NCBI gene (formerly Entrezgene);Acc:816852]
MTR_5G026150	AT3G47090	AT3G47090	Leucine-rich repeat protein kinase family protein [Source:NCBI gene (formerly Entrezgene);Acc:823862]
MTR_5G053920	EDF3	AT3G25730	ethylene response DNA binding factor 3 [Source:NCBI gene (formerly Entrezgene);Acc:822164]
MTR_7G078680	AT3G61490	AT3G61490	Pectin lyase-like superfamily protein [Source:NCBI gene (formerly Entrezgene);Acc:825322]
MTR_3G091560	iqd21	AT3G49260	IQ-domain 21 [Source:NCBI gene (formerly Entrezgene);Acc:824087]
MTR_1G105710	CRK28	AT4G21400	cysteine-rich RLK (RECEPTOR-like protein kinase) 28 [Source:NCBI gene (formerly Entrezgene);Acc:827892]
MTR_1G110120	AT1G25390	AT1G25390	Protein kinase superfamily protein [Source:NCBI gene (formerly Entrezgene);Acc:839125]
MTR_5G025860	AT3G47090	AT3G47090	Leucine-rich repeat protein kinase family protein [Source:NCBI gene (formerly Entrezgene);Acc:823862]
MTR_8G083520	ALDH2C4	AT3G24503	aldehyde dehydrogenase 2C4 [Source:NCBI gene (formerly Entrezgene);Acc:822042]
MTR_4G013350	AT1G55210	AT1G55210	Disease resistance-responsive (dirigent-like protein) family protein [Source:NCBI gene (formerly Entrezgene);Acc:841964]
MTR_7G009510	RLP7	AT1G47890	receptor like protein 7 [Source:NCBI gene (formerly Entrezgene);Acc:841206]
MTR_3G075440	SOBIR1	AT2G31880	Leucine-rich repeat protein kinase family protein [Source:NCBI gene (formerly Entrezgene);Acc:817746]
MTR_8G015010	AT1G51620	AT1G51620	Protein kinase superfamily protein [Source:NCBI gene (formerly Entrezgene);Acc:841587]
MTR_8G105590	FKF1	AT1G68050	flavin-binding, kelch repeat, f box 1 [Source:NCBI gene (formerly Entrezgene);Acc:843133]
MTR_3G086940	SNRK2.7	AT4G40010	SNF1-related protein kinase 2.7 [Source:NCBI gene (formerly Entrezgene);Acc:830162]
MTR_2G078760	AT3G15260	AT3G15260	Protein phosphatase 2C family protein [Source:NCBI gene (formerly Entrezgene);Acc:820757]
MTR_4G114550	SPX2	AT2G26660	SPX domain-containing protein 2 (SPX2) [Source:NCBI gene (formerly Entrezgene);Acc:817207]
MTR_8G087710	NIP1;2	AT4G18910	NOD26-like intrinsic protein 1;2 [Source:NCBI gene (formerly Entrezgene);Acc:827626]
MTR_7G015280	AT5G38990	AT5G38990	Malectin/receptor-like protein kinase family protein [Source:NCBI gene (formerly Entrezgene);Acc:833891]
MTR_7G068190	AT3G09010	AT3G09010	Protein kinase superfamily protein [Source:NCBI gene (formerly Entrezgene);Acc:820053]
MTR_4G015960	RPP27	AT1G54470	resistance to peronospora parasitica protein [Source:NCBI gene (formerly Entrezgene);Acc:841889]
MTR_4G075750	LHT7	AT4G35180	LYS/HIS transporter 7 [Source:NCBI gene (formerly Entrezgene);Acc:829671]
MTR_7G445390	AT3G60520	AT3G60520	zinc ion-binding protein [Source:NCBI gene (formerly Entrezgene);Acc:825223]
MTR_4G095660	AT4G37550	AT4G37550	Acetamidase/Formamidase family protein [Source:NCBI gene (formerly Entrezgene);Acc:829910]
MTR_3G088520	BGAL16	AT1G77410	beta-galactosidase 16 [Source:NCBI gene (formerly Entrezgene);Acc:844078]
MTR_5G026200	AT3G47090	AT3G47090	Leucine-rich repeat protein kinase family protein [Source:NCBI gene (formerly Entrezgene);Acc:823862]
MTR_6G023070	AT3G01750	AT3G01750	Ankyrin repeat family protein [Source:NCBI gene (formerly Entrezgene);Acc:821087]
MTR_8G104870	PCR2	AT1G14870	PLANT CADMIUM RESISTANCE 2 [Source:NCBI gene (formerly Entrezgene);Acc:838052]
MTR_5G011800	AT1G12320	AT1G12320	ankyrin repeat/KH domain protein (DUF1442) [Source:NCBI gene (formerly Entrezgene);Acc:837786]
MTR_8G077180	PPa2	AT2G18230	pyrophosphorylase 2 [Source:NCBI gene (formerly Entrezgene);Acc:816338]
MTR_7G100160	ALS3	AT2G37330	aluminum sensitive 3 [Source:NCBI gene (formerly Entrezgene);Acc:818310]
MTR_7G092230	OPT5	AT4G26590	oligopeptide transporter 5 [Source:NCBI gene (formerly Entrezgene);Acc:828766]
MTR_1G090920	AT5G04500	AT5G04500	glycosyltransferase family protein 47 [Source:NCBI gene (formerly Entrezgene);Acc:830329]
MTR_4G095490	AT5G67410	AT5G67410	transcriptional regulator of RNA polII, SAGA, subunit [Source:NCBI gene (formerly Entrezgene);Acc:836877]
MTR_1G081625	CYSD1	AT3G04940	cysteine synthase D1 [Source:NCBI gene (formerly Entrezgene);Acc:819654]
MTR_6G007985	SAG101	AT5G14930	senescence-associated 101 [Source:NCBI gene (formerly Entrezgene);Acc:831345]
MTR_7G015290	AT5G38990	AT5G38990	Malectin/receptor-like protein kinase family protein [Source:NCBI gene (formerly Entrezgene);Acc:833891]
MTR_7G079720	PIN5	AT5G16530	Auxin efflux carrier family protein [Source:NCBI gene (formerly Entrezgene);Acc:831515]
MTR_4G013325	AT1G58170	AT1G58170	Disease resistance-responsive (dirigent-like protein) family protein [Source:NCBI gene (formerly Entrezgene);Acc:842184]
MTR_2G075010	AT3G14840	AT3G14840	Leucine-rich repeat transmembrane protein kinase [Source:NCBI gene (formerly Entrezgene);Acc:820713]
MTR_7G102490	UGT73C1	AT2G36750	UDP-glucosyl transferase 73C1 [Source:NCBI gene (formerly Entrezgene);Acc:818247]
MTR_5G070090	UGT71C5	AT1G07240	UDP-glucosyl transferase 71C5 [Source:NCBI gene (formerly Entrezgene);Acc:837235]
MTR_5G009670	AT4G23730	AT4G23730	Galactose mutarotase-like superfamily protein [Source:NCBI gene (formerly Entrezgene);Acc:828473]
MTR_8G105700	AT1G14780	AT1G14780	MAC/Perforin domain-containing protein [Source:NCBI gene (formerly Entrezgene);Acc:838043]
MTR_1G111060	AT1G13360	AT1G13360
MTR_3G008580	SKS1	AT4G25240	SKU5 similar 1 [Source:NCBI gene (formerly Entrezgene);Acc:828627]
MTR_8G009120	2A6	AT1G03410	2-oxoglutarate (2OG) and Fe(II)-dependent oxygenase superfamily protein [Source:NCBI gene (formerly Entrezgene);Acc:838763]
MTR_3G082630	COL9	AT3G07650	CONSTANS-like 9 [Source:NCBI gene (formerly Entrezgene);Acc:819956]
MTR_4G070660	AT4G34560	AT4G34560	transmembrane protein [Source:NCBI gene (formerly Entrezgene);Acc:829608]
MTR_4G095042	AT2G23200	AT2G23200	Protein kinase superfamily protein [Source:NCBI gene (formerly Entrezgene);Acc:816852]
MTR_7G013790	scpl25	AT3G02110	serine carboxypeptidase-like 25 [Source:NCBI gene (formerly Entrezgene);Acc:821207]
MTR_5G022970	AT2G17710	AT2G17710	Big1 [Source:NCBI gene (formerly Entrezgene);Acc:816280]
MTR_4G080750	AT3G58720	AT3G58720	RING/U-box superfamily protein [Source:NCBI gene (formerly Entrezgene);Acc:825041]
MTR_5G067700	WRKY54	AT2G40750	WRKY DNA-binding protein 54 [Source:NCBI gene (formerly Entrezgene);Acc:818670]
MTR_7G113970	AT1G54730	AT1G54730	Major facilitator superfamily protein [Source:NCBI gene (formerly Entrezgene);Acc:841914]
MTR_8G447220	RGLG4	AT1G79380	Ca(2)-dependent phospholipid-binding protein (Copine) family [Source:NCBI gene (formerly Entrezgene);Acc:844276]
MTR_4G070080	GRP7	AT2G21660	cold, circadian rhythm, and rna binding 2 [Source:NCBI gene (formerly Entrezgene);Acc:816705]
MTR_4G050762	AT3G19690	AT3G19690	CAP (Cysteine-rich secretory proteins, Antigen 5, and Pathosis-related 1 protein) superfamily protein [Source:NCBI gene (formerly Entrezgene);Acc:821506]
MTR_4G057960	AT3G45090	AT3G45090	P-loop containing nucleoside triphosphate hydrolases superfamily protein [Source:NCBI gene (formerly Entrezgene);Acc:823644]
MTR_1G081620	CYSD2	AT5G28020	cysteine synthase D2 [Source:NCBI gene (formerly Entrezgene);Acc:832872]
MTR_5G015490	SHR	AT4G37650	GRAS family transcription factor [Source:NCBI gene (formerly Entrezgene);Acc:829919]
MTR_8G033070	TCP9	AT2G45680	TCP family transcription factor [Source:NCBI gene (formerly Entrezgene);Acc:819176]
MTR_7G033325	AT3G01620	AT3G01620	beta-1,4-N-acetylglucosaminyltransferase family protein [Source:NCBI gene (formerly Entrezgene);Acc:821102]
MTR_4G082830	AT1G13930	AT1G13930	oleosin-B3-like protein [Source:NCBI gene (formerly Entrezgene);Acc:837953]
MTR_2G073650	AT1G53420	AT1G53420	Leucine-rich repeat transmembrane protein kinase [Source:NCBI gene (formerly Entrezgene);Acc:841777]
MTR_7G062950	AT1G70110	AT1G70110	Concanavalin A-like lectin protein kinase family protein [Source:NCBI gene (formerly Entrezgene);Acc:843347]
MTR_4G084710	scpl50	AT1G15000	serine carboxypeptidase-like 50 [Source:NCBI gene (formerly Entrezgene);Acc:838065]
MTR_1G059970	AT5G03880	AT5G03880	Thioredoxin family protein [Source:NCBI gene (formerly Entrezgene);Acc:831679]
MTR_1G013820	CM2	AT5G10870	chorismate mutase 2 [Source:NCBI gene (formerly Entrezgene);Acc:830954]
MTR_2G020830	AT3G21570	AT3G21570	proline-rich nuclear receptor coactivator [Source:NCBI gene (formerly Entrezgene);Acc:821711]
MTR_7G406860	AT1G65560	AT1G65560	Zinc-binding dehydrogenase family protein [Source:NCBI gene (formerly Entrezgene);Acc:842867]
MTR_3G086910	GCL1	AT5G65280	GCR2-like 1 [Source:NCBI gene (formerly Entrezgene);Acc:836653]
MTR_8G494200	PAD4	AT3G52430	alpha/beta-Hydrolases superfamily protein [Source:NCBI gene (formerly Entrezgene);Acc:824408]
MTR_8G030690	AT2G45910	AT2G45910	U-box domain-containing protein kinase family protein [Source:NCBI gene (formerly Entrezgene);Acc:819199]
MTR_4G099050	AT4G17670	AT4G17670	senescence-associated family protein (DUF581) [Source:NCBI gene (formerly Entrezgene);Acc:827487]
MTR_4G091370	STP1	AT1G11260	sugar transporter 1 [Source:NCBI gene (formerly Entrezgene);Acc:837667]
MTR_3G095840	ATXR5	AT5G09790	TRITHORAX-RELATED PROTEIN 5 [Source:NCBI gene (formerly Entrezgene);Acc:830839]
MTR_1G035690	AT3G11920	AT3G11920	glutaredoxin-like protein [Source:NCBI gene (formerly Entrezgene);Acc:820365]
MTR_8G107000	AT1G18160	AT1G18160	Protein kinase superfamily protein [Source:NCBI gene (formerly Entrezgene);Acc:838395]
MTR_5G092820	AT5G54940	AT5G54940	Translation initiation factor SUI1 family protein [Source:NCBI gene (formerly Entrezgene);Acc:835585]
MTR_1G076330	AT5G02940	AT5G02940	ion channel POLLUX-like protein, putative (DUF1012) [Source:NCBI gene (formerly Entrezgene);Acc:831426]
MTR_0110S0040	BGLU43	AT3G18070	beta glucosidase 43 [Source:NCBI gene (formerly Entrezgene);Acc:821332]
MTR_0318S0020	AT5G51670	AT5G51670
MTR_7G024320	ACR9	AT2G39570	ACT domain-containing protein [Source:NCBI gene (formerly Entrezgene);Acc:818542]
MTR_2G095510	AT4G05160	AT4G05160	AMP-dependent synthetase and ligase family protein [Source:NCBI gene (formerly Entrezgene);Acc:825864]
MTR_2G040510	MEK1	AT4G26070	MAP kinase/ ERK kinase 1 [Source:NCBI gene (formerly Entrezgene);Acc:828713]
MTR_7G103870	AT5G03700	AT5G03700	D-mannose binding lectin protein with Apple-like carbohydrate-binding domain-containing protein [Source:NCBI gene (formerly Entrezgene);Acc:831753]
MTR_7G085630	GDH3	AT3G03910	glutamate dehydrogenase 3 [Source:NCBI gene (formerly Entrezgene);Acc:821072]
MTR_4G022430	KAT5	AT5G48880	peroxisomal 3-keto-acyl-CoA thiolase 2 [Source:NCBI gene (formerly Entrezgene);Acc:834946]
MTR_8G103490	AT3G24570	AT3G24570	Peroxisomal membrane 22 kDa (Mpv17/PMP22) family protein [Source:NCBI gene (formerly Entrezgene);Acc:822053]
MTR_4G122830	AT1G47970	AT1G47970	nucleolin [Source:NCBI gene (formerly Entrezgene);Acc:841215]
MTR_7G015240	AT5G38990	AT5G38990	Malectin/receptor-like protein kinase family protein [Source:NCBI gene (formerly Entrezgene);Acc:833891]
MTR_3G064370	PAO4	AT1G65840	polyamine oxidase 4 [Source:NCBI gene (formerly Entrezgene);Acc:842894]
MTR_1G014070	ENP	AT4G31820	Phototropic-responsive NPH3 family protein [Source:NCBI gene (formerly Entrezgene);Acc:829311]
MTR_1G109430	PAP1	AT2G01180	phosphatidic acid phosphatase 1 [Source:NCBI gene (formerly Entrezgene);Acc:814646]
MTR_3G011840	ABCC12	AT1G30410	multidrug resistance-associated protein 13 [Source:NCBI gene (formerly Entrezgene);Acc:839921]
MTR_1G029840	ALDH3H1	AT1G44170	aldehyde dehydrogenase 3H1 [Source:NCBI gene (formerly Entrezgene);Acc:841020]
MTR_8G061950	GSTU18	AT1G10360	glutathione S-transferase TAU 18 [Source:NCBI gene (formerly Entrezgene);Acc:837575]
MTR_4G095012	AT2G23200	AT2G23200	Protein kinase superfamily protein [Source:NCBI gene (formerly Entrezgene);Acc:816852]
MTR_5G013370	GATA26	AT4G17570	GATA transcription factor 26 [Source:NCBI gene (formerly Entrezgene);Acc:827474]
MTR_6G088680	AT3G21590	AT3G21590	Senescence/dehydration-associated protein-like protein [Source:NCBI gene (formerly Entrezgene);Acc:821713]
MTR_6G033335	TET6	AT3G12090	tetraspanin6 [Source:NCBI gene (formerly Entrezgene);Acc:820383]
MTR_2G009310	AT4G33565	AT4G33565	RING/U-box superfamily protein [Source:NCBI gene (formerly Entrezgene);Acc:829496]
MTR_1G040195	CHAT	AT3G03480	acetyl CoA:(Z)-3-hexen-1-ol acetyltransferase [Source:NCBI gene (formerly Entrezgene);Acc:821249]
MTR_3G460790	NUDT10	AT4G25434	nudix hydrolase homolog 10 [Source:NCBI gene (formerly Entrezgene);Acc:828648]
MTR_3G072830	AT2G41705	AT2G41705	camphor resistance CrcB family protein [Source:NCBI gene (formerly Entrezgene);Acc:818769]
MTR_2G090210	AT1G03610	AT1G03610	plant/protein (DUF789) [Source:NCBI gene (formerly Entrezgene);Acc:838961]
MTR_3G077890	AT5G62770	AT5G62770	membrane-associated kinase regulator, putative (DUF1645) [Source:NCBI gene (formerly Entrezgene);Acc:836398]
MTR_5G090670	HYR1	AT3G21760	UDP-Glycosyltransferase superfamily protein [Source:NCBI gene (formerly Entrezgene);Acc:821730]
MTR_3G084450	AAE16	AT3G23790	AMP-dependent synthetase and ligase family protein [Source:NCBI gene (formerly Entrezgene);Acc:821961]
MTR_7G102750	AT2G36670	AT2G36670	Eukaryotic aspartyl protease family protein [Source:NCBI gene (formerly Entrezgene);Acc:818239]
MTR_8G008840	AT2G44670	AT2G44670	senescence-associated family protein (DUF581) [Source:NCBI gene (formerly Entrezgene);Acc:819075]
MTR_8G012960	RIN4	AT3G25070	RPM1 interacting protein 4 [Source:NCBI gene (formerly Entrezgene);Acc:822098]
MTR_2G090755	GRX480	AT1G28480	Thioredoxin superfamily protein [Source:NCBI gene (formerly Entrezgene);Acc:839748]
MTR_4G126210	AT4G26130	AT4G26130	cotton fiber protein [Source:NCBI gene (formerly Entrezgene);Acc:828719]
MTR_1G108440	RSW10	AT1G71100	Ribose 5-phosphate isomerase, type A protein [Source:NCBI gene (formerly Entrezgene);Acc:843450]
MTR_1G112780	AT5G05320	AT5G05320	FAD/NAD(P)-binding oxidoreductase family protein [Source:NCBI gene (formerly Entrezgene);Acc:830414]
MTR_5G033690	CRK2	AT1G70520	cysteine-rich RLK (RECEPTOR-like protein kinase) 2 [Source:NCBI gene (formerly Entrezgene);Acc:843389]
MTR_8G083300	IAGLU	AT4G15550	indole-3-acetate beta-D-glucosyltransferase [Source:NCBI gene (formerly Entrezgene);Acc:827229]
MTR_3G092780	PRR5	AT5G24470	two-component response regulator-like protein [Source:NCBI gene (formerly Entrezgene);Acc:832518]
MTR_3G092840	TTG1	AT5G24520	Transducin/WD40 repeat-like superfamily protein [Source:NCBI gene (formerly Entrezgene);Acc:832523]
MTR_3G058630	ZIP11	AT1G55910	zinc transporter 11 [Source:NCBI gene (formerly Entrezgene);Acc:842041]
MTR_2G073520	AT1G53420	AT1G53420	Leucine-rich repeat transmembrane protein kinase [Source:NCBI gene (formerly Entrezgene);Acc:841777]
MTR_4G061360	PRR3	AT5G60100	pseudo-response regulator 3 [Source:NCBI gene (formerly Entrezgene);Acc:836132]
MTR_5G055150	AHP2	AT1G13330	Tat-binding protein 1(Tbp-1)-interacting protein (TBPIP) [Source:NCBI gene (formerly Entrezgene);Acc:837893]
MTR_3G072030	SAG20	AT3G10985	senescence associated 20 [Source:NCBI gene (formerly Entrezgene);Acc:2745879]
MTR_8G039950	AT5G17540	AT5G17540	HXXXD-type acyl-transferase family protein [Source:NCBI gene (formerly Entrezgene);Acc:831620]
MTR_4G010140	PIFI	AT3G15840	post-illumination chlorophyll fluorescence increase [Source:NCBI gene (formerly Entrezgene);Acc:820827]
MTR_7G094350	SK4	AT1G20140	SKP1-like 4 [Source:NCBI gene (formerly Entrezgene);Acc:838604]
MTR_1G057560	EXO70A2	AT5G52340	exocyst subunit exo70 family protein A2 [Source:NCBI gene (formerly Entrezgene);Acc:835310]
MTR_7G102560	UGT73C7	AT3G53160	UDP-glucosyl transferase 73C7 [Source:NCBI gene (formerly Entrezgene);Acc:824482]
MTR_8G070880	AT1G79620	AT1G79620	Leucine-rich repeat protein kinase family protein [Source:NCBI gene (formerly Entrezgene);Acc:844301]
MTR_5G029750	PGP10	AT1G10680	P-glycoprotein 10 [Source:NCBI gene (formerly Entrezgene);Acc:837611]
MTR_3G462150	GIL1	AT5G58960	glucose-6-phosphate isomerase, putative (DUF641) [Source:NCBI gene (formerly Entrezgene);Acc:836013]
MTR_8G102620	NADP-ME1	AT2G19900	NADP-malic enzyme 1 [Source:NCBI gene (formerly Entrezgene);Acc:816509]
MTR_1G111400	SPD1	AT3G10420	P-loop containing nucleoside triphosphate hydrolases superfamily protein [Source:NCBI gene (formerly Entrezgene);Acc:820206]
MTR_1G114520	ASA2	AT2G29690	anthranilate synthase 2 [Source:NCBI gene (formerly Entrezgene);Acc:817519]
MTR_7G113880	GSH2	AT5G27380	glutathione synthetase 2 [Source:NCBI gene (formerly Entrezgene);Acc:832797]
MTR_0025S0060	TPP2	AT4G20850	tripeptidyl peptidase ii [Source:NCBI gene (formerly Entrezgene);Acc:827833]
MTR_7G029030	AT5G14130	AT5G14130	Peroxidase superfamily protein [Source:NCBI gene (formerly Entrezgene);Acc:831263]
MTR_1G107555	LPR1	AT1G23010	Cupredoxin superfamily protein [Source:NCBI gene (formerly Entrezgene);Acc:838909]
MTR_7G104680	AT3G10120	AT3G10120
MTR_7G099910	AT3G09470	AT3G09470	Major facilitator superfamily protein [Source:NCBI gene (formerly Entrezgene);Acc:820104]
MTR_4G070140	CCR1	AT4G39260	cold, circadian rhythm, and RNA binding 1 [Source:NCBI gene (formerly Entrezgene);Acc:830082]
MTR_7G071440	SCAR2	AT2G38440	SCAR homolog 2 [Source:NCBI gene (formerly Entrezgene);Acc:818425]
MTR_4G122980	SFR2	AT3G06510	Glycosyl hydrolase superfamily protein [Source:NCBI gene (formerly Entrezgene);Acc:819829]
MTR_4G127420	CIL	AT4G25990	CCT motif family protein [Source:NCBI gene (formerly Entrezgene);Acc:828705]
MTR_2G009660	AT4G33640	AT4G33640	costars family protein [Source:NCBI gene (formerly Entrezgene);Acc:829505]
MTR_3G088110	ATAF1	AT1G01720	NAC (No Apical Meristem) domain transcriptional regulator superfamily protein [Source:NCBI gene (formerly Entrezgene);Acc:839265]
MTR_2G090960	TCP10	AT2G31070	TCP domain protein 10 [Source:NCBI gene (formerly Entrezgene);Acc:817659]
MTR_4G084180	SRX	AT1G31170	sulfiredoxin [Source:NCBI gene (formerly Entrezgene);Acc:840004]
MTR_3G105530	AT5G21970	AT5G21970	Ubiquitin carboxyl-terminal hydrolase family protein [Source:NCBI gene (formerly Entrezgene);Acc:832257]
MTR_2G073540	AT3G14840	AT3G14840	Leucine-rich repeat transmembrane protein kinase [Source:NCBI gene (formerly Entrezgene);Acc:820713]
MTR_1G104650	LOX5	AT3G22400	PLAT/LH2 domain-containing lipoxygenase family protein [Source:NCBI gene (formerly Entrezgene);Acc:821808]
MTR_3G020670	ABA2	AT1G52340	NAD(P)-binding Rossmann-fold superfamily protein [Source:NCBI gene (formerly Entrezgene);Acc:841665]
MTR_1G021955	AT5G42610	AT5G42610	calcium uniporter (DUF607) [Source:NCBI gene (formerly Entrezgene);Acc:834268]
MTR_4G092840	AT5G64460	AT5G64460	Phosphoglycerate mutase family protein [Source:NCBI gene (formerly Entrezgene);Acc:836567]
MTR_4G093650	HEN4	AT5G64390	RNA-binding KH domain-containing protein [Source:NCBI gene (formerly Entrezgene);Acc:836560]
MTR_1G061050	FBA6	AT2G36460	Aldolase superfamily protein [Source:NCBI gene (formerly Entrezgene);Acc:818220]
MTR_1G008700	GLB3	AT4G32690	hemoglobin 3 [Source:NCBI gene (formerly Entrezgene);Acc:829404]
MTR_4G091670	RK3	AT4G21380	receptor kinase 3 [Source:NCBI gene (formerly Entrezgene);Acc:827890]
MTR_4G100480	NUDT8	AT5G47240	nudix hydrolase homolog 8 [Source:NCBI gene (formerly Entrezgene);Acc:834771]
MTR_2G028950	NPR4	AT4G19660	NPR1-like protein 4 [Source:NCBI gene (formerly Entrezgene);Acc:827710]
MTR_3G112160	AT1G19660	AT1G19660	Wound-responsive family protein [Source:NCBI gene (formerly Entrezgene);Acc:838553]
MTR_0022S0430	NLP7	AT4G24020	NIN like protein 7 [Source:NCBI gene (formerly Entrezgene);Acc:828502]
MTR_5G017650	PCR1	AT1G14880	PLANT CADMIUM RESISTANCE 1 [Source:NCBI gene (formerly Entrezgene);Acc:838053]
MTR_7G069640	AMT2	AT2G38290	ammonium transporter 2 [Source:NCBI gene (formerly Entrezgene);Acc:818409]
MTR_4G123870	AT3G17410	AT3G17410	Protein kinase superfamily protein [Source:NCBI gene (formerly Entrezgene);Acc:821005]
MTR_8G088745	SNRK2.9	AT2G23030	SNF1-related protein kinase 2.9 [Source:NCBI gene (formerly Entrezgene);Acc:816833]
MTR_3G115580	HMGB2	AT1G20693	high mobility group B2 [Source:NCBI gene (formerly Entrezgene);Acc:838658]
MTR_0034S0170	TPS1	AT1G78580	trehalose-6-phosphate synthase [Source:NCBI gene (formerly Entrezgene);Acc:844194]
MTR_8G467380	AT1G69610	AT1G69610	zinc finger FYVE domain protein, putative (DUF1666) [Source:NCBI gene (formerly Entrezgene);Acc:843297]
MTR_7G067120	AT5G65550	AT5G65550	UDP-Glycosyltransferase superfamily protein [Source:NCBI gene (formerly Entrezgene);Acc:836681]
MTR_2G098430	AT5G12890	AT5G12890	UDP-Glycosyltransferase superfamily protein [Source:NCBI gene (formerly Entrezgene);Acc:831129]
MTR_4G107810	HIR1	AT5G62740	SPFH/Band 7/PHB domain-containing membrane-associated protein family [Source:NCBI gene (formerly Entrezgene);Acc:836395]
MTR_8G107410	ABCI17	AT1G67940	non-intrinsic ABC protein 3 [Source:NCBI gene (formerly Entrezgene);Acc:843122]
MTR_3G102270	AT3G46630	AT3G46630	DCL protein (DUF3223) [Source:NCBI gene (formerly Entrezgene);Acc:823816]
MTR_8G088590	AT2G31800	AT2G31800	Integrin-linked protein kinase family [Source:NCBI gene (formerly Entrezgene);Acc:817737]
MTR_1G022465	JMT	AT1G19640	jasmonic acid carboxyl methyltransferase [Source:NCBI gene (formerly Entrezgene);Acc:838551]
MTR_3G069160	DFD	AT3G55630	DHFS-FPGS homolog D [Source:NCBI gene (formerly Entrezgene);Acc:824729]
MTR_5G025280	AT4G19180	AT4G19180	GDA1/CD39 nucleoside phosphatase family protein [Source:NCBI gene (formerly Entrezgene);Acc:827656]
MTR_3G092900	OMT1	AT5G54160	O-methyltransferase 1 [Source:NCBI gene (formerly Entrezgene);Acc:835504]
MTR_1G031590	AT1G14970	AT1G14970	O-fucosyltransferase family protein [Source:NCBI gene (formerly Entrezgene);Acc:838062]
MTR_3G090820	MTM1	AT4G27940	manganese tracking factor for mitochondrial SOD2 [Source:NCBI gene (formerly Entrezgene);Acc:828907]
MTR_3G100620	GRF6	AT5G10450	G-box regulating factor 6 [Source:NCBI gene (formerly Entrezgene);Acc:830909]
MTR_4G072110	ASE2	AT4G34740	GLN phosphoribosyl pyrophosphate amidotransferase 2 [Source:NCBI gene (formerly Entrezgene);Acc:829626]
MTR_7G109970	GLB1	AT4G01900	nitrogen regulatory P-II-like protein [Source:NCBI gene (formerly Entrezgene);Acc:828213]
MTR_3G011820	ABCC11	AT1G30420	multidrug resistance-associated protein 12 [Source:NCBI gene (formerly Entrezgene);Acc:839922]
MTR_2G028550	AT3G54630	AT3G54630	kinetochore protein [Source:NCBI gene (formerly Entrezgene);Acc:824628]
MTR_4G088750	AT3G46930	AT3G46930	Protein kinase superfamily protein [Source:NCBI gene (formerly Entrezgene);Acc:823846]
MTR_7G085420	AT2G23840	AT2G23840	HNH endonuclease [Source:NCBI gene (formerly Entrezgene);Acc:816916]
MTR_5G070320	ABCG31	AT2G29940	pleiotropic drug resistance 3 [Source:NCBI gene (formerly Entrezgene);Acc:817544]
MTR_1G101540	AT5G52030	AT5G52030	TraB family protein [Source:NCBI gene (formerly Entrezgene);Acc:835278]
MTR_4G070190	CCR1	AT4G39260	cold, circadian rhythm, and RNA binding 1 [Source:NCBI gene (formerly Entrezgene);Acc:830082]
MTR_7G115530	PHR1	AT4G28610	phosphate starvation response 1 [Source:NCBI gene (formerly Entrezgene);Acc:828979]
MTR_5G095470	SERAT2;1	AT1G55920	serine acetyltransferase 2;1 [Source:NCBI gene (formerly Entrezgene);Acc:842043]
MTR_1G076370	CIPK7	AT3G23000	CBL-interacting protein kinase 7 [Source:NCBI gene (formerly Entrezgene);Acc:821874]
MTR_3G408350	AT5G51400	AT5G51400	PLAC8 family protein [Source:NCBI gene (formerly Entrezgene);Acc:835214]
MTR_8G026730	AT2G46690	AT2G46690	SAUR-like auxin-responsive protein family [Source:NCBI gene (formerly Entrezgene);Acc:819281]
MTR_4G045973	DGK5	AT2G20900	diacylglycerol kinase 5 [Source:NCBI gene (formerly Entrezgene);Acc:816624]
MTR_4G021170	RLM3	AT4G16990	disease resistance protein (TIR-NBS class) [Source:NCBI gene (formerly Entrezgene);Acc:827407]
MTR_4G030060	AT1G33490	AT1G33490	E3 ubiquitin-protein ligase [Source:NCBI gene (formerly Entrezgene);Acc:840243]
MTR_0077S0010	AT1G49000	AT1G49000	transmembrane protein [Source:NCBI gene (formerly Entrezgene);Acc:841322]
MTR_6G070920	NUDT4	AT1G18300	nudix hydrolase homolog 4 [Source:NCBI gene (formerly Entrezgene);Acc:838410]
MTR_5G030530	BOU	AT5G46800	Mitochondrial substrate carrier family protein [Source:NCBI gene (formerly Entrezgene);Acc:834724]
MTR_2G075410	BEH4	AT1G78700	BES1/BZR1 homolog 4 [Source:NCBI gene (formerly Entrezgene);Acc:844206]
MTR_5G011780	PHR1	AT1G12370	photolyase 1 [Source:NCBI gene (formerly Entrezgene);Acc:837792]
MTR_8G076490	UBC17	AT4G36410	ubiquitin-conjugating enzyme 17 [Source:NCBI gene (formerly Entrezgene);Acc:829793]
MTR_6G092700	ACHT1	AT4G26160	atypical CYS HIS rich thioredoxin 1 [Source:NCBI gene (formerly Entrezgene);Acc:828722]
MTR_4G063940	APK1A	AT1G07570	Protein kinase superfamily protein [Source:NCBI gene (formerly Entrezgene);Acc:837271]
MTR_8G446430	KAT1	AT5G46240	1 [Source:NCBI gene (formerly Entrezgene);Acc:834666]
MTR_2G034440	AT4G16260	AT4G16260	Glycosyl hydrolase superfamily protein [Source:NCBI gene (formerly Entrezgene);Acc:827320]
MTR_8G031550	KEA1	AT1G01790	K+ efflux antiporter 1 [Source:NCBI gene (formerly Entrezgene);Acc:837332]
MTR_8G076080	AT3G51180	AT3G51180	Zinc finger C-x8-C-x5-C-x3-H type family protein [Source:NCBI gene (formerly Entrezgene);Acc:824281]
MTR_4G122900	AT3G17160	AT3G17160
MTR_2G008980	MC3	AT5G64240	metacaspase 3 [Source:NCBI gene (formerly Entrezgene);Acc:836545]
MTR_4G134510	AL6	AT2G02470	alfin-like 6 [Source:NCBI gene (formerly Entrezgene);Acc:814776]
MTR_3G084520	UGT75B2	AT1G05530	UDP-glucosyl transferase 75B2 [Source:NCBI gene (formerly Entrezgene);Acc:837055]
MTR_7G011820	WRKY58	AT3G01080	WRKY DNA-binding protein 58 [Source:NCBI gene (formerly Entrezgene);Acc:821213]
MTR_6G088460	AT5G19540	AT5G19540	thermosome subunit gamma [Source:NCBI gene (formerly Entrezgene);Acc:832074]
MTR_4G009920	NHO1	AT1G80460	Actin-like ATPase superfamily protein [Source:NCBI gene (formerly Entrezgene);Acc:844385]
MTR_2G014950	AT5G46020	AT5G46020	28 kDa heat/acid-stable phosphoprotein-like protein [Source:NCBI gene (formerly Entrezgene);Acc:834642]
MTR_4G084280	AT1G23140	AT1G23140	Calcium-dependent lipid-binding (CaLB domain) family protein [Source:NCBI gene (formerly Entrezgene);Acc:838922]
MTR_7G068280	HMGB1	AT3G51880	high mobility group B1 [Source:NCBI gene (formerly Entrezgene);Acc:824351]
MTR_8G031100	AT2G45850	AT2G45850	AT hook motif DNA-binding family protein [Source:NCBI gene (formerly Entrezgene);Acc:819193]
MTR_8G023830	AT1G02270	AT1G02270	Calcium-binding endonuclease/exonuclease/phosphatase family [Source:NCBI gene (formerly Entrezgene);Acc:839381]
MTR_2G082640	ILR3	AT5G54680	basic helix-loop-helix (bHLH) DNA-binding superfamily protein [Source:NCBI gene (formerly Entrezgene);Acc:835557]
MTR_4G068457	AT1G49450	AT1G49450	Transducin/WD40 repeat-like superfamily protein [Source:NCBI gene (formerly Entrezgene);Acc:841369]
MTR_7G108825	AT4G02340	AT4G02340	alpha/beta-Hydrolases superfamily protein [Source:NCBI gene (formerly Entrezgene);Acc:828063]
MTR_8G446930	HUA1	AT3G12680	floral homeotic protein (HUA1) [Source:NCBI gene (formerly Entrezgene);Acc:820448]
MTR_2G018125	AT5G45640	AT5G45640	Subtilisin-like serine endopeptidase family protein [Source:NCBI gene (formerly Entrezgene);Acc:834604]
MTR_3G111840	AT5G42760	AT5G42760	Leucine carboxyl methyltransferase [Source:NCBI gene (formerly Entrezgene);Acc:834285]
MTR_4G015590	PDX2	AT5G60540	pyridoxine biosynthesis 2 [Source:NCBI gene (formerly Entrezgene);Acc:836175]
MTR_7G108820	EID1	AT4G02440	F-box family protein [Source:NCBI gene (formerly Entrezgene);Acc:828008]
MTR_2G067080	RDH2	AT1G16460	rhodanese homologue 2 [Source:NCBI gene (formerly Entrezgene);Acc:838216]
MTR_2G010750	CXXS1	AT1G11530	C-terminal cysteine residue is changed to a serine 1 [Source:NCBI gene (formerly Entrezgene);Acc:837696]
MTR_8G074030	IDH-III	AT4G35650	isocitrate dehydrogenase III [Source:NCBI gene (formerly Entrezgene);Acc:829717]
MTR_4G098850	IP5PII	AT4G18010	myo-inositol polyphosphate 5-phosphatase 2 [Source:NCBI gene (formerly Entrezgene);Acc:827526]
MTR_3G065930	AT5G39790	AT5G39790	PROTEIN TARGETING TO STARCH (PTST) [Source:NCBI gene (formerly Entrezgene);Acc:833975]
MTR_4G091060	FMN/FHY	AT4G21470	riboflavin kinase/FMN hydrolase [Source:NCBI gene (formerly Entrezgene);Acc:828232]
MTR_3G089020	emb2746	AT5G63420	RNA-metabolising metallo-beta-lactamase family protein [Source:NCBI gene (formerly Entrezgene);Acc:836461]
MTR_4G105600	AT5G62960	AT5G62960	UDP-N-acetylglucosamine-N-acetylmuramyl-pyrophosphoryl-undecaprenol N-acetylglucosamine protein [Source:NCBI gene (formerly Entrezgene);Acc:836416]
MTR_7G451010	DL1E	AT3G60190	DYNAMIN-like 1E [Source:NCBI gene (formerly Entrezgene);Acc:825189]
MTR_7G092860	AT1G36280	AT1G36280	L-Aspartase-like family protein [Source:NCBI gene (formerly Entrezgene);Acc:840534]
MTR_8G098400	GPX6	AT4G11600	glutathione peroxidase 6 [Source:NCBI gene (formerly Entrezgene);Acc:826765]
MTR_7G058500	RUS4	AT2G23470	root UVB sensitive protein (Protein of unknown function, DUF647) [Source:NCBI gene (formerly Entrezgene);Acc:816879]
MTR_4G131390	TIL	AT5G58070	temperature-induced lipocalin [Source:NCBI gene (formerly Entrezgene);Acc:835919]
MTR_1G101870	AT1G07920	AT1G07920	GTP binding Elongation factor Tu family protein [Source:NCBI gene (formerly Entrezgene);Acc:837307]
MTR_8G070890	AT1G79620	AT1G79620	Leucine-rich repeat protein kinase family protein [Source:NCBI gene (formerly Entrezgene);Acc:844301]
MTR_3G100960	Plsp2A	AT1G06870	Peptidase S24/S26A/S26B/S26C family protein [Source:NCBI gene (formerly Entrezgene);Acc:837198]
MTR_3G094080	AT3G56290	AT3G56290	potassium transporter [Source:NCBI gene (formerly Entrezgene);Acc:824796]
MTR_2G086600	NLP1	AT2G27450	nitrilase-like protein 1 [Source:NCBI gene (formerly Entrezgene);Acc:817290]
MTR_1G016970	AT2G25910	AT2G25910	3'-5' exonuclease domain-containing protein / K homology domain-containing protein / KH domain-containing protein [Source:NCBI gene (formerly Entrezgene);Acc:817132]
MTR_7G111050	AT1G02300	AT1G02300	Cysteine proteinases superfamily protein [Source:NCBI gene (formerly Entrezgene);Acc:839576]
MTR_4G011340	AT1G52710	AT1G52710	Rubredoxin-like superfamily protein [Source:NCBI gene (formerly Entrezgene);Acc:841704]
MTR_4G471590	GATA3	AT4G34680	GATA transcription factor 3 [Source:NCBI gene (formerly Entrezgene);Acc:829620]
MTR_4G084120	AT1G21065	AT1G21065	secondary thiamine-phosphate synthase enzyme [Source:NCBI gene (formerly Entrezgene);Acc:838701]
MTR_1G034030	OST1	AT4G33950	Protein kinase superfamily protein [Source:NCBI gene (formerly Entrezgene);Acc:829541]
MTR_8G056100	SLD2	AT2G46210	Fatty acid/sphingolipid desaturase [Source:NCBI gene (formerly Entrezgene);Acc:819228]
MTR_3G008260	ACD5	AT5G51290	Diacylglycerol kinase family protein [Source:NCBI gene (formerly Entrezgene);Acc:835203]
MTR_1G041890	PrfB3	AT3G57190	peptide chain release factor [Source:NCBI gene (formerly Entrezgene);Acc:824886]
MTR_1G116540	AT2G43235	AT2G43235	phosphoribosylformylglycinamidine synthase [Source:NCBI gene (formerly Entrezgene);Acc:5007958]
MTR_8G070910	AT1G79620	AT1G79620	Leucine-rich repeat protein kinase family protein [Source:NCBI gene (formerly Entrezgene);Acc:844301]
MTR_1G041390	CLH2	AT5G43860	chlorophyllase 2 [Source:NCBI gene (formerly Entrezgene);Acc:834408]
MTR_1G112270	AT1G14580	AT1G14580	C2H2-like zinc finger protein [Source:NCBI gene (formerly Entrezgene);Acc:838020]
MTR_8G019320	HO4	AT1G58300	heme oxygenase 4 [Source:NCBI gene (formerly Entrezgene);Acc:842199]
MTR_6G007647	HB-1	AT3G01470	homeobox 1 [Source:NCBI gene (formerly Entrezgene);Acc:821138]
MTR_4G068880	PDV2	AT2G16070	plastid division2 [Source:NCBI gene (formerly Entrezgene);Acc:816104]
MTR_5G009830	CDPK6	AT4G23650	calcium-dependent protein kinase 6 [Source:NCBI gene (formerly Entrezgene);Acc:828465]
MTR_3G112150	AT1G19650	AT1G19650	Sec14p-like phosphatidylinositol transfer family protein [Source:NCBI gene (formerly Entrezgene);Acc:838552]
MTR_3G067685	AT3G03440	AT3G03440	ARM repeat superfamily protein [Source:NCBI gene (formerly Entrezgene);Acc:821253]
MTR_3G040090	ABCI15	AT3G20320	trigalactosyldiacylglycerol2 [Source:NCBI gene (formerly Entrezgene);Acc:821576]
MTR_5G009360	LACS3	AT1G64400	AMP-dependent synthetase and ligase family protein [Source:NCBI gene (formerly Entrezgene);Acc:842748]
MTR_1G029520	ACR3	AT1G76990	ACT domain repeat 3 [Source:NCBI gene (formerly Entrezgene);Acc:844035]
MTR_2G027270	PGLP2	AT5G47760	2-phosphoglycolate phosphatase 2 [Source:NCBI gene (formerly Entrezgene);Acc:834827]
MTR_2G018310	AT2G25950	AT2G25950	PITH domain protein (DUF1000) [Source:NCBI gene (formerly Entrezgene);Acc:817136]
MTR_1G069720	CKL6	AT4G28540	casein kinase I-like 6 [Source:NCBI gene (formerly Entrezgene);Acc:828972]
MTR_4G121020	RR1	AT3G16857	response regulator 1 [Source:NCBI gene (formerly Entrezgene);Acc:820940]
MTR_3G100050	ZIM	AT4G24470	GATA-type zinc finger protein with TIFY domain-containing protein [Source:NCBI gene (formerly Entrezgene);Acc:828549]
MTR_4G082940	PAP2	AT1G13900	Purple acid phosphatases superfamily protein [Source:NCBI gene (formerly Entrezgene);Acc:837949]
MTR_3G084510	AT3G23750	AT3G23750	Leucine-rich repeat protein kinase family protein [Source:NCBI gene (formerly Entrezgene);Acc:821957]
MTR_4G055080	hda17	AT3G44490	histone deacetylase 17 [Source:NCBI gene (formerly Entrezgene);Acc:823574]
MTR_8G028080	RNS2	AT2G39780	ribonuclease 2 [Source:NCBI gene (formerly Entrezgene);Acc:818563]
MTR_4G109890	GAUT11	AT1G18580	galacturonosyltransferase 11 [Source:NCBI gene (formerly Entrezgene);Acc:838439]
MTR_7G031450	TPLATE	AT3G01780	ARM repeat superfamily protein [Source:NCBI gene (formerly Entrezgene);Acc:821081]
MTR_1G026590	AT1G21070	AT1G21070	Nucleotide-sugar transporter family protein [Source:NCBI gene (formerly Entrezgene);Acc:838703]
MTR_4G086600	RBP47A	AT1G49600	RNA-binding protein 47A [Source:NCBI gene (formerly Entrezgene);Acc:841384]
MTR_2G037880	AT3G13940	AT3G13940	DNA binding / DNA-directed RNA polymerase [Source:NCBI gene (formerly Entrezgene);Acc:820607]
MTR_7G090740	AT2G41451	AT2G41451	glycosyltransferase-like protein [Source:NCBI gene (formerly Entrezgene);Acc:6241352]
MTR_5G004960	REV1	AT5G44750	DNA-directed DNA polymerase [Source:NCBI gene (formerly Entrezgene);Acc:834504]
MTR_8G088930	AT1G10900	AT1G10900	Phosphatidylinositol-4-phosphate 5-kinase family protein [Source:NCBI gene (formerly Entrezgene);Acc:837633]
MTR_4G077910	CSLD3	AT3G03050	cellulose synthase-like D3 [Source:NCBI gene (formerly Entrezgene);Acc:821148]
MTR_4G098640	AT2G35360	AT2G35360	ubiquitin family protein [Source:NCBI gene (formerly Entrezgene);Acc:818103]
MTR_2G008120	EMB1075	AT1G43710	Pyridoxal phosphate (PLP)-dependent transferases superfamily protein [Source:NCBI gene (formerly Entrezgene);Acc:840958]
MTR_8G038880	AT3G54450	AT3G54450	Major facilitator superfamily protein [Source:NCBI gene (formerly Entrezgene);Acc:2745964]
MTR_4G057795	ABCF1	AT5G60790	ABC transporter family protein [Source:NCBI gene (formerly Entrezgene);Acc:836200]
MTR_6G033130	AT3G24715	AT3G24715	kinase superfamily with octicosapeptide/Phox/Bem1p domain-containing protein [Source:NCBI gene (formerly Entrezgene);Acc:822069]
MTR_8G027425	AT2G46560	AT2G46560	transducin family protein / WD-40 repeat family protein [Source:NCBI gene (formerly Entrezgene);Acc:819268]
MTR_2G065470	GAPCP-2	AT1G16300	glyceraldehyde-3-phosphate dehydrogenase of plastid 2 [Source:NCBI gene (formerly Entrezgene);Acc:838199]
MTR_5G043800	AT5G61240	AT5G61240	Leucine-rich repeat (LRR) family protein [Source:NCBI gene (formerly Entrezgene);Acc:836245]
MTR_3G117580	AT4G38890	AT4G38890	FMN-linked oxidoreductases superfamily protein [Source:NCBI gene (formerly Entrezgene);Acc:830044]
MTR_7G072680	NPU	AT3G51610	ATP-dependent helicase/deoxyribonuclease subunit B [Source:NCBI gene (formerly Entrezgene);Acc:824324]
MTR_1G097110	FAB1D	AT1G34260	FORMS APLOID AND BINUCLEATE CELLS 1A [Source:NCBI gene (formerly Entrezgene);Acc:840326]
MTR_8G015980	ABCC8	AT3G21250	multidrug resistance-associated protein 6 [Source:NCBI gene (formerly Entrezgene);Acc:821679]
MTR_2G094130	AT5G60580	AT5G60580	RING/U-box superfamily protein [Source:NCBI gene (formerly Entrezgene);Acc:836179]
MTR_4G064897	AT4G08190	AT4G08190	P-loop containing nucleoside triphosphate hydrolases superfamily protein [Source:NCBI gene (formerly Entrezgene);Acc:826369]
MTR_5G012060	AT1G62730	AT1G62730	Terpenoid synthases superfamily protein [Source:NCBI gene (formerly Entrezgene);Acc:842571]
MTR_1G099420	AT5G60750	AT5G60750	CAAX amino terminal protease family protein [Source:NCBI gene (formerly Entrezgene);Acc:836196]
MTR_3G462330	SR45a	AT1G07350	RNA-binding (RRM/RBD/RNP motifs) family protein [Source:NCBI gene (formerly Entrezgene);Acc:837246]
MTR_8G022050	UBP1B	AT1G17370	oligouridylate binding protein 1B [Source:NCBI gene (formerly Entrezgene);Acc:838309]
MTR_4G113270	GONST4	AT5G19980	golgi nucleotide sugar transporter 4 [Source:NCBI gene (formerly Entrezgene);Acc:832120]
MTR_2G102283	AT1G52420	AT1G52420	UDP-Glycosyltransferase superfamily protein [Source:NCBI gene (formerly Entrezgene);Acc:841673]
MTR_8G095280	AT5G63640	AT5G63640	ENTH/VHS/GAT family protein [Source:NCBI gene (formerly Entrezgene);Acc:836484]
MTR_4G114160	AT2G26680	AT2G26680	FkbM family methyltransferase [Source:NCBI gene (formerly Entrezgene);Acc:817209]
MTR_8G076890	PLP3a	AT3G50960	thioredoxin domain PLP3A-like protein [Source:NCBI gene (formerly Entrezgene);Acc:824260]
MTR_4G025410	AT3G05100	AT3G05100	S-adenosyl-L-methionine-dependent methyltransferases superfamily protein [Source:NCBI gene (formerly Entrezgene);Acc:819672]
MTR_2G005260	Cand1	AT1G57680	plasminogen activator inhibitor [Source:NCBI gene (formerly Entrezgene);Acc:842144]
MTR_1G107500	AT2G15320	AT2G15320	Leucine-rich repeat (LRR) family protein [Source:NCBI gene (formerly Entrezgene);Acc:816021]
MTR_8G107470	RKL1	AT1G48480	receptor-like kinase 1 [Source:NCBI gene (formerly Entrezgene);Acc:841269]
MTR_8G072360	AT4G19180	AT4G19180	GDA1/CD39 nucleoside phosphatase family protein [Source:NCBI gene (formerly Entrezgene);Acc:827656]
MTR_4G124660	SUS1	AT5G20830	sucrose synthase 1 [Source:NCBI gene (formerly Entrezgene);Acc:832206]
MTR_8G073250	AT4G35500	AT4G35500	Protein kinase superfamily protein [Source:NCBI gene (formerly Entrezgene);Acc:829702]
MTR_5G058140	p24delta5	AT1G21900	emp24/gp25L/p24 family/GOLD family protein [Source:NCBI gene (formerly Entrezgene);Acc:838792]
MTR_6G022320	AT3G01720	AT3G01720	peptidyl serine alpha-galactosyltransferase [Source:NCBI gene (formerly Entrezgene);Acc:821091]
MTR_4G019165	FLN1	AT3G54090	fructokinase-like 1 [Source:NCBI gene (formerly Entrezgene);Acc:824576]
MTR_8G015500	AT1G51770	AT1G51770	Core-2/I-branching beta-1,6-N-acetylglucosaminyltransferase family protein [Source:NCBI gene (formerly Entrezgene);Acc:841603]
MTR_5G025560	AT5G45360	AT5G45360	F-box family protein [Source:NCBI gene (formerly Entrezgene);Acc:834572]
MTR_8G070000	ICME-LIKE1	AT1G26120	alpha/beta-Hydrolases superfamily protein [Source:NCBI gene (formerly Entrezgene);Acc:839153]
MTR_2G009360	SAC51	AT5G64340	transcription factor SAC51 [Source:NCBI gene (formerly Entrezgene);Acc:836555]
MTR_7G117870	FKGP	AT1G01220	L-fucokinase/GDP-L-fucose pyrophosphorylase [Source:NCBI gene (formerly Entrezgene);Acc:839420]
MTR_7G081665	AT2G44830	AT2G44830	Protein kinase superfamily protein [Source:NCBI gene (formerly Entrezgene);Acc:819092]
MTR_8G089840	AT1G12990	AT1G12990	beta-1,4-N-acetylglucosaminyltransferase family protein [Source:NCBI gene (formerly Entrezgene);Acc:837857]
MTR_1G086600	AT2G47245	AT2G47245	long chain acyl-CoA synthetase [Source:NCBI gene (formerly Entrezgene);Acc:28718361]
MTR_8G099605	FtsHi1	AT4G23940	FtsH extracellular protease family [Source:NCBI gene (formerly Entrezgene);Acc:828494]
MTR_4G094572	AT1G29790	AT1G29790	S-adenosyl-L-methionine-dependent methyltransferases superfamily protein [Source:NCBI gene (formerly Entrezgene);Acc:839857]
MTR_5G026680	AT3G45900	AT3G45900	Ribonuclease P protein subunit P38-like protein [Source:NCBI gene (formerly Entrezgene);Acc:823733]
MTR_8G023490	AT1G17270	AT1G17270	O-fucosyltransferase family protein [Source:NCBI gene (formerly Entrezgene);Acc:838298]
MTR_8G023560	SRF6	AT1G53730	STRUBBELIG-receptor family 6 [Source:NCBI gene (formerly Entrezgene);Acc:841811]
MTR_1G081180	AT5G28300	AT5G28300	Duplicated homeodomain-like superfamily protein [Source:NCBI gene (formerly Entrezgene);Acc:832914]
MTR_3G064500	RVE1	AT5G17300	Homeodomain-like superfamily protein [Source:NCBI gene (formerly Entrezgene);Acc:831595]
MTR_2G027140	AT5G47730	AT5G47730	Sec14p-like phosphatidylinositol transfer family protein [Source:NCBI gene (formerly Entrezgene);Acc:834824]
MTR_1G029790	AT1G44120	AT1G44120	CELLULOSE SYNTHASE INTERACTIVE 2 [Source:NCBI gene (formerly Entrezgene);Acc:841015]
MTR_4G077250	AT5G17210	AT5G17210	transmembrane protein, putative (DUF1218) [Source:NCBI gene (formerly Entrezgene);Acc:831585]
MTR_4G108140	IQD30	AT1G18840	IQ-domain 30 [Source:NCBI gene (formerly Entrezgene);Acc:838465]
MTR_3G062610	AT3G58060	AT3G58060	Cation efflux family protein [Source:NCBI gene (formerly Entrezgene);Acc:824975]
MTR_7G055600	QUA1	AT3G25140	Nucleotide-diphospho-sugar transferases superfamily protein [Source:NCBI gene (formerly Entrezgene);Acc:822105]
MTR_2G022180	AT5G19070	AT5G19070	SNARE associated Golgi protein family [Source:NCBI gene (formerly Entrezgene);Acc:832026]
MTR_1G009960	AT4G31350	AT4G31350	Core-2/I-branching beta-1,6-N-acetylglucosaminyltransferase family protein [Source:NCBI gene (formerly Entrezgene);Acc:829262]
MTR_2G084715	AT3G44785	AT3G44785	Zinc finger C-x8-C-x5-C-x3-H type family protein [Source:NCBI gene (formerly Entrezgene);Acc:2745945]
MTR_1G075790	AT5G43230	AT5G43230	EEIG1/EHBP1 protein amino-terminal domain protein [Source:NCBI gene (formerly Entrezgene);Acc:834341]
MTR_8G010160	AT5G48385	AT5G48385	FRIGIDA-like protein [Source:NCBI gene (formerly Entrezgene);Acc:834893]
MTR_7G068440	AT3G08930	AT3G08930	LMBR1-like membrane protein [Source:NCBI gene (formerly Entrezgene);Acc:820042]
MTR_7G085090	APY1	AT3G04080	apyrase 1 [Source:NCBI gene (formerly Entrezgene);Acc:819563]
MTR_2G044070	SUS4	AT3G43190	sucrose synthase 4 [Source:NCBI gene (formerly Entrezgene);Acc:823393]
MTR_2G096160	HERK1	AT3G46290	hercules receptor kinase 1 [Source:NCBI gene (formerly Entrezgene);Acc:823774]
MTR_1G076690	TBL18	AT4G25360	TRICHOME BIREFRINGENCE-LIKE 18 [Source:NCBI gene (formerly Entrezgene);Acc:828639]
MTR_1G113850	MSL4	AT1G53470	mechanosensitive channel of small conductance-like 4 [Source:NCBI gene (formerly Entrezgene);Acc:841782]
MTR_5G004720	RAD54	AT3G19210	DNA repair/recombination protein [Source:NCBI gene (formerly Entrezgene);Acc:821455]
MTR_0019S0020	ABCC10	AT3G59140	multidrug resistance-associated protein 14 [Source:NCBI gene (formerly Entrezgene);Acc:825083]
MTR_0291S0010	FTIP1	AT5G06850	C2 calcium/lipid-binding plant phosphoribosyltransferase family protein [Source:NCBI gene (formerly Entrezgene);Acc:830576]
MTR_1G084100	TPR5	AT1G56440	Tetratricopeptide repeat (TPR)-like superfamily protein [Source:NCBI gene (formerly Entrezgene);Acc:842097]
MTR_2G099490	NF-YA8	AT1G17590	nuclear factor Y, subunit A8 [Source:NCBI gene (formerly Entrezgene);Acc:838335]
MTR_3G104940	AT1G49260	AT1G49260	mechanosensitive ion channel-like protein [Source:NCBI gene (formerly Entrezgene);Acc:841350]
MTR_5G083150	AT2G40280	AT2G40280	S-adenosyl-L-methionine-dependent methyltransferases superfamily protein [Source:NCBI gene (formerly Entrezgene);Acc:818620]
MTR_5G016600	IRX14	AT4G36890	Nucleotide-diphospho-sugar transferases superfamily protein [Source:NCBI gene (formerly Entrezgene);Acc:829842]
MTR_2G100110	BGAL1	AT3G13750	beta galactosidase 1 [Source:NCBI gene (formerly Entrezgene);Acc:820584]
MTR_5G067470	SUT4	AT1G09960	sucrose transporter 4 [Source:NCBI gene (formerly Entrezgene);Acc:837530]
MTR_6G042530	SIRANBP	AT1G07140	Pleckstrin homology (PH) domain superfamily protein [Source:NCBI gene (formerly Entrezgene);Acc:837225]
MTR_7G079510	AT5G16520	AT5G16520	transmembrane protein [Source:NCBI gene (formerly Entrezgene);Acc:831514]
MTR_8G085780	SUB1	AT4G08810	calcium ion binding protein [Source:NCBI gene (formerly Entrezgene);Acc:826452]
MTR_2G035820	AT3G17365	AT3G17365	S-adenosyl-L-methionine-dependent methyltransferases superfamily protein [Source:NCBI gene (formerly Entrezgene);Acc:821000]
MTR_4G073080	MSI2	AT2G16780	Transducin family protein / WD-40 repeat family protein [Source:NCBI gene (formerly Entrezgene);Acc:816179]
MTR_1G046740	AT3G24040	AT3G24040	Core-2/I-branching beta-1,6-N-acetylglucosaminyltransferase family protein [Source:NCBI gene (formerly Entrezgene);Acc:821989]
MTR_8G092190	NST-K1	AT4G39390	nucleotide sugar transporter-KT 1 [Source:NCBI gene (formerly Entrezgene);Acc:830094]
MTR_1G107135	FUC95A	AT4G34260	1,2-alpha-L-fucosidase [Source:NCBI gene (formerly Entrezgene);Acc:829575]
MTR_8G021310	AT1G72480	AT1G72480	Lung seven transmembrane receptor family protein [Source:NCBI gene (formerly Entrezgene);Acc:843580]
MTR_1G075900	AT1G04430	AT1G04430	S-adenosyl-L-methionine-dependent methyltransferases superfamily protein [Source:NCBI gene (formerly Entrezgene);Acc:839522]
MTR_4G134190	AT1G03370	AT1G03370	C2 calcium/lipid-binding and GRAM domain containing protein [Source:NCBI gene (formerly Entrezgene);Acc:839519]
MTR_2G069340	REV7	AT1G16590	DNA-binding HORMA family protein [Source:NCBI gene (formerly Entrezgene);Acc:838228]
MTR_4G121880	LPD1	AT3G16950	lipoamide dehydrogenase 1 [Source:NCBI gene (formerly Entrezgene);Acc:820951]
MTR_3G086000	AT1G67690	AT1G67690	Zincin-like metalloproteases family protein [Source:NCBI gene (formerly Entrezgene);Acc:843094]
MTR_1008S0010	ABCC9	AT3G60160	multidrug resistance-associated protein 9 [Source:NCBI gene (formerly Entrezgene);Acc:825186]
MTR_1G067530	UXS1	AT3G53520	UDP-glucuronic acid decarboxylase 1 [Source:NCBI gene (formerly Entrezgene);Acc:824520]
MTR_3G030040	CEV1	AT5G05170	Cellulose synthase family protein [Source:NCBI gene (formerly Entrezgene);Acc:830399]
MTR_6G004020	AT5G08570	AT5G08570	Pyruvate kinase family protein [Source:NCBI gene (formerly Entrezgene);Acc:830758]
MTR_3G449620	PAO2	AT2G43020	polyamine oxidase 2 [Source:NCBI gene (formerly Entrezgene);Acc:818904]
MTR_2G090120	SRF3	AT4G03390	STRUBBELIG-receptor family 3 [Source:NCBI gene (formerly Entrezgene);Acc:827941]
MTR_1G021040	AT5G42690	AT5G42690	transcription factor, putative (Protein of unknown function, DUF547) [Source:NCBI gene (formerly Entrezgene);Acc:834278]
MTR_5G077770	SKOR	AT3G02850	STELAR K+ outward rectifier [Source:NCBI gene (formerly Entrezgene);Acc:821052]
MTR_4G074200	XRCC2	AT5G64520	homolog of X-ray repair cross complementing 2 (XRCC2) [Source:NCBI gene (formerly Entrezgene);Acc:836573]
MTR_6G046960	CDI	AT1G64980	Nucleotide-diphospho-sugar transferases superfamily protein [Source:NCBI gene (formerly Entrezgene);Acc:842806]
MTR_8G024260	PRR9	AT2G46790	pseudo-response regulator 9 [Source:NCBI gene (formerly Entrezgene);Acc:819292]
MTR_8G102500	AT2G19880	AT2G19880	Nucleotide-diphospho-sugar transferases superfamily protein [Source:NCBI gene (formerly Entrezgene);Acc:816507]
MTR_1G070190	AT3G23175	AT3G23175	HR-like lesion-inducing protein-like protein [Source:NCBI gene (formerly Entrezgene);Acc:821895]
MTR_4G058970	REV	AT5G60690	Homeobox-leucine zipper family protein / lipid-binding START domain-containing protein [Source:NCBI gene (formerly Entrezgene);Acc:836190]
MTR_4G123910	NPSN12	AT1G48240	Putative plant snare 12 [Source:NCBI gene (formerly Entrezgene);Acc:841244]
MTR_2G028620	AT2G02400	AT2G02400	NAD(P)-binding Rossmann-fold superfamily protein [Source:NCBI gene (formerly Entrezgene);Acc:814771]
MTR_8G098260	AT4G11450	AT4G11450	bromo-adjacent domain protein, putative (DUF3527) [Source:NCBI gene (formerly Entrezgene);Acc:826749]
MTR_7G026520	AT3G26950	AT3G26950	transmembrane protein [Source:NCBI gene (formerly Entrezgene);Acc:822313]
MTR_5G024780	PIRL3	AT1G12970	plant intracellular ras group-related LRR 3 [Source:NCBI gene (formerly Entrezgene);Acc:837855]
MTR_2G006330	SNRK2.10	AT1G60940	SNF1-related protein kinase 2.10 [Source:NCBI gene (formerly Entrezgene);Acc:842385]
MTR_5G091900	AT5G16550	AT5G16550	voltage-dependent L-type calcium channel subunit [Source:NCBI gene (formerly Entrezgene);Acc:831517]
MTR_2G100400	AT1G18940	AT1G18940	Nodulin-like / Major Facilitator Superfamily protein [Source:NCBI gene (formerly Entrezgene);Acc:838475]
MTR_7G077800	SPPL4	AT1G01650	SIGNAL PEPTIDE PEPTIDASE-LIKE 4 [Source:NCBI gene (formerly Entrezgene);Acc:839499]
MTR_6G087910	AT1G67300	AT1G67300	Major facilitator superfamily protein [Source:NCBI gene (formerly Entrezgene);Acc:843050]
MTR_1G054335	SINAT2	AT3G58040	seven in absentia of Arabidopsis 2 [Source:NCBI gene (formerly Entrezgene);Acc:824973]
MTR_8G071280	ERD3	AT4G19120	S-adenosyl-L-methionine-dependent methyltransferases superfamily protein [Source:NCBI gene (formerly Entrezgene);Acc:827650]
MTR_5G045310	SPR1	AT2G03680	spiral1 [Source:NCBI gene (formerly Entrezgene);Acc:814896]
MTR_2G450550	AT2G12400	AT2G12400	plasma membrane fusion protein [Source:NCBI gene (formerly Entrezgene);Acc:815712]
MTR_4G061833	AT5G59700	AT5G59700	Protein kinase superfamily protein [Source:NCBI gene (formerly Entrezgene);Acc:836091]
MTR_3G104120	ALPHA-VPE	AT2G25940	alpha-vacuolar processing enzyme [Source:NCBI gene (formerly Entrezgene);Acc:817135]
MTR_5G023050	PLDDELTA	AT4G35790	phospholipase D delta [Source:NCBI gene (formerly Entrezgene);Acc:829733]
MTR_4G122750	C/VIF1	AT1G47960	cell wall / vacuolar inhibitor of fructosidase 1 [Source:NCBI gene (formerly Entrezgene);Acc:841214]
MTR_1G071810	AT4G02715	AT4G02715	flocculation FLO11-like protein [Source:NCBI gene (formerly Entrezgene);Acc:828194]
MTR_8G076060	MSRA5	AT2G18030	Peptide methionine sulfoxide reductase family protein [Source:NCBI gene (formerly Entrezgene);Acc:816315]
MTR_4G046870	AT3G21710	AT3G21710	transmembrane protein [Source:NCBI gene (formerly Entrezgene);Acc:821725]
MTR_4G122270	MCM2	AT1G44900	minichromosome maintenance (MCM2/3/5) family protein [Source:NCBI gene (formerly Entrezgene);Acc:841056]
MTR_3G464000	AT1G07220	AT1G07220	O-glucosyltransferase rumi-like protein (DUF821) [Source:NCBI gene (formerly Entrezgene);Acc:837233]
MTR_2G044600	AT1G34630	AT1G34630	transmembrane protein [Source:NCBI gene (formerly Entrezgene);Acc:840367]
MTR_5G016550	PEN3	AT3G50110	PTEN 3 [Source:NCBI gene (formerly Entrezgene);Acc:824173]
MTR_1G109060	AT1G71140	AT1G71140	MATE efflux family protein [Source:NCBI gene (formerly Entrezgene);Acc:843454]
MTR_4G036110	BAG7	AT5G62390	BCL-2-associated athano 7 [Source:NCBI gene (formerly Entrezgene);Acc:836360]
MTR_5G020890	MAN7	AT5G66460	Glycosyl hydrolase superfamily protein [Source:NCBI gene (formerly Entrezgene);Acc:836778]
MTR_8G023780	PAP14	AT2G46880	purple acid phosphatase 14 [Source:NCBI gene (formerly Entrezgene);Acc:819301]
MTR_6G081930	AT5G42860	AT5G42860	late embryosis abundant protein, group 2 [Source:NCBI gene (formerly Entrezgene);Acc:834297]
MTR_4G023000	BGLU14	AT2G25630	beta glucosidase 14 [Source:NCBI gene (formerly Entrezgene);Acc:817104]
MTR_3G113290	AT1G19835	AT1G19835	filament-like protein (DUF869) [Source:NCBI gene (formerly Entrezgene);Acc:838571]
MTR_8G092590	CESA9	AT2G21770	cellulose synthase A9 [Source:NCBI gene (formerly Entrezgene);Acc:816713]
MTR_3G098980	DCF	AT3G48720	HXXXD-type acyl-transferase family protein [Source:NCBI gene (formerly Entrezgene);Acc:824033]
MTR_3G091650	AT5G53020	AT5G53020	Ribonuclease P protein subunit P38-like protein [Source:NCBI gene (formerly Entrezgene);Acc:835381]
MTR_7G053107	AT3G07460	AT3G07460	transmembrane protein, putative (Protein of unknown function, DUF538) [Source:NCBI gene (formerly Entrezgene);Acc:819934]
MTR_5G033800	TBL2	AT1G60790	trichome birefringence-like protein (DUF828) [Source:NCBI gene (formerly Entrezgene);Acc:842373]
MTR_2G038720	CGA1	AT4G26150	cytokinin-responsive gata factor 1 [Source:NCBI gene (formerly Entrezgene);Acc:828721]
MTR_5G080700	EMB3120	AT3G14900
MTR_4G088210	ETT	AT2G33860	Transcriptional factor B3 family protein / auxin-responsive factor AUX/IAA-like protein [Source:NCBI gene (formerly Entrezgene);Acc:817956]
MTR_8G095490	AT5G07400	AT5G07400	forkhead-associated domain-containing protein / FHA domain-containing protein [Source:NCBI gene (formerly Entrezgene);Acc:830631]
MTR_2G102150	AT1G79950	AT1G79950	RAD3-like DNA-binding helicase protein [Source:NCBI gene (formerly Entrezgene);Acc:844335]
MTR_3G051240	PAP18	AT3G20500	purple acid phosphatase 18 [Source:NCBI gene (formerly Entrezgene);Acc:821596]
MTR_8G040640	AT3G12320	AT3G12320
MTR_7G116890	GBF3	AT2G46270	G-box binding factor 3 [Source:NCBI gene (formerly Entrezgene);Acc:819235]
MTR_4G049540	AT5G42570	AT5G42570	B-cell receptor-associated 31-like protein [Source:NCBI gene (formerly Entrezgene);Acc:834264]
MTR_4G019800	AT3G53990	AT3G53990	Adenine nucleotide alpha hydrolases-like superfamily protein [Source:NCBI gene (formerly Entrezgene);Acc:824566]
MTR_4G077740	VGT1	AT3G03090	vacuolar glucose transporter 1 [Source:NCBI gene (formerly Entrezgene);Acc:821117]
MTR_7G117505	AT3G14360	AT3G14360	alpha/beta-Hydrolases superfamily protein [Source:NCBI gene (formerly Entrezgene);Acc:820657]
MTR_7G050860	TDP1	AT5G15170	tyrosyl-DNA phosphodiesterase-like protein [Source:NCBI gene (formerly Entrezgene);Acc:831369]
MTR_6G085070	AT1G18460	AT1G18460	alpha/beta-Hydrolases superfamily protein [Source:NCBI gene (formerly Entrezgene);Acc:838426]
MTR_2G094620	AT2G28320	AT2G28320	Pleckstrin homology (PH) and lipid-binding START domains-containing protein [Source:NCBI gene (formerly Entrezgene);Acc:817379]
MTR_1G019750	BKI1	AT5G42750	BRI1 kinase inhibitor 1 [Source:NCBI gene (formerly Entrezgene);Acc:834284]
MTR_5G079860	AT2G39670	AT2G39670	Radical SAM superfamily protein [Source:NCBI gene (formerly Entrezgene);Acc:818550]
MTR_7G106760	FLA16	AT2G35860	FASCICLIN-like arabinogalactan protein 16 [Source:NCBI gene (formerly Entrezgene);Acc:818159]
MTR_7G097060	SETH3	AT3G54690	Sugar isomerase (SIS) family protein [Source:NCBI gene (formerly Entrezgene);Acc:824634]
MTR_1G076470	EXL5	AT2G17230	EXORDIUM like 5 [Source:NCBI gene (formerly Entrezgene);Acc:816228]
MTR_1G097460	HGPT	AT1G71750	Hypoxanthine-guanine phosphoribosyltransferase [Source:NCBI gene (formerly Entrezgene);Acc:843505]
MTR_4G125010	AT5G20670	AT5G20670	DUF1677 family protein (DUF1677) [Source:NCBI gene (formerly Entrezgene);Acc:832190]
MTR_3G084110	INT1	AT2G43330	inositol transporter 1 [Source:NCBI gene (formerly Entrezgene);Acc:818934]
MTR_7G091880	SIP2	AT3G57520	seed imbibition 2 [Source:NCBI gene (formerly Entrezgene);Acc:824919]
MTR_5G020510	HB28	AT3G50890	homeobox protein 28 [Source:NCBI gene (formerly Entrezgene);Acc:824253]
MTR_4G092590	BCAT7	AT1G50090	D-aminoacid aminotransferase-like PLP-dependent enzymes superfamily protein [Source:NCBI gene (formerly Entrezgene);Acc:841432]
MTR_5G017290	AT4G36970	AT4G36970	Remorin family protein [Source:NCBI gene (formerly Entrezgene);Acc:829851]
MTR_6G069830	AT3G17950	AT3G17950	transmembrane protein [Source:NCBI gene (formerly Entrezgene);Acc:820807]
MTR_4G107940	ALDH12A1	AT5G62530	aldehyde dehydrogenase 12A1 [Source:NCBI gene (formerly Entrezgene);Acc:836373]
MTR_5G075060	SIP1	AT5G58380	SOS3-interacting protein 1 [Source:NCBI gene (formerly Entrezgene);Acc:835951]
MTR_0196S0020	ABCC10	AT3G59140	multidrug resistance-associated protein 14 [Source:NCBI gene (formerly Entrezgene);Acc:825083]
MTR_5G007050	CDI	AT1G64980	Nucleotide-diphospho-sugar transferases superfamily protein [Source:NCBI gene (formerly Entrezgene);Acc:842806]
MTR_5G036580	LGT9	AT1G24170	Nucleotide-diphospho-sugar transferases superfamily protein [Source:NCBI gene (formerly Entrezgene);Acc:839030]
MTR_8G072000	AT4G19420	AT4G19420	Pectinacetylesterase family protein [Source:NCBI gene (formerly Entrezgene);Acc:827683]
MTR_5G044540	AT1G13820	AT1G13820	alpha/beta-Hydrolases superfamily protein [Source:NCBI gene (formerly Entrezgene);Acc:837943]
MTR_4G120730	AT3G06770	AT3G06770	Pectin lyase-like superfamily protein [Source:NCBI gene (formerly Entrezgene);Acc:819862]
MTR_1G083400	SR30	AT1G09140	SERINE-ARGININE PROTEIN 30 [Source:NCBI gene (formerly Entrezgene);Acc:837433]
MTR_1G442840	AT4G14360	AT4G14360	S-adenosyl-L-methionine-dependent methyltransferases superfamily protein [Source:NCBI gene (formerly Entrezgene);Acc:827079]
MTR_4G075500	AT2G21180	AT2G21180	transmembrane protein [Source:NCBI gene (formerly Entrezgene);Acc:816653]
MTR_3G073100	PIP5K1	AT1G21980	phosphatidylinositol-4-phosphate 5-kinase 1 [Source:NCBI gene (formerly Entrezgene);Acc:838801]
MTR_7G099270	AT4G28706	AT4G28706	pfkB-like carbohydrate kinase family protein [Source:NCBI gene (formerly Entrezgene);Acc:828990]
MTR_4G129820	GAE1	AT4G30440	UDP-D-glucuronate 4-epimerase 1 [Source:NCBI gene (formerly Entrezgene);Acc:829167]
MTR_4G126270	AT5G56890	AT5G56890	Protein kinase superfamily protein [Source:NCBI gene (formerly Entrezgene);Acc:835791]
MTR_1G095070	PIP2E	AT2G39010	plasma membrane intrinsic protein 2E [Source:NCBI gene (formerly Entrezgene);Acc:818487]
MTR_8G093840	ABCG5	AT2G13610	ABC-2 type transporter family protein [Source:NCBI gene (formerly Entrezgene);Acc:815846]
MTR_4G097790	AT4G37820	AT4G37820	transmembrane protein [Source:NCBI gene (formerly Entrezgene);Acc:829938]
MTR_5G012900	MSH4	AT4G17380	MUTS-like protein 4 [Source:NCBI gene (formerly Entrezgene);Acc:827450]
MTR_7G072605	SR1	AT5G01820	serine/threonine protein kinase 1 [Source:NCBI gene (formerly Entrezgene);Acc:831765]
MTR_4G024600	GAE2	AT1G02000	UDP-D-glucuronate 4-epimerase 2 [Source:NCBI gene (formerly Entrezgene);Acc:839289]
MTR_6G452990	HSP90.1	AT5G52640	heat shock-like protein [Source:NCBI gene (formerly Entrezgene);Acc:835341]
MTR_2G025160	MRB1	AT4G22270	transmembrane protein, putative (DUF3537) [Source:NCBI gene (formerly Entrezgene);Acc:828322]
MTR_7G073660	FER	AT3G51550	Malectin/receptor-like protein kinase family protein [Source:NCBI gene (formerly Entrezgene);Acc:824318]
MTR_1G101130	TUB8	AT5G23860	tubulin beta 8 [Source:NCBI gene (formerly Entrezgene);Acc:832451]
MTR_4G118590	NSH3	AT5G18860	inosine-uridine preferring nucleoside hydrolase family protein [Source:NCBI gene (formerly Entrezgene);Acc:832004]
MTR_2G028480	GH9A3	AT4G24260	glycosyl hydrolase 9A3 [Source:NCBI gene (formerly Entrezgene);Acc:828527]
MTR_3G116860	APL4	AT2G21590	Glucose-1-phosphate adenylyltransferase family protein [Source:NCBI gene (formerly Entrezgene);Acc:816697]
MTR_7G012260	DND1	AT5G15410	Cyclic nucleotide-regulated ion channel family protein [Source:NCBI gene (formerly Entrezgene);Acc:831393]
MTR_5G023680	CYP83A1	AT4G13770	cytochrome P450, family 83, subfamily A, polypeptide 1 [Source:NCBI gene (formerly Entrezgene);Acc:827011]
MTR_7G021130	scpl46	AT2G33530	serine carboxypeptidase-like 46 [Source:NCBI gene (formerly Entrezgene);Acc:817918]
MTR_4G127770	ATKRS-1	AT3G11710	lysyl-tRNA synthetase 1 [Source:NCBI gene (formerly Entrezgene);Acc:820343]
MTR_3G054010	AT1G50630	AT1G50630	extracellular ligand-gated ion channel protein (DUF3537) [Source:NCBI gene (formerly Entrezgene);Acc:841485]
MTR_7G021640	POM1	AT1G05850	Chitinase family protein [Source:NCBI gene (formerly Entrezgene);Acc:837095]
MTR_1G025560	ABCB13	AT1G27940	P-glycoprotein 13 [Source:NCBI gene (formerly Entrezgene);Acc:839687]
MTR_0004S0650	G3Pp1	AT3G47420	putative glycerol-3-phosphate transporter 1 [Source:NCBI gene (formerly Entrezgene);Acc:823896]
MTR_8G075010	AT4G35880	AT4G35880	Eukaryotic aspartyl protease family protein [Source:NCBI gene (formerly Entrezgene);Acc:829742]
MTR_4G129560	P1R1	AT5G57780	transcription factor [Source:NCBI gene (formerly Entrezgene);Acc:835886]
MTR_4G058740	LOG1	AT2G28305	Putative lysine decarboxylase family protein [Source:NCBI gene (formerly Entrezgene);Acc:817376]
MTR_7G100430	AT3G09550	AT3G09550	Ankyrin repeat family protein [Source:NCBI gene (formerly Entrezgene);Acc:820112]
MTR_8G075140	EMB3006	AT4G19350	embryo defective 3006 [Source:NCBI gene (formerly Entrezgene);Acc:827676]
MTR_5G083750	ALPHA-SNAP2	AT3G56190	alpha-soluble NSF attachment protein 2 [Source:NCBI gene (formerly Entrezgene);Acc:824785]
MTR_4G102380	MYB99	AT5G62320	myb domain protein 99 [Source:NCBI gene (formerly Entrezgene);Acc:836353]
MTR_2G010160	AT5G09620	AT5G09620	Octicosapeptide/Phox/Bem1p family protein [Source:NCBI gene (formerly Entrezgene);Acc:830821]
MTR_8G101540	GalAK	AT3G10700	galacturonic acid kinase [Source:NCBI gene (formerly Entrezgene);Acc:820239]
MTR_1G013440	AT5G39600	AT5G39600	39S ribosomal protein [Source:NCBI gene (formerly Entrezgene);Acc:833956]
MTR_3G108240	AT5G25560	AT5G25560	CHY-type/CTCHY-type/RING-type Zinc finger protein [Source:NCBI gene (formerly Entrezgene);Acc:832631]
MTR_7G111600	AT1G29380	AT1G29380	Carbohydrate-binding X8 domain superfamily protein [Source:NCBI gene (formerly Entrezgene);Acc:839813]
MTR_7G005910	INT1	AT2G43330	inositol transporter 1 [Source:NCBI gene (formerly Entrezgene);Acc:818934]
MTR_4G099130	AT4G17660	AT4G17660	Protein kinase superfamily protein [Source:NCBI gene (formerly Entrezgene);Acc:827486]
MTR_7G100730	RIP3	AT3G53350	ROP interactive partner 4 [Source:NCBI gene (formerly Entrezgene);Acc:824503]
MTR_7G111350	RCI2B	AT3G05890	Low temperature and salt responsive protein family [Source:NCBI gene (formerly Entrezgene);Acc:819758]
MTR_5G032660	AT5G65400	AT5G65400	alpha/beta-Hydrolases superfamily protein [Source:NCBI gene (formerly Entrezgene);Acc:836665]
MTR_5G062320	AT1G78060	AT1G78060	Glycosyl hydrolase family protein [Source:NCBI gene (formerly Entrezgene);Acc:844141]
MTR_5G041380	CDF2	AT5G39660	cycling DOF factor 2 [Source:NCBI gene (formerly Entrezgene);Acc:833962]
MTR_5G088990	ENODL18	AT1G08500	early nodulin-like protein 18 [Source:NCBI gene (formerly Entrezgene);Acc:837371]
MTR_5G077850	AT1G66180	AT1G66180	Eukaryotic aspartyl protease family protein [Source:NCBI gene (formerly Entrezgene);Acc:842933]
MTR_8G101260	PRK1	AT5G35390	Leucine-rich repeat protein kinase family protein [Source:NCBI gene (formerly Entrezgene);Acc:833500]
MTR_5G080680	PP2CA	AT3G11410	protein phosphatase 2CA [Source:NCBI gene (formerly Entrezgene);Acc:820314]
MTR_3G068200	PP2CA	AT3G11410	protein phosphatase 2CA [Source:NCBI gene (formerly Entrezgene);Acc:820314]
MTR_3G053220	EMB2729	AT3G20440	Alpha amylase family protein [Source:NCBI gene (formerly Entrezgene);Acc:821589]
MTR_2G085065	AT3G44610	AT3G44610	Protein kinase superfamily protein [Source:NCBI gene (formerly Entrezgene);Acc:823587]
MTR_3G031830	LSH6	AT1G07090
MTR_5G076960	RVE1	AT5G17300	Homeodomain-like superfamily protein [Source:NCBI gene (formerly Entrezgene);Acc:831595]
MTR_2G025180	EHD2	AT4G05520	EPS15 homology domain 2 [Source:NCBI gene (formerly Entrezgene);Acc:825902]
MTR_3G069720	AT5G05840	AT5G05840	replication factor C subunit, putative (DUF620) [Source:NCBI gene (formerly Entrezgene);Acc:830469]
MTR_1G088480	UXS4	AT2G47650	UDP-xylose synthase 4 [Source:NCBI gene (formerly Entrezgene);Acc:819378]
MTR_5G080720	AT2G39750	AT2G39750	S-adenosyl-L-methionine-dependent methyltransferases superfamily protein [Source:NCBI gene (formerly Entrezgene);Acc:818560]
MTR_8G464760	AT4G27350	AT4G27350	membrane lipoprotein lipid attachment site-like protein, putative (DUF1223) [Source:NCBI gene (formerly Entrezgene);Acc:828843]
MTR_3G096900	BGAL10	AT5G63810	beta-galactosidase 10 [Source:NCBI gene (formerly Entrezgene);Acc:836501]
MTR_3G054130	EHD1	AT3G20290	EPS15 homology domain 1 [Source:NCBI gene (formerly Entrezgene);Acc:821573]
MTR_3G088790	AT1G29470	AT1G29470	S-adenosyl-L-methionine-dependent methyltransferases superfamily protein [Source:NCBI gene (formerly Entrezgene);Acc:839823]
MTR_6G012450	CDF2	AT5G39660	cycling DOF factor 2 [Source:NCBI gene (formerly Entrezgene);Acc:833962]
MTR_7G090160	P5CR	AT5G14800	pyrroline-5- carboxylate (P5C) reductase [Source:NCBI gene (formerly Entrezgene);Acc:831332]
MTR_4G107510	NRT1.9	AT1G18880	Major facilitator superfamily protein [Source:NCBI gene (formerly Entrezgene);Acc:838469]
MTR_3G108080	emb2410	AT2G25660	embryo defective 2410 [Source:NCBI gene (formerly Entrezgene);Acc:817107]
MTR_4G107110	AT5G62580	AT5G62580	ARM repeat superfamily protein [Source:NCBI gene (formerly Entrezgene);Acc:836379]
MTR_4G131020	AT5G58160	AT5G58160	actin binding protein [Source:NCBI gene (formerly Entrezgene);Acc:835928]
MTR_8G020510	AT1G72570	AT1G72570	Integrase-type DNA-binding superfamily protein [Source:NCBI gene (formerly Entrezgene);Acc:843589]
MTR_3G073990	SAH7	AT4G08685	Pollen Ole e 1 allergen and extensin family protein [Source:NCBI gene (formerly Entrezgene);Acc:826435]
MTR_6G092660	CDA1	AT2G19570	cytidine deaminase 1 [Source:NCBI gene (formerly Entrezgene);Acc:816476]
MTR_1G105430	AT1G61795	AT1G61795	PAK-box/P21-Rho-binding family protein [Source:NCBI gene (formerly Entrezgene);Acc:5007827]
MTR_1G026750	AT5G11570	AT5G11570	Major facilitator superfamily protein [Source:NCBI gene (formerly Entrezgene);Acc:831029]
MTR_1G043760	AT1G04350	AT1G04350	2-oxoglutarate (2OG) and Fe(II)-dependent oxygenase superfamily protein [Source:NCBI gene (formerly Entrezgene);Acc:839542]
MTR_3G099010	HVA22D	AT4G24960	HVA22 homologue D [Source:NCBI gene (formerly Entrezgene);Acc:828598]
MTR_5G017800	AT3G50590	AT3G50590	Transducin/WD40 repeat-like superfamily protein [Source:NCBI gene (formerly Entrezgene);Acc:824223]
MTR_8G027900	TBL25	AT1G01430	TRICHOME BIREFRINGENCE-LIKE 25 [Source:NCBI gene (formerly Entrezgene);Acc:837247]
MTR_7G068290	AIRP2	AT5G01520	RING/U-box superfamily protein [Source:NCBI gene (formerly Entrezgene);Acc:831747]
MTR_4G096690	KASI	AT5G46290	3-ketoacyl-acyl carrier protein synthase I [Source:NCBI gene (formerly Entrezgene);Acc:834671]
MTR_5G098060	FLA7	AT2G04780	FASCICLIN-like arabinoogalactan 7 [Source:NCBI gene (formerly Entrezgene);Acc:815021]
MTR_3G078270	AT5G49990	AT5G49990	Xanthine/uracil permease family protein [Source:NCBI gene (formerly Entrezgene);Acc:835063]
MTR_5G041400	CDF2	AT5G39660	cycling DOF factor 2 [Source:NCBI gene (formerly Entrezgene);Acc:833962]
MTR_0288S0040	PHS1	AT3G29320	Glycosyl transferase, family 35 [Source:NCBI gene (formerly Entrezgene);Acc:822590]
MTR_2G022880	TOM1	AT4G21790	tobamovirus multiplication 1 [Source:NCBI gene (formerly Entrezgene);Acc:828267]
MTR_5G005430	AT4G33740	AT4G33740	myb-like protein X [Source:NCBI gene (formerly Entrezgene);Acc:829516]
MTR_5G062370	AT1G78060	AT1G78060	Glycosyl hydrolase family protein [Source:NCBI gene (formerly Entrezgene);Acc:844141]
MTR_5G044530	AT1G13830	AT1G13830	Carbohydrate-binding X8 domain superfamily protein [Source:NCBI gene (formerly Entrezgene);Acc:837944]
MTR_3G084240	SAUR29	AT3G03820	SAUR-like auxin-responsive protein family [Source:NCBI gene (formerly Entrezgene);Acc:28718697]
MTR_1G102430	GT18	AT5G62220	glycosyltransferase 18 [Source:NCBI gene (formerly Entrezgene);Acc:836343]
MTR_7G109210	GATL5	AT1G02720	galacturonosyltransferase 5 [Source:NCBI gene (formerly Entrezgene);Acc:839475]
MTR_2G018780	ERD4	AT1G30360	Early-responsive to dehydration stress protein (ERD4) [Source:NCBI gene (formerly Entrezgene);Acc:839916]
MTR_2G078620	AT1G53180	AT1G53180
MTR_8G089180	MUR4	AT1G30620	NAD(P)-binding Rossmann-fold superfamily protein [Source:NCBI gene (formerly Entrezgene);Acc:839942]
MTR_3G091380	PMEPCRF	AT5G53370	pectin methylesterase PCR fragment F [Source:NCBI gene (formerly Entrezgene);Acc:835418]
MTR_8G058547	NLA	AT1G02860	SPX (SYG1/Pho81/XPR1) domain-containing protein [Source:NCBI gene (formerly Entrezgene);Acc:839559]
MTR_2G038410	AT5G57100	AT5G57100	Nucleotide/sugar transporter family protein [Source:NCBI gene (formerly Entrezgene);Acc:835814]
MTR_7G050445	chr31	AT1G05490	chromatin remodeling 31 [Source:NCBI gene (formerly Entrezgene);Acc:837051]
MTR_8G059150	ABCG9	AT4G27420	ABC-2 type transporter family protein [Source:NCBI gene (formerly Entrezgene);Acc:828850]
MTR_5G010330	AT1G63470	AT1G63470	AT hook motif DNA-binding family protein [Source:NCBI gene (formerly Entrezgene);Acc:842653]
MTR_1G114070	IBM1	AT3G07610	Transcription factor jumonji (jmjC) domain-containing protein [Source:NCBI gene (formerly Entrezgene);Acc:819952]
MTR_1G037580	CYP707A2	AT2G29090	cytochrome P450, family 707, subfamily A, polypeptide 2 [Source:NCBI gene (formerly Entrezgene);Acc:817457]
MTR_1G024095	AT1G47900	AT1G47900	filament-like protein (DUF869) [Source:NCBI gene (formerly Entrezgene);Acc:841207]
MTR_5G064040	AT1G78230	AT1G78230	Outer arm dynein light chain 1 protein [Source:NCBI gene (formerly Entrezgene);Acc:844159]
MTR_6G007110	KLCR2	AT3G27960	Tetratricopeptide repeat (TPR)-like superfamily protein [Source:NCBI gene (formerly Entrezgene);Acc:822420]
MTR_7G458880	LAC17	AT5G60020	laccase 17 [Source:NCBI gene (formerly Entrezgene);Acc:836124]
MTR_1G101830	AT5G51890	AT5G51890	Peroxidase superfamily protein [Source:NCBI gene (formerly Entrezgene);Acc:835264]
MTR_8G078760	AT5G66600	AT5G66600	electron transporter, putative (Protein of unknown function, DUF547) [Source:NCBI gene (formerly Entrezgene);Acc:836792]
MTR_8G088110	COR314-TM2	AT1G29390	cold regulated 314 thylakoid membrane 2 [Source:NCBI gene (formerly Entrezgene);Acc:839814]
MTR_5G070360	XYP2	AT2G13820	Bifunctional inhibitor/lipid-transfer protein/seed storage 2S albumin superfamily protein [Source:NCBI gene (formerly Entrezgene);Acc:815865]
MTR_2G027560	AT4G17180	AT4G17180	O-Glycosyl hydrolases family 17 protein [Source:NCBI gene (formerly Entrezgene);Acc:827429]
MTR_4G065870	FBH3	AT1G51140	basic helix-loop-helix (bHLH) DNA-binding superfamily protein [Source:NCBI gene (formerly Entrezgene);Acc:841537]
MTR_1G098250	AT4G09830	AT4G09830	nuclear receptor family 2 group C protein [Source:NCBI gene (formerly Entrezgene);Acc:826572]
MTR_0066S0050	HHP3	AT2G24150	heptahelical protein 3 [Source:NCBI gene (formerly Entrezgene);Acc:816949]
MTR_4G127700	AT2G18969	AT2G18969	transcription factor/transcription regulator [Source:NCBI gene (formerly Entrezgene);Acc:6240648]
MTR_3G104460	EMB3135	AT5G11890	harpin-induced protein [Source:NCBI gene (formerly Entrezgene);Acc:831062]
MTR_2G104120	AT3G09670	AT3G09670	Tudor/PWWP/MBT superfamily protein [Source:NCBI gene (formerly Entrezgene);Acc:820124]
MTR_3G085460	AT3G43400	AT3G43400	ELMO/CED-12 family protein [Source:NCBI gene (formerly Entrezgene);Acc:823420]
MTR_2G435340	AT3G16850	AT3G16850	Pectin lyase-like superfamily protein [Source:NCBI gene (formerly Entrezgene);Acc:820938]
MTR_2G039160	PAO5	AT4G29720	polyamine oxidase 5 [Source:NCBI gene (formerly Entrezgene);Acc:829093]
MTR_3G102770	VEP1	AT4G24220	NAD(P)-binding Rossmann-fold superfamily protein [Source:NCBI gene (formerly Entrezgene);Acc:828523]
MTR_8G106580	AT1G45688	AT1G45688	transmembrane protein [Source:NCBI gene (formerly Entrezgene);Acc:841102]
MTR_1G090657	AT3G10440	AT3G10440	Shugoshin C terminus [Source:NCBI gene (formerly Entrezgene);Acc:820208]
MTR_8G090130	AT5G04160	AT5G04160	Nucleotide-sugar transporter family protein [Source:NCBI gene (formerly Entrezgene);Acc:830294]
MTR_3G087510	PLAT2	AT2G22170	Lipase/lipooxygenase, PLAT/LH2 family protein [Source:NCBI gene (formerly Entrezgene);Acc:816751]
MTR_8G447000	AT3G12710	AT3G12710	DNA glycosylase superfamily protein [Source:NCBI gene (formerly Entrezgene);Acc:820453]
MTR_4G132110	PRXR1	AT4G21960	Peroxidase superfamily protein [Source:NCBI gene (formerly Entrezgene);Acc:828285]
MTR_1G087270	AT4G02100	AT4G02100	Heat shock protein DnaJ with tetratricopeptide repeat-containing protein [Source:NCBI gene (formerly Entrezgene);Acc:828142]
MTR_4G111770	AT1G48990	AT1G48990	Oleosin family protein [Source:NCBI gene (formerly Entrezgene);Acc:841321]
MTR_8G022440	AT1G72430	AT1G72430	SAUR-like auxin-responsive protein family [Source:NCBI gene (formerly Entrezgene);Acc:843575]
MTR_8G099880	AT5G50915	AT5G50915	basic helix-loop-helix (bHLH) DNA-binding superfamily protein [Source:NCBI gene (formerly Entrezgene);Acc:835164]
MTR_1G087710	AT5G38700	AT5G38700	cotton fiber protein [Source:NCBI gene (formerly Entrezgene);Acc:833860]
MTR_7G118340	PPa1	AT1G01050	pyrophosphorylase 1 [Source:NCBI gene (formerly Entrezgene);Acc:839579]
MTR_7G078730	AT1G01540	AT1G01540	Protein kinase superfamily protein [Source:NCBI gene (formerly Entrezgene);Acc:839533]
MTR_1G094930	BME3	AT3G54810	Plant-specific GATA-type zinc finger transcription factor family protein [Source:NCBI gene (formerly Entrezgene);Acc:824646]
MTR_5G022310	AT2G17860	AT2G17860	Pathosis-related thaumatin superfamily protein [Source:NCBI gene (formerly Entrezgene);Acc:816296]
MTR_7G117415	AT3G61790	AT3G61790	Protein with RING/U-box and TRAF-like domain [Source:NCBI gene (formerly Entrezgene);Acc:825352]
MTR_4G107620	AT5G62710	AT5G62710	Leucine-rich repeat protein kinase family protein [Source:NCBI gene (formerly Entrezgene);Acc:836392]
MTR_5G018270	sks17	AT5G66920	SKU5 similar 17 [Source:NCBI gene (formerly Entrezgene);Acc:836826]
MTR_8G076820	AT2G18140	AT2G18140	Peroxidase superfamily protein [Source:NCBI gene (formerly Entrezgene);Acc:816327]
MTR_2G046740	AT1G30600	AT1G30600	Subtilase family protein [Source:NCBI gene (formerly Entrezgene);Acc:839940]
MTR_8G072210	AT4G19380	AT4G19380	Long-chain fatty alcohol dehydrogenase family protein [Source:NCBI gene (formerly Entrezgene);Acc:827679]
MTR_3G107730	AT4G32510	AT4G32510	HCO3- transporter family [Source:NCBI gene (formerly Entrezgene);Acc:829386]
MTR_8G030850	ROPGEF3	AT4G00460	RHO guanyl-nucleotide exchange factor 3 [Source:NCBI gene (formerly Entrezgene);Acc:827967]
MTR_4G074350	DWF1	AT3G19820	cell elongation protein / DWARF1 / DIMINUTO (DIM) [Source:NCBI gene (formerly Entrezgene);Acc:821519]
MTR_5G027510	AT1G32090	AT1G32090	early-responsive to dehydration stress protein (ERD4) [Source:NCBI gene (formerly Entrezgene);Acc:840101]
MTR_5G009130	AT1G64450	AT1G64450	Glycine-rich protein family [Source:NCBI gene (formerly Entrezgene);Acc:842753]
MTR_1G077890	MGL	AT1G64660	methionine gamma-lyase [Source:NCBI gene (formerly Entrezgene);Acc:842774]
MTR_6G086260	GNL2	AT5G19610	GNOM-like 2 [Source:NCBI gene (formerly Entrezgene);Acc:832081]
MTR_3G098270	AT5G08460	AT5G08460	GDSL-like Lipase/Acylhydrolase superfamily protein [Source:NCBI gene (formerly Entrezgene);Acc:830745]
MTR_4G069970	AT4G34500	AT4G34500	Protein kinase superfamily protein [Source:NCBI gene (formerly Entrezgene);Acc:829601]
MTR_7G114860	AT5G28300	AT5G28300	Duplicated homeodomain-like superfamily protein [Source:NCBI gene (formerly Entrezgene);Acc:832914]
MTR_8G042710	AT5G67090	AT5G67090	Subtilisin-like serine endopeptidase family protein [Source:NCBI gene (formerly Entrezgene);Acc:836844]
MTR_3G084150	SAUR24	AT5G18080	SAUR-like auxin-responsive protein family [Source:NCBI gene (formerly Entrezgene);Acc:28721172]
MTR_7G109280	AT1G02700	AT1G02700	GATA transcription factor-like protein [Source:NCBI gene (formerly Entrezgene);Acc:839492]
MTR_5G006530	SOL1	AT3G22760	Tesmin/TSO1-like CXC domain-containing protein [Source:NCBI gene (formerly Entrezgene);Acc:821847]
MTR_7G016600	44806	AT3G02310	K-box region and MADS-box transcription factor family protein [Source:NCBI gene (formerly Entrezgene);Acc:821151]
MTR_8G071920	NFD4	AT1G31470	Major facilitator superfamily protein [Source:NCBI gene (formerly Entrezgene);Acc:840037]
MTR_3G085180	SPL11	AT1G27360	squamosa promoter-like 11 [Source:NCBI gene (formerly Entrezgene);Acc:839625]
MTR_5G069740	AT3G47050	AT3G47050	Glycosyl hydrolase family protein [Source:NCBI gene (formerly Entrezgene);Acc:823858]
MTR_2G088770	RCI3	AT1G05260	Peroxidase superfamily protein [Source:NCBI gene (formerly Entrezgene);Acc:837028]
MTR_1G069805	NAC074	AT4G28530	NAC domain containing protein 74 [Source:NCBI gene (formerly Entrezgene);Acc:828971]
MTR_4G028060	cycp3;1	AT2G45080	cyclin p3;1 [Source:NCBI gene (formerly Entrezgene);Acc:819115]
MTR_5G080710	AT3G50710	AT3G50710	F-box/RNI-like/FBD-like domains-containing protein [Source:NCBI gene (formerly Entrezgene);Acc:824235]
MTR_4G128260	AT4G25835	AT4G25835	P-loop containing nucleoside triphosphate hydrolases superfamily protein [Source:NCBI gene (formerly Entrezgene);Acc:828689]
MTR_8G099420	LACS4	AT4G23850	AMP-dependent synthetase and ligase family protein [Source:NCBI gene (formerly Entrezgene);Acc:828484]
MTR_5G005420	AT1G50040	AT1G50040	formin-like protein, putative (DUF1005) [Source:NCBI gene (formerly Entrezgene);Acc:841428]
MTR_1G057460	AT3G16180	AT3G16180	Major facilitator superfamily protein [Source:NCBI gene (formerly Entrezgene);Acc:820864]
MTR_6G086020	AT3G24450	AT3G24450	Heavy metal transport/detoxification superfamily protein [Source:NCBI gene (formerly Entrezgene);Acc:822035]
MTR_4G081950	EXPA1	AT1G69530	expansin A1 [Source:NCBI gene (formerly Entrezgene);Acc:843288]
MTR_4G126330	BGAL4	AT5G56870	beta-galactosidase 4 [Source:NCBI gene (formerly Entrezgene);Acc:835789]
MTR_4G058730	CNGC15	AT2G28260	cyclic nucleotide-gated channel 15 [Source:NCBI gene (formerly Entrezgene);Acc:817372]
MTR_3G077630	AT5G62960	AT5G62960	UDP-N-acetylglucosamine-N-acetylmuramyl-pyrophosphoryl-undecaprenol N-acetylglucosamine protein [Source:NCBI gene (formerly Entrezgene);Acc:836416]
MTR_4G095075	NRAMP3	AT2G23150	natural resistance-associated macrophage protein 3 [Source:NCBI gene (formerly Entrezgene);Acc:816847]
MTR_4G010130	EGY3	AT1G17870	ethylene-dependent gravitropism-deficient and yellow-green-like 3 [Source:NCBI gene (formerly Entrezgene);Acc:838366]
MTR_8G064180	XTH33	AT1G10550	xyloglucan:xyloglucosyl transferase 33 [Source:NCBI gene (formerly Entrezgene);Acc:837596]
MTR_7G010800	FTSH6	AT5G15250	FTSH protease 6 [Source:NCBI gene (formerly Entrezgene);Acc:831377]
MTR_2G014050	AT4G21020	AT4G21020	Late embryosis abundant protein (LEA) family protein [Source:NCBI gene (formerly Entrezgene);Acc:827849]
MTR_8G009560	AT1G02190	AT1G02190	Fatty acid hydroxylase superfamily [Source:NCBI gene (formerly Entrezgene);Acc:839541]
MTR_1G106790	AT2G14690	AT2G14690	Glycosyl hydrolase superfamily protein [Source:NCBI gene (formerly Entrezgene);Acc:815957]
MTR_7G072410	AT3G23270	AT3G23270	Regulator of chromosome condensation (RCC1) family with FYVE zinc finger domain-containing protein [Source:NCBI gene (formerly Entrezgene);Acc:821906]
MTR_6G034030	SLAH3	AT5G24030	SLAC1 homologue 3 [Source:NCBI gene (formerly Entrezgene);Acc:832468]
MTR_5G010150	PIP1C	AT1G01620	plasma membrane intrinsic protein 1C [Source:NCBI gene (formerly Entrezgene);Acc:839235]
MTR_7G012820	CLPB3	AT5G15450	casein lytic proteinase B3 [Source:NCBI gene (formerly Entrezgene);Acc:831398]
MTR_0236S0050	AT1G52190	AT1G52190	Major facilitator superfamily protein [Source:NCBI gene (formerly Entrezgene);Acc:841649]
MTR_7G104190	AT1G19490	AT1G19490	Basic-leucine zipper (bZIP) transcription factor family protein [Source:NCBI gene (formerly Entrezgene);Acc:838535]
MTR_3G086630	AT1G24580	AT1G24580	RING/U-box superfamily protein [Source:NCBI gene (formerly Entrezgene);Acc:2745762]
MTR_3G074830	EXO	AT4G08950	Phosphate-responsive 1 family protein [Source:NCBI gene (formerly Entrezgene);Acc:826473]
MTR_8G072260	CYP707A1	AT4G19230	cytochrome P450, family 707, subfamily A, polypeptide 1 [Source:NCBI gene (formerly Entrezgene);Acc:827663]
MTR_2G437660	GALS2	AT5G44670	glycosyltransferase family protein (DUF23) [Source:NCBI gene (formerly Entrezgene);Acc:834496]
MTR_3G093970	AT3G56360	AT3G56360
MTR_2G022700	GPT2	AT1G61800	glucose-6-phosphate/phosphate translocator 2 [Source:NCBI gene (formerly Entrezgene);Acc:842477]
MTR_3G077750	HCA2	AT5G62940	Dof-type zinc finger DNA-binding family protein [Source:NCBI gene (formerly Entrezgene);Acc:836414]
MTR_3G461480	AAP7	AT5G23810	amino acid permease 7 [Source:NCBI gene (formerly Entrezgene);Acc:832446]
MTR_2G103650	AT3G15720	AT3G15720	Pectin lyase-like superfamily protein [Source:NCBI gene (formerly Entrezgene);Acc:820815]
MTR_5G019680	HB21	AT2G18550	homeobox protein 21 [Source:NCBI gene (formerly Entrezgene);Acc:816370]
MTR_1G067560	NAKR3	AT3G53530	Chloroplast-targeted copper chaperone protein [Source:NCBI gene (formerly Entrezgene);Acc:824521]
MTR_8G089805	AT3G26430	AT3G26430	GDSL-like Lipase/Acylhydrolase superfamily protein [Source:NCBI gene (formerly Entrezgene);Acc:822247]
MTR_7G108650	TSPO	AT2G47770	TSPO(outer membrane tryptophan-rich sensory protein)-like protein [Source:NCBI gene (formerly Entrezgene);Acc:819389]
MTR_3G110205	TINY2	AT5G11590	Integrase-type DNA-binding superfamily protein [Source:NCBI gene (formerly Entrezgene);Acc:831031]
MTR_6G034055	MAKR6	AT5G52900	membrane-associated kinase regulator [Source:NCBI gene (formerly Entrezgene);Acc:835367]
MTR_1G018200	BGAL12	AT4G26140	beta-galactosidase 12 [Source:NCBI gene (formerly Entrezgene);Acc:828720]
MTR_4G095280	AGP17	AT2G23130	arabinogalactan protein 17 [Source:NCBI gene (formerly Entrezgene);Acc:816845]
MTR_2G094060	BGAL8	AT2G28470	beta-galactosidase 8 [Source:NCBI gene (formerly Entrezgene);Acc:817395]
MTR_1G083770	ATK4	AT5G27000	kinesin 4 [Source:NCBI gene (formerly Entrezgene);Acc:832758]
MTR_2G094410	AT2G28400	AT2G28400	senescence regulator (Protein of unknown function, DUF584) [Source:NCBI gene (formerly Entrezgene);Acc:817388]
MTR_1G018640	AT1G10588	AT1G10588	Gibberellin-regulated family protein [Source:NCBI gene (formerly Entrezgene);Acc:5007675]
MTR_3G116240	PMT1	AT2G16120	polyol/monosaccharide transporter 1 [Source:NCBI gene (formerly Entrezgene);Acc:816109]
MTR_2G103140	AT3G15650	AT3G15650	alpha/beta-Hydrolases superfamily protein [Source:NCBI gene (formerly Entrezgene);Acc:820808]
MTR_8G044070	WRI1	AT3G54320	Integrase-type DNA-binding superfamily protein [Source:NCBI gene (formerly Entrezgene);Acc:824599]
MTR_5G020060	AT5G66780	AT5G66780	late embryosis abundant protein [Source:NCBI gene (formerly Entrezgene);Acc:836811]
MTR_4G103840	AT3G48510	AT3G48510	AtIII18x5-like protein [Source:NCBI gene (formerly Entrezgene);Acc:824010]
MTR_5G045370	AFP2	AT1G13740	ABI five binding protein 2 [Source:NCBI gene (formerly Entrezgene);Acc:837934]
MTR_3G115050	sks8	AT1G21850	SKU5 similar 8 [Source:NCBI gene (formerly Entrezgene);Acc:838787]
MTR_3G088845	AT1G21400	AT1G21400	Thiamin diphosphate-binding fold (THDP-binding) superfamily protein [Source:NCBI gene (formerly Entrezgene);Acc:838739]
MTR_4G120050	AT5G49100	AT5G49100	vitellogenin-like protein [Source:NCBI gene (formerly Entrezgene);Acc:834969]
MTR_3G106290	ESE3	AT5G25190	Integrase-type DNA-binding superfamily protein [Source:NCBI gene (formerly Entrezgene);Acc:832590]
MTR_8G070040	AT2G37870	AT2G37870	Bifunctional inhibitor/lipid-transfer protein/seed storage 2S albumin superfamily protein [Source:NCBI gene (formerly Entrezgene);Acc:818363]
MTR_7G116870	AT4G01130	AT4G01130	GDSL-like Lipase/Acylhydrolase superfamily protein [Source:NCBI gene (formerly Entrezgene);Acc:828207]
MTR_1G077790	ENODL8	AT1G64640	early nodulin-like protein 8 [Source:NCBI gene (formerly Entrezgene);Acc:842772]
MTR_4G037690	AT2G41190	AT2G41190	Transmembrane amino acid transporter family protein [Source:NCBI gene (formerly Entrezgene);Acc:818718]
MTR_5G016010	AT3G49960	AT3G49960	Peroxidase superfamily protein [Source:NCBI gene (formerly Entrezgene);Acc:824158]
MTR_1G100627	LTI65	AT5G52300	CAP160 protein [Source:NCBI gene (formerly Entrezgene);Acc:835306]
MTR_2G101370	AT1G52180	AT1G52180	Aquaporin-like superfamily protein [Source:NCBI gene (formerly Entrezgene);Acc:841648]
MTR_1G099400	AT5G24080	AT5G24080	Protein kinase superfamily protein [Source:NCBI gene (formerly Entrezgene);Acc:832473]
MTR_7G084770	XTH5	AT5G13870	xyloglucan endotransglucosylase/hydrolase 5 [Source:NCBI gene (formerly Entrezgene);Acc:831233]
MTR_4G020110	P5CS1	AT2G39800	delta1-pyrroline-5-carboxylate synthase 1 [Source:NCBI gene (formerly Entrezgene);Acc:818566]
MTR_8G096020	AT5G07330	AT5G07330	NFU1 iron-sulfur cluster protein [Source:NCBI gene (formerly Entrezgene);Acc:830624]
MTR_4G106860	AT5G14920	AT5G14920	Gibberellin-regulated family protein [Source:NCBI gene (formerly Entrezgene);Acc:831344]
MTR_8G081600	AT4G13840	AT4G13840	HXXXD-type acyl-transferase family protein [Source:NCBI gene (formerly Entrezgene);Acc:827018]
MTR_8G081480	AT3G23840	AT3G23840	HXXXD-type acyl-transferase family protein [Source:NCBI gene (formerly Entrezgene);Acc:821967]
MTR_1G096530	UPB1	AT2G47270	transcription factor UPBEAT protein [Source:NCBI gene (formerly Entrezgene);Acc:819340]
