# Supplementary material for: Elucidation of Physiological, Transcriptomic and Metabolomic Salinity Response Mechanisms in Medicago sativa
Source: Plants (Basel). 2023 May 22;12(10):2059. doi: 10.3390/plants12102059 (PMC10221938; doi:10.3390/plants12102059)
Supplement: Supplementary file 1 [file plants-12-02059-s001.zip › plants-2403550-supplementary/Supplemental File 2 Mapman bins for DEGs (Mar 20 2023).xlsx]

## Sheet: Sheet1
BinCode	BinName	id	type	description	log2FC
Abiotic stress-related cell functions
20.2	stress.abiotic	medtr4g114550.1	Transcript	(at2g26660 : 270.0) SPX domain gene 2 (SPX2); CONTAINS InterPro DOMAIN/s: SPX, N-terminal (InterPro:IPR004331); BEST Arabidopsis thaliana protein match is: SPX domain gene 1 (TAIR:AT5G20150.1); Has 1206 Blast hits to 1202 proteins in 209 species: Archae - 0; Bacteria - 6; Metazoa - 245; Fungi - 512; Plants - 320; Viruses - 0; Other Eukaryotes - 123 (source: NCBI BLink). & (gnl|cdd|36376 : 215.0) …	-1.61555
20.2	stress.abiotic	medtr7g108650.1	Transcript	(at2g47770 : 120.0) Encodes a membrane-bound protein designated AtTSPO (Arabidopsis thaliana TSPO-related). AtTSPO is related to the bacterial outer membrane tryptophan-rich sensory protein (TspO) and the mammalian mitochondrial 18 kDa Translocator Protein (18 kDa TSPO), members of the TspO/MBR domain-containing membrane proteins. Mainly detected in dry seeds, but can be induced in vegetative tis…	3.65793
20.2	stress.abiotic	medtr8g096900.1	Transcript	(p25096|p21_soybn : 307.0) Protein P21 - Glycine max (Soybean) & (gnl|cdd|84687 : 291.0) no description available & (at4g11650 : 282.0) osmotin-like protein; osmotin 34 (OSM34); INVOLVED IN: defense response to fungus, incompatible interaction, response to salt stress, defense response to bacterium, incompatible interaction, response to other organism; LOCATED IN: endomembrane system; EXPRESSED I…	-1.36582
20.2.1	stress.abiotic.heat	medtr1g038430.1	Transcript	(at5g23240 : 401.0) DNAJ heat shock N-terminal domain-containing protein; FUNCTIONS IN: unfolded protein binding, heat shock protein binding; INVOLVED IN: protein folding; LOCATED IN: chloroplast; EXPRESSED IN: 21 plant structures; EXPRESSED DURING: 11 growth stages; CONTAINS InterPro DOMAIN/s: Molecular chaperone, heat shock protein, Hsp40, DnaJ (InterPro:IPR015609), Heat shock protein DnaJ, N-t…	-2.05028
20.2.1	stress.abiotic.heat	medtr1g087270.1	Transcript	(at4g02100 : 625.0) Heat shock protein DnaJ with tetratricopeptide repeat; FUNCTIONS IN: binding, heat shock protein binding; INVOLVED IN: protein folding; LOCATED IN: cellular_component unknown; EXPRESSED IN: leaf; CONTAINS InterPro DOMAIN/s: Tetratricopeptide-like helical (InterPro:IPR011990), Heat shock protein DnaJ, N-terminal (InterPro:IPR001623); BEST Arabidopsis thaliana protein match is: …	2.28196
20.2.1	stress.abiotic.heat	medtr4g063710.1	Transcript	(p09189|hsp7c_pethy : 1087.0) Heat shock cognate 70 kDa protein - Petunia hybrida (Petunia) & (at3g12580 : 1084.0) heat shock protein 70 (HSP70); FUNCTIONS IN: ATP binding; INVOLVED IN: in 9 processes; LOCATED IN: cytosol, mitochondrion, cell wall, plasma membrane; EXPRESSED IN: 23 plant structures; EXPRESSED DURING: 11 growth stages; CONTAINS InterPro DOMAIN/s: Heat shock protein 70, conserved s…	1.24803
20.2.1	stress.abiotic.heat	medtr4g063720.1	Transcript	(p09189|hsp7c_pethy : 1079.0) Heat shock cognate 70 kDa protein - Petunia hybrida (Petunia) & (at3g12580 : 1077.0) heat shock protein 70 (HSP70); FUNCTIONS IN: ATP binding; INVOLVED IN: in 9 processes; LOCATED IN: cytosol, mitochondrion, cell wall, plasma membrane; EXPRESSED IN: 23 plant structures; EXPRESSED DURING: 11 growth stages; CONTAINS InterPro DOMAIN/s: Heat shock protein 70, conserved s…	1.22499
20.2.1	stress.abiotic.heat	medtr6g033820.1	Transcript	(p09189|hsp7c_pethy : 758.0) Heat shock cognate 70 kDa protein - Petunia hybrida (Petunia) & (at3g12580 : 750.0) heat shock protein 70 (HSP70); FUNCTIONS IN: ATP binding; INVOLVED IN: in 9 processes; LOCATED IN: cytosol, mitochondrion, cell wall, plasma membrane; EXPRESSED IN: 23 plant structures; EXPRESSED DURING: 11 growth stages; CONTAINS InterPro DOMAIN/s: Heat shock protein 70, conserved sit…	-2.61473
20.2.1	stress.abiotic.heat	medtr6g033870.1	Transcript	(p09189|hsp7c_pethy : 755.0) Heat shock cognate 70 kDa protein - Petunia hybrida (Petunia) & (at3g12580 : 745.0) heat shock protein 70 (HSP70); FUNCTIONS IN: ATP binding; INVOLVED IN: in 9 processes; LOCATED IN: cytosol, mitochondrion, cell wall, plasma membrane; EXPRESSED IN: 23 plant structures; EXPRESSED DURING: 11 growth stages; CONTAINS InterPro DOMAIN/s: Heat shock protein 70, conserved sit…	-2.50653
20.2.1	stress.abiotic.heat	medtr6g033955.1	Transcript	(p09189|hsp7c_pethy : 764.0) Heat shock cognate 70 kDa protein - Petunia hybrida (Petunia) & (at3g12580 : 755.0) heat shock protein 70 (HSP70); FUNCTIONS IN: ATP binding; INVOLVED IN: in 9 processes; LOCATED IN: cytosol, mitochondrion, cell wall, plasma membrane; EXPRESSED IN: 23 plant structures; EXPRESSED DURING: 11 growth stages; CONTAINS InterPro DOMAIN/s: Heat shock protein 70, conserved sit…	-2.68375
20.2.1	stress.abiotic.heat	medtr6g452990.1	Transcript	(at5g52640 : 1089.0) Encodes a cytosolic heat shock protein AtHSP90.1. AtHSP90.1 interacts with disease resistance signaling components SGT1b and RAR1 and is required for RPS2-mediated resistance.; heat shock protein 90.1 (HSP90.1); FUNCTIONS IN: unfolded protein binding, ATP binding; INVOLVED IN: defense response to bacterium, response to heat, response to arsenic; LOCATED IN: cytosol, cell wall…	1.39294
20.2.1	stress.abiotic.heat	medtr7g012820.1	Transcript	(at5g15450 : 1501.0) Encodes a chloroplast-targeted Hsp101 homologue. Functions as a molecular chaperone involved in plastid differentiation mediating internal thylakoid membrane formation and conferring thermotolerance to chloroplasts during heat stress. APG6 is constitutively expressed in the root tips, the organ boundary region, the reproductive tissues of mature plants where plastids exist as…	3.21406
20.2.1	stress.abiotic.heat	medtr0027s0230.1	Transcript	(p05478|hsp16_soybn : 119.0) 18.5 kDa class I heat shock protein (HSP 18.5) - Glycine max (Soybean) & (at2g29500 : 109.0) HSP20-like chaperones superfamily protein; CONTAINS InterPro DOMAIN/s: Heat shock protein Hsp20 (InterPro:IPR002068), HSP20-like chaperone (InterPro:IPR008978); BEST Arabidopsis thaliana protein match is: HSP20-like chaperones superfamily protein (TAIR:AT1G07400.1); Has 6873 B…	-1.41904
20.2.1	stress.abiotic.heat	medtr1207s0010.1	Transcript	(at5g02490 : 251.0) Heat shock protein 70 (Hsp 70) family protein; FUNCTIONS IN: protein binding; INVOLVED IN: protein folding, response to cadmium ion, response to heat, response to bacterium; LOCATED IN: cytosol, cell wall, plasma membrane; EXPRESSED IN: 19 plant structures; EXPRESSED DURING: 10 growth stages; CONTAINS InterPro DOMAIN/s: Heat shock protein 70, conserved site (InterPro:IPR018181…	-2.52766
20.2.2	stress.abiotic.cold	medtr2g088770.1	Transcript	(at4g11290 : 452.0) Peroxidase superfamily protein; FUNCTIONS IN: peroxidase activity, heme binding; INVOLVED IN: response to oxidative stress, oxidation reduction; LOCATED IN: endomembrane system; EXPRESSED IN: 11 plant structures; EXPRESSED DURING: 7 growth stages; CONTAINS InterPro DOMAIN/s: Haem peroxidase (InterPro:IPR010255), Plant peroxidase (InterPro:IPR000823), Peroxidases heam-ligand bi…	2.81882
20.2.2	stress.abiotic.cold	medtr4g019800.1	Transcript	(at3g53990 : 245.0) Adenine nucleotide alpha hydrolases-like superfamily protein; FUNCTIONS IN: molecular_function unknown; INVOLVED IN: response to cold, response to stress; LOCATED IN: cellular_component unknown; EXPRESSED IN: 23 plant structures; EXPRESSED DURING: 14 growth stages; CONTAINS InterPro DOMAIN/s: UspA (InterPro:IPR006016), Rossmann-like alpha/beta/alpha sandwich fold (InterPro:IPR…	1.22819
20.2.2	stress.abiotic.cold	medtr6g045643.1	Transcript	(at5g23950 : 154.0) Calcium-dependent lipid-binding (CaLB domain) family protein; CONTAINS InterPro DOMAIN/s: C2 calcium/lipid-binding domain, CaLB (InterPro:IPR008973), C2 calcium-dependent membrane targeting (InterPro:IPR000008); BEST Arabidopsis thaliana protein match is: Calcium-dependent lipid-binding (CaLB domain) family protein (TAIR:AT1G07310.1); Has 7173 Blast hits to 1801 proteins in 19…	-2.02006
20.2.3	stress.abiotic.drought/salt	medtr1g442840.1	Transcript	(at1g04430 : 959.0) S-adenosyl-L-methionine-dependent methyltransferases superfamily protein; INVOLVED IN: biological_process unknown; LOCATED IN: Golgi apparatus, plasma membrane; EXPRESSED IN: 26 plant structures; EXPRESSED DURING: 15 growth stages; CONTAINS InterPro DOMAIN/s: Protein of unknown function DUF248, methyltransferase putative (InterPro:IPR004159); BEST Arabidopsis thaliana protein …	1.34216
20.2.3	stress.abiotic.drought/salt	medtr1g075900.1	Transcript	(at1g04430 : 1002.0) S-adenosyl-L-methionine-dependent methyltransferases superfamily protein; INVOLVED IN: biological_process unknown; LOCATED IN: Golgi apparatus, plasma membrane; EXPRESSED IN: 26 plant structures; EXPRESSED DURING: 15 growth stages; CONTAINS InterPro DOMAIN/s: Protein of unknown function DUF248, methyltransferase putative (InterPro:IPR004159); BEST Arabidopsis thaliana protein…	0.974438
20.2.3	stress.abiotic.drought/salt	medtr1g107555.1	Transcript	(at1g71040 : 799.0) Encodes LPR2. Function together with LPR1 (AT1G23010) and a P5-type ATPase (At5g23630/PDR2) in a common pathway that adjusts root meristem activity to Pi (inorganic phosphate) availability.; Low Phosphate Root2 (LPR2); FUNCTIONS IN: oxidoreductase activity, copper ion binding; INVOLVED IN: cellular response to phosphate starvation, meristem maintenance; LOCATED IN: cell wall, …	-1.07503
20.2.3	stress.abiotic.drought/salt	medtr2g018780.1	Transcript	(at1g30360 : 896.0) early-responsive to dehydration 4 (ERD4); INVOLVED IN: response to water deprivation; LOCATED IN: plasma membrane, chloroplast, vacuole, membrane, chloroplast envelope; EXPRESSED IN: 26 plant structures; EXPRESSED DURING: 14 growth stages; CONTAINS InterPro DOMAIN/s: Protein of unknown function DUF221 (InterPro:IPR003864); BEST Arabidopsis thaliana protein match is: ERD (early…	1.87632
20.2.3	stress.abiotic.drought/salt	medtr3g088790.1	Transcript	(at5g64030 : 897.0) S-adenosyl-L-methionine-dependent methyltransferases superfamily protein; CONTAINS InterPro DOMAIN/s: Protein of unknown function DUF248, methyltransferase putative (InterPro:IPR004159); BEST Arabidopsis thaliana protein match is: S-adenosyl-L-methionine-dependent methyltransferases superfamily protein (TAIR:AT1G29470.2); Has 79879 Blast hits to 39720 proteins in 2025 species:…	1.61924
20.2.3	stress.abiotic.drought/salt	medtr5g027510.1	Transcript	(at1g32090 : 1038.0) early-responsive to dehydration stress protein (ERD4); FUNCTIONS IN: molecular_function unknown; INVOLVED IN: biological_process unknown; LOCATED IN: plasma membrane; EXPRESSED IN: 23 plant structures; EXPRESSED DURING: 13 growth stages; CONTAINS InterPro DOMAIN/s: Protein of unknown function DUF221 (InterPro:IPR003864); BEST Arabidopsis thaliana protein match is: ERD (early-…	2.52909
20.2.3	stress.abiotic.drought/salt	medtr5g080720.1	Transcript	(at2g39750 : 1001.0) S-adenosyl-L-methionine-dependent methyltransferases superfamily protein; CONTAINS InterPro DOMAIN/s: Protein of unknown function DUF248, methyltransferase putative (InterPro:IPR004159); BEST Arabidopsis thaliana protein match is: Putative methyltransferase family protein (TAIR:AT5G06050.1); Has 1633 Blast hits to 1528 proteins in 174 species: Archae - 2; Bacteria - 140; Meta…	1.60159
20.2.3	stress.abiotic.drought/salt	medtr5g083150.1	Transcript	(at2g40280 : 776.0) S-adenosyl-L-methionine-dependent methyltransferases superfamily protein; CONTAINS InterPro DOMAIN/s: Protein of unknown function DUF248, methyltransferase putative (InterPro:IPR004159); BEST Arabidopsis thaliana protein match is: S-adenosyl-L-methionine-dependent methyltransferases superfamily protein (TAIR:AT3G56080.1); Has 1258 Blast hits to 1230 proteins in 178 species: Ar…	0.900736
20.2.3	stress.abiotic.drought/salt	medtr7g100430.1	Transcript	(at3g09550 : 729.0) Ankyrin repeat family protein; CONTAINS InterPro DOMAIN/s: Ankyrin repeat-containing domain (InterPro:IPR020683), Ankyrin repeat (InterPro:IPR002110); BEST Arabidopsis thaliana protein match is: Ankyrin repeat family protein (TAIR:AT3G12360.1); Has 55803 Blast hits to 24932 proteins in 1099 species: Archae - 58; Bacteria - 5470; Metazoa - 27318; Fungi - 5824; Plants - 4263; Vi…	1.45502
20.2.3	stress.abiotic.drought/salt	medtr8g071280.1	Transcript	(at4g19120 : 936.0) early-responsive to dehydration 3 (ERD3); CONTAINS InterPro DOMAIN/s: Protein of unknown function DUF248, methyltransferase putative (InterPro:IPR004159); BEST Arabidopsis thaliana protein match is: S-adenosyl-L-methionine-dependent methyltransferases superfamily protein (TAIR:AT1G31850.2); Has 1146 Blast hits to 1130 proteins in 105 species: Archae - 6; Bacteria - 157; Metazo…	1.09288
20.2.4	stress.abiotic.touch/wounding	medtr3g072030.1	Transcript	(gnl|cdd|70566 : 127.0) no description available & (at3g10985 : 116.0) A senescence-associated gene whose expression is induced in response to treatment with Nep1, a fungal protein that causes necrosis.; senescence associated gene 20 (SAG20); CONTAINS InterPro DOMAIN/s: Wound-induced protein, Wun1, subgroup (InterPro:IPR016533), Wound-induced protein, Wun1 (InterPro:IPR009798); BEST Arabidopsis t…	-1.14188
20.2.4	stress.abiotic.touch/wounding	medtr3g112160.1	Transcript	(at1g75380 : 434.0) Encodes a nucleases AtBBD1 involved in ABA-mediated callose deposition.; bifunctional nuclease in basal defense response 1 (BBD1); CONTAINS InterPro DOMAIN/s: Protein of unknown function DUF151 (InterPro:IPR003729), UvrB/UvrC protein (InterPro:IPR001943); BEST Arabidopsis thaliana protein match is: Wound-responsive family protein (TAIR:AT1G19660.2); Has 843 Blast hits to 843 p…	-1.01494
20.2.99	stress.abiotic.unspecified	medtr3g073990.1	Transcript	(at4g08685 : 159.0) Encodes a protein, expressed in leaves, with similarity to pollen allergens.; SAH7; FUNCTIONS IN: molecular_function unknown; INVOLVED IN: biological_process unknown; LOCATED IN: endomembrane system; EXPRESSED IN: 22 plant structures; EXPRESSED DURING: 13 growth stages; CONTAINS InterPro DOMAIN/s: Pollen Ole e 1 allergen/extensin (InterPro:IPR006041); BEST Arabidopsis thaliana…	1.69771
20.2.99	stress.abiotic.unspecified	medtr5g083270.1	Transcript	(at2g40330 : 225.0) Encodes a member of the PYR (pyrabactin resistance )/PYL(PYR1-like)/RCAR (regulatory components of ABA receptor) family proteins with 14 members. PYR/PYL/RCAR family proteins function as abscisic acid sensors. Mediate ABA-dependent regulation of protein phosphatase 2Cs ABI1 and ABI2.; PYR1-like 6 (PYL6); CONTAINS InterPro DOMAIN/s: Polyketide cyclase/dehydrase (InterPro:IPR019…	-4.12993
20.2.99	stress.abiotic.unspecified	medtr6g015995.1	Transcript	(at5g15780 : 118.0) Pollen Ole e 1 allergen and extensin family protein; FUNCTIONS IN: molecular_function unknown; INVOLVED IN: biological_process unknown; LOCATED IN: endomembrane system; EXPRESSED IN: 14 plant structures; EXPRESSED DURING: 10 growth stages; CONTAINS InterPro DOMAIN/s: Pollen Ole e 1 allergen/extensin (InterPro:IPR006041); Has 85252 Blast hits to 38354 proteins in 1825 species: …	2.67929
Phytohormones
17.4.1	hormone metabolism.cytokinin.synthesis-degradation	medtr1g072540.1	Transcript	(at3g63110 : 306.0) Encodes cytokinin synthase involved in cytokinin biosynthesis. IPT3 subcellular localization is modulated by farnesylation- when farnesylated it is localized to the nucleus, otherwise to the chloroplast.; isopentenyltransferase 3 (IPT3); CONTAINS InterPro DOMAIN/s: tRNA isopentenyltransferase (InterPro:IPR002627); BEST Arabidopsis thaliana protein match is: isopentenyltransfer…	-3.60726
17.4.1	hormone metabolism.cytokinin.synthesis-degradation	medtr6g013960.1	Transcript	(at1g22360 : 476.0) UDP-glucosyl transferase 85A2 (UGT85A2); FUNCTIONS IN: UDP-glycosyltransferase activity, transferase activity, transferring glycosyl groups, glucuronosyltransferase activity; INVOLVED IN: metabolic process; LOCATED IN: cellular_component unknown; EXPRESSED IN: 21 plant structures; EXPRESSED DURING: 11 growth stages; CONTAINS InterPro DOMAIN/s: UDP-glucuronosyl/UDP-glucosyltran…	-1.04435
17.4.1	hormone metabolism.cytokinin.synthesis-degradation	medtr6g014170.1	Transcript	(at1g22360 : 541.0) UDP-glucosyl transferase 85A2 (UGT85A2); FUNCTIONS IN: UDP-glycosyltransferase activity, transferase activity, transferring glycosyl groups, glucuronosyltransferase activity; INVOLVED IN: metabolic process; LOCATED IN: cellular_component unknown; EXPRESSED IN: 21 plant structures; EXPRESSED DURING: 11 growth stages; CONTAINS InterPro DOMAIN/s: UDP-glucuronosyl/UDP-glucosyltran…	-1.48043
17.4.1	hormone metabolism.cytokinin.synthesis-degradation	medtr6g014270.1	Transcript	(at1g22340 : 548.0) UDP-glucosyl transferase 85A7 (UGT85A7); FUNCTIONS IN: UDP-glycosyltransferase activity, transferase activity, transferring glycosyl groups, glucuronosyltransferase activity; INVOLVED IN: metabolic process; LOCATED IN: cellular_component unknown; EXPRESSED IN: 8 plant structures; CONTAINS InterPro DOMAIN/s: UDP-glucuronosyl/UDP-glucosyltransferase (InterPro:IPR002213); BEST Ar…	-2.44771
17.4.1	hormone metabolism.cytokinin.synthesis-degradation	medtr7g102450.1	Transcript	(at2g36750 : 486.0) UDP-glucosyl transferase 73C1 (UGT73C1); CONTAINS InterPro DOMAIN/s: UDP-glucuronosyl/UDP-glucosyltransferase (InterPro:IPR002213); BEST Arabidopsis thaliana protein match is: don-glucosyltransferase 1 (TAIR:AT2G36800.1); Has 7705 Blast hits to 7611 proteins in 415 species: Archae - 0; Bacteria - 205; Metazoa - 2197; Fungi - 31; Plants - 5129; Viruses - 79; Other Eukaryotes - …	-2.1959
17.4.1	hormone metabolism.cytokinin.synthesis-degradation	medtr7g102490.1	Transcript	(at2g36800 : 552.0) Encodes a DON-Glucosyltransferase. The UGT73C5 glucosylates both brassinolide and castasterone in the 23-O position. The enzyme is presumably involved in the homeostasis of those steroid hormones hence regulating BR activity. Transgenic plants overexpressing UGT73C5 show a typical BR-deficient phenotype.; don-glucosyltransferase 1 (DOGT1); CONTAINS InterPro DOMAIN/s: UDP-glucu…	-1.48236
17.4.1	hormone metabolism.cytokinin.synthesis-degradation	medtr7g102560.1	Transcript	(at2g36800 : 531.0) Encodes a DON-Glucosyltransferase. The UGT73C5 glucosylates both brassinolide and castasterone in the 23-O position. The enzyme is presumably involved in the homeostasis of those steroid hormones hence regulating BR activity. Transgenic plants overexpressing UGT73C5 show a typical BR-deficient phenotype.; don-glucosyltransferase 1 (DOGT1); CONTAINS InterPro DOMAIN/s: UDP-glucu…	-1.11194
17.6.3	hormone metabolism.gibberelin.induced-regulated-responsive-activated	medtr4g106860.1	Transcript	(at5g14920 : 83.6) Gibberellin-regulated family protein; INVOLVED IN: response to gibberellin stimulus; LOCATED IN: endomembrane system; EXPRESSED IN: 22 plant structures; EXPRESSED DURING: 13 growth stages; Has 177972 Blast hits to 67014 proteins in 2759 species: Archae - 778; Bacteria - 39574; Metazoa - 64340; Fungi - 23851; Plants - 18819; Viruses - 6445; Other Eukaryotes - 24165 (source: NCBI…	5.28725
17.7.1.2	hormone metabolism.jasmonate.synthesis-degradation.lipoxygenase	medtr1g104650.1	Transcript	(ipr013819 : 1500.0) Lipoxygenase, C-terminal & (at3g22400 : 1241.0) LOX5; FUNCTIONS IN: oxidoreductase activity, acting on single donors with incorporation of molecular oxygen, incorporation of two atoms of oxygen, lipoxygenase activity, iron ion binding, metal ion binding; INVOLVED IN: root development; LOCATED IN: chloroplast; EXPRESSED IN: 22 plant structures; EXPRESSED DURING: 13 growth stag…	-1.0395
17.7.1.2	hormone metabolism.jasmonate.synthesis-degradation.lipoxygenase	medtr3g079450.1	Transcript	(q84yk8|loxc2_orysa : 927.0) Probable lipoxygenase 8, chloroplast precursor (EC 1.13.11.12) - Oryza sativa (Rice) & (at3g45140 : 919.0) Chloroplast lipoxygenase required for wound-induced jasmonic acid accumulation in Arabidopsis.Mutants are resistant to Staphylococcus aureus and accumulate salicylic acid upon infection.; lipoxygenase 2 (LOX2); FUNCTIONS IN: lipoxygenase activity; INVOLVED IN: in…	-1.02391
17.7.1.10	hormone metabolism.jasmonate.synthesis-degradation.jasmonate-O-methyltransferase	medtr1g022465.1	Transcript	(gnl|cdd|86349 : 386.0) no description available & (at1g19640 : 332.0) Encodes a S-adenosyl-L-methionine:jasmonic acid carboxyl methyltransferase that catalyzes the formation of methyljasmonate from jasmonic acid. Its expression is induced in response to wounding or methyljasmonate treatment.; jasmonic acid carboxyl methyltransferase (JMT); CONTAINS InterPro DOMAIN/s: SAM dependent carboxyl methy…	-0.976022
17.7.1.10	hormone metabolism.jasmonate.synthesis-degradation.jasmonate-O-methyltransferase	medtr3g467270.1	Transcript	(gnl|cdd|86349 : 392.0) no description available & (at3g11480 : 292.0) The gene encodes a SABATH methyltransferase that methylates both salicylic acid and benzoic acid. It is highly expressed in flowers, induced by biotic and abiotic stress and thought to be involved in direct defense mechanism.; BSMT1; CONTAINS InterPro DOMAIN/s: SAM dependent carboxyl methyltransferase (InterPro:IPR005299); BES…	-2.40376
17.7.1.10	hormone metabolism.jasmonate.synthesis-degradation.jasmonate-O-methyltransferase	medtr3g467560.1	Transcript	(gnl|cdd|86349 : 347.0) no description available & (at5g38020 : 252.0) encodes a protein whose sequence is similar to SAM:salicylic acid carboxyl methyltransferase (SAMT) (GI:6002712)(Clarkia breweri) and to SAM:benzoic acid carboxyl methyltransferase (BAMT)(GI:9789277)(Antirrhinum majus); S-adenosyl-L-methionine-dependent methyltransferases superfamily protein; CONTAINS InterPro DOMAIN/s: SAM de…	-1.46267
17.8.1	hormone metabolism.salicylic acid.synthesis-degradation	medtr3g467270.1	Transcript	(gnl|cdd|86349 : 392.0) no description available & (at3g11480 : 292.0) The gene encodes a SABATH methyltransferase that methylates both salicylic acid and benzoic acid. It is highly expressed in flowers, induced by biotic and abiotic stress and thought to be involved in direct defense mechanism.; BSMT1; CONTAINS InterPro DOMAIN/s: SAM dependent carboxyl methyltransferase (InterPro:IPR005299); BES…	-2.40376
17.8.1	hormone metabolism.salicylic acid.synthesis-degradation	medtr3g467560.1	Transcript	(gnl|cdd|86349 : 347.0) no description available & (at5g38020 : 252.0) encodes a protein whose sequence is similar to SAM:salicylic acid carboxyl methyltransferase (SAMT) (GI:6002712)(Clarkia breweri) and to SAM:benzoic acid carboxyl methyltransferase (BAMT)(GI:9789277)(Antirrhinum majus); S-adenosyl-L-methionine-dependent methyltransferases superfamily protein; CONTAINS InterPro DOMAIN/s: SAM de…	-1.46267
17.8.1	hormone metabolism.salicylic acid.synthesis-degradation	medtr6g038200.1	Transcript	(at1g05680 : 408.0) Encodes a UDP-glucosyltransferase, UGT74E2, that acts on IBA (indole-3-butyric acid) and affects auxin homeostasis. The transcript and protein levels of this enzyme are strongly induced by H2O2 and may allow integration of ROS (reactive oxygen species) and auxin signaling. This enzyme can also transfer glycosyl groups to several compounds related to the explosive TNT when this…	-1.02476
17.8.1	hormone metabolism.salicylic acid.synthesis-degradation	medtr6g038220.1	Transcript	(at1g05680 : 404.0) Encodes a UDP-glucosyltransferase, UGT74E2, that acts on IBA (indole-3-butyric acid) and affects auxin homeostasis. The transcript and protein levels of this enzyme are strongly induced by H2O2 and may allow integration of ROS (reactive oxygen species) and auxin signaling. This enzyme can also transfer glycosyl groups to several compounds related to the explosive TNT when this…	-0.92191
17.8.1.1.4	hormone metabolism.salicylic acid.synthesis-degradation.synthesis.SA glucosyltransferase ether bond making SAG	medtr6g038200.1	Transcript	(at1g05680 : 408.0) Encodes a UDP-glucosyltransferase, UGT74E2, that acts on IBA (indole-3-butyric acid) and affects auxin homeostasis. The transcript and protein levels of this enzyme are strongly induced by H2O2 and may allow integration of ROS (reactive oxygen species) and auxin signaling. This enzyme can also transfer glycosyl groups to several compounds related to the explosive TNT when this…	-1.02476
17.8.1.1.4	hormone metabolism.salicylic acid.synthesis-degradation.synthesis.SA glucosyltransferase ether bond making SAG	medtr6g038220.1	Transcript	(at1g05680 : 404.0) Encodes a UDP-glucosyltransferase, UGT74E2, that acts on IBA (indole-3-butyric acid) and affects auxin homeostasis. The transcript and protein levels of this enzyme are strongly induced by H2O2 and may allow integration of ROS (reactive oxygen species) and auxin signaling. This enzyme can also transfer glycosyl groups to several compounds related to the explosive TNT when this…	-0.92191
17.8.1.1.5	hormone metabolism.salicylic acid.synthesis-degradation.synthesis.SA glucosyltransferase ester and ether bond making SGE, SAG	medtr6g038200.1	Transcript	(at1g05680 : 408.0) Encodes a UDP-glucosyltransferase, UGT74E2, that acts on IBA (indole-3-butyric acid) and affects auxin homeostasis. The transcript and protein levels of this enzyme are strongly induced by H2O2 and may allow integration of ROS (reactive oxygen species) and auxin signaling. This enzyme can also transfer glycosyl groups to several compounds related to the explosive TNT when this…	-1.02476
17.8.1.1.5	hormone metabolism.salicylic acid.synthesis-degradation.synthesis.SA glucosyltransferase ester and ether bond making SGE, SAG	medtr6g038220.1	Transcript	(at1g05680 : 404.0) Encodes a UDP-glucosyltransferase, UGT74E2, that acts on IBA (indole-3-butyric acid) and affects auxin homeostasis. The transcript and protein levels of this enzyme are strongly induced by H2O2 and may allow integration of ROS (reactive oxygen species) and auxin signaling. This enzyme can also transfer glycosyl groups to several compounds related to the explosive TNT when this…	-0.92191
17.8.1.1.7	hormone metabolism.salicylic acid.synthesis-degradation.synthesis.methyl-SA methylesterase	medtr3g467270.1	Transcript	(gnl|cdd|86349 : 392.0) no description available & (at3g11480 : 292.0) The gene encodes a SABATH methyltransferase that methylates both salicylic acid and benzoic acid. It is highly expressed in flowers, induced by biotic and abiotic stress and thought to be involved in direct defense mechanism.; BSMT1; CONTAINS InterPro DOMAIN/s: SAM dependent carboxyl methyltransferase (InterPro:IPR005299); BES…	-2.40376
17.8.1.1.7	hormone metabolism.salicylic acid.synthesis-degradation.synthesis.methyl-SA methylesterase	medtr3g467560.1	Transcript	(gnl|cdd|86349 : 347.0) no description available & (at5g38020 : 252.0) encodes a protein whose sequence is similar to SAM:salicylic acid carboxyl methyltransferase (SAMT) (GI:6002712)(Clarkia breweri) and to SAM:benzoic acid carboxyl methyltransferase (BAMT)(GI:9789277)(Antirrhinum majus); S-adenosyl-L-methionine-dependent methyltransferases superfamily protein; CONTAINS InterPro DOMAIN/s: SAM de…	-1.46267
17.2	hormone metabolism.auxin	medtr5g068100.1	Transcript	(at3g10870 : 361.0) Encodes a methyl IAA esterase. Methyl IAA is believed to be an inactive form of auxin that needs to be demethylated to exert a biological effect. MES17 does not act on methyl JA, MeSA, MeGA4, or MEGA9 in vitro. This gene is expressed in several tissues of seedlings and adult plants, with a higher relative level of expression in the seedling shoot apex and the adult stem.; meth…	-1.90316
17.2.1	hormone metabolism.auxin.synthesis-degradation	medtr3g084520.1	Transcript	(at4g15550 : 432.0) UDP-glucose:indole-3-acetate beta-D-glucosyltransferase; indole-3-acetate beta-D-glucosyltransferase (IAGLU); FUNCTIONS IN: UDP-glycosyltransferase activity, transferase activity, transferring glycosyl groups; INVOLVED IN: metabolic process; LOCATED IN: chloroplast; EXPRESSED IN: 17 plant structures; EXPRESSED DURING: 7 growth stages; CONTAINS InterPro DOMAIN/s: UDP-glucuronos…	-0.826911
17.2.2	hormone metabolism.auxin.signal transduction	medtr7g079720.1	Transcript	(at5g16530 : 474.0) Encodes PIN5, an atypical member of the PIN family. PIN5 is a functional auxin transporter that is required for auxin-mediated development. PIN5 does not have a direct role in cell-to-cell transport but regulates intracellular auxin homeostasis and metabolism. PIN5 localizes, unlike other characterized plasma membrane PIN proteins, to endoplasmic reticulum (ER), presumably med…	-1.49821
17.2.3	hormone metabolism.auxin.induced-regulated-responsive-activated	medtr1g031590.1	Transcript	(at2g01480 : 848.0) O-fucosyltransferase family protein; LOCATED IN: chloroplast; EXPRESSED IN: 23 plant structures; EXPRESSED DURING: 15 growth stages; CONTAINS InterPro DOMAIN/s: GDP-fucose protein O-fucosyltransferase (InterPro:IPR019378); BEST Arabidopsis thaliana protein match is: O-fucosyltransferase family protein (TAIR:AT1G14970.1); Has 836 Blast hits to 825 proteins in 29 species: Archae…	-0.964111
17.2.3	hormone metabolism.auxin.induced-regulated-responsive-activated	medtr2g043250.1	Transcript	(at1g19220 : 705.0) Encodes an auxin response factor that contains the conserved VP1-B3 DNA-binding domain at its N-terminus and the Aux/IAA-like domains III and IV present in most ARFs at its C-terminus. The protein interacts with IAA1 (yeast two hybrid) and other auxin response elements such as ER7 and ER9 (yeast one hybrid). ARF19 protein can complement many aspects of the arf7 mutant phenotyp…	0.830353
17.2.3	hormone metabolism.auxin.induced-regulated-responsive-activated	medtr3g084150.1	Transcript	(p33080|ax10a_soybn : 147.0) Auxin-induced protein X10A - Glycine max (Soybean) & (gnl|cdd|66231 : 121.0) no description available & (at4g38840 : 115.0) SAUR-like auxin-responsive protein family ; FUNCTIONS IN: molecular_function unknown; INVOLVED IN: response to auxin stimulus, response to cold; LOCATED IN: plasma membrane; EXPRESSED IN: 21 plant structures; EXPRESSED DURING: 13 growth stages; C…	2.65733
17.2.3	hormone metabolism.auxin.induced-regulated-responsive-activated	medtr3g084240.1	Transcript	(gnl|cdd|66231 : 125.0) no description available & (p32295|arg7_phaau : 124.0) Indole-3-acetic acid-induced protein ARG7 - Phaseolus aureus (Mung bean) (Vigna radiata) & (at4g38840 : 113.0) SAUR-like auxin-responsive protein family ; FUNCTIONS IN: molecular_function unknown; INVOLVED IN: response to auxin stimulus, response to cold; LOCATED IN: plasma membrane; EXPRESSED IN: 21 plant structures; …	1.86501
17.2.3	hormone metabolism.auxin.induced-regulated-responsive-activated	medtr7g114980.1	Transcript	(at1g60710 : 377.0) Encodes ATB2.; ATB2; FUNCTIONS IN: oxidoreductase activity; INVOLVED IN: response to cadmium ion; EXPRESSED IN: 23 plant structures; EXPRESSED DURING: 14 growth stages; CONTAINS InterPro DOMAIN/s: Aldo/keto reductase (InterPro:IPR001395), Aldo/keto reductase subgroup (InterPro:IPR020471); BEST Arabidopsis thaliana protein match is: NAD(P)-linked oxidoreductase superfamily prot…	-1.91156
17.2.3	hormone metabolism.auxin.induced-regulated-responsive-activated	medtr7g114990.1	Transcript	(at1g60710 : 380.0) Encodes ATB2.; ATB2; FUNCTIONS IN: oxidoreductase activity; INVOLVED IN: response to cadmium ion; EXPRESSED IN: 23 plant structures; EXPRESSED DURING: 14 growth stages; CONTAINS InterPro DOMAIN/s: Aldo/keto reductase (InterPro:IPR001395), Aldo/keto reductase subgroup (InterPro:IPR020471); BEST Arabidopsis thaliana protein match is: NAD(P)-linked oxidoreductase superfamily prot…	-1.13365
17.2.3	hormone metabolism.auxin.induced-regulated-responsive-activated	medtr8g022440.1	Transcript	(at1g72430 : 89.0) SAUR-like auxin-responsive protein family ; CONTAINS InterPro DOMAIN/s: Auxin responsive SAUR protein (InterPro:IPR003676); BEST Arabidopsis thaliana protein match is: SAUR-like auxin-responsive protein family (TAIR:AT1G17345.1); Has 148 Blast hits to 148 proteins in 14 species: Archae - 0; Bacteria - 0; Metazoa - 0; Fungi - 0; Plants - 148; Viruses - 0; Other Eukaryotes - 0 (s…	2.30124
17.2.3	hormone metabolism.auxin.induced-regulated-responsive-activated	medtr8g026730.1	Transcript	(at2g46690 : 118.0) SAUR-like auxin-responsive protein family ; CONTAINS InterPro DOMAIN/s: Auxin responsive SAUR protein (InterPro:IPR003676); BEST Arabidopsis thaliana protein match is: SAUR-like auxin-responsive protein family (TAIR:AT3G61900.1); Has 1291 Blast hits to 1280 proteins in 26 species: Archae - 0; Bacteria - 0; Metazoa - 0; Fungi - 0; Plants - 1290; Viruses - 0; Other Eukaryotes - …	-0.900169
17.1.1	hormone metabolism.abscisic acid.synthesis-degradation	medtr5g090670.1	Transcript	(at3g21760 : 384.0) Encodes HYR1, a UDP glycosyltransferase (UGT). HYR1 glucosylates hypostatin, an inhibitor of cell expansion in vivo to form a bioactive glucoside.; HYPOSTATIN RESISTANCE 1 (HYR1); FUNCTIONS IN: UDP-glycosyltransferase activity, transferase activity, transferring glycosyl groups; INVOLVED IN: metabolic process; LOCATED IN: cellular_component unknown; EXPRESSED IN: 21 plant stru…	-1.19007
17.1.1.1.11	hormone metabolism.abscisic acid.synthesis-degradation.synthesis.short chain alcohol dehydrogenmase (ABA2)	medtr3g020670.1	Transcript	(at1g52340 : 360.0) Encodes a cytosolic short-chain dehydrogenase/reductase involved in the conversion of xanthoxin to ABA-aldehyde during ABA biosynthesis. Mutants are insensitive to sucrose and glucose.; ABA DEFICIENT 2 (ABA2); CONTAINS InterPro DOMAIN/s: NAD(P)-binding domain (InterPro:IPR016040), Glucose/ribitol dehydrogenase (InterPro:IPR002347), Short-chain dehydrogenase/reductase SDR (Inte…	-1.03486
17.1.1.1.11	hormone metabolism.abscisic acid.synthesis-degradation.synthesis.short chain alcohol dehydrogenmase (ABA2)	medtr4g052300.1	Transcript	(at3g51680 : 254.0) NAD(P)-binding Rossmann-fold superfamily protein; FUNCTIONS IN: oxidoreductase activity, binding, catalytic activity; INVOLVED IN: oxidation reduction, metabolic process; LOCATED IN: cellular_component unknown; EXPRESSED IN: cotyledon, root; CONTAINS InterPro DOMAIN/s: NAD(P)-binding domain (InterPro:IPR016040), Glucose/ribitol dehydrogenase (InterPro:IPR002347), Short-chain d…	-1.77249
17.1.1.2.1	hormone metabolism.abscisic acid.synthesis-degradation.degradation.8-hydroxylase	medtr8g072260.1	Transcript	(at4g19230 : 721.0) Encodes a protein with ABA 8'-hydroxylase activity, involved in ABA catabolism. Member of the CYP707A gene family. CYP707A1 appears to play an important role in determining the ABA levels in dry seeds. Gene involved in postgermination growth. Overexpression of CYP707A1 leads to a decrease in ABA levels and a reduction in after-ripening period to break dormancy.; "cytochrome P4…	3.34486
17.1.2	hormone metabolism.abscisic acid.signal transduction	medtr2g040500.1	Transcript	(at1g17550 : 358.0) Protein Phosphatase 2C; homology to ABI2 (HAB2); FUNCTIONS IN: protein serine/threonine phosphatase activity, catalytic activity; INVOLVED IN: protein amino acid dephosphorylation; LOCATED IN: protein serine/threonine phosphatase complex; EXPRESSED IN: 23 plant structures; EXPRESSED DURING: 14 growth stages; CONTAINS InterPro DOMAIN/s: Protein phosphatase 2C, manganese/magnesi…	-3.0022
17.1.2	hormone metabolism.abscisic acid.signal transduction	medtr7g090740.1	Transcript	(at3g57200 : 698.0) unknown protein; BEST Arabidopsis thaliana protein match is: unknown protein (TAIR:AT2G41451.1); Has 94 Blast hits to 94 proteins in 31 species: Archae - 0; Bacteria - 12; Metazoa - 0; Fungi - 0; Plants - 77; Viruses - 0; Other Eukaryotes - 5 (source: NCBI BLink). & (reliability: 1342.0) & (original description: no original description)	0.612311
17.1.2	hormone metabolism.abscisic acid.signal transduction	medtr8g102550.1	Transcript	(at4g26080 : 285.0) Involved in abscisic acid (ABA) signal transduction. Negative regulator of ABA promotion of stomatal closure.; ABA INSENSITIVE 1 (ABI1); CONTAINS InterPro DOMAIN/s: Protein phosphatase 2C, manganese/magnesium aspartate binding site (InterPro:IPR000222), Protein phosphatase 2C-related (InterPro:IPR001932), Protein phosphatase 2C (InterPro:IPR015655), Protein phosphatase 2C, N-t…	2.57296
17.1.3	hormone metabolism.abscisic acid.induced-regulated-responsive-activated	medtr3g099010.1	Transcript	(q07764|hva22_horvu : 145.0) Protein HVA22 - Hordeum vulgare (Barley) & (at5g50720 : 144.0) Encodes one of five HVA22 homologs in Arabidopsis. HVA22 is an ABA- and stress-inducible gene first isolated from barley. Members of this gene family have only been found in eukaryotes. AtHVA22e mRNA is upregulated to varying degrees in response to cold stress, salt stress, ABA treatment or dehydration.; H…	1.74722
17.1.3	hormone metabolism.abscisic acid.induced-regulated-responsive-activated	medtr7g108650.1	Transcript	(at2g47770 : 120.0) Encodes a membrane-bound protein designated AtTSPO (Arabidopsis thaliana TSPO-related). AtTSPO is related to the bacterial outer membrane tryptophan-rich sensory protein (TspO) and the mammalian mitochondrial 18 kDa Translocator Protein (18 kDa TSPO), members of the TspO/MBR domain-containing membrane proteins. Mainly detected in dry seeds, but can be induced in vegetative tis…	3.65793
17.3.1.1.3	hormone metabolism.brassinosteroid.synthesis-degradation.BRs.CPD	medtr3g070380.1	Transcript	(at5g05690 : 698.0) Encodes a member of the CP90A family, a cytochrome P450 monooxygenase which converts 6-deoxocathasterone to 6-deoxoteasterone in the late C6 oxidation pathway and cathasterone to teasterone in the early C6 oxidation pathway of brassinolide biosynthesis. Expressed in cotyledons and leaves. Mutants display de-etiolation and derepression of light-induced genes in the dark, dwarfi…	-1.84815
17.3.1.2.8	hormone metabolism.brassinosteroid.synthesis-degradation.sterols.DWF1	medtr4g074350.1	Transcript	(p93472|dim_pea : 1095.0) Cell elongation protein diminuto - Pisum sativum (Garden pea) & (at3g19820 : 926.0) Involved in the conversion of the early brassinosteroid precursor 24-methylenecholesterol to campesterol. Brassinosteroids affect cellular elongation. Mutants have dwarf phenotype. DWF1 is a Ca2+-dependent calmodulin-binding protein.; DWARF 1 (DWF1); CONTAINS InterPro DOMAIN/s: FAD-linked…	2.51694
17.3.2.2	hormone metabolism.brassinosteroid.signal transduction.BZR	medtr2g075410.1	Transcript	(at1g78700 : 303.0) BES1/BZR1 homolog 4 (BEH4); FUNCTIONS IN: transcription regulator activity; INVOLVED IN: biological_process unknown; LOCATED IN: cellular_component unknown; EXPRESSED IN: 23 plant structures; EXPRESSED DURING: 13 growth stages; CONTAINS InterPro DOMAIN/s: BZR1, transcriptional repressor (InterPro:IPR008540); BEST Arabidopsis thaliana protein match is: BES1/BZR1 homolog 3 (TAIR…	-0.873393
17.3.2.99	hormone metabolism.brassinosteroid.signal transduction.other	medtr1g076470.1	Transcript	(at2g17230 : 431.0) EXORDIUM like 5 (EXL5); FUNCTIONS IN: molecular_function unknown; INVOLVED IN: biological_process unknown; LOCATED IN: endomembrane system; EXPRESSED IN: 22 plant structures; EXPRESSED DURING: 13 growth stages; CONTAINS InterPro DOMAIN/s: Phosphate-induced protein 1 (InterPro:IPR006766); BEST Arabidopsis thaliana protein match is: EXORDIUM like 1 (TAIR:AT2G35150.1); Has 402 Bl…	1.27744
17.5.1	hormone metabolism.ethylene.synthesis-degradation	medtr1g043760.1	Transcript	(at1g06620 : 360.0) encodes a protein whose sequence is similar to a 2-oxoglutarate-dependent dioxygenase; 2-oxoglutarate (2OG) and Fe(II)-dependent oxygenase superfamily protein; CONTAINS InterPro DOMAIN/s: Oxoglutarate/iron-dependent oxygenase (InterPro:IPR005123); BEST Arabidopsis thaliana protein match is: 2-oxoglutarate (2OG) and Fe(II)-dependent oxygenase superfamily protein (TAIR:AT3G61400…	1.72828
17.5.1	hormone metabolism.ethylene.synthesis-degradation	medtr3g040410.1	Transcript	(gnl|cdd|35365 : 212.0) no description available & (gnl|cdd|33294 : 179.0) no description available & (at3g11180 : 137.0) 2-oxoglutarate (2OG) and Fe(II)-dependent oxygenase superfamily protein; FUNCTIONS IN: oxidoreductase activity, iron ion binding; INVOLVED IN: oxidation reduction; LOCATED IN: cellular_component unknown; EXPRESSED IN: inflorescence meristem, male gametophyte, flower, pollen tu…	-1.0728
17.5.1	hormone metabolism.ethylene.synthesis-degradation	medtr8g009120.1	Transcript	(at5g59540 : 381.0) 2-oxoglutarate (2OG) and Fe(II)-dependent oxygenase superfamily protein; FUNCTIONS IN: oxidoreductase activity; INVOLVED IN: biological_process unknown; LOCATED IN: cellular_component unknown; EXPRESSED IN: 17 plant structures; EXPRESSED DURING: 9 growth stages; CONTAINS InterPro DOMAIN/s: Oxoglutarate/iron-dependent oxygenase (InterPro:IPR005123); BEST Arabidopsis thaliana pr…	-1.4615
17.5.2	hormone metabolism.ethylene.signal transduction	medtr1g043350.1	Transcript	(at3g23240 : 160.0) encodes a member of the ERF (ethylene response factor) subfamily B-3 of ERF/AP2 transcription factor family (ERF1). The protein contains one AP2 domain. There are 18 members in this subfamily including ATERF-1, ATERF-2, AND ATERF-5. EREBP like protein that binds GCC box of ethylene regulated promoters such as basic chitinases. Constitutive expression of ERF1 phenocopies ethyle…	-3.14009
17.5.2	hormone metabolism.ethylene.signal transduction	medtr2g015040.1	Transcript	(at5g47220 : 108.0) Encodes a member of the ERF (ethylene response factor) subfamily B-3 of ERF/AP2 transcription factor family (ATERF-2). The protein contains one AP2 domain. Functions as activator of GCC box??dependent transcription. Positive regulator of JA-responsive defense genes and resistance to F. oxysporum and enhances JA inhibition of root elongation.; ethylene responsive element bindin…	-2.02141
17.5.2	hormone metabolism.ethylene.signal transduction	medtr3g106290.1	Transcript	(at5g25190 : 172.0) encodes a member of the ERF (ethylene response factor) subfamily B-6 of ERF/AP2 transcription factor family. The protein contains one AP2 domain. There are 12 members in this subfamily including RAP2.11.; Integrase-type DNA-binding superfamily protein; CONTAINS InterPro DOMAIN/s: DNA-binding, integrase-type (InterPro:IPR016177), Pathogenesis-related transcriptional factor/ERF,…	4.21514
Cell wall-related
10.5.1.1	cell wall.cell wall proteins.AGPs.AGP	medtr5g098060.1	Transcript	(at2g04780 : 202.0) fasciclin-like arabinogalactan-protein 7 (Fla7); FASCICLIN-like arabinoogalactan 7 (FLA7); LOCATED IN: anchored to plasma membrane, plasma membrane, anchored to membrane, membrane; EXPRESSED IN: 22 plant structures; EXPRESSED DURING: 13 growth stages; CONTAINS InterPro DOMAIN/s: FAS1 domain (InterPro:IPR000782); BEST Arabidopsis thaliana protein match is: FASCICLIN-like arabin…	1.8336
10.5.1.1	cell wall.cell wall proteins.AGPs.AGP	medtr7g106760.1	Transcript	(at3g52370 : 512.0) FASCICLIN-like arabinogalactan protein 15 precursor (FLA15); INVOLVED IN: cell adhesion; LOCATED IN: endomembrane system; EXPRESSED IN: 21 plant structures; EXPRESSED DURING: 13 growth stages; CONTAINS InterPro DOMAIN/s: FAS1 domain (InterPro:IPR000782); BEST Arabidopsis thaliana protein match is: FASCICLIN-like arabinogalactan protein 16 precursor (TAIR:AT2G35860.1); Has 1194…	1.27239
10.5.3	cell wall.cell wall proteins.LRR	medtr6g086115.1	Transcript	(at3g24480 : 541.0) Leucine-rich repeat (LRR) family protein; FUNCTIONS IN: structural constituent of cell wall; LOCATED IN: cell wall, plant-type cell wall; EXPRESSED IN: 22 plant structures; EXPRESSED DURING: 13 growth stages; CONTAINS InterPro DOMAIN/s: Leucine-rich repeat-containing N-terminal domain, type 2 (InterPro:IPR013210), Leucine-rich repeat (InterPro:IPR001611); BEST Arabidopsis thal…	0.791021
10.8.1	cell wall.pectin*esterases.PME	medtr1g054880.1	Transcript	(at1g02810 : 607.0) Plant invertase/pectin methylesterase inhibitor superfamily; FUNCTIONS IN: enzyme inhibitor activity, pectinesterase activity; INVOLVED IN: cell wall modification; LOCATED IN: endomembrane system, cell wall, plant-type cell wall; EXPRESSED IN: 14 plant structures; EXPRESSED DURING: 6 growth stages; CONTAINS InterPro DOMAIN/s: Pectinesterase, active site (InterPro:IPR018040), P…	-1.79399
10.8.1	cell wall.pectin*esterases.PME	medtr3g091380.1	Transcript	(at3g49220 : 765.0) Plant invertase/pectin methylesterase inhibitor superfamily; FUNCTIONS IN: enzyme inhibitor activity, pectinesterase activity; INVOLVED IN: cell wall modification; LOCATED IN: cell wall, plant-type cell wall; EXPRESSED IN: 22 plant structures; EXPRESSED DURING: 13 growth stages; CONTAINS InterPro DOMAIN/s: Pectinesterase, active site (InterPro:IPR018040), Pectin lyase fold/vir…	1.92055
10.8.1	cell wall.pectin*esterases.PME	medtr3g115050.1	Transcript	(at1g76160 : 881.0) SKU5 similar 5 (sks5); FUNCTIONS IN: oxidoreductase activity, copper ion binding; INVOLVED IN: oxidation reduction; LOCATED IN: apoplast, cell wall, plant-type cell wall; EXPRESSED IN: 24 plant structures; EXPRESSED DURING: 13 growth stages; CONTAINS InterPro DOMAIN/s: Multicopper oxidase, type 3 (InterPro:IPR011707), Cupredoxin (InterPro:IPR008972), Multicopper oxidase, type …	4.17501
10.8.1	cell wall.pectin*esterases.PME	medtr6g012800.1	Transcript	(at3g29090 : 524.0) Encodes an atypical pectin methylesterase that does not require salt for its activity and has a blockwise mode of pectin demethylesterification.; pectin methylesterase 31 (PME31); FUNCTIONS IN: pectinesterase activity; INVOLVED IN: pectin metabolic process; LOCATED IN: cell wall, plant-type cell wall; EXPRESSED IN: 23 plant structures; EXPRESSED DURING: 13 growth stages; CONTA…	-1.84904
10.8.2	cell wall.pectin*esterases.acetyl esterase	medtr4g124320.1	Transcript	(gnl|cdd|39488 : 593.0) no description available & (gnl|cdd|66926 : 572.0) no description available & (at5g26670 : 569.0) Pectinacetylesterase family protein; CONTAINS InterPro DOMAIN/s: Pectinacetylesterase (InterPro:IPR004963); BEST Arabidopsis thaliana protein match is: Pectinacetylesterase family protein (TAIR:AT3G05910.1); Has 35333 Blast hits to 34131 proteins in 2444 species: Archae - 798;…	2.09474
10.8.2	cell wall.pectin*esterases.acetyl esterase	medtr8g072000.1	Transcript	(gnl|cdd|66926 : 568.0) no description available & (at4g19420 : 550.0) Pectinacetylesterase family protein; CONTAINS InterPro DOMAIN/s: Pectinacetylesterase (InterPro:IPR004963); BEST Arabidopsis thaliana protein match is: Pectinacetylesterase family protein (TAIR:AT4G19410.1); Has 543 Blast hits to 535 proteins in 96 species: Archae - 2; Bacteria - 44; Metazoa - 119; Fungi - 0; Plants - 298; Vir…	1.32072
10.7	cell wall.modification	medtr4g081950.1	Transcript	(at2g03090 : 403.0) member of Alpha-Expansin Gene Family. Naming convention from the Expansin Working Group (Kende et al, 2004. Plant Mol Bio). Involved in the formation of nematode-induced syncytia in roots of Arabidopsis thaliana.; expansin A15 (EXPA15); INVOLVED IN: plant-type cell wall modification involved in multidimensional cell growth, syncytium formation, unidimensional cell growth, plan…	2.96292
10.7	cell wall.modification	medtr4g098930.1	Transcript	(q850k7|exlb1_orysa : 325.0) Expansin-like B1 precursor (OsEXLB1) (Expensin-related 1) (OsEXPR1) (OsaEXPb3.1) - Oryza sativa (Rice) & (at4g17030 : 190.0) Encodes EXLB1 (expansin-like B1), a member of the expansin family.; expansin-like B1 (EXLB1); INVOLVED IN: sexual reproduction, unidimensional cell growth, plant-type cell wall loosening; LOCATED IN: endomembrane system, extracellular region; EX…	-2.34967
10.7	cell wall.modification	medtr7g061720.1	Transcript	(at2g39700 : 416.0) putative expansin. Naming convention from the Expansin Working Group (Kende et al, 2004. Plant Mol Bio). Involved in the formation of nematode-induced syncytia in roots of Arabidopsis thaliana.; expansin A4 (EXPA4); CONTAINS InterPro DOMAIN/s: Barwin-related endoglucanase (InterPro:IPR009009), Pollen allergen, N-terminal (InterPro:IPR014734), Expansin (InterPro:IPR002963), Rar…	-1.35139
10.7	cell wall.modification	medtr7g084770.1	Transcript	(q8lnz5|xthb_phaan : 548.0) Probable xyloglucan endotransglucosylase/hydrolase protein B precursor (EC 2.4.1.207) (VaXTH2) - Phaseolus angularis (Adzuki bean) (Vigna angularis) & (at5g13870 : 504.0) EXGT-A4, endoxyloglucan transferase,; xyloglucan endotransglucosylase/hydrolase 5 (XTH5); FUNCTIONS IN: hydrolase activity, acting on glycosyl bonds, hydrolase activity, hydrolyzing O-glycosyl compoun…	4.87511
10.7	cell wall.modification	medtr8g064180.1	Transcript	(at1g10550 : 383.0) Encodes a membrane-localized protein that is predicted to function during cell wall modification.Overexpression of XTH33 results in abnormal cell morphology. It's expression is under epigenetic control by ATX1.; xyloglucan:xyloglucosyl transferase 33 (XTH33); FUNCTIONS IN: hydrolase activity, acting on glycosyl bonds, hydrolase activity, hydrolyzing O-glycosyl compounds, xylog…	3.08923
10.3	cell wall.hemicellulose synthesis	medtr3g037560.1	Transcript	(q9m5q1|fut1_pea : 803.0) Galactoside 2-alpha-L-fucosyltransferase (EC 2.4.1.69) (Xyloglucan alpha-(1,2)-fucosyltransferase) (PsFT1) - Pisum sativum (Garden pea) & (at2g03220 : 653.0) member of Glycosyltransferase Family- 37; fucosyltransferase 1 (FT1); FUNCTIONS IN: transferase activity, transferring glycosyl groups, fucosyltransferase activity; INVOLVED IN: plant-type cell wall biogenesis, xylo…	0.787223
10.3.2	cell wall.hemicellulose synthesis.glucuronoxylan	medtr5g016600.1	Transcript	(at5g67230 : 558.0) Encodes a member of the GT43 family glycosyltransferases involved in glucuronoxylan biosynthesis: AT2G37090 (IRX9) and AT1G27600 (IRX9-L or I9H, IRX9 homolog); AT4G36890 (IRX14) and AT5G67230 (IRX14-L or I14H, IRX14 homolog). They form two functionally non-redundant groups essential for the normal elongation of glucuronoxylan backbone. I9H functions redundantly with IRX9, I14H…	0.903018
10.2	cell wall.cellulose synthesis	medtr2g028480.1	Transcript	(ipr001701 : 1500.0) Glycoside hydrolase, family 9 & (at5g49720 : 951.0) Encodes a membrane-bound endo-1,4-beta-D-glucanase, involved in cellulose biosynthesis. Loss-of-function mutants have severe cellulose-deficient phenotypes. During cell elongation, KOR1 is associated with Golgi apparatus and early endosome. Inhibition of cellulose biosynthesis promoted a redistribution of KOR1 in subcellular…	1.41722
10.2.1	cell wall.cellulose synthesis.cellulose synthase	medtr2g087980.1	Transcript	(at2g32540 : 628.0) encodes a gene similar to cellulose synthase; cellulose synthase-like B4 (CSLB04); FUNCTIONS IN: cellulose synthase activity, transferase activity, transferring glycosyl groups, transferase activity; INVOLVED IN: cellulose biosynthetic process, polysaccharide biosynthetic process; LOCATED IN: membrane; CONTAINS InterPro DOMAIN/s: Cellulose synthase (InterPro:IPR005150); BEST A…	-0.982776
10.2.1	cell wall.cellulose synthesis.cellulose synthase	medtr3g030040.1	Transcript	(at5g05170 : 1890.0) Encodes a cellulose synthase isomer. CESA3 mutants have cellulose defect in the primary cell wall. Multiple lines of evidence suggest that CESA3, along with CESA1 and CESA6 are present in the same plasma membrane complex for cellulose biosynthesis. As inferred from the null role of secondary wall-type CesAs, included in a set of five primary wall-type CesAs that may support t…	0.991495
10.2.1	cell wall.cellulose synthesis.cellulose synthase	medtr3g107520.1	Transcript	(at4g32410 : 1901.0) Encodes a cellulose synthase isomer. CESA1 mutants have cellulose defect in the primary cell wall. Multiple lines of evidence suggest that CESA1, along with CESA3 and CESA6 are present in the same plasma membrane complex for cellulose biosynthesis. lasma membrane complex for cellulose biosynthesis. As inferred from the null role of secondary wall-type CesAs, included in a set…	0.882609
10.2.1	cell wall.cellulose synthesis.cellulose synthase	medtr4g077910.1	Transcript	(at3g03050 : 2025.0) encodes a cellulose synthase like protein. mutations initiate root hairs that rupture at their tip soon after initiation. is required for the synthesis of a noncellulosic wall polysaccharide.; cellulose synthase-like D3 (CSLD3); FUNCTIONS IN: cellulose synthase activity, transferase activity, transferring glycosyl groups; INVOLVED IN: response to cyclopentenone, plant-type ce…	0.651894
10.2.1	cell wall.cellulose synthesis.cellulose synthase	medtr8g092590.1	Transcript	(at5g64740 : 1821.0) Encodes a cellulose synthase isomer. CESA6 mutants have cellulose defect in the primary cell wall. Multiple lines of evidence suggest that CESA6, along with CESA1 and CESA3 are present in the same plasma membrane complex for cellulose biosynthesis. CESA2 and CESA5 are related to CESA6, having partially redundant roles. As inferred from the null role of secondary wall-type Ces…	1.16576
10.2.2	cell wall.cellulose synthesis.COBRA	medtr7g015950.1	Transcript	(at5g60920 : 690.0) Encodes a glycosylphosphatidylinositol-anchored protein localized primarily in the plasma membrane of the longitudinal sides of root cells. Necessary for oriented cell expansion in Arabidopsis. Cob mutants have abnormal roots that expand radially rather than longitudinally under certain growth conditions.; COBRA (COB); FUNCTIONS IN: molecular_function unknown; INVOLVED IN: res…	0.937125
10.4	cell wall.pectin synthesis	medtr7g055600.1	Transcript	(at3g25140 : 796.0) Quasimodo1, encodes a glycosyltransferase, involved in homogalacturonan biosynthesis; mutant shows cell adhesion defect and lower wall uronic acid content.; QUASIMODO 1 (QUA1); FUNCTIONS IN: transferase activity, transferring hexosyl groups, polygalacturonate 4-alpha-galacturonosyltransferase activity, transferase activity, transferring glycosyl groups; INVOLVED IN: carbohydra…	0.839434
10.6.1	cell wall.degradation.cellulases and beta -1,4-glucanases	medtr5g069740.1	Transcript	(at3g47000 : 860.0) Glycosyl hydrolase family protein; FUNCTIONS IN: hydrolase activity, hydrolyzing O-glycosyl compounds; INVOLVED IN: carbohydrate metabolic process; LOCATED IN: cellular_component unknown; EXPRESSED IN: 23 plant structures; EXPRESSED DURING: 13 growth stages; CONTAINS InterPro DOMAIN/s: Glycoside hydrolase, family 3, N-terminal (InterPro:IPR001764), Glycoside hydrolase, family …	2.78478
10.6.2	cell wall.degradation.mannan-xylose-arabinose-fucose	medtr1g018200.1	Transcript	(p48981|bgal_maldo : 1113.0) Beta-galactosidase precursor (EC 3.2.1.23) (Lactase) (Acid beta-galactosidase) (Exo-(1-->4)-beta-D-galactanase) - Malus domestica (Apple) (Malus sylvestris) & (at4g26140 : 1080.0) putative beta-galactosidase; beta-galactosidase 12 (BGAL12); FUNCTIONS IN: cation binding, beta-galactosidase activity, hydrolase activity, hydrolyzing O-glycosyl compounds, catalytic activi…	3.67567
10.6.2	cell wall.degradation.mannan-xylose-arabinose-fucose	medtr1g106790.1	Transcript	(at4g33840 : 546.0) Glycosyl hydrolase family 10 protein; FUNCTIONS IN: cation binding, hydrolase activity, hydrolyzing O-glycosyl compounds, catalytic activity; INVOLVED IN: carbohydrate metabolic process; LOCATED IN: endomembrane system; CONTAINS InterPro DOMAIN/s: Glycoside hydrolase, family 10 (InterPro:IPR001000), Carbohydrate-binding, CenC-like (InterPro:IPR003305), Glycoside hydrolase, cat…	3.13568
10.6.2	cell wall.degradation.mannan-xylose-arabinose-fucose	medtr4g126330.1	Transcript	(p48981|bgal_maldo : 308.0) Beta-galactosidase precursor (EC 3.2.1.23) (Lactase) (Acid beta-galactosidase) (Exo-(1-->4)-beta-D-galactanase) - Malus domestica (Apple) (Malus sylvestris) & (at3g52840 : 296.0) beta-galactosidase 2 (BGAL2); FUNCTIONS IN: cation binding, beta-galactosidase activity, hydrolase activity, hydrolyzing O-glycosyl compounds, catalytic activity; INVOLVED IN: lactose cataboli…	2.97819
10.6.2	cell wall.degradation.mannan-xylose-arabinose-fucose	medtr5g020890.1	Transcript	(at5g66460 : 562.0) Glycosyl hydrolase superfamily protein; FUNCTIONS IN: cation binding, hydrolase activity, hydrolyzing O-glycosyl compounds, catalytic activity; INVOLVED IN: carbohydrate metabolic process; LOCATED IN: endomembrane system; EXPRESSED IN: 17 plant structures; EXPRESSED DURING: 4 anthesis, C globular stage, 4 leaf senescence stage, petal differentiation and expansion stage, E expa…	1.1475
10.6.2	cell wall.degradation.mannan-xylose-arabinose-fucose	medtr5g062320.1	Transcript	(at1g78060 : 974.0) Glycosyl hydrolase family protein; FUNCTIONS IN: hydrolase activity, hydrolyzing O-glycosyl compounds; INVOLVED IN: carbohydrate metabolic process; LOCATED IN: apoplast, cell wall, chloroplast, plant-type cell wall; EXPRESSED IN: 22 plant structures; EXPRESSED DURING: 13 growth stages; CONTAINS InterPro DOMAIN/s: Glycoside hydrolase, family 3, N-terminal (InterPro:IPR001764), …	1.52202
10.6.2	cell wall.degradation.mannan-xylose-arabinose-fucose	medtr5g062370.1	Transcript	(at1g78060 : 970.0) Glycosyl hydrolase family protein; FUNCTIONS IN: hydrolase activity, hydrolyzing O-glycosyl compounds; INVOLVED IN: carbohydrate metabolic process; LOCATED IN: apoplast, cell wall, chloroplast, plant-type cell wall; EXPRESSED IN: 22 plant structures; EXPRESSED DURING: 13 growth stages; CONTAINS InterPro DOMAIN/s: Glycoside hydrolase, family 3, N-terminal (InterPro:IPR001764), …	1.85498
10.6.3	cell wall.degradation.pectate lyases and polygalacturonases	medtr2g435340.1	Transcript	(at3g16850 : 540.0) Pectin lyase-like superfamily protein; FUNCTIONS IN: polygalacturonase activity; INVOLVED IN: carbohydrate metabolic process; LOCATED IN: vacuole, plant-type cell wall; EXPRESSED IN: 23 plant structures; EXPRESSED DURING: 13 growth stages; CONTAINS InterPro DOMAIN/s: Pectin lyase fold/virulence factor (InterPro:IPR011050), Glycoside hydrolase, family 28 (InterPro:IPR000743), P…	2.16564
10.6.3	cell wall.degradation.pectate lyases and polygalacturonases	medtr2g103650.1	Transcript	(at5g17200 : 327.0) Pectin lyase-like superfamily protein; FUNCTIONS IN: polygalacturonase activity; INVOLVED IN: carbohydrate metabolic process; LOCATED IN: endomembrane system; EXPRESSED IN: leaf whorl, sperm cell, sepal, flower, pedicel; EXPRESSED DURING: 4 anthesis, petal differentiation and expansion stage; CONTAINS InterPro DOMAIN/s: Pectin lyase fold/virulence factor (InterPro:IPR011050), …	3.42789
10.6.3	cell wall.degradation.pectate lyases and polygalacturonases	medtr4g120730.1	Transcript	(at3g16850 : 533.0) Pectin lyase-like superfamily protein; FUNCTIONS IN: polygalacturonase activity; INVOLVED IN: carbohydrate metabolic process; LOCATED IN: vacuole, plant-type cell wall; EXPRESSED IN: 23 plant structures; EXPRESSED DURING: 13 growth stages; CONTAINS InterPro DOMAIN/s: Pectin lyase fold/virulence factor (InterPro:IPR011050), Glycoside hydrolase, family 28 (InterPro:IPR000743), P…	1.33188
10.6.3	cell wall.degradation.pectate lyases and polygalacturonases	medtr7g078680.1	Transcript	(at3g61490 : 686.0) Pectin lyase-like superfamily protein; FUNCTIONS IN: polygalacturonase activity; INVOLVED IN: carbohydrate metabolic process; LOCATED IN: endomembrane system; EXPRESSED IN: 22 plant structures; EXPRESSED DURING: 14 growth stages; CONTAINS InterPro DOMAIN/s: Pectin lyase fold/virulence factor (InterPro:IPR011050), Glycoside hydrolase, family 28 (InterPro:IPR000743), Pectin lyas…	-1.67353
10.1.1.2	cell wall.precursor synthesis.NDP sugar pyrophosphorylase.GDP fucose and fucokinase	medtr7g117870.1	Transcript	(at1g01220 : 1442.0) Encodes a bifunctional enzyme that has both L-fucokinase and GDP-L-fucose pyrophosphorylase activities. It catalyzes the two steps of the L-fucose salvage pathway for the generation of activated GDP-L-fucose. This pathway seems to be of minor importance for cell wall polysaccharide biosynthesis compared to the de novo GDP-L-fucose biosynthesis pathway in Arabidopsis.; L-fucok…	0.782522
10.1.5	cell wall.precursor synthesis.UXS	medtr1g067530.1	Transcript	(at3g53520 : 645.0) Encodes an isoform of UDP-glucuronic acid decarboxylase, which is predicted to be membrane-bound by PSORT analysis. This enzyme produces UDP-xylose, which is a substrate for many cell wall carbohydrates including hemicellulose and pectin. UDP-xylose is also known to feedback regulate several cell wall biosynthetic enzymes.; UDP-glucuronic acid decarboxylase 1 (UXS1); CONTAINS …	0.986321
10.1.5	cell wall.precursor synthesis.UXS	medtr1g088480.1	Transcript	(at3g62830 : 680.0) encodes an isoform of UDP-glucuronic acid decarboxylase, which is predicted to be membrane-bound by PSORT. This enzyme produces UDP-xylose, which is a substrate for many cell wall carbohydrates including hemicellulose and pectin. UDP-xylose is also known to feedback regulate several cell wall biosynthetic enzymes.; UDP-GLUCURONIC ACID DECARBOXYLASE 2 (UXS2); FUNCTIONS IN: UDP-…	1.59069
10.1.6	cell wall.precursor synthesis.GAE	medtr4g024600.1	Transcript	(at4g00110 : 711.0) Encodes a putative membrane-anchored UDP-D-glucuronate 4-epimerase.; UDP-D-glucuronate 4-epimerase 3 (GAE3); FUNCTIONS IN: UDP-glucuronate 4-epimerase activity, catalytic activity; INVOLVED IN: cellular metabolic process, carbohydrate metabolic process, nucleotide-sugar metabolic process, metabolic process; LOCATED IN: membrane; EXPRESSED IN: 23 plant structures; EXPRESSED DUR…	1.3916
10.1.6	cell wall.precursor synthesis.GAE	medtr4g129820.1	Transcript	(at4g30440 : 740.0) UDP-D-glucuronate 4-epimerase; UDP-D-glucuronate 4-epimerase 1 (GAE1); FUNCTIONS IN: UDP-glucuronate 4-epimerase activity, catalytic activity; INVOLVED IN: cellular metabolic process, carbohydrate metabolic process, nucleotide-sugar metabolic process, metabolic process; LOCATED IN: cellular_component unknown; EXPRESSED IN: 24 plant structures; EXPRESSED DURING: 15 growth stage…	1.35546
10.1.9	cell wall.precursor synthesis.MUR4	medtr8g089180.1	Transcript	(at1g30620 : 708.0) encodes a type-II membrane protein that catalyzes 4-epimerization of UDP-D-Xylose to UDP-L-Arabinose in vitro, the nucleotide sugar used by glycosyltransferases in the arabinosylation of cell wall polysaccharides and wall-resident proteoglycans.; MURUS 4 (MUR4); FUNCTIONS IN: UDP-arabinose 4-epimerase activity, catalytic activity; INVOLVED IN: plant-type cell wall biogenesis, …	1.90427
10.1.12.1	cell wall.precursor synthesis.KDO pathway.arabinose-5-phosphate isomerase	medtr7g097060.1	Transcript	(at3g54690 : 434.0) Sugar isomerase (SIS) family protein; FUNCTIONS IN: isomerase activity, sugar binding; INVOLVED IN: carbohydrate metabolic process; EXPRESSED IN: 23 plant structures; EXPRESSED DURING: 15 growth stages; CONTAINS InterPro DOMAIN/s: KpsF/GutQ (InterPro:IPR004800), Sugar isomerase (SIS) (InterPro:IPR001347), Cystathionine beta-synthase, core (InterPro:IPR000644); Has 8722 Blast h…	1.27553
10.1.30.1	cell wall.precursor synthesis.sugar kinases.galacturonic acid kinase	medtr8g101540.1	Transcript	(at3g10700 : 516.0) Encodes a GHMP kinase family protein that acts as a galacturonic acid-1-phosphate kinase that catalyzes the production of galacturonic acid-1-phosphate. This is a precursor of the important cell wall building block UDP-galacturonic acid. Based on gene trap line GT8007, the gene appears to be expressed in a petal and stamen-specific manner, between flower stages 8 to 11, howeve…	1.48989
Sucrose and starch metabolism
2.1.2.1	major CHO metabolism.synthesis.starch.AGPase	medtr3g116860.1	Transcript	(q00081|glgl1_soltu : 756.0) Glucose-1-phosphate adenylyltransferase large subunit 1 (EC 2.7.7.27) (ADP-glucose synthase) (ADP-glucose pyrophosphorylase) (AGPase S) (Alpha-D-glucose-1-phosphate adenyl transferase) (Fragment) - Solanum tuberosum (Potato) & (at4g39210 : 742.0) Encodes the large subunit of ADP-Glucose Pyrophosphorylase which catalyzes the first, rate limiting step in starch biosynth…	1.41954
2.1.2.3	major CHO metabolism.synthesis.starch.starch branching	medtr3g053220.1	Transcript	(at3g20440 : 1343.0) BE1 ia a putative glycoside hydrolase. It plays vital roles during embryogenesis and in carbohydrate metabolism. Mutation in BE1 has pleotrophic effect on the whole plant development.; EMBRYO DEFECTIVE 2729 (EMB2729); FUNCTIONS IN: cation binding, catalytic activity, alpha-amylase activity; INVOLVED IN: post-embryonic development, carbohydrate metabolic process, embryo develo…	1.56665
2.1.2.3	major CHO metabolism.synthesis.starch.starch branching	medtr3g115340.1	Transcript	(p30924|glgb_soltu : 1227.0) 1,4-alpha-glucan branching enzyme (EC 2.4.1.18) (Starch branching enzyme) (Q-enzyme) - Solanum tuberosum (Potato) & (at5g03650 : 799.0) Encodes starch branching enzyme (E.C.2.4.1.18) similar to SBE2 from maize and rice. Expressed throughout the plant and highest in seedlings and cauline leaves.; starch branching enzyme 2.2 (SBE2.2); FUNCTIONS IN: 1,4-alpha-glucan bran…	2.38558
2.2.2.1.2	major CHO metabolism.degradation.starch.starch cleavage.beta amylase	medtr5g013620.1	Transcript	(at4g17090 : 783.0) Encodes a beta-amylase targeted to the chloroplast. Transgenic BMY8 RNAi lines fail to accumulate maltose during cold shock suggesting that maltose accumulation coincides with BMY8 expression. Apart from maltose, the sugar content of the RNAi lines were similar to wildtype (glucose and sucrose unaffected).; chloroplast beta-amylase (CT-BMY); CONTAINS InterPro DOMAIN/s: Glycosi…	-1.94685
2.2.2.1.2	major CHO metabolism.degradation.starch.starch cleavage.beta amylase	medtr5g013640.1	Transcript	(at4g17090 : 796.0) Encodes a beta-amylase targeted to the chloroplast. Transgenic BMY8 RNAi lines fail to accumulate maltose during cold shock suggesting that maltose accumulation coincides with BMY8 expression. Apart from maltose, the sugar content of the RNAi lines were similar to wildtype (glucose and sucrose unaffected).; chloroplast beta-amylase (CT-BMY); CONTAINS InterPro DOMAIN/s: Glycosi…	-1.86402
2.2.2.2	major CHO metabolism.degradation.starch.starch phosphorylase	medtr0288s0040.1	Transcript	(p53536|phsl_vicfa : 1496.0) Alpha-1,4 glucan phosphorylase L isozyme, chloroplast precursor (EC 2.4.1.1) (Starch phosphorylase L) - Vicia faba (Broad bean) & (at3g29320 : 1333.0) Encodes a plastidic alpha-glucan phosphorylase. In vitro, the enzyme has a preference for maltooligosaccharides, such as maltoheptaose.; Glycosyl transferase, family 35; FUNCTIONS IN: phosphorylase activity, transferase…	1.84666
2.2.1.1	major CHO metabolism.degradation.sucrose.fructokinase	medtr4g019165.1	Transcript	(at3g54090 : 616.0) Encodes a fructokinase-like protein (AT3G54090/FLN1, AT1G69200/FLN2), a member of the pfkB-carbohydrate kinase family. FLN1 and FLN2 are potential plastidial thioredoxin z (TRX z) targets.; fructokinase-like 1 (FLN1); FUNCTIONS IN: kinase activity; INVOLVED IN: acetate fermentation, sucrose biosynthetic process, sucrose catabolic process, using beta-fructofuranosidase; LOCATED…	0.758582
2.2.1.5	major CHO metabolism.degradation.sucrose.Susy	medtr2g044070.1	Transcript	(ipr000368 : 1500.0) Sucrose synthase & (p13708|susy_soybn : 1463.0) Sucrose synthase (EC 2.4.1.13) (Sucrose-UDP glucosyltransferase) (Nodulin-100) - Glycine max (Soybean) & (at3g43190 : 1364.0) Encodes a protein with sucrose synthase activity (SUS4).; sucrose synthase 4 (SUS4); FUNCTIONS IN: UDP-glycosyltransferase activity, sucrose synthase activity, transferase activity, transferring glycosyl …	0.861262
2.2.1.5	major CHO metabolism.degradation.sucrose.Susy	medtr4g124660.1	Transcript	(o65026|susy_medsa : 1596.0) Sucrose synthase (EC 2.4.1.13) (Sucrose-UDP glucosyltransferase) - Medicago sativa (Alfalfa) & (ipr000368 : 1500.0) Sucrose synthase & (at3g43190 : 1362.0) Encodes a protein with sucrose synthase activity (SUS4).; sucrose synthase 4 (SUS4); FUNCTIONS IN: UDP-glycosyltransferase activity, sucrose synthase activity, transferase activity, transferring glycosyl groups; IN…	0.740337
Minor carbohydrate metabolism
3.1.2.2	minor CHO metabolism.raffinose family.raffinose synthases.putative	medtr7g091880.1	Transcript	(ipr008811 : 1500.0) Raffinose synthase & (at3g57520 : 1266.0) seed imbibition 2 (SIP2); CONTAINS InterPro DOMAIN/s: Glycoside hydrolase, catalytic core (InterPro:IPR017853), Raffinose synthase (InterPro:IPR008811); BEST Arabidopsis thaliana protein match is: seed imbibition 1 (TAIR:AT1G55740.1); Has 35333 Blast hits to 34131 proteins in 2444 species: Archae - 798; Bacteria - 22429; Metazoa - 974…	1.28638
3.2.1	minor CHO metabolism.trehalose.TPS	medtr0034s0170.1	Transcript	(at1g78580 : 1402.0) Encodes an enzyme putatively involved in trehalose biosynthesis. The protein has a trehalose synthase (TPS)-like domain but no trehalose phosphatase (TPP)-like domain. ATTPS1 is able to complement yeast tps1 mutants in vivo. The gene product modulates cell growth but not cell differentiation by determining cell wall deposition and cell division.; trehalose-6-phosphate synthas…	-0.997178
3.4.1	minor CHO metabolism.myo-inositol.poly-phosphatases	medtr4g098850.1	Transcript	(at4g18010 : 558.0) Encodes an inositol polyphosphate 5-phosphatase that appears to have Type I activity. It can dephosphorylate IP3(inositol(1,4,5)P3) and IP4 (inositol(1,3,4,5)P4), but it does not appear to be active against phosphatidylinositol 4,5 bisphosphate. Overexpression of this gene renders plants insensitive to ABA in germination and growth assays.; INOSITOL(1,4,5)P3 5-PHOSPHATASE II (…	-0.773941
3.5	minor CHO metabolism.others	medtr1g069325.1	Transcript	(at4g28706 : 465.0) pfkB-like carbohydrate kinase family protein; FUNCTIONS IN: kinase activity, ribokinase activity; INVOLVED IN: D-ribose metabolic process; EXPRESSED IN: 21 plant structures; EXPRESSED DURING: 13 growth stages; CONTAINS InterPro DOMAIN/s: Carbohydrate/purine kinase (InterPro:IPR011611), Ribokinase (InterPro:IPR002139), Carbohydrate/puine kinase, PfkB, conserved site (InterPro:I…	-1.84909
3.5	minor CHO metabolism.others	medtr5g009670.1	Transcript	(at4g23730 : 468.0) Galactose mutarotase-like superfamily protein; FUNCTIONS IN: isomerase activity, carbohydrate binding, aldose 1-epimerase activity, catalytic activity; INVOLVED IN: galactose metabolic process, carbohydrate metabolic process; LOCATED IN: cellular_component unknown; EXPRESSED IN: 25 plant structures; EXPRESSED DURING: 14 growth stages; CONTAINS InterPro DOMAIN/s: Glycoside hydr…	-1.477
3.5	minor CHO metabolism.others	medtr6g011550.1	Transcript	(gnl|cdd|36817 : 365.0) no description available & (at3g47800 : 357.0) Galactose mutarotase-like superfamily protein; FUNCTIONS IN: aldose 1-epimerase activity; INVOLVED IN: galactose metabolic process, hexose metabolic process, carbohydrate metabolic process; LOCATED IN: endomembrane system; EXPRESSED IN: 23 plant structures; EXPRESSED DURING: 14 growth stages; CONTAINS InterPro DOMAIN/s: Glycos…	-1.78431
3.5	minor CHO metabolism.others	medtr7g099270.1	Transcript	(at4g28706 : 459.0) pfkB-like carbohydrate kinase family protein; FUNCTIONS IN: kinase activity, ribokinase activity; INVOLVED IN: D-ribose metabolic process; EXPRESSED IN: 21 plant structures; EXPRESSED DURING: 13 growth stages; CONTAINS InterPro DOMAIN/s: Carbohydrate/purine kinase (InterPro:IPR011611), Ribokinase (InterPro:IPR002139), Carbohydrate/puine kinase, PfkB, conserved site (InterPro:I…	1.35209
3.5	minor CHO metabolism.others	medtr7g116910.1	Transcript	(at3g61610 : 491.0) Galactose mutarotase-like superfamily protein; FUNCTIONS IN: carbohydrate binding, isomerase activity, aldose 1-epimerase activity, catalytic activity; INVOLVED IN: galactose metabolic process, N-terminal protein myristoylation, carbohydrate metabolic process; LOCATED IN: cellular_component unknown; EXPRESSED IN: 17 plant structures; EXPRESSED DURING: 11 growth stages; CONTAIN…	1.89982
Lipid metabolism
11.3	lipid metabolism.Phospholipid synthesis	medtr5g061520.1	Transcript	(at4g01950 : 455.0) Encodes a member of a family of proteins with glycerol-3-phosphate acyltransferase activity.; glycerol-3-phosphate acyltransferase 3 (GPAT3); FUNCTIONS IN: acyltransferase activity; INVOLVED IN: metabolic process; EXPRESSED IN: 14 plant structures; EXPRESSED DURING: 9 growth stages; CONTAINS InterPro DOMAIN/s: Phospholipid/glycerol acyltransferase (InterPro:IPR002123); BEST Ar…	2.94193
11.3	lipid metabolism.Phospholipid synthesis	medtr7g067380.1	Transcript	(at2g38110 : 770.0) Encodes a protein with glycerol-3-phosphate acyltransferase activity.; glycerol-3-phosphate acyltransferase 6 (GPAT6); CONTAINS InterPro DOMAIN/s: Phospholipid/glycerol acyltransferase (InterPro:IPR002123); BEST Arabidopsis thaliana protein match is: glycerol-3-phosphate acyltransferase 8 (TAIR:AT4G00400.1); Has 444 Blast hits to 431 proteins in 52 species: Archae - 0; Bacteri…	-1.73252
11.3.2	lipid metabolism.Phospholipid synthesis.choline kinase	medtr6g040230.1	Transcript	(at1g74320 : 327.0) encodes a choline kinase, whose expression is induced by high salt and mannitol.; Protein kinase superfamily protein; CONTAINS InterPro DOMAIN/s: Choline/ethanolamine kinase (InterPro:IPR002573), Protein kinase-like domain (InterPro:IPR011009); BEST Arabidopsis thaliana protein match is: Protein kinase superfamily protein (TAIR:AT4G09760.1); Has 1486 Blast hits to 1432 protein…	-2.14848
11.3.5	lipid metabolism.Phospholipid synthesis.diacylglycerol kinase	medtr4g045973.1	Transcript	(at2g20900 : 769.0) diacylglycerol kinase 5 (DGK5); FUNCTIONS IN: diacylglycerol kinase activity; INVOLVED IN: activation of protein kinase C activity by G-protein coupled receptor protein signaling pathway; LOCATED IN: cellular_component unknown; EXPRESSED IN: 25 plant structures; EXPRESSED DURING: 15 growth stages; CONTAINS InterPro DOMAIN/s: Diacylglycerol kinase, catalytic domain (InterPro:IP…	-0.899919
11.8	lipid metabolism.'exotics'(steroids, squalene etc)	medtr2g081810.1	Transcript	(at5g54500 : 315.0) Encodes a flavin mononucleotide-binding flavodoxin-like quinone reductase that is a primary auxin-response gene.; flavodoxin-like quinone reductase 1 (FQR1); CONTAINS InterPro DOMAIN/s: NADPH-dependent FMN reductase (InterPro:IPR005025), Flavoprotein WrbA (InterPro:IPR010089), Flavodoxin/nitric oxide synthase (InterPro:IPR008254); BEST Arabidopsis thaliana protein match is: Qu…	-0.714076
11.8	lipid metabolism.'exotics'(steroids, squalene etc)	medtr3g013500.1	Transcript	(at5g07010 : 410.0) Encodes a sulfotransferase that acts specifically on 11- and 12-hydroxyjasmonic acid. Transcript levels for this enzyme are increased by treatments with jasmonic acid (JA), 12-hydroxyJA, JA-isoleucine, and 12-oxyphytodienoic acid (a JA precursor).; sulfotransferase 2A (ST2A); CONTAINS InterPro DOMAIN/s: Sulfotransferase domain (InterPro:IPR000863); BEST Arabidopsis thaliana pr…	-1.79517
11.8.1	lipid metabolism.'exotics' (steroids, squalene etc).sphingolipids	medtr8g056100.1	Transcript	(at2g46210 : 652.0) Fatty acid/sphingolipid desaturase; FUNCTIONS IN: oxidoreductase activity, oxidoreductase activity, acting on paired donors, with oxidation of a pair of donors resulting in the reduction of molecular oxygen to two molecules of water, iron ion binding, heme binding; INVOLVED IN: oxidation reduction, fatty acid biosynthetic process, lipid metabolic process; EXPRESSED IN: 23 plan…	-0.641888
11.8.1.3	lipid metabolism.''exotics'' (steroids, squalene etc).sphingolipids.ceramide glucosyltransferase	medtr8g102500.1	Transcript	(at2g19880 : 835.0) Nucleotide-diphospho-sugar transferases superfamily protein; FUNCTIONS IN: ceramide glucosyltransferase activity; INVOLVED IN: biological_process unknown; LOCATED IN: endomembrane system; EXPRESSED IN: 24 plant structures; EXPRESSED DURING: 15 growth stages; CONTAINS InterPro DOMAIN/s: Glycosyl transferase, family 2 (InterPro:IPR001173). & (gnl|cdd|37758 : 295.0) no descriptio…	1.04341
11.4	lipid metabolism.TAG synthesis	medtr4g111770.1	Transcript	(at3g18570 : 107.0) Oleosin family protein; FUNCTIONS IN: molecular_function unknown; INVOLVED IN: lipid storage; LOCATED IN: monolayer-surrounded lipid storage body, integral to membrane, membrane; EXPRESSED IN: petal, leaf whorl, male gametophyte, flower; EXPRESSED DURING: L mature pollen stage, M germinated pollen stage, 4 anthesis, petal differentiation and expansion stage; CONTAINS InterPro …	2.29098
11.2.4	lipid metabolism.FA desaturation.omega 6 desaturase	medtr1g111880.1	Transcript	(p48630|fd6e1_soybn : 560.0) Omega-6 fatty acid desaturase, endoplasmic reticulum isozyme 1 (EC 1.14.19.-) - Glycine max (Soybean) & (at3g12120 : 474.0) Major enzyme responsible for the synthesis of 18:2 fatty acids in the endoplasmic reticulum. Contains His-rich motifs, which contribute to the interaction with the electron donor cytochrome b5. Mutations in this gene suppress the low temperature-…	4.12472
11.1.3	lipid metabolism.FA synthesis and FA elongation.ketoacyl ACP synthase	medtr4g096690.1	Transcript	(at5g46290 : 760.0) 3-ketoacyl-acyl carrier protein synthase I (KAS I) mRNA,; 3-ketoacyl-acyl carrier protein synthase I (KAS I); FUNCTIONS IN: transferase activity, transferring acyl groups other than amino-acyl groups, fatty acid synthase activity, catalytic activity; INVOLVED IN: biosynthetic process, metabolic process, fatty acid biosynthetic process; EXPRESSED IN: 23 plant structures; EXPRES…	1.83124
11.1.8	lipid metabolism.FA synthesis and FA elongation.acyl coa ligase	medtr3g084450.1	Transcript	(at3g23790 : 954.0) acyl activating enzyme 16 (AAE16); FUNCTIONS IN: catalytic activity; INVOLVED IN: metabolic process; LOCATED IN: chloroplast envelope; EXPRESSED IN: 21 plant structures; EXPRESSED DURING: 9 growth stages; CONTAINS InterPro DOMAIN/s: AMP-binding (InterPro:IPR020459), AMP-binding, conserved site (InterPro:IPR020845), AMP-dependent synthetase/ligase (InterPro:IPR000873); BEST Ara…	-1.18767
11.1.9	lipid metabolism.FA synthesis and FA elongation.long chain fatty acid CoA ligase	medtr1g086600.1	Transcript	(at2g47240 : 932.0) Encodes an acyl-CoA synthetase that acts on long-chain and very-long-chain fatty acids, involved in cuticular wax and cutin biosynthesis; LONG-CHAIN ACYL-COA SYNTHASE 1 (LACS1); FUNCTIONS IN: long-chain fatty acid-CoA ligase activity, very long-chain fatty acid-CoA ligase activity; INVOLVED IN: fatty acid biosynthetic process, cutin biosynthetic process, wax biosynthetic proce…	0.797423
11.1.9	lipid metabolism.FA synthesis and FA elongation.long chain fatty acid CoA ligase	medtr5g009360.1	Transcript	(at4g23850 : 1060.0) long-chain acyl-CoA synthetase 4 (LACS4); FUNCTIONS IN: catalytic activity; INVOLVED IN: fatty acid biosynthetic process; LOCATED IN: plasma membrane; EXPRESSED IN: 26 plant structures; EXPRESSED DURING: 13 growth stages; CONTAINS InterPro DOMAIN/s: AMP-binding, conserved site (InterPro:IPR020845), AMP-dependent synthetase/ligase (InterPro:IPR000873); BEST Arabidopsis thalian…	-0.560098
11.1.9	lipid metabolism.FA synthesis and FA elongation.long chain fatty acid CoA ligase	medtr8g099420.1	Transcript	(at4g23850 : 985.0) long-chain acyl-CoA synthetase 4 (LACS4); FUNCTIONS IN: catalytic activity; INVOLVED IN: fatty acid biosynthetic process; LOCATED IN: plasma membrane; EXPRESSED IN: 26 plant structures; EXPRESSED DURING: 13 growth stages; CONTAINS InterPro DOMAIN/s: AMP-binding, conserved site (InterPro:IPR020845), AMP-dependent synthetase/ligase (InterPro:IPR000873); BEST Arabidopsis thaliana…	2.88369
11.1.10	lipid metabolism.FA synthesis and FA elongation.beta ketoacyl CoA synthase	medtr1g076430.1	Transcript	(at1g04220 : 823.0) Encodes KCS2, a member of the 3-ketoacyl-CoA synthase family involved in the biosynthesis of VLCFA (very long chain fatty acids).; 3-ketoacyl-CoA synthase 2 (KCS2); FUNCTIONS IN: fatty acid elongase activity; INVOLVED IN: response to wounding, response to osmotic stress, suberin biosynthetic process; LOCATED IN: membrane; EXPRESSED IN: 17 plant structures; EXPRESSED DURING: 6 …	-0.699672
11.1.12	lipid metabolism.FA synthesis and FA elongation.ACP protein	medtr2g020360.1	Transcript	(p08817|acp2_horvu : 101.0) Acyl carrier protein 2, chloroplast precursor (Acyl carrier protein II) (ACP II) - Hordeum vulgare (Barley) & (gnl|cdd|36959 : 99.0) no description available & (at4g25050 : 83.6) encodes an acyl carrier protein predominantly expressed in leaves. Gene expression is upregulated by light.; acyl carrier protein 4 (ACP4); CONTAINS InterPro DOMAIN/s: Acyl carrier protein-lik…	0.860214
11.1.31	lipid metabolism.FA synthesis and FA elongation.pyruvate DH	medtr4g121880.1	Transcript	(at3g16950 : 863.0) encodes a plastid lipoamide dehydrogenase, subunit of the pyruvate dehydrogenase complex which provides acetyl-CoA for de novo fatty acid biosynthesis. The gene is highly expressed in developing seeds.; lipoamide dehydrogenase 1 (LPD1); CONTAINS InterPro DOMAIN/s: FAD-dependent pyridine nucleotide-disulphide oxidoreductase (InterPro:IPR013027), Pyridine nucleotide-disulphide o…	0.979187
11.9.4.5	lipid metabolism.lipid degradation.beta-oxidation.acyl-CoA thioesterase	medtr4g086470.1	Transcript	(at3g48690 : 286.0) Encodes a protein with carboxylesterase whose activity was tested using both pNA and 2,4-D-methyl.; CXE12; FUNCTIONS IN: carboxylesterase activity; INVOLVED IN: response to salt stress; LOCATED IN: cytoplasm; EXPRESSED IN: 24 plant structures; EXPRESSED DURING: 14 growth stages; CONTAINS InterPro DOMAIN/s: Lipase, GDXG, active site (InterPro:IPR002168), Alpha/beta hydrolase fo…	-1.53315
11.9.3.1	lipid metabolism.lipid degradation.lysophospholipases.phospholipase D	medtr5g023050.1	Transcript	(at4g35790 : 1206.0) Encodes a protein with phospholipase D activity. Involved in phospolipase metabolism. Mutants are affected in hydrogen peroxide mediated cell death.; ARABIDOPSIS THALIANA PHOSPHOLIPASE D DELTA (ATPLDDELTA); FUNCTIONS IN: phospholipase D activity; INVOLVED IN: response to water deprivation, response to cold, hyperosmotic salinity response, phosphatidic acid metabolic process, …	1.11823
11.9.3.2	lipid metabolism.lipid degradation.lysophospholipases.carboxylesterase	medtr2g103140.1	Transcript	(at1g52700 : 360.0) alpha/beta-Hydrolases superfamily protein; FUNCTIONS IN: hydrolase activity, carboxylesterase activity; INVOLVED IN: biological_process unknown; EXPRESSED IN: 11 plant structures; EXPRESSED DURING: 7 growth stages; CONTAINS InterPro DOMAIN/s: Phospholipase/carboxylesterase (InterPro:IPR003140); BEST Arabidopsis thaliana protein match is: alpha/beta-Hydrolases superfamily prote…	3.90478
11.9.3.2	lipid metabolism.lipid degradation.lysophospholipases.carboxylesterase	medtr3g107630.1	Transcript	(at5g20060 : 342.0) alpha/beta-Hydrolases superfamily protein; FUNCTIONS IN: hydrolase activity, carboxylesterase activity; INVOLVED IN: biological_process unknown; LOCATED IN: cellular_component unknown; EXPRESSED IN: 23 plant structures; EXPRESSED DURING: 15 growth stages; CONTAINS InterPro DOMAIN/s: Phospholipase/carboxylesterase (InterPro:IPR003140); BEST Arabidopsis thaliana protein match is…	2.58485
11.9.3.2	lipid metabolism.lipid degradation.lysophospholipases.carboxylesterase	medtr4g086470.1	Transcript	(at3g48690 : 286.0) Encodes a protein with carboxylesterase whose activity was tested using both pNA and 2,4-D-methyl.; CXE12; FUNCTIONS IN: carboxylesterase activity; INVOLVED IN: response to salt stress; LOCATED IN: cytoplasm; EXPRESSED IN: 24 plant structures; EXPRESSED DURING: 14 growth stages; CONTAINS InterPro DOMAIN/s: Lipase, GDXG, active site (InterPro:IPR002168), Alpha/beta hydrolase fo…	-1.53315
11.9.3.3	lipid metabolism.lipid degradation.lysophospholipases.glycerophosphodiester phosphodiesterase	medtr1g026990.1	Transcript	(at4g18250 : 314.0) receptor serine/threonine kinase, putative; FUNCTIONS IN: transmembrane receptor protein serine/threonine kinase activity, kinase activity; INVOLVED IN: protein amino acid phosphorylation; EXPRESSED IN: 8 plant structures; EXPRESSED DURING: LP.06 six leaves visible, LP.04 four leaves visible, LP.10 ten leaves visible, LP.02 two leaves visible, LP.08 eight leaves visible; CONTA…	-2.14238
11.9.3.3	lipid metabolism.lipid degradation.lysophospholipases.glycerophosphodiester phosphodiesterase	medtr1g108910.1	Transcript	(at1g67000 : 293.0) Protein kinase superfamily protein; FUNCTIONS IN: protein serine/threonine kinase activity, protein kinase activity, kinase activity, ATP binding; INVOLVED IN: protein amino acid phosphorylation; LOCATED IN: endomembrane system; EXPRESSED IN: stem; CONTAINS InterPro DOMAIN/s: Protein kinase, ATP binding site (InterPro:IPR017441), Protein kinase, catalytic domain (InterPro:IPR0…	-1.80668
11.9.3.3	lipid metabolism.lipid degradation.lysophospholipases.glycerophosphodiester phosphodiesterase	medtr1g110140.1	Transcript	(at1g67000 : 389.0) Protein kinase superfamily protein; FUNCTIONS IN: protein serine/threonine kinase activity, protein kinase activity, kinase activity, ATP binding; INVOLVED IN: protein amino acid phosphorylation; LOCATED IN: endomembrane system; EXPRESSED IN: stem; CONTAINS InterPro DOMAIN/s: Protein kinase, ATP binding site (InterPro:IPR017441), Protein kinase, catalytic domain (InterPro:IPR0…	-2.42915
11.9.3.3	lipid metabolism.lipid degradation.lysophospholipases.glycerophosphodiester phosphodiesterase	medtr1g110220.1	Transcript	(at1g70250 : 323.0) Encodes a Protease inhibitor/seed storage/LTP family protein; receptor serine/threonine kinase, putative; FUNCTIONS IN: protein serine/threonine kinase activity, transmembrane receptor protein serine/threonine kinase activity, protein kinase activity, ATP binding; INVOLVED IN: protein amino acid phosphorylation; LOCATED IN: endomembrane system; EXPRESSED IN: 20 plant structure…	-2.07823
11.9.3.3	lipid metabolism.lipid degradation.lysophospholipases.glycerophosphodiester phosphodiesterase	medtr3g028630.1	Transcript	(at5g38280 : 342.0) putative receptor serine/threonine kinase PR5K (PR5K) mRNA, PR5-like receptor kinase; PR5-like receptor kinase (PR5K); FUNCTIONS IN: transmembrane receptor protein serine/threonine kinase activity, kinase activity; INVOLVED IN: response to fungus; LOCATED IN: endomembrane system; EXPRESSED IN: 6 plant structures; EXPRESSED DURING: petal differentiation and expansion stage; CON…	-1.51315
11.9.3.3	lipid metabolism.lipid degradation.lysophospholipases.glycerophosphodiester phosphodiesterase	medtr6g082950.1	Transcript	(at1g66980 : 386.0) Encodes SNC4 (suppressor of npr1-1, constitutive 4), an atypical receptor-like kinase with two predicted extracellular glycerophosphoryl diester phosphodiesterase domains.; suppressor of npr1-1 constitutive 4 (SNC4); CONTAINS InterPro DOMAIN/s: Protein kinase, ATP binding site (InterPro:IPR017441), Serine/threonine-protein kinase domain (InterPro:IPR002290), Serine-threonine/t…	-1.89822
11.9.3.3	lipid metabolism.lipid degradation.lysophospholipases.glycerophosphodiester phosphodiesterase	medtr6g083780.1	Transcript	(at1g66920 : 417.0) Protein kinase superfamily protein; FUNCTIONS IN: protein serine/threonine kinase activity, protein kinase activity, kinase activity, ATP binding; INVOLVED IN: protein amino acid phosphorylation; LOCATED IN: endomembrane system; CONTAINS InterPro DOMAIN/s: Protein kinase, ATP binding site (InterPro:IPR017441), Serine/threonine-protein kinase domain (InterPro:IPR002290), Serine…	-2.17433
11.9.3.3	lipid metabolism.lipid degradation.lysophospholipases.glycerophosphodiester phosphodiesterase	medtr6g083740.1	Transcript	(at1g66910 : 254.0) Protein kinase superfamily protein; FUNCTIONS IN: kinase activity; INVOLVED IN: protein amino acid phosphorylation; LOCATED IN: endomembrane system; CONTAINS InterPro DOMAIN/s: Protein kinase, ATP binding site (InterPro:IPR017441), Serine/threonine-protein kinase domain (InterPro:IPR002290), Serine-threonine/tyrosine-protein kinase (InterPro:IPR001245), Serine/threonine-protei…	-1.39485
11.9.2	lipid metabolism.lipid degradation.lipases	medtr4g080100.1	Transcript	(at2g42690 : 487.0) alpha/beta-Hydrolases superfamily protein; FUNCTIONS IN: triglyceride lipase activity; INVOLVED IN: lipid metabolic process; LOCATED IN: chloroplast; EXPRESSED IN: 22 plant structures; EXPRESSED DURING: 13 growth stages; CONTAINS InterPro DOMAIN/s: Lipase, class 3 (InterPro:IPR002921); BEST Arabidopsis thaliana protein match is: alpha/beta-Hydrolases superfamily protein (TAIR:…	-1.29053
11.9.2	lipid metabolism.lipid degradation.lipases	medtr6g085070.1	Transcript	(at1g73920 : 867.0) alpha/beta-Hydrolases superfamily protein; FUNCTIONS IN: lipase activity; INVOLVED IN: lipid metabolic process; LOCATED IN: cellular_component unknown; EXPRESSED IN: 24 plant structures; EXPRESSED DURING: 15 growth stages; CONTAINS InterPro DOMAIN/s: AB-hydrolase-associated lipase region (InterPro:IPR006693); BEST Arabidopsis thaliana protein match is: alpha/beta-Hydrolases su…	1.26252
11.9.2.1	lipid metabolism.lipid degradation.lipases.triacylglycerol lipase	medtr6g085070.1	Transcript	(at1g73920 : 867.0) alpha/beta-Hydrolases superfamily protein; FUNCTIONS IN: lipase activity; INVOLVED IN: lipid metabolic process; LOCATED IN: cellular_component unknown; EXPRESSED IN: 24 plant structures; EXPRESSED DURING: 15 growth stages; CONTAINS InterPro DOMAIN/s: AB-hydrolase-associated lipase region (InterPro:IPR006693); BEST Arabidopsis thaliana protein match is: alpha/beta-Hydrolases su…	1.26252
11.9.2.1	lipid metabolism.lipid degradation.lipases.triacylglycerol lipase	medtr7g117505.1	Transcript	(at3g14360 : 568.0) alpha/beta-Hydrolases superfamily protein; FUNCTIONS IN: triglyceride lipase activity; INVOLVED IN: lipid metabolic process; LOCATED IN: cellular_component unknown; EXPRESSED IN: 23 plant structures; EXPRESSED DURING: 12 growth stages; CONTAINS InterPro DOMAIN/s: Lipase, class 3 (InterPro:IPR002921); BEST Arabidopsis thaliana protein match is: alpha/beta-Hydrolases superfamily…	1.25132
Wax biosynthesis
16.7	secondary metabolism.wax	medtr4g070270.1	Transcript	(at1g19440 : 892.0) Encodes KCS4, a member of the 3-ketoacyl-CoA synthase family involved in the biosynthesis of VLCFA (very long chain fatty acids).; 3-ketoacyl-CoA synthase 4 (KCS4); FUNCTIONS IN: transferase activity, transferring acyl groups other than amino-acyl groups, catalytic activity; INVOLVED IN: very long-chain fatty acid metabolic process, cuticle development; LOCATED IN: membrane; E…	1.0775
16.7	secondary metabolism.wax	medtr8g009560.1	Transcript	(at1g02205 : 743.0) Expression of the CER1 gene associated with production of stem epicuticular wax and pollen fertility. Biochemical studies showed that cer1 mutants are blocked in the conversion of stem wax C30 aldehydes to C29 alkanes, and they also lack the secondary alcohols and ketones. These suggested the CER1 protein is an aldehyde decarbonylase, but the exact molecular function of this p…	3.13361
Terpenes, Flavonoids, Phenylpropanoids and Phenolics
16.1	secondary metabolism.isoprenoids	medtr7g034535.1	Transcript	(gnl|cdd|35718 : 1270.0) no description available & (at1g78955 : 1183.0) camelliol C synthase 1 (CAMS1); CONTAINS InterPro DOMAIN/s: Terpenoid cylases/protein prenyltransferase alpha-alpha toroid (InterPro:IPR008930), Squalene cyclase (InterPro:IPR018333), Prenyltransferase/squalene oxidase (InterPro:IPR001330); BEST Arabidopsis thaliana protein match is: Terpenoid cyclases family protein (TAIR:A…	-2.66715
16.1.5	secondary metabolism.isoprenoids.terpenoids	medtr7g010710.1	Transcript	(gnl|cdd|29478 : 478.0) no description available & (at4g16740 : 363.0) Encodes an (E,E)-alpha-farnesene synthase in the Col ecotype of Arabidopsis. This enzyme can also catalyze the formation of (E)-beta-ocimene as well as trace amounts of myrcene and other related compounds in vitro. The cytosolic localization of the protein may make it favor (E,E)-alpha-farnesene biosynthesis because the precur…	-3.36968
16.1.5	secondary metabolism.isoprenoids.terpenoids	medtr7g034535.1	Transcript	(gnl|cdd|35718 : 1270.0) no description available & (at1g78955 : 1183.0) camelliol C synthase 1 (CAMS1); CONTAINS InterPro DOMAIN/s: Terpenoid cylases/protein prenyltransferase alpha-alpha toroid (InterPro:IPR008930), Squalene cyclase (InterPro:IPR018333), Prenyltransferase/squalene oxidase (InterPro:IPR001330); BEST Arabidopsis thaliana protein match is: Terpenoid cyclases family protein (TAIR:A…	-2.66715
16.8.1	secondary metabolism.flavonoids.anthocyanins	medtr3g040410.1	Transcript	(gnl|cdd|35365 : 212.0) no description available & (gnl|cdd|33294 : 179.0) no description available & (at3g11180 : 137.0) 2-oxoglutarate (2OG) and Fe(II)-dependent oxygenase superfamily protein; FUNCTIONS IN: oxidoreductase activity, iron ion binding; INVOLVED IN: oxidation reduction; LOCATED IN: cellular_component unknown; EXPRESSED IN: inflorescence meristem, male gametophyte, flower, pollen tu…	-1.0728
16.8.1	secondary metabolism.flavonoids.anthocyanins	medtr4g015180.1	Transcript	(at5g01210 : 578.0) HXXXD-type acyl-transferase family protein; FUNCTIONS IN: transferase activity, transferring acyl groups other than amino-acyl groups, transferase activity; INVOLVED IN: biological_process unknown; LOCATED IN: cellular_component unknown; EXPRESSED IN: 22 plant structures; EXPRESSED DURING: 13 growth stages; CONTAINS InterPro DOMAIN/s: Transferase (InterPro:IPR003480); BEST Ara…	-1.72359
16.8.1	secondary metabolism.flavonoids.anthocyanins	medtr7g067120.1	Transcript	(at2g22590 : 359.0) UDP-Glycosyltransferase superfamily protein; FUNCTIONS IN: transferase activity, transferring glycosyl groups; INVOLVED IN: metabolic process; LOCATED IN: cellular_component unknown; CONTAINS InterPro DOMAIN/s: UDP-glucuronosyl/UDP-glucosyltransferase (InterPro:IPR002213); BEST Arabidopsis thaliana protein match is: UDP-Glycosyltransferase superfamily protein (TAIR:AT5G65550.1…	-0.99353
16.8.1.12	secondary metabolism.flavonoids.anthocyanins.anthocyanidin 3-O-glucosyltransferase	medtr7g067120.1	Transcript	(at2g22590 : 359.0) UDP-Glycosyltransferase superfamily protein; FUNCTIONS IN: transferase activity, transferring glycosyl groups; INVOLVED IN: metabolic process; LOCATED IN: cellular_component unknown; CONTAINS InterPro DOMAIN/s: UDP-glucuronosyl/UDP-glucosyltransferase (InterPro:IPR002213); BEST Arabidopsis thaliana protein match is: UDP-Glycosyltransferase superfamily protein (TAIR:AT5G65550.1…	-0.99353
16.8.2	secondary metabolism.flavonoids.chalcones	medtr4g072320.1	Transcript	(q7g765|nado2_orysa : 341.0) Probable NAD(P)H-dependent oxidoreductase 2 (EC 1.-.-.-) - Oryza sativa (Rice) & (at1g59960 : 333.0) NAD(P)-linked oxidoreductase superfamily protein; FUNCTIONS IN: oxidoreductase activity; INVOLVED IN: response to salt stress; EXPRESSED IN: 21 plant structures; EXPRESSED DURING: 13 growth stages; CONTAINS InterPro DOMAIN/s: Aldo/keto reductase (InterPro:IPR001395), A…	-0.975653
16.8.2.1	secondary metabolism.flavonoids.chalcones.naringenin-chalcone synthase	medtr3g083920.1	Transcript	(p51081|chsa_pea : 781.0) Chalcone synthase 1A (EC 2.3.1.74) (Naringenin-chalcone synthase 1A) - Pisum sativum (Garden pea) & (at5g13930 : 681.0) Encodes chalcone synthase (CHS), a key enzyme involved in the biosynthesis of flavonoids. Required for the accumulation of purple anthocyanins in leaves and stems. Also involved in the regulation of auxin transport and the modulation of root gravitropis…	-1.72558
16.8.3	secondary metabolism.flavonoids.dihydroflavonols	medtr3g040410.1	Transcript	(gnl|cdd|35365 : 212.0) no description available & (gnl|cdd|33294 : 179.0) no description available & (at3g11180 : 137.0) 2-oxoglutarate (2OG) and Fe(II)-dependent oxygenase superfamily protein; FUNCTIONS IN: oxidoreductase activity, iron ion binding; INVOLVED IN: oxidation reduction; LOCATED IN: cellular_component unknown; EXPRESSED IN: inflorescence meristem, male gametophyte, flower, pollen tu…	-1.0728
16.8.3	secondary metabolism.flavonoids.dihydroflavonols	medtr3g092890.1	Transcript	(at5g24530 : 496.0) Encodes a putative 2OG-Fe(II) oxygenase that is defense-associated but required for susceptibility to downy mildew.; DOWNY MILDEW RESISTANT 6 (DMR6); FUNCTIONS IN: oxidoreductase activity, acting on paired donors, with incorporation or reduction of molecular oxygen, 2-oxoglutarate as one donor, and incorporation of one atom each of oxygen into both donors, oxidoreductase activ…	-2.56356
16.8.3	secondary metabolism.flavonoids.dihydroflavonols	medtr5g070090.1	Transcript	(at2g29730 : 420.0) UDP-glucosyl transferase 71D1 (UGT71D1); FUNCTIONS IN: quercetin 3-O-glucosyltransferase activity, UDP-glycosyltransferase activity, transferase activity, transferring glycosyl groups; INVOLVED IN: metabolic process; LOCATED IN: cellular_component unknown; CONTAINS InterPro DOMAIN/s: UDP-glucuronosyl/UDP-glucosyltransferase (InterPro:IPR002213); BEST Arabidopsis thaliana prote…	-1.48106
16.8.3	secondary metabolism.flavonoids.dihydroflavonols	medtr7g047030.1	Transcript	(at4g01070 : 439.0) the glycosyltransferase (UGT72B1) is involved in metabolizing xenobiotica (chloroaniline and chlorophenole). Comparison between wild type and knock-out mutant demonstrates the central role of this gene for metabolizing chloroaniline but significantly less for chlorophenole. The glucosyltransferase preferred UDP-xylose over UDP-glucose indicating its (additional) functioning as…	-1.82467
16.8.3	secondary metabolism.flavonoids.dihydroflavonols	medtr7g047270.1	Transcript	(at4g01070 : 439.0) the glycosyltransferase (UGT72B1) is involved in metabolizing xenobiotica (chloroaniline and chlorophenole). Comparison between wild type and knock-out mutant demonstrates the central role of this gene for metabolizing chloroaniline but significantly less for chlorophenole. The glucosyltransferase preferred UDP-xylose over UDP-glucose indicating its (additional) functioning as…	-1.9337
16.8.3	secondary metabolism.flavonoids.dihydroflavonols	medtr7g062550.1	Transcript	(gnl|cdd|35365 : 285.0) no description available & (at3g21420 : 281.0) 2-oxoglutarate (2OG) and Fe(II)-dependent oxygenase superfamily protein; FUNCTIONS IN: oxidoreductase activity; INVOLVED IN: metabolic process; LOCATED IN: cellular_component unknown; EXPRESSED IN: 16 plant structures; EXPRESSED DURING: 8 growth stages; CONTAINS InterPro DOMAIN/s: Oxoglutarate/iron-dependent oxygenase (InterPr…	-2.41616
16.8.3	secondary metabolism.flavonoids.dihydroflavonols	medtr8g006710.1	Transcript	(at1g01420 : 383.0) UDP-glucosyl transferase 72B3 (UGT72B3); FUNCTIONS IN: quercetin 3-O-glucosyltransferase activity, UDP-glycosyltransferase activity, transferase activity, transferring glycosyl groups; INVOLVED IN: metabolic process; LOCATED IN: cellular_component unknown; EXPRESSED IN: 11 plant structures; EXPRESSED DURING: LP.04 four leaves visible, petal differentiation and expansion stage;…	-1.32226
16.8.3	secondary metabolism.flavonoids.dihydroflavonols	medtr8g006730.1	Transcript	(at1g01420 : 384.0) UDP-glucosyl transferase 72B3 (UGT72B3); FUNCTIONS IN: quercetin 3-O-glucosyltransferase activity, UDP-glycosyltransferase activity, transferase activity, transferring glycosyl groups; INVOLVED IN: metabolic process; LOCATED IN: cellular_component unknown; EXPRESSED IN: 11 plant structures; EXPRESSED DURING: LP.04 four leaves visible, petal differentiation and expansion stage;…	-1.7626
16.8.3	secondary metabolism.flavonoids.dihydroflavonols	medtr0009s0480.1	Transcript	(at1g17020 : 375.0) Encodes a novel member of the Fe(II)/ascorbate oxidase gene family; senescence-related gene.; senescence-related gene 1 (SRG1); CONTAINS InterPro DOMAIN/s: Oxoglutarate/iron-dependent oxygenase (InterPro:IPR005123); BEST Arabidopsis thaliana protein match is: 2-oxoglutarate (2OG) and Fe(II)-dependent oxygenase superfamily protein (TAIR:AT1G17010.1); Has 8560 Blast hits to 8517…	0.782101
16.8.3	secondary metabolism.flavonoids.dihydroflavonols	medtr0078s0010.1	Transcript	(at4g01070 : 444.0) the glycosyltransferase (UGT72B1) is involved in metabolizing xenobiotica (chloroaniline and chlorophenole). Comparison between wild type and knock-out mutant demonstrates the central role of this gene for metabolizing chloroaniline but significantly less for chlorophenole. The glucosyltransferase preferred UDP-xylose over UDP-glucose indicating its (additional) functioning as…	-1.74851
16.8.3.1	secondary metabolism.flavonoids.dihydroflavonols.dihydroflavonol 4-reductase	medtr7g074850.1	Transcript	(gnl|cdd|36715 : 320.0) no description available & (at2g45400 : 311.0) involved in the regulation of brassinosteroid metabolic pathway; BEN1; FUNCTIONS IN: coenzyme binding, oxidoreductase activity, acting on CH-OH group of donors, binding, catalytic activity; INVOLVED IN: regulation of brassinosteroid biosynthetic process, brassinosteroid metabolic process, response to light intensity, flavonoid…	-1.57286
16.8.3.1	secondary metabolism.flavonoids.dihydroflavonols.dihydroflavonol 4-reductase	medtr7g074870.1	Transcript	(at2g45400 : 269.0) involved in the regulation of brassinosteroid metabolic pathway; BEN1; FUNCTIONS IN: coenzyme binding, oxidoreductase activity, acting on CH-OH group of donors, binding, catalytic activity; INVOLVED IN: regulation of brassinosteroid biosynthetic process, brassinosteroid metabolic process, response to light intensity, flavonoid biosynthetic process; LOCATED IN: cytoplasm; EXPRE…	-2.19671
16.8.3.1	secondary metabolism.flavonoids.dihydroflavonols.dihydroflavonol 4-reductase	medtr7g074880.1	Transcript	(gnl|cdd|36715 : 333.0) no description available & (at2g45400 : 320.0) involved in the regulation of brassinosteroid metabolic pathway; BEN1; FUNCTIONS IN: coenzyme binding, oxidoreductase activity, acting on CH-OH group of donors, binding, catalytic activity; INVOLVED IN: regulation of brassinosteroid biosynthetic process, brassinosteroid metabolic process, response to light intensity, flavonoid…	-2.05635
16.8.3.3	secondary metabolism.flavonoids.dihydroflavonols.flavonoid 3''-monooxygenase	medtr5g070700.1	Transcript	(gnl|cdd|35378 : 457.0) no description available & (at3g26310 : 361.0) putative cytochrome P450; "cytochrome P450, family 71, subfamily B, polypeptide 35" (CYP71B35); FUNCTIONS IN: electron carrier activity, monooxygenase activity, iron ion binding, oxygen binding, heme binding; INVOLVED IN: oxidation reduction; LOCATED IN: endomembrane system; EXPRESSED IN: 17 plant structures; EXPRESSED DURING:…	-1.12416
16.8.3.3	secondary metabolism.flavonoids.dihydroflavonols.flavonoid 3''-monooxygenase	medtr7g056103.1	Transcript	(q42799|c93a2_soybn : 483.0) Cytochrome P450 93A2 (EC 1.14.-.-) - Glycine max (Soybean) & (gnl|cdd|35378 : 455.0) no description available & (at5g06900 : 392.0) member of CYP93D; "cytochrome P450, family 93, subfamily D, polypeptide 1" (CYP93D1); FUNCTIONS IN: electron carrier activity, monooxygenase activity, iron ion binding, oxygen binding, heme binding; INVOLVED IN: oxidation reduction; LOCAT…	-2.08195
16.8.3.3	secondary metabolism.flavonoids.dihydroflavonols.flavonoid 3''-monooxygenase	medtr8g020940.1	Transcript	(ipr001128 : 1500.0) Cytochrome P450 & (gnl|cdd|35378 : 478.0) no description available & (at5g07990 : 434.0) Required for flavonoid 3' hydroxylase activity.; TRANSPARENT TESTA 7 (TT7); CONTAINS InterPro DOMAIN/s: Cytochrome P450 (InterPro:IPR001128), Cytochrome P450, E-class, group I (InterPro:IPR002401), Cytochrome P450, conserved site (InterPro:IPR017972); BEST Arabidopsis thaliana protein mat…	-2.71482
16.8.4	secondary metabolism.flavonoids.flavonols	medtr7g062550.1	Transcript	(gnl|cdd|35365 : 285.0) no description available & (at3g21420 : 281.0) 2-oxoglutarate (2OG) and Fe(II)-dependent oxygenase superfamily protein; FUNCTIONS IN: oxidoreductase activity; INVOLVED IN: metabolic process; LOCATED IN: cellular_component unknown; EXPRESSED IN: 16 plant structures; EXPRESSED DURING: 8 growth stages; CONTAINS InterPro DOMAIN/s: Oxoglutarate/iron-dependent oxygenase (InterPr…	-2.41616
16.8.4	secondary metabolism.flavonoids.flavonols	medtr7g102450.1	Transcript	(at2g36750 : 486.0) UDP-glucosyl transferase 73C1 (UGT73C1); CONTAINS InterPro DOMAIN/s: UDP-glucuronosyl/UDP-glucosyltransferase (InterPro:IPR002213); BEST Arabidopsis thaliana protein match is: don-glucosyltransferase 1 (TAIR:AT2G36800.1); Has 7705 Blast hits to 7611 proteins in 415 species: Archae - 0; Bacteria - 205; Metazoa - 2197; Fungi - 31; Plants - 5129; Viruses - 79; Other Eukaryotes - …	-2.1959
16.8.4	secondary metabolism.flavonoids.flavonols	medtr7g102490.1	Transcript	(at2g36800 : 552.0) Encodes a DON-Glucosyltransferase. The UGT73C5 glucosylates both brassinolide and castasterone in the 23-O position. The enzyme is presumably involved in the homeostasis of those steroid hormones hence regulating BR activity. Transgenic plants overexpressing UGT73C5 show a typical BR-deficient phenotype.; don-glucosyltransferase 1 (DOGT1); CONTAINS InterPro DOMAIN/s: UDP-glucu…	-1.48236
16.8.4	secondary metabolism.flavonoids.flavonols	medtr7g102560.1	Transcript	(at2g36800 : 531.0) Encodes a DON-Glucosyltransferase. The UGT73C5 glucosylates both brassinolide and castasterone in the 23-O position. The enzyme is presumably involved in the homeostasis of those steroid hormones hence regulating BR activity. Transgenic plants overexpressing UGT73C5 show a typical BR-deficient phenotype.; don-glucosyltransferase 1 (DOGT1); CONTAINS InterPro DOMAIN/s: UDP-glucu…	-1.11194
16.8.4	secondary metabolism.flavonoids.flavonols	medtr0009s0480.1	Transcript	(at1g17020 : 375.0) Encodes a novel member of the Fe(II)/ascorbate oxidase gene family; senescence-related gene.; senescence-related gene 1 (SRG1); CONTAINS InterPro DOMAIN/s: Oxoglutarate/iron-dependent oxygenase (InterPro:IPR005123); BEST Arabidopsis thaliana protein match is: 2-oxoglutarate (2OG) and Fe(II)-dependent oxygenase superfamily protein (TAIR:AT1G17010.1); Has 8560 Blast hits to 8517…	0.782101
16.8.4.1	secondary metabolism.flavonoids.flavonols.flavonol synthase (FLS)	medtr3g040410.1	Transcript	(gnl|cdd|35365 : 212.0) no description available & (gnl|cdd|33294 : 179.0) no description available & (at3g11180 : 137.0) 2-oxoglutarate (2OG) and Fe(II)-dependent oxygenase superfamily protein; FUNCTIONS IN: oxidoreductase activity, iron ion binding; INVOLVED IN: oxidation reduction; LOCATED IN: cellular_component unknown; EXPRESSED IN: inflorescence meristem, male gametophyte, flower, pollen tu…	-1.0728
16.8.4.2	secondary metabolism.flavonoids.flavonols.flavonol 3-O-glycosyltransferase	medtr4g108250.1	Transcript	(at4g34131 : 392.0) UDP-glucosyl transferase 73B3 (UGT73B3); FUNCTIONS IN: transferase activity, transferring hexosyl groups, quercetin 3-O-glucosyltransferase activity, UDP-glycosyltransferase activity, UDP-glucosyltransferase activity; INVOLVED IN: response to cyclopentenone, response to other organism; LOCATED IN: endomembrane system; CONTAINS InterPro DOMAIN/s: UDP-glucuronosyl/UDP-glucosyltr…	-1.0583
16.2	secondary metabolism.phenylpropanoids	medtr2g028620.1	Transcript	(at2g02400 : 434.0) NAD(P)-binding Rossmann-fold superfamily protein; FUNCTIONS IN: coenzyme binding, binding, cinnamoyl-CoA reductase activity, catalytic activity; INVOLVED IN: lignin biosynthetic process, cellular metabolic process, metabolic process; LOCATED IN: plasma membrane; EXPRESSED IN: 23 plant structures; EXPRESSED DURING: 15 growth stages; CONTAINS InterPro DOMAIN/s: NAD-dependent epi…	1.06186
16.2	secondary metabolism.phenylpropanoids	medtr3g071320.1	Transcript	(at2g40230 : 495.0) HXXXD-type acyl-transferase family protein; FUNCTIONS IN: transferase activity, transferring acyl groups other than amino-acyl groups, transferase activity; INVOLVED IN: biological_process unknown; LOCATED IN: cellular_component unknown; EXPRESSED IN: 16 plant structures; EXPRESSED DURING: 7 growth stages; CONTAINS InterPro DOMAIN/s: Transferase (InterPro:IPR003480); BEST Arab…	2.81954
16.2	secondary metabolism.phenylpropanoids	medtr3g101900.1	Transcript	(at5g42830 : 477.0) HXXXD-type acyl-transferase family protein; FUNCTIONS IN: transferase activity, transferring acyl groups other than amino-acyl groups, transferase activity; INVOLVED IN: biological_process unknown; LOCATED IN: cellular_component unknown; EXPRESSED IN: 17 plant structures; EXPRESSED DURING: 12 growth stages; CONTAINS InterPro DOMAIN/s: Transferase (InterPro:IPR003480); BEST Ara…	-1.75403
16.2	secondary metabolism.phenylpropanoids	medtr4g015180.1	Transcript	(at5g01210 : 578.0) HXXXD-type acyl-transferase family protein; FUNCTIONS IN: transferase activity, transferring acyl groups other than amino-acyl groups, transferase activity; INVOLVED IN: biological_process unknown; LOCATED IN: cellular_component unknown; EXPRESSED IN: 22 plant structures; EXPRESSED DURING: 13 growth stages; CONTAINS InterPro DOMAIN/s: Transferase (InterPro:IPR003480); BEST Ara…	-1.72359
16.2	secondary metabolism.phenylpropanoids	medtr5g026320.1	Transcript	(at1g31490 : 555.0) HXXXD-type acyl-transferase family protein; FUNCTIONS IN: transferase activity, transferring acyl groups other than amino-acyl groups, quinone binding, primary amine oxidase activity, copper ion binding, transferase activity; INVOLVED IN: oxidation reduction, amine metabolic process; LOCATED IN: chloroplast; EXPRESSED IN: 8 plant structures; EXPRESSED DURING: 4 anthesis, C glo…	-3.60339
16.2.1.3	secondary metabolism.phenylpropanoids.lignin biosynthesis.4CL	medtr2g095510.1	Transcript	(at4g05160 : 754.0) Encodes a peroxisomal protein involved in the activation of fatty acids through esterification with CoA. At4g05160 preferentially activates fatty acids with medium chain length (C6:0 and C7:0) as well as even-numbered long-chain fatty acids (C14:0, C16:0 and C18:0). At4g05160 was also able to catalyze the conversion of OPC-6:0 to its CoA ester and is therefore thought to be in…	-1.26249
16.2.1.6	secondary metabolism.phenylpropanoids.lignin biosynthesis.CCoAOMT	medtr8g021225.1	Transcript	(at4g26220 : 278.0) S-adenosyl-L-methionine-dependent methyltransferases superfamily protein; FUNCTIONS IN: O-methyltransferase activity; LOCATED IN: cytosol; EXPRESSED IN: shoot, inflorescence meristem, root, flower; EXPRESSED DURING: petal differentiation and expansion stage, seed development stages; CONTAINS InterPro DOMAIN/s: O-methyltransferase, family 3 (InterPro:IPR002935); BEST Arabidopsi…	-2.08885
16.2.1.8	secondary metabolism.phenylpropanoids.lignin biosynthesis.F5H	medtr5g070700.1	Transcript	(gnl|cdd|35378 : 457.0) no description available & (at3g26310 : 361.0) putative cytochrome P450; "cytochrome P450, family 71, subfamily B, polypeptide 35" (CYP71B35); FUNCTIONS IN: electron carrier activity, monooxygenase activity, iron ion binding, oxygen binding, heme binding; INVOLVED IN: oxidation reduction; LOCATED IN: endomembrane system; EXPRESSED IN: 17 plant structures; EXPRESSED DURING:…	-1.12416
16.2.1.9	secondary metabolism.phenylpropanoids.lignin biosynthesis.COMT	medtr3g092900.1	Transcript	(p28002|comt1_medsa : 752.0) Caffeic acid 3-O-methyltransferase (EC 2.1.1.68) (S-adenosysl-L-methionine:caffeic acid 3-O-methyltransferase) (COMT) (CAOMT) - Medicago sativa (Alfalfa) & (at5g54160 : 602.0) A caffeic acid/5-hydroxyferulic acid O-methyltransferase. Interacts with 14-4-3 proteins in yeast 2 hybrid assay. AtOMT1 (At5g54160) encodes a flavonol 3??-O-methyltransferase that is highly act…	-0.967554
16.2.1.10	secondary metabolism.phenylpropanoids.lignin biosynthesis.CAD	medtr5g031305.1	Transcript	(q9zrf1|mtdh_fraan : 556.0) Probable mannitol dehydrogenase (EC 1.1.1.255) (NAD-dependent mannitol dehydrogenase) - Fragaria ananassa (Strawberry) & (at4g37980 : 487.0) elicitor-activated gene 3-1 (ELI3-1); FUNCTIONS IN: oxidoreductase activity, zinc ion binding; INVOLVED IN: response to bacterium, plant-type hypersensitive response; EXPRESSED IN: 20 plant structures; EXPRESSED DURING: 13 growth …	-3.90251
16.2.1.10	secondary metabolism.phenylpropanoids.lignin biosynthesis.CAD	medtr5g031310.1	Transcript	(q9zrf1|mtdh_fraan : 569.0) Probable mannitol dehydrogenase (EC 1.1.1.255) (NAD-dependent mannitol dehydrogenase) - Fragaria ananassa (Strawberry) & (gnl|cdd|35246 : 488.0) no description available & (at4g37980 : 487.0) elicitor-activated gene 3-1 (ELI3-1); FUNCTIONS IN: oxidoreductase activity, zinc ion binding; INVOLVED IN: response to bacterium, plant-type hypersensitive response; EXPRESSED IN…	-2.99054
16.1	secondary metabolism.simple phenols	medtr7g458880.1	Transcript	(at5g60020 : 884.0) putative laccase, a member of laccase family of genes (17 members in Arabidopsis).; laccase 17 (LAC17); FUNCTIONS IN: laccase activity; INVOLVED IN: oxidation reduction, lignin catabolic process; LOCATED IN: endomembrane system, apoplast; EXPRESSED IN: 14 plant structures; EXPRESSED DURING: LP.04 four leaves visible, 4 anthesis, C globular stage, petal differentiation and expa…	1.99968
Amino acid metabolism
13.1.2.2.1	amino acid metabolism.synthesis.glutamate family.proline.delta 1-pyrroline-5-carboxylate synthetase	medtr4g020110.1	Transcript	(o04015|p5cs_actch : 989.0) Delta 1-pyrroline-5-carboxylate synthetase (P5CS) [Includes: Glutamate 5-kinase (EC 2.7.2.11) (Gamma-glutamyl kinase) (GK); Gamma-glutamyl phosphate reductase (GPR) (EC 1.2.1.41) (Glutamate-5-semialdehyde dehydrogenase) (Glutamyl-gamma- & (at2g39800 : 964.0) delta1-pyrroline-5-carboxylate synthase 1 (P5CS1); CONTAINS InterPro DOMAIN/s: Glutamate 5-kinase (InterPro:IPR0…	4.92516
13.1.3.4.12	amino acid metabolism.synthesis.aspartate family.methionine.homocysteine S-methyltransferase	medtr2g035820.1	Transcript	(at3g17365 : 312.0) S-adenosyl-L-methionine-dependent methyltransferases superfamily protein; FUNCTIONS IN: methyltransferase activity, catalytic activity; INVOLVED IN: metabolic process; LOCATED IN: cellular_component unknown; EXPRESSED IN: 23 plant structures; EXPRESSED DURING: 13 growth stages; CONTAINS InterPro DOMAIN/s: Methyltransferase type 11 (InterPro:IPR013216); BEST Arabidopsis thalian…	0.948603
13.1.4.1.4	amino acid metabolism.synthesis.branched chain group.common.branched-chain amino acid aminotransferase	medtr4g092590.1	Transcript	(at1g50110 : 426.0) D-aminoacid aminotransferase-like PLP-dependent enzymes superfamily protein; FUNCTIONS IN: branched-chain-amino-acid transaminase activity, catalytic activity; INVOLVED IN: branched chain family amino acid metabolic process, metabolic process; LOCATED IN: cellular_component unknown; EXPRESSED IN: 18 plant structures; EXPRESSED DURING: 9 growth stages; CONTAINS InterPro DOMAIN/…	1.28812
13.1.5.1.1	amino acid metabolism.synthesis.serine-glycine-cysteine group.serine.phosphoglycerate dehydrogenase	medtr4g005880.1	Transcript	(at1g17745 : 824.0) encodes a 3-Phosphoglycerate dehydrogenase; D-3-phosphoglycerate dehydrogenase; CONTAINS InterPro DOMAIN/s: D-3-phosphoglycerate dehydrogenase (InterPro:IPR006236), D-isomer specific 2-hydroxyacid dehydrogenase, catalytic domain (InterPro:IPR006139), D-isomer specific 2-hydroxyacid dehydrogenase, NAD-binding (InterPro:IPR006140), D-3-phosphogylcerate Dehydrogenase (InterPro:IP…	-2.59419
13.1.5.3.1	amino acid metabolism.synthesis.serine-glycine-cysteine group.cysteine.OASTL	medtr1g081620.1	Transcript	(gnl|cdd|36466 : 450.0) no description available & (o81154|cysk_soltu : 427.0) Cysteine synthase (EC 2.5.1.47) (O-acetylserine sulfhydrylase) (O-acetylserine (Thiol)-lyase) (CSase A) (CS-A) (OAS-TL A) - Solanum tuberosum (Potato) & (at4g14880 : 420.0) Encodes a cytosolic isoform of cytosolic O-acetylserine(thiol)lyase, a key enzyme in cysteine biosynthesis and for the fixation of inorganic sulfid…	-1.40654
13.1.5.3.1	amino acid metabolism.synthesis.serine-glycine-cysteine group.cysteine.OASTL	medtr1g081625.1	Transcript	(gnl|cdd|36466 : 449.0) no description available & (o23733|cysk1_braju : 426.0) Cysteine synthase (EC 2.5.1.47) (O-acetylserine sulfhydrylase) (O-acetylserine (Thiol)-lyase) (CSase) (OAS-TL) (OAS-TL4) - Brassica juncea (Leaf mustard) (Indian mustard) & (at4g14880 : 420.0) Encodes a cytosolic isoform of cytosolic O-acetylserine(thiol)lyase, a key enzyme in cysteine biosynthesis and for the fixatio…	-1.516
13.1.5.3.2	amino acid metabolism.synthesis.serine-glycine-cysteine group.cysteine.SAT	medtr5g095470.1	Transcript	(at3g13110 : 340.0) Encodes a mitochondrial serine O-acetyltransferase involved in sulfur assimilation and cysteine biosynthesis. Expressed in the vascular system.; serine acetyltransferase 2;2 (SERAT2;2); FUNCTIONS IN: zinc ion binding, serine O-acetyltransferase activity; INVOLVED IN: response to cadmium ion, cysteine biosynthetic process; LOCATED IN: mitochondrion; EXPRESSED IN: 26 plant struc…	-0.904296
13.1.6.2.1	amino acid metabolism.synthesis.aromatic aa.phenylalanine and tyrosine.chorismate mutase	medtr1g013820.1	Transcript	(gnl|cdd|36014 : 319.0) no description available & (at5g10870 : 288.0) Encodes chorismate mutase AtCM2.; chorismate mutase 2 (CM2); CONTAINS InterPro DOMAIN/s: Chorismate mutase, type II (InterPro:IPR020822), Chorismate mutase, AroQ class, eukaryotic type (InterPro:IPR008238); BEST Arabidopsis thaliana protein match is: chorismate mutase 3 (TAIR:AT1G69370.1); Has 1807 Blast hits to 1807 proteins …	-1.34806
13.1.6.5.1	amino acid metabolism.synthesis.aromatic aa.tryptophan.anthranilate synthase	medtr1g114520.1	Transcript	(at2g29690 : 774.0) Encode a functional anthranilate synthase protein. Expressed at a constitutive basal level. Expression was not induced by wounding nor bacterial pathogen infiltration. Involved in aromatic amino acid biosynthesis.; anthranilate synthase 2 (ASA2); FUNCTIONS IN: anthranilate synthase activity; INVOLVED IN: tryptophan biosynthetic process, aromatic amino acid family biosynthetic …	-1.09014
13.2.2.2	amino acid metabolism.degradation.glutamate family.proline	medtr4g107940.1	Transcript	(at5g62530 : 959.0) Encodes mitochondrial Delta-pyrroline-5- carboxylate dehydrogenase. Involved in the catabolism of proline to glutamate. Involved in protection from proline toxicity. Induced at pathogen infection sites. P5CDH and SRO5 (an overlapping gene in the sense orientation) generate 24-nt and 21-nt siRNAs, which together are components of a regulatory loop controlling reactive oxygen sp…	1.30004
13.2.2.3	amino acid metabolism.degradation.glutamate family.arginine	medtr7g090160.1	Transcript	(q04708|p5cr_pea : 355.0) Pyrroline-5-carboxylate reductase (EC 1.5.1.2) (P5CR) (P5C reductase) - Pisum sativum (Garden pea) & (at5g14800 : 313.0) Delta 1-pyrroline-5-carboxylate reductase, catalyzes the final step in proline biosynthesis from glutamate and ornithine.In situ hybridization indicated that under normal growth conditions, the highest concentration of P5CR transcripts occurs in the co…	1.6404
13.2.3.5.1	mino acid metabolism.degradation.aspartate family.lysine.lysine decarboxylase	medtr4g058740.1	Transcript	(at2g28305 : 354.0) LONELY GUY 1 (LOG1); CONTAINS InterPro DOMAIN/s: Conserved hypothetical protein CHP00730 (InterPro:IPR005269); BEST Arabidopsis thaliana protein match is: lysine decarboxylase family protein (TAIR:AT2G37210.1); Has 5303 Blast hits to 5301 proteins in 1556 species: Archae - 26; Bacteria - 3660; Metazoa - 10; Fungi - 132; Plants - 396; Viruses - 0; Other Eukaryotes - 1079 (sourc…	1.45463
13.2.3.4.1	amino acid metabolism.degradation.aspartate family.methionine.methionine gamma-lyase	medtr1g077890.1	Transcript	(at1g64660 : 619.0) Encodes a functional methionine gamma-lyase, a cytosolic enzyme catalyzes the degradation of methionine into methanethiol, alpha-ketobutyrate and ammonia. The catabolism of excess methionine is important to methionine homeostasis.; methionine gamma-lyase (MGL); CONTAINS InterPro DOMAIN/s: Pyridoxal phosphate-dependent transferase, major domain (InterPro:IPR015424), Cys/Met met…	2.53188
13.2.4.5	amino acid metabolism.degradation.branched chain group.isoleucine	medtr4g022430.1	Transcript	(gnl|cdd|36603 : 621.0) no description available & (at2g33150 : 613.0) Encodes an organellar (peroxisome, glyoxysome) 3-ketoacyl-CoA thiolase, involved in fatty acid b-oxidation during germination and subsequent seedling growth. Mutants have defects in glyoxysomal fatty acid beta-oxidation. EC2.3.1.16 thiolase.; peroxisomal 3-ketoacyl-CoA thiolase 3 (PKT3); FUNCTIONS IN: acetyl-CoA C-acyltransfer…	-1.25362
13.2.4.1	amino acid metabolism.degradation.branched chain group.shared	medtr3g088845.1	Transcript	(gnl|cdd|36396 : 631.0) no description available & (at1g21400 : 597.0) Thiamin diphosphate-binding fold (THDP-binding) superfamily protein; FUNCTIONS IN: oxidoreductase activity, acting on the aldehyde or oxo group of donors, disulfide as acceptor, 3-methyl-2-oxobutanoate dehydrogenase (2-methylpropanoyl-transferring) activity; INVOLVED IN: metabolic process; EXPRESSED IN: guard cell; CONTAINS In…	4.18188
13.2.4.1	amino acid metabolism.degradation.branched chain group.shared	medtr4g022430.1	Transcript	(gnl|cdd|36603 : 621.0) no description available & (at2g33150 : 613.0) Encodes an organellar (peroxisome, glyoxysome) 3-ketoacyl-CoA thiolase, involved in fatty acid b-oxidation during germination and subsequent seedling growth. Mutants have defects in glyoxysomal fatty acid beta-oxidation. EC2.3.1.16 thiolase.; peroxisomal 3-ketoacyl-CoA thiolase 3 (PKT3); FUNCTIONS IN: acetyl-CoA C-acyltransfer…	-1.25362
13.2.5.3	amino acid metabolism.degradation.serine-glycine-cysteine group.cysteine	medtr2g067080.1	Transcript	(at1g79230 : 530.0) encodes a sulfurtransferase/rhodaneses, which belongs to a group of enzymes widely distributed in all three phyla that catalyze the transfer of sulfur from a donor to a thiophilic acceptor substrate. The protein and transcript levels are NOT affected by senescence or exogenous cyanide, suggesting that sulfurtransferases are involved in cyanide detoxification.; mercaptopyruvate…	-0.777031
13.2.7	amino acid metabolism.degradation.histidine	medtr2g008120.1	Transcript	(at1g43710 : 811.0) embryo defective 1075 (emb1075); FUNCTIONS IN: pyridoxal phosphate binding, carboxy-lyase activity, catalytic activity; INVOLVED IN: cellular amino acid metabolic process, embryo development ending in seed dormancy; LOCATED IN: cellular_component unknown; EXPRESSED IN: 25 plant structures; EXPRESSED DURING: 15 growth stages; CONTAINS InterPro DOMAIN/s: Pyridoxal phosphate-depe…	0.655408
13.2.7	amino acid metabolism.degradation.histidine	medtr6g071995.1	Transcript	(at1g43710 : 103.0) embryo defective 1075 (emb1075); FUNCTIONS IN: pyridoxal phosphate binding, carboxy-lyase activity, catalytic activity; INVOLVED IN: cellular amino acid metabolic process, embryo development ending in seed dormancy; LOCATED IN: cellular_component unknown; EXPRESSED IN: 25 plant structures; EXPRESSED DURING: 15 growth stages; CONTAINS InterPro DOMAIN/s: Pyridoxal phosphate-depe…	0.649593
Redox-related pathways
21.3	redox.heme	medtr1g008700.1	Transcript	(at4g32690 : 252.0) Encodes a hemoglobin (Hb) with a central domain similar to the 'truncated Hbs of bacteria, protozoa and fungi. The 3D structure of these types of Hbs is a 2-on-2 arrangement of alpha-helices as opposed to the 3-on-3 arrangement of the standard globin fold. This type of Hb is not found in animals or yeast.; hemoglobin 3 (GLB3); CONTAINS InterPro DOMAIN/s: Globin, truncated bact…	-1.02179
21.1	redox.thioredoxin	medtr2g010750.1	Transcript	(at1g11530 : 152.0) Encodes a monocysteinic thioredoxin, thioredoxin in which the second cysteine of the redox site is replaced by a serine, with low disulfide reductase but efficient disulfide isomerase activity.; C-terminal cysteine residue is changed to a serine 1 (CXXS1); CONTAINS InterPro DOMAIN/s: Thioredoxin fold (InterPro:IPR012335), Thioredoxin, core (InterPro:IPR015467), Thioredoxin-lik…	-0.776691
21.1	redox.thioredoxin	medtr6g092700.1	Transcript	(at4g29670 : 239.0) Encodes a member of the thioredoxin family protein. Located in the chloroplast. Shows high activity towards the chloroplast 2-Cys peroxiredoxin A, and poor activity towards the chloroplast NADP-malate dehydrogenase.; atypical CYS HIS rich thioredoxin 2 (ACHT2); FUNCTIONS IN: oxidoreductase activity, acting on sulfur group of donors, disulfide as acceptor; INVOLVED IN: cell red…	-0.858163
21.1	redox.thioredoxin	medtr8g076890.1	Transcript	(at5g66410 : 259.0) Encodes a protein that functions in microtubule assembly. Plants with reduced levels of both PLP3a (At3g50960) and PLP3b show defects in cytokinesis, cortical microtubule array formation, oriented cell growth, and maintenance of proper ploidy.; phosducin-like protein 3 homolog (PLP3b); CONTAINS InterPro DOMAIN/s: Thioredoxin fold (InterPro:IPR012335), Thioredoxin domain (Inter…	0.714068
21.2	redox.ascorbate and glutathione	medtr1g043760.1	Transcript	(at1g06620 : 360.0) encodes a protein whose sequence is similar to a 2-oxoglutarate-dependent dioxygenase; 2-oxoglutarate (2OG) and Fe(II)-dependent oxygenase superfamily protein; CONTAINS InterPro DOMAIN/s: Oxoglutarate/iron-dependent oxygenase (InterPro:IPR005123); BEST Arabidopsis thaliana protein match is: 2-oxoglutarate (2OG) and Fe(II)-dependent oxygenase superfamily protein (TAIR:AT3G61400…	1.72828
21.2	redox.ascorbate and glutathione	medtr3g040410.1	Transcript	(gnl|cdd|35365 : 212.0) no description available & (gnl|cdd|33294 : 179.0) no description available & (at3g11180 : 137.0) 2-oxoglutarate (2OG) and Fe(II)-dependent oxygenase superfamily protein; FUNCTIONS IN: oxidoreductase activity, iron ion binding; INVOLVED IN: oxidation reduction; LOCATED IN: cellular_component unknown; EXPRESSED IN: inflorescence meristem, male gametophyte, flower, pollen tu…	-1.0728
21.2	redox.ascorbate and glutathione	medtr8g009120.1	Transcript	(at5g59540 : 381.0) 2-oxoglutarate (2OG) and Fe(II)-dependent oxygenase superfamily protein; FUNCTIONS IN: oxidoreductase activity; INVOLVED IN: biological_process unknown; LOCATED IN: cellular_component unknown; EXPRESSED IN: 17 plant structures; EXPRESSED DURING: 9 growth stages; CONTAINS InterPro DOMAIN/s: Oxoglutarate/iron-dependent oxygenase (InterPro:IPR005123); BEST Arabidopsis thaliana pr…	-1.4615
21.2.2	redox.ascorbate and glutathione.glutathione	medtr7g113880.1	Transcript	(gnl|cdd|86474 : 720.0) no description available & (o23732|gshb_braju : 645.0) Glutathione synthetase, chloroplast precursor (EC 6.3.2.3) (Glutathione synthase) (GSH synthetase) (GSH-S) - Brassica juncea (Leaf mustard) (Indian mustard) & (at5g27380 : 635.0) Encodes a protein with similarity to glutathione synthetases, which catalyzes one of the early steps in glutathione biosynthesis. Two transcr…	-1.0897
21.2.2	redox.ascorbate and glutathione.glutathione	medtr8g098400.1	Transcript	(at1g63460 : 260.0) glutathione peroxidase 8 (GPX8); FUNCTIONS IN: glutathione peroxidase activity; INVOLVED IN: response to oxidative stress, oxidation reduction; LOCATED IN: cellular_component unknown; EXPRESSED IN: 22 plant structures; EXPRESSED DURING: 13 growth stages; CONTAINS InterPro DOMAIN/s: Thioredoxin fold (InterPro:IPR012335), Thioredoxin-like fold (InterPro:IPR012336), Glutathione p…	-0.726988
21.4	redox.glutaredoxins	medtr1g035690.1	Transcript	(at3g11920 : 577.0) glutaredoxin-related; FUNCTIONS IN: electron carrier activity, protein disulfide oxidoreductase activity; INVOLVED IN: intracellular signaling pathway, cell redox homeostasis; LOCATED IN: cellular_component unknown; CONTAINS InterPro DOMAIN/s: Winged helix-turn-helix transcription repressor DNA-binding (InterPro:IPR011991), Thioredoxin fold (InterPro:IPR012335), Glutaredoxin (…	-1.30867
21.4	redox.glutaredoxins	medtr2g090755.1	Transcript	(at1g28480 : 128.0) Encodes GRX480, a member of the glutaredoxin family that regulates protein redox state. GRX480 interacts with TGA factors and suppresses JA-responsive PDF1.2 transcription. GRX480 transcription is SA-inducible and requires NPR1. Maybe involved in SA/JA cross-talk.; GRX480; FUNCTIONS IN: electron carrier activity, protein disulfide oxidoreductase activity; INVOLVED IN: salicyli…	-1.17452
ERF, bZIP, DOF, MYB, MYB-related, WRKY transcription factors
27.3.3	RNA.regulation of transcription.AP2/EREBP, APETALA2/Ethylene-responsive element binding protein family	medtr1g093600.1	Transcript	(at1g25560 : 383.0) Encodes a member of the RAV transcription factor family that contains AP2 and B3 binding domains. Involved in the regulation of flowering under long days. Loss of function results in early flowering. Overexpression causes late flowering and repression of expression of FT. Novel transcriptional regulator involved in ethylene signaling. Promoter bound by EIN3. EDF1 in turn, bind…	-4.84428
27.3.3	RNA.regulation of transcription.AP2/EREBP, APETALA2/Ethylene-responsive element binding protein family	medtr3g110205.1	Transcript	(at5g11590 : 187.0) encodes a member of the DREB subfamily A-4 of ERF/AP2 transcription factor family. The protein contains one AP2 domain. There are 17 members in this subfamily including TINY.; TINY2 (TINY2); FUNCTIONS IN: DNA binding, sequence-specific DNA binding transcription factor activity; INVOLVED IN: regulation of transcription, DNA-dependent; LOCATED IN: nucleus; EXPRESSED IN: shoot ap…	3.66276
27.3.3	RNA.regulation of transcription.AP2/EREBP, APETALA2/Ethylene-responsive element binding protein family	medtr5g053920.1	Transcript	(at1g25560 : 380.0) Encodes a member of the RAV transcription factor family that contains AP2 and B3 binding domains. Involved in the regulation of flowering under long days. Loss of function results in early flowering. Overexpression causes late flowering and repression of expression of FT. Novel transcriptional regulator involved in ethylene signaling. Promoter bound by EIN3. EDF1 in turn, bind…	-1.69706
27.3.3	RNA.regulation of transcription.AP2/EREBP, APETALA2/Ethylene-responsive element binding protein family	medtr6g465530.1	Transcript	(at4g25470 : 202.0) Encodes a member of the DREB subfamily A-1 of ERF/AP2 transcription factor family (CBF2). The protein contains one AP2 domain. There are six members in this subfamily, including CBF1, CBF2, and CBF3. This gene is involved in response to low temperature, abscisic acid, and circadian rhythm. Overexpressing this gene leads to increased freeze tolerance and induces the expression …	-2.41042
27.3.3	RNA.regulation of transcription.AP2/EREBP, APETALA2/Ethylene-responsive element binding protein family	medtr7g020980.1	Transcript	(gnl|cdd|47695 : 113.0) no description available & (at5g07310 : 106.0) encodes a member of the ERF (ethylene response factor) subfamily B-4 of ERF/AP2 transcription factor family. The protein contains one AP2 domain. There are 7 members in this subfamily.; Integrase-type DNA-binding superfamily protein; FUNCTIONS IN: DNA binding, sequence-specific DNA binding transcription factor activity; INVOLV…	-3.368
27.3.3	RNA.regulation of transcription.AP2/EREBP, APETALA2/Ethylene-responsive element binding protein family	medtr7g021010.1	Transcript	(gnl|cdd|47695 : 109.0) no description available & (at5g13330 : 81.6) encodes a member of the ERF (ethylene response factor) subfamily B-4 of ERF/AP2 transcription factor family. The protein contains one AP2 domain. There are 7 members in this subfamily.; related to AP2 6l (Rap2.6L); FUNCTIONS IN: DNA binding, sequence-specific DNA binding transcription factor activity; INVOLVED IN: regulation of…	-2.99493
27.3.3	RNA.regulation of transcription.AP2/EREBP, APETALA2/Ethylene-responsive element binding protein family	medtr7g100590.1	Transcript	(at2g28550 : 308.0) related to AP2.7 (RAP2.7); CONTAINS InterPro DOMAIN/s: DNA-binding, integrase-type (InterPro:IPR016177), Pathogenesis-related transcriptional factor/ERF, DNA-binding (InterPro:IPR001471); BEST Arabidopsis thaliana protein match is: target of early activation tagged (EAT) 2 (TAIR:AT5G60120.1). & (q8l3u3|bbm1_brana : 141.0) Protein BABY BOOM 1 (BnBBM1) - Brassica napus (Rape) & …	1.43724
27.3.3	RNA.regulation of transcription.AP2/EREBP, APETALA2/Ethylene-responsive element binding protein family	medtr8g020510.1	Transcript	(at1g72570 : 318.0) Integrase-type DNA-binding superfamily protein; CONTAINS InterPro DOMAIN/s: DNA-binding, integrase-type (InterPro:IPR016177), Pathogenesis-related transcriptional factor/ERF, DNA-binding (InterPro:IPR001471); BEST Arabidopsis thaliana protein match is: AINTEGUMENTA-like 5 (TAIR:AT5G57390.1); Has 7692 Blast hits to 5276 proteins in 259 species: Archae - 0; Bacteria - 12; Metazo…	1.68996
27.3.3	RNA.regulation of transcription.AP2/EREBP, APETALA2/Ethylene-responsive element binding protein family	medtr8g090350.1	Transcript	(at4g39780 : 197.0) encodes a member of the DREB subfamily A-6 of ERF/AP2 transcription factor family. The protein contains one AP2 domain. There are 8 members in this subfamily including RAP2.4.; Integrase-type DNA-binding superfamily protein; FUNCTIONS IN: DNA binding, sequence-specific DNA binding transcription factor activity; INVOLVED IN: regulation of transcription, DNA-dependent; LOCATED I…	-1.26665
27.3.35	RNA.regulation of transcription.bZIP transcription factor family	medtr7g104190.1	Transcript	(at1g19490 : 136.0) Basic-leucine zipper (bZIP) transcription factor family protein; FUNCTIONS IN: DNA binding, sequence-specific DNA binding transcription factor activity; INVOLVED IN: regulation of transcription, DNA-dependent; LOCATED IN: chloroplast; CONTAINS InterPro DOMAIN/s: Basic-leucine zipper (bZIP) transcription factor (InterPro:IPR004827), bZIP transcription factor, bZIP-1 (InterPro:I…	3.27895
27.3.35	RNA.regulation of transcription.bZIP transcription factor family	medtr7g116890.1	Transcript	(q99089|cprf1_petcr : 299.0) Common plant regulatory factor CPRF-1 - Petroselinum crispum (Parsley) (Petroselinum hortense) & (at2g46270 : 257.0) encodes a bZIP G-box binding protein whose expression is induced by ABA. It has been shown to bind to Adh that contains the G-box and is induced by cold and water deprivation. GBF3 has been shown to be expressed mostly in the root and dark-grown leaves.…	1.22567
27.3.8	RNA.regulation of transcription.C2C2(Zn) DOF zinc finger family	medtr3g077750.1	Transcript	(at5g62940 : 164.0) HCA2 induces the formation of interfascicular cambium and regulates vascular tissue development in the aerial parts of the plant. Evidence from both gain of function and dominant negative alleles.; HIGH CAMBIAL ACTIVITY2 (HCA2); CONTAINS InterPro DOMAIN/s: Zinc finger, Dof-type (InterPro:IPR003851); BEST Arabidopsis thaliana protein match is: TARGET OF MONOPTEROS 6 (TAIR:AT5G6…	3.39425
27.3.8	RNA.regulation of transcription.C2C2(Zn) DOF zinc finger family	medtr5g041380.1	Transcript	(at5g62430 : 192.0) Dof-type zinc finger domain-containing protein, similar to H-protein promoter binding factor-2a GI:3386546 from (Arabidopsis thaliana). Represses expression of Constans (CO), a circadian regulator of flowering time. Interacts with LKP2 and FKF1. Expression oscillates under constant light conditions. Mainly expressed in the vasculature of cotyledons, leaves and hypocotyls, but …	1.52279
27.3.8	RNA.regulation of transcription.C2C2(Zn) DOF zinc finger family	medtr5g041400.1	Transcript	(at5g62430 : 195.0) Dof-type zinc finger domain-containing protein, similar to H-protein promoter binding factor-2a GI:3386546 from (Arabidopsis thaliana). Represses expression of Constans (CO), a circadian regulator of flowering time. Interacts with LKP2 and FKF1. Expression oscillates under constant light conditions. Mainly expressed in the vasculature of cotyledons, leaves and hypocotyls, but …	1.84313
27.3.8	RNA.regulation of transcription.C2C2(Zn) DOF zinc finger family	medtr6g012450.1	Transcript	(at5g39660 : 251.0) Dof-type zinc finger domain-containing protein, identical to H-protein promoter binding factor-2a GI:3386546 from (Arabidopsis thaliana). Interacts with LKP2 and FKF1, but its overexpression does not change flowering time under short or long day conditions.; cycling DOF factor 2 (CDF2); CONTAINS InterPro DOMAIN/s: Zinc finger, Dof-type (InterPro:IPR003851); BEST Arabidopsis th…	1.62555
27.3.25	RNA.regulation of transcription.MYB domain transcription factor family	medtr1g076150.1	Transcript	(at2g31180 : 219.0) Member of the R2R3 factor gene family.; myb domain protein 14 (MYB14); CONTAINS InterPro DOMAIN/s: SANT, DNA-binding (InterPro:IPR001005), Homeodomain-like (InterPro:IPR009057), Myb, DNA-binding (InterPro:IPR014778), HTH transcriptional regulator, Myb-type, DNA-binding (InterPro:IPR017930), Homeodomain-related (InterPro:IPR012287), Myb transcription factor (InterPro:IPR015495)…	-1.53965
27.3.25	RNA.regulation of transcription.MYB domain transcription factor family	medtr3g039990.1	Transcript	(at5g62470 : 298.0) Encodes a R2R3 type Myb transcription factor whose expression is strongly induced by abscisic acid. Mediates abscisic acid signaling during drought stress response.; myb domain protein 96 (MYB96); CONTAINS InterPro DOMAIN/s: SANT, DNA-binding (InterPro:IPR001005), Homeodomain-like (InterPro:IPR009057), Myb, DNA-binding (InterPro:IPR014778), HTH transcriptional regulator, Myb-t…	1.72566
27.3.25	RNA.regulation of transcription.MYB domain transcription factor family	medtr4g102380.1	Transcript	(q50ex6|odo1_pethy : 290.0) ODORANT1 protein (MYB-like protein ODO1) - Petunia hybrida (Petunia) & (at4g12350 : 273.0) Encodes a putative transcription factor (MYB42).; myb domain protein 42 (MYB42); CONTAINS InterPro DOMAIN/s: SANT, DNA-binding (InterPro:IPR001005), Homeodomain-like (InterPro:IPR009057), Myb, DNA-binding (InterPro:IPR014778), HTH transcriptional regulator, Myb-type, DNA-binding …	1.48617
27.3.25	RNA.regulation of transcription.MYB domain transcription factor family	medtr5g082910.1	Transcript	(at3g50060 : 156.0) Encodes a member of the R2R3 transcription factor gene family. Expressed in response to potassium deprivation and auxin. Involved in lateral root development. Interacts with ARF7 and regulates the expression of some auxin responsive genes.; myb domain protein 77 (MYB77); CONTAINS InterPro DOMAIN/s: SANT, DNA-binding (InterPro:IPR001005), Homeodomain-like (InterPro:IPR009057), …	2.53138
27.3.25	RNA.regulation of transcription.MYB domain transcription factor family	medtr7g089210.1	Transcript	(at4g39250 : 100.0) RAD-like 1 (RL1); CONTAINS InterPro DOMAIN/s: Molecular chaperone, heat shock protein, Hsp40, DnaJ (InterPro:IPR015609), SANT, DNA-binding (InterPro:IPR001005), Myb, DNA-binding (InterPro:IPR014778), Homeodomain-like (InterPro:IPR009057), SANT, eukarya (InterPro:IPR017884); BEST Arabidopsis thaliana protein match is: Homeodomain-like superfamily protein (TAIR:AT2G21650.1); Has…	-3.23971
27.3.25	RNA.regulation of transcription.MYB domain transcription factor family	medtr7g115530.1	Transcript	(at5g29000 : 220.0) Homeodomain-like superfamily protein; FUNCTIONS IN: DNA binding, sequence-specific DNA binding transcription factor activity; INVOLVED IN: regulation of transcription; LOCATED IN: nucleus; EXPRESSED IN: 16 plant structures; EXPRESSED DURING: 9 growth stages; CONTAINS InterPro DOMAIN/s: Homeodomain-like (InterPro:IPR009057), Myb, DNA-binding (InterPro:IPR014778), Myb-like DNA-b…	-0.911375
27.3.25	RNA.regulation of transcription.MYB domain transcription factor family	medtr1g076150.1	Transcript	(at2g31180 : 219.0) Member of the R2R3 factor gene family.; myb domain protein 14 (MYB14); CONTAINS InterPro DOMAIN/s: SANT, DNA-binding (InterPro:IPR001005), Homeodomain-like (InterPro:IPR009057), Myb, DNA-binding (InterPro:IPR014778), HTH transcriptional regulator, Myb-type, DNA-binding (InterPro:IPR017930), Homeodomain-related (InterPro:IPR012287), Myb transcription factor (InterPro:IPR015495)…	-1.53965
27.3.25	RNA.regulation of transcription.MYB domain transcription factor family	medtr3g039990.1	Transcript	(at5g62470 : 298.0) Encodes a R2R3 type Myb transcription factor whose expression is strongly induced by abscisic acid. Mediates abscisic acid signaling during drought stress response.; myb domain protein 96 (MYB96); CONTAINS InterPro DOMAIN/s: SANT, DNA-binding (InterPro:IPR001005), Homeodomain-like (InterPro:IPR009057), Myb, DNA-binding (InterPro:IPR014778), HTH transcriptional regulator, Myb-t…	1.72566
27.3.25	RNA.regulation of transcription.MYB domain transcription factor family	medtr4g102380.1	Transcript	(q50ex6|odo1_pethy : 290.0) ODORANT1 protein (MYB-like protein ODO1) - Petunia hybrida (Petunia) & (at4g12350 : 273.0) Encodes a putative transcription factor (MYB42).; myb domain protein 42 (MYB42); CONTAINS InterPro DOMAIN/s: SANT, DNA-binding (InterPro:IPR001005), Homeodomain-like (InterPro:IPR009057), Myb, DNA-binding (InterPro:IPR014778), HTH transcriptional regulator, Myb-type, DNA-binding …	1.48617
27.3.25	RNA.regulation of transcription.MYB domain transcription factor family	medtr5g082910.1	Transcript	(at3g50060 : 156.0) Encodes a member of the R2R3 transcription factor gene family. Expressed in response to potassium deprivation and auxin. Involved in lateral root development. Interacts with ARF7 and regulates the expression of some auxin responsive genes.; myb domain protein 77 (MYB77); CONTAINS InterPro DOMAIN/s: SANT, DNA-binding (InterPro:IPR001005), Homeodomain-like (InterPro:IPR009057), …	2.53138
27.3.25	RNA.regulation of transcription.MYB domain transcription factor family	medtr7g089210.1	Transcript	(at4g39250 : 100.0) RAD-like 1 (RL1); CONTAINS InterPro DOMAIN/s: Molecular chaperone, heat shock protein, Hsp40, DnaJ (InterPro:IPR015609), SANT, DNA-binding (InterPro:IPR001005), Myb, DNA-binding (InterPro:IPR014778), Homeodomain-like (InterPro:IPR009057), SANT, eukarya (InterPro:IPR017884); BEST Arabidopsis thaliana protein match is: Homeodomain-like superfamily protein (TAIR:AT2G21650.1); Has…	-3.23971
27.3.25	RNA.regulation of transcription.MYB domain transcription factor family	medtr7g115530.1	Transcript	(at5g29000 : 220.0) Homeodomain-like superfamily protein; FUNCTIONS IN: DNA binding, sequence-specific DNA binding transcription factor activity; INVOLVED IN: regulation of transcription; LOCATED IN: nucleus; EXPRESSED IN: 16 plant structures; EXPRESSED DURING: 9 growth stages; CONTAINS InterPro DOMAIN/s: Homeodomain-like (InterPro:IPR009057), Myb, DNA-binding (InterPro:IPR014778), Myb-like DNA-b…	-0.911375
27.3.32	RNA.regulation of transcription.WRKY domain transcription factor family	medtr3g095040.1	Transcript	(at5g64810 : 112.0) member of WRKY Transcription Factor; Group II-c; WRKY DNA-binding protein 51 (WRKY51); CONTAINS InterPro DOMAIN/s: DNA-binding WRKY (InterPro:IPR003657); BEST Arabidopsis thaliana protein match is: WRKY DNA-binding protein 50 (TAIR:AT5G26170.1); Has 30201 Blast hits to 17322 proteins in 780 species: Archae - 12; Bacteria - 1396; Metazoa - 17338; Fungi - 3422; Plants - 5037; Vi…	-2.90928
27.3.32	RNA.regulation of transcription.WRKY domain transcription factor family	medtr4g082580.1	Transcript	(at1g13960 : 263.0) Encodes WRKY DNA-binding protein 4 (WRKY4).; WRKY DNA-binding protein 4 (WRKY4); FUNCTIONS IN: DNA binding, sequence-specific DNA binding transcription factor activity; INVOLVED IN: regulation of transcription, DNA-dependent; LOCATED IN: chloroplast; EXPRESSED IN: 22 plant structures; EXPRESSED DURING: 10 growth stages; CONTAINS InterPro DOMAIN/s: DNA-binding WRKY (InterPro:IP…	-1.96708
27.3.32	RNA.regulation of transcription.WRKY domain transcription factor family	medtr5g067700.1	Transcript	(at3g56400 : 114.0) member of WRKY Transcription Factor; Group III. Function as activator of SA-dependent defense genes and a repressor of JA-regulated genes. WRKY70-controlled suppression of JA-signaling is partly executed by NPR1.; WRKY DNA-binding protein 70 (WRKY70); CONTAINS InterPro DOMAIN/s: DNA-binding WRKY (InterPro:IPR003657); BEST Arabidopsis thaliana protein match is: WRKY DNA-binding…	-1.41813
27.3.32	RNA.regulation of transcription.WRKY domain transcription factor family	medtr7g011820.1	Transcript	(at2g03340 : 317.0) Encodes WRKY DNA-binding protein 3 (WRKY3).; WRKY DNA-binding protein 3 (WRKY3); CONTAINS InterPro DOMAIN/s: DNA-binding WRKY (InterPro:IPR003657); BEST Arabidopsis thaliana protein match is: WRKY DNA-binding protein 4 (TAIR:AT1G13960.1); Has 6486 Blast hits to 3819 proteins in 292 species: Archae - 2; Bacteria - 20; Metazoa - 337; Fungi - 90; Plants - 5675; Viruses - 3; Other…	-0.824487
27.3.32	RNA.regulation of transcription.WRKY domain transcription factor family	medtr7g117200.1	Transcript	(at4g11070 : 169.0) member of WRKY Transcription Factor; Group III; WRKY41; FUNCTIONS IN: sequence-specific DNA binding transcription factor activity; INVOLVED IN: regulation of transcription, DNA-dependent, regulation of transcription; CONTAINS InterPro DOMAIN/s: DNA-binding WRKY (InterPro:IPR003657); BEST Arabidopsis thaliana protein match is: WRKY family transcription factor (TAIR:AT4G23810.1)…	-2.80406
27.3.32	RNA.regulation of transcription.WRKY domain transcription factor family	medtr8g099350.1	Transcript	(at4g11070 : 195.0) member of WRKY Transcription Factor; Group III; WRKY41; FUNCTIONS IN: sequence-specific DNA binding transcription factor activity; INVOLVED IN: regulation of transcription, DNA-dependent, regulation of transcription; CONTAINS InterPro DOMAIN/s: DNA-binding WRKY (InterPro:IPR003657); BEST Arabidopsis thaliana protein match is: WRKY family transcription factor (TAIR:AT4G23810.1)…	-2.02864
Signaling-related
30.2	signalling.receptor kinases	medtr5g024780.1	Transcript	(at4g35470 : 624.0) Encodes PIRL4, a member of the Plant Intracellular Ras-group-related LRRs (Leucine rich repeat proteins). PIRLs are a distinct, plant-specific class of intracellular LRRs that likely mediate protein interactions, possibly in the context of signal transduction.; plant intracellular ras group-related LRR 4 (PIRL4); INVOLVED IN: biological_process unknown; LOCATED IN: plasma memb…	1.0775
30.2.1	signalling.receptor kinases.leucine rich repeat I	medtr8g014700.1	Transcript	(at4g29990 : 743.0) Leucine-rich repeat transmembrane protein kinase protein; FUNCTIONS IN: protein serine/threonine kinase activity, protein kinase activity, ATP binding; INVOLVED IN: protein amino acid phosphorylation; LOCATED IN: endomembrane system; EXPRESSED IN: embryo, leaf whorl, root; EXPRESSED DURING: D bilateral stage; CONTAINS InterPro DOMAIN/s: Protein kinase, ATP binding site (InterP…	-2.29195
30.2.1	signalling.receptor kinases.leucine rich repeat I	medtr8g014790.1	Transcript	(at4g29990 : 782.0) Leucine-rich repeat transmembrane protein kinase protein; FUNCTIONS IN: protein serine/threonine kinase activity, protein kinase activity, ATP binding; INVOLVED IN: protein amino acid phosphorylation; LOCATED IN: endomembrane system; EXPRESSED IN: embryo, leaf whorl, root; EXPRESSED DURING: D bilateral stage; CONTAINS InterPro DOMAIN/s: Protein kinase, ATP binding site (InterP…	-2.16987
30.2.1	signalling.receptor kinases.leucine rich repeat I	medtr8g015010.1	Transcript	(at4g29990 : 658.0) Leucine-rich repeat transmembrane protein kinase protein; FUNCTIONS IN: protein serine/threonine kinase activity, protein kinase activity, ATP binding; INVOLVED IN: protein amino acid phosphorylation; LOCATED IN: endomembrane system; EXPRESSED IN: embryo, leaf whorl, root; EXPRESSED DURING: D bilateral stage; CONTAINS InterPro DOMAIN/s: Protein kinase, ATP binding site (InterP…	-1.63556
30.2.1	signalling.receptor kinases.leucine rich repeat I	medtr8g015040.1	Transcript	(at4g29990 : 664.0) Leucine-rich repeat transmembrane protein kinase protein; FUNCTIONS IN: protein serine/threonine kinase activity, protein kinase activity, ATP binding; INVOLVED IN: protein amino acid phosphorylation; LOCATED IN: endomembrane system; EXPRESSED IN: embryo, leaf whorl, root; EXPRESSED DURING: D bilateral stage; CONTAINS InterPro DOMAIN/s: Protein kinase, ATP binding site (InterP…	-1.29855
30.2.1	signalling.receptor kinases.leucine rich repeat I	medtr8g015100.1	Transcript	(at2g28970 : 494.0) Leucine-rich repeat protein kinase family protein; FUNCTIONS IN: protein serine/threonine kinase activity, kinase activity, ATP binding; INVOLVED IN: transmembrane receptor protein tyrosine kinase signaling pathway, protein amino acid phosphorylation; LOCATED IN: endomembrane system; EXPRESSED IN: root; CONTAINS InterPro DOMAIN/s: Protein kinase, ATP binding site (InterPro:IPR…	-1.61018
30.2.1	signalling.receptor kinases.leucine rich repeat I	medtr8g015200.1	Transcript	(at4g29990 : 735.0) Leucine-rich repeat transmembrane protein kinase protein; FUNCTIONS IN: protein serine/threonine kinase activity, protein kinase activity, ATP binding; INVOLVED IN: protein amino acid phosphorylation; LOCATED IN: endomembrane system; EXPRESSED IN: embryo, leaf whorl, root; EXPRESSED DURING: D bilateral stage; CONTAINS InterPro DOMAIN/s: Protein kinase, ATP binding site (InterP…	-2.48452
30.2.3	signalling.receptor kinases.leucine rich repeat III	medtr8g101260.1	Transcript	(at5g35390 : 608.0) Encodes a member of the receptor-like kinase family of genes. In pollen tubes, it accumulates in the plasma membrane of the apical growing tip through the process of exocytosis.; Leucine-rich repeat protein kinase family protein; FUNCTIONS IN: protein serine/threonine kinase activity, kinase activity, ATP binding; INVOLVED IN: transmembrane receptor protein tyrosine kinase sig…	1.54653
30.2.3	signalling.receptor kinases.leucine rich repeat III	medtr8g107470.1	Transcript	(at1g48480 : 714.0) Arabidopsis thaliana receptor-like protein kinase (RKL1) gene; receptor-like kinase 1 (RKL1); FUNCTIONS IN: protein serine/threonine kinase activity, kinase activity, ATP binding; INVOLVED IN: transmembrane receptor protein tyrosine kinase signaling pathway, protein amino acid phosphorylation; LOCATED IN: plasma membrane; EXPRESSED IN: 23 plant structures; EXPRESSED DURING: 13…	0.718066
30.2.5	signalling.receptor kinases.leucine rich repeat V	medtr2g090120.1	Transcript	(at4g03390 : 780.0) STRUBBELIG-receptor family 3 (SRF3); FUNCTIONS IN: protein serine/threonine kinase activity, kinase activity, ATP binding; INVOLVED IN: transmembrane receptor protein tyrosine kinase signaling pathway, protein amino acid phosphorylation; LOCATED IN: plasma membrane; EXPRESSED IN: 23 plant structures; EXPRESSED DURING: 13 growth stages; CONTAINS InterPro DOMAIN/s: Protein kinas…	1.01246
30.2.5	signalling.receptor kinases.leucine rich repeat V	medtr8g023560.1	Transcript	(at1g53730 : 769.0) STRUBBELIG-receptor family 6 (SRF6); FUNCTIONS IN: protein serine/threonine kinase activity, protein kinase activity, ATP binding; INVOLVED IN: transmembrane receptor protein tyrosine kinase signaling pathway, protein amino acid phosphorylation; LOCATED IN: plasma membrane; EXPRESSED IN: 22 plant structures; EXPRESSED DURING: 13 growth stages; CONTAINS InterPro DOMAIN/s: Prote…	0.826165
30.2.8.1	signalling.receptor kinases.leucine rich repeat VIII.VIII-1	medtr8g070880.1	Transcript	(at1g79620 : 1387.0) Leucine-rich repeat protein kinase family protein; FUNCTIONS IN: protein serine/threonine kinase activity, kinase activity, ATP binding; INVOLVED IN: transmembrane receptor protein tyrosine kinase signaling pathway, protein amino acid phosphorylation; LOCATED IN: endomembrane system; EXPRESSED IN: 8 plant structures; EXPRESSED DURING: 4 anthesis, petal differentiation and exp…	-1.10448
30.2.8.1	signalling.receptor kinases.leucine rich repeat VIII.VIII-1	medtr8g070890.1	Transcript	(at1g79620 : 401.0) Leucine-rich repeat protein kinase family protein; FUNCTIONS IN: protein serine/threonine kinase activity, kinase activity, ATP binding; INVOLVED IN: transmembrane receptor protein tyrosine kinase signaling pathway, protein amino acid phosphorylation; LOCATED IN: endomembrane system; EXPRESSED IN: 8 plant structures; EXPRESSED DURING: 4 anthesis, petal differentiation and expa…	-0.698602
30.2.8.1	signalling.receptor kinases.leucine rich repeat VIII.VIII-1	medtr8g070910.1	Transcript	(at1g79620 : 837.0) Leucine-rich repeat protein kinase family protein; FUNCTIONS IN: protein serine/threonine kinase activity, kinase activity, ATP binding; INVOLVED IN: transmembrane receptor protein tyrosine kinase signaling pathway, protein amino acid phosphorylation; LOCATED IN: endomembrane system; EXPRESSED IN: 8 plant structures; EXPRESSED DURING: 4 anthesis, petal differentiation and expa…	-0.636349
30.2.8.2	signalling.receptor kinases.leucine rich repeat VIII.VIII-2	medtr2g013210.1	Transcript	(at3g09010 : 404.0) Protein kinase superfamily protein; FUNCTIONS IN: protein serine/threonine kinase activity, protein kinase activity, kinase activity, ATP binding; INVOLVED IN: protein amino acid phosphorylation; LOCATED IN: cellular_component unknown; EXPRESSED IN: 20 plant structures; EXPRESSED DURING: 12 growth stages; CONTAINS InterPro DOMAIN/s: Protein kinase, ATP binding site (InterPro:I…	-1.5257
30.2.8.2	signalling.receptor kinases.leucine rich repeat VIII.VIII-2	medtr2g073520.1	Transcript	(at3g14840 : 990.0) Leucine-rich repeat transmembrane protein kinase; FUNCTIONS IN: protein serine/threonine kinase activity, protein kinase activity, ATP binding; INVOLVED IN: protein amino acid phosphorylation; LOCATED IN: plasma membrane; EXPRESSED IN: 25 plant structures; EXPRESSED DURING: 14 growth stages; CONTAINS InterPro DOMAIN/s: Malectin/receptor-like protein kinase (InterPro:IPR021720)…	-1.14462
30.2.8.2	signalling.receptor kinases.leucine rich repeat VIII.VIII-2	medtr2g073540.1	Transcript	(at3g14840 : 811.0) Leucine-rich repeat transmembrane protein kinase; FUNCTIONS IN: protein serine/threonine kinase activity, protein kinase activity, ATP binding; INVOLVED IN: protein amino acid phosphorylation; LOCATED IN: plasma membrane; EXPRESSED IN: 25 plant structures; EXPRESSED DURING: 14 growth stages; CONTAINS InterPro DOMAIN/s: Malectin/receptor-like protein kinase (InterPro:IPR021720)…	-1.04492
30.2.8.2	signalling.receptor kinases.leucine rich repeat VIII.VIII-2	medtr2g073650.1	Transcript	(at3g14840 : 1005.0) Leucine-rich repeat transmembrane protein kinase; FUNCTIONS IN: protein serine/threonine kinase activity, protein kinase activity, ATP binding; INVOLVED IN: protein amino acid phosphorylation; LOCATED IN: plasma membrane; EXPRESSED IN: 25 plant structures; EXPRESSED DURING: 14 growth stages; CONTAINS InterPro DOMAIN/s: Malectin/receptor-like protein kinase (InterPro:IPR021720…	-1.36675
30.2.8.2	signalling.receptor kinases.leucine rich repeat VIII.VIII-2	medtr2g074980.1	Transcript	(at3g14840 : 912.0) Leucine-rich repeat transmembrane protein kinase; FUNCTIONS IN: protein serine/threonine kinase activity, protein kinase activity, ATP binding; INVOLVED IN: protein amino acid phosphorylation; LOCATED IN: plasma membrane; EXPRESSED IN: 25 plant structures; EXPRESSED DURING: 14 growth stages; CONTAINS InterPro DOMAIN/s: Malectin/receptor-like protein kinase (InterPro:IPR021720)…	-1.88495
30.2.8.2	signalling.receptor kinases.leucine rich repeat VIII.VIII-2	medtr2g075010.1	Transcript	(at3g14840 : 1023.0) Leucine-rich repeat transmembrane protein kinase; FUNCTIONS IN: protein serine/threonine kinase activity, protein kinase activity, ATP binding; INVOLVED IN: protein amino acid phosphorylation; LOCATED IN: plasma membrane; EXPRESSED IN: 25 plant structures; EXPRESSED DURING: 14 growth stages; CONTAINS InterPro DOMAIN/s: Malectin/receptor-like protein kinase (InterPro:IPR021720…	-1.4824
30.2.8.2	signalling.receptor kinases.leucine rich repeat VIII.VIII-2	medtr7g068190.1	Transcript	(at3g09010 : 455.0) Protein kinase superfamily protein; FUNCTIONS IN: protein serine/threonine kinase activity, protein kinase activity, kinase activity, ATP binding; INVOLVED IN: protein amino acid phosphorylation; LOCATED IN: cellular_component unknown; EXPRESSED IN: 20 plant structures; EXPRESSED DURING: 12 growth stages; CONTAINS InterPro DOMAIN/s: Protein kinase, ATP binding site (InterPro:I…	-1.61047
30.2.9	signalling.receptor kinases.leucine rich repeat IX	medtr3g084510.1	Transcript	(at2g01820 : 833.0) Leucine-rich repeat protein kinase family protein; FUNCTIONS IN: protein serine/threonine kinase activity, protein kinase activity, ATP binding; INVOLVED IN: pollen development; LOCATED IN: plasma membrane, plant-type cell wall; EXPRESSED IN: 23 plant structures; EXPRESSED DURING: 13 growth stages; CONTAINS InterPro DOMAIN/s: Protein kinase, ATP binding site (InterPro:IPR01744…	0.565976
30.2.9	signalling.receptor kinases.leucine rich repeat IX	medtr7g106210.1	Transcript	(at2g01820 : 696.0) Leucine-rich repeat protein kinase family protein; FUNCTIONS IN: protein serine/threonine kinase activity, protein kinase activity, ATP binding; INVOLVED IN: pollen development; LOCATED IN: plasma membrane, plant-type cell wall; EXPRESSED IN: 23 plant structures; EXPRESSED DURING: 13 growth stages; CONTAINS InterPro DOMAIN/s: Protein kinase, ATP binding site (InterPro:IPR01744…	1.28595
30.2.11	signalling.receptor kinases.leucine rich repeat XI	medtr1g069470.1	Transcript	(at4g28650 : 1269.0) Leucine-rich repeat transmembrane protein kinase family protein; FUNCTIONS IN: protein serine/threonine kinase activity, protein kinase activity, ATP binding; INVOLVED IN: transmembrane receptor protein tyrosine kinase signaling pathway, protein amino acid phosphorylation; LOCATED IN: endomembrane system; EXPRESSED IN: hypocotyl, root, guard cell; CONTAINS InterPro DOMAIN/s: …	2.70652
30.2.11	signalling.receptor kinases.leucine rich repeat XI	medtr2g064580.1	Transcript	(at5g25910 : 188.0) putative disease resistance protein induced by chitin oligomers.; receptor like protein 52 (RLP52); FUNCTIONS IN: kinase activity; INVOLVED IN: signal transduction, defense response to fungus, response to chitin, defense response; LOCATED IN: endomembrane system; EXPRESSED IN: stem, stamen; EXPRESSED DURING: 4 anthesis; CONTAINS InterPro DOMAIN/s: Leucine-rich repeat-containin…	-3.6385
30.2.11	signalling.receptor kinases.leucine rich repeat XI	medtr3g452750.1	Transcript	(at2g34930 : 300.0) disease resistance family protein / LRR family protein; INVOLVED IN: signal transduction, defense response to fungus, defense response; LOCATED IN: cell wall; EXPRESSED IN: 10 plant structures; EXPRESSED DURING: 7 growth stages; CONTAINS InterPro DOMAIN/s: Leucine-rich repeat-containing N-terminal domain, type 2 (InterPro:IPR013210), Leucine-rich repeat (InterPro:IPR001611); B…	-1.35733
30.2.11	signalling.receptor kinases.leucine rich repeat XI	medtr3g075440.1	Transcript	(at2g31880 : 724.0) Encodes a putative leucine rich repeat transmembrane protein that is expressed in response to Pseudomonas syringae. Expression of SRRLK may be required for silencing via lsiRNAs. Regulates cell death and innate immunity.; SUPPRESSOR OF BIR1 1 (SOBIR1); FUNCTIONS IN: protein serine/threonine kinase activity, kinase activity, ATP binding; INVOLVED IN: protein amino acid phosphor…	-1.64051
30.2.11	signalling.receptor kinases.leucine rich repeat XI	medtr6g088790.1	Transcript	(at5g25930 : 925.0) Protein kinase family protein with leucine-rich repeat domain; FUNCTIONS IN: kinase activity; INVOLVED IN: protein amino acid phosphorylation; LOCATED IN: plasma membrane, membrane; EXPRESSED IN: 23 plant structures; EXPRESSED DURING: 14 growth stages; CONTAINS InterPro DOMAIN/s: Protein kinase, ATP binding site (InterPro:IPR017441), Protein kinase, catalytic domain (InterPro:…	-0.647939
30.2.11	signalling.receptor kinases.leucine rich repeat XI	medtr8g465340.1	Transcript	(at4g20140 : 497.0) Encodes GASSHO1 (GSO1), a putative leucine-rich repeat transmembrane-type receptor kinase. GSO1 and a homolog GSO2 (At5g44700) are required for the formation of a normal epidermal surface during embryogenesis.; GASSHO1 (GSO1); FUNCTIONS IN: protein serine/threonine kinase activity, protein kinase activity, ATP binding; INVOLVED IN: protein amino acid phosphorylation, transmemb…	-1.14748
30.2.11	signalling.receptor kinases.leucine rich repeat XI	medtr8g469690.1	Transcript	(at5g44700 : 230.0) Encodes GASSHO2 (GSO2), a putative leucine-rich repeat transmembrane-type receptor kinase. GSO2 and a homolog GSO1 (At4g20140) are required for the formation of a normal epidermal surface during embryogenesis.; GASSHO 2 (GSO2); FUNCTIONS IN: protein serine/threonine kinase activity, protein kinase activity, ATP binding; INVOLVED IN: protein amino acid phosphorylation, transmem…	-0.979615
30.2.11	signalling.receptor kinases.leucine rich repeat XI	medtr8g470380.1	Transcript	(at3g49670 : 160.0) Encodes a CLAVATA1-related receptor kinase-like protein required for both shoot and flower meristem function. Very similar to BAM1,with more than 85% a.a. identity. It has a broad expression pattern and is involved in vascular strand development in the leaf, control of leaf shape, size and symmetry, male gametophyte development and ovule specification and function. Anthers of …	-2.34731
30.2.11	signalling.receptor kinases.leucine rich repeat XI	medtr0830s0010.1	Transcript	(at5g46330 : 374.0) Encodes a leucine-rich repeat serine/threonine protein kinase that is expressed ubiquitously. FLS2 is involved in MAP kinase signalling relay involved in innate immunity. Essential in the perception of flagellin, a potent elicitor of the defense response. FLS2 is directed for degradation by the bacterial ubiquitin ligase AvrPtoB.; FLAGELLIN-SENSITIVE 2 (FLS2); FUNCTIONS IN: pr…	-1.48107
30.2.12	signalling.receptor kinases.leucine rich repeat XII	medtr1g029950.1	Transcript	(at3g47570 : 367.0) Leucine-rich repeat protein kinase family protein; FUNCTIONS IN: protein serine/threonine kinase activity, kinase activity, ATP binding; INVOLVED IN: transmembrane receptor protein tyrosine kinase signaling pathway, protein amino acid phosphorylation; LOCATED IN: plasma membrane; EXPRESSED IN: 13 plant structures; EXPRESSED DURING: 8 growth stages; CONTAINS InterPro DOMAIN/s: …	-1.64623
30.2.12	signalling.receptor kinases.leucine rich repeat XII	medtr1g040525.1	Transcript	(at4g08850 : 590.0) Leucine-rich repeat receptor-like protein kinase family protein; FUNCTIONS IN: kinase activity; INVOLVED IN: protein amino acid phosphorylation; LOCATED IN: plasma membrane, membrane; EXPRESSED IN: 23 plant structures; EXPRESSED DURING: 13 growth stages; CONTAINS InterPro DOMAIN/s: Protein kinase, ATP binding site (InterPro:IPR017441), Protein kinase, catalytic domain (InterPr…	-1.16215
30.2.12	signalling.receptor kinases.leucine rich repeat XII	medtr1g040545.1	Transcript	(at4g08850 : 767.0) Leucine-rich repeat receptor-like protein kinase family protein; FUNCTIONS IN: kinase activity; INVOLVED IN: protein amino acid phosphorylation; LOCATED IN: plasma membrane, membrane; EXPRESSED IN: 23 plant structures; EXPRESSED DURING: 13 growth stages; CONTAINS InterPro DOMAIN/s: Protein kinase, ATP binding site (InterPro:IPR017441), Protein kinase, catalytic domain (InterPr…	-1.42335
30.2.12	signalling.receptor kinases.leucine rich repeat XII	medtr1g040555.1	Transcript	(at4g08850 : 568.0) Leucine-rich repeat receptor-like protein kinase family protein; FUNCTIONS IN: kinase activity; INVOLVED IN: protein amino acid phosphorylation; LOCATED IN: plasma membrane, membrane; EXPRESSED IN: 23 plant structures; EXPRESSED DURING: 13 growth stages; CONTAINS InterPro DOMAIN/s: Protein kinase, ATP binding site (InterPro:IPR017441), Protein kinase, catalytic domain (InterPr…	-1.37313
30.2.12	signalling.receptor kinases.leucine rich repeat XII	medtr1g040615.1	Transcript	(at1g35710 : 798.0) Protein kinase family protein with leucine-rich repeat domain; FUNCTIONS IN: protein serine/threonine kinase activity, protein tyrosine kinase activity, protein kinase activity, ATP binding; INVOLVED IN: transmembrane receptor protein tyrosine kinase signaling pathway, protein amino acid phosphorylation; LOCATED IN: endomembrane system; EXPRESSED IN: 22 plant structures; EXPRE…	-1.44607
30.2.12	signalling.receptor kinases.leucine rich repeat XII	medtr1g040625.1	Transcript	(at4g08850 : 228.0) Leucine-rich repeat receptor-like protein kinase family protein; FUNCTIONS IN: kinase activity; INVOLVED IN: protein amino acid phosphorylation; LOCATED IN: plasma membrane, membrane; EXPRESSED IN: 23 plant structures; EXPRESSED DURING: 13 growth stages; CONTAINS InterPro DOMAIN/s: Protein kinase, ATP binding site (InterPro:IPR017441), Protein kinase, catalytic domain (InterPr…	-1.71566
30.2.12	signalling.receptor kinases.leucine rich repeat XII	medtr2g016580.1	Transcript	(at3g47570 : 424.0) Leucine-rich repeat protein kinase family protein; FUNCTIONS IN: protein serine/threonine kinase activity, kinase activity, ATP binding; INVOLVED IN: transmembrane receptor protein tyrosine kinase signaling pathway, protein amino acid phosphorylation; LOCATED IN: plasma membrane; EXPRESSED IN: 13 plant structures; EXPRESSED DURING: 8 growth stages; CONTAINS InterPro DOMAIN/s: …	-2.98894
30.2.12	signalling.receptor kinases.leucine rich repeat XII	medtr2g040910.1	Transcript	(at3g47570 : 786.0) Leucine-rich repeat protein kinase family protein; FUNCTIONS IN: protein serine/threonine kinase activity, kinase activity, ATP binding; INVOLVED IN: transmembrane receptor protein tyrosine kinase signaling pathway, protein amino acid phosphorylation; LOCATED IN: plasma membrane; EXPRESSED IN: 13 plant structures; EXPRESSED DURING: 8 growth stages; CONTAINS InterPro DOMAIN/s: …	-1.84378
30.2.12	signalling.receptor kinases.leucine rich repeat XII	medtr4g011310.1	Transcript	(at2g34930 : 223.0) disease resistance family protein / LRR family protein; INVOLVED IN: signal transduction, defense response to fungus, defense response; LOCATED IN: cell wall; EXPRESSED IN: 10 plant structures; EXPRESSED DURING: 7 growth stages; CONTAINS InterPro DOMAIN/s: Leucine-rich repeat-containing N-terminal domain, type 2 (InterPro:IPR013210), Leucine-rich repeat (InterPro:IPR001611); B…	-1.28856
30.2.12	signalling.receptor kinases.leucine rich repeat XII	medtr4g094610.1	Transcript	(at5g46330 : 974.0) Encodes a leucine-rich repeat serine/threonine protein kinase that is expressed ubiquitously. FLS2 is involved in MAP kinase signalling relay involved in innate immunity. Essential in the perception of flagellin, a potent elicitor of the defense response. FLS2 is directed for degradation by the bacterial ubiquitin ligase AvrPtoB.; FLAGELLIN-SENSITIVE 2 (FLS2); FUNCTIONS IN: pr…	-2.76673
30.2.12	signalling.receptor kinases.leucine rich repeat XII	medtr5g024450.1	Transcript	(at3g47570 : 752.0) Leucine-rich repeat protein kinase family protein; FUNCTIONS IN: protein serine/threonine kinase activity, kinase activity, ATP binding; INVOLVED IN: transmembrane receptor protein tyrosine kinase signaling pathway, protein amino acid phosphorylation; LOCATED IN: plasma membrane; EXPRESSED IN: 13 plant structures; EXPRESSED DURING: 8 growth stages; CONTAINS InterPro DOMAIN/s: …	-1.88608
30.2.12	signalling.receptor kinases.leucine rich repeat XII	medtr5g025860.1	Transcript	(at3g47570 : 779.0) Leucine-rich repeat protein kinase family protein; FUNCTIONS IN: protein serine/threonine kinase activity, kinase activity, ATP binding; INVOLVED IN: transmembrane receptor protein tyrosine kinase signaling pathway, protein amino acid phosphorylation; LOCATED IN: plasma membrane; EXPRESSED IN: 13 plant structures; EXPRESSED DURING: 8 growth stages; CONTAINS InterPro DOMAIN/s: …	-1.66571
30.2.12	signalling.receptor kinases.leucine rich repeat XII	medtr5g026150.1	Transcript	(at3g47570 : 726.0) Leucine-rich repeat protein kinase family protein; FUNCTIONS IN: protein serine/threonine kinase activity, kinase activity, ATP binding; INVOLVED IN: transmembrane receptor protein tyrosine kinase signaling pathway, protein amino acid phosphorylation; LOCATED IN: plasma membrane; EXPRESSED IN: 13 plant structures; EXPRESSED DURING: 8 growth stages; CONTAINS InterPro DOMAIN/s: …	-1.69875
30.2.12	signalling.receptor kinases.leucine rich repeat XII	medtr5g026200.1	Transcript	(at3g47570 : 584.0) Leucine-rich repeat protein kinase family protein; FUNCTIONS IN: protein serine/threonine kinase activity, kinase activity, ATP binding; INVOLVED IN: transmembrane receptor protein tyrosine kinase signaling pathway, protein amino acid phosphorylation; LOCATED IN: plasma membrane; EXPRESSED IN: 13 plant structures; EXPRESSED DURING: 8 growth stages; CONTAINS InterPro DOMAIN/s: …	-1.56987
30.2.12	signalling.receptor kinases.leucine rich repeat XII	medtr5g082270.1	Transcript	(at3g47570 : 691.0) Leucine-rich repeat protein kinase family protein; FUNCTIONS IN: protein serine/threonine kinase activity, kinase activity, ATP binding; INVOLVED IN: transmembrane receptor protein tyrosine kinase signaling pathway, protein amino acid phosphorylation; LOCATED IN: plasma membrane; EXPRESSED IN: 13 plant structures; EXPRESSED DURING: 8 growth stages; CONTAINS InterPro DOMAIN/s: …	-1.71662
30.2.12	signalling.receptor kinases.leucine rich repeat XII	medtr6g036780.1	Transcript	(at3g47570 : 714.0) Leucine-rich repeat protein kinase family protein; FUNCTIONS IN: protein serine/threonine kinase activity, kinase activity, ATP binding; INVOLVED IN: transmembrane receptor protein tyrosine kinase signaling pathway, protein amino acid phosphorylation; LOCATED IN: plasma membrane; EXPRESSED IN: 13 plant structures; EXPRESSED DURING: 8 growth stages; CONTAINS InterPro DOMAIN/s: …	-1.82023
30.2.12	signalling.receptor kinases.leucine rich repeat XII	medtr6g036790.1	Transcript	(at3g47570 : 744.0) Leucine-rich repeat protein kinase family protein; FUNCTIONS IN: protein serine/threonine kinase activity, kinase activity, ATP binding; INVOLVED IN: transmembrane receptor protein tyrosine kinase signaling pathway, protein amino acid phosphorylation; LOCATED IN: plasma membrane; EXPRESSED IN: 13 plant structures; EXPRESSED DURING: 8 growth stages; CONTAINS InterPro DOMAIN/s: …	-1.88098
30.2.12	signalling.receptor kinases.leucine rich repeat XII	medtr6g036840.1	Transcript	(at3g47570 : 776.0) Leucine-rich repeat protein kinase family protein; FUNCTIONS IN: protein serine/threonine kinase activity, kinase activity, ATP binding; INVOLVED IN: transmembrane receptor protein tyrosine kinase signaling pathway, protein amino acid phosphorylation; LOCATED IN: plasma membrane; EXPRESSED IN: 13 plant structures; EXPRESSED DURING: 8 growth stages; CONTAINS InterPro DOMAIN/s: …	-2.03463
30.2.12	signalling.receptor kinases.leucine rich repeat XII	medtr6g036870.1	Transcript	(at3g47570 : 674.0) Leucine-rich repeat protein kinase family protein; FUNCTIONS IN: protein serine/threonine kinase activity, kinase activity, ATP binding; INVOLVED IN: transmembrane receptor protein tyrosine kinase signaling pathway, protein amino acid phosphorylation; LOCATED IN: plasma membrane; EXPRESSED IN: 13 plant structures; EXPRESSED DURING: 8 growth stages; CONTAINS InterPro DOMAIN/s: …	-2.01749
30.2.12	signalling.receptor kinases.leucine rich repeat XII	medtr6g036890.1	Transcript	(at3g47570 : 784.0) Leucine-rich repeat protein kinase family protein; FUNCTIONS IN: protein serine/threonine kinase activity, kinase activity, ATP binding; INVOLVED IN: transmembrane receptor protein tyrosine kinase signaling pathway, protein amino acid phosphorylation; LOCATED IN: plasma membrane; EXPRESSED IN: 13 plant structures; EXPRESSED DURING: 8 growth stages; CONTAINS InterPro DOMAIN/s: …	-2.1114
30.2.12	signalling.receptor kinases.leucine rich repeat XII	medtr6g040210.1	Transcript	(at3g47570 : 493.0) Leucine-rich repeat protein kinase family protein; FUNCTIONS IN: protein serine/threonine kinase activity, kinase activity, ATP binding; INVOLVED IN: transmembrane receptor protein tyrosine kinase signaling pathway, protein amino acid phosphorylation; LOCATED IN: plasma membrane; EXPRESSED IN: 13 plant structures; EXPRESSED DURING: 8 growth stages; CONTAINS InterPro DOMAIN/s: …	-2.40722
30.2.12	signalling.receptor kinases.leucine rich repeat XII	medtr7g407090.1	Transcript	(at4g08850 : 426.0) Leucine-rich repeat receptor-like protein kinase family protein; FUNCTIONS IN: kinase activity; INVOLVED IN: protein amino acid phosphorylation; LOCATED IN: plasma membrane, membrane; EXPRESSED IN: 23 plant structures; EXPRESSED DURING: 13 growth stages; CONTAINS InterPro DOMAIN/s: Protein kinase, ATP binding site (InterPro:IPR017441), Protein kinase, catalytic domain (InterPr…	-1.44207
30.2.12	signalling.receptor kinases.leucine rich repeat XII	medtr7g007550.1	Transcript	(at4g08850 : 281.0) Leucine-rich repeat receptor-like protein kinase family protein; FUNCTIONS IN: kinase activity; INVOLVED IN: protein amino acid phosphorylation; LOCATED IN: plasma membrane, membrane; EXPRESSED IN: 23 plant structures; EXPRESSED DURING: 13 growth stages; CONTAINS InterPro DOMAIN/s: Protein kinase, ATP binding site (InterPro:IPR017441), Protein kinase, catalytic domain (InterPr…	-1.3409
30.2.12	signalling.receptor kinases.leucine rich repeat XII	medtr7g007630.1	Transcript	(at4g08850 : 405.0) Leucine-rich repeat receptor-like protein kinase family protein; FUNCTIONS IN: kinase activity; INVOLVED IN: protein amino acid phosphorylation; LOCATED IN: plasma membrane, membrane; EXPRESSED IN: 23 plant structures; EXPRESSED DURING: 13 growth stages; CONTAINS InterPro DOMAIN/s: Protein kinase, ATP binding site (InterPro:IPR017441), Protein kinase, catalytic domain (InterPr…	-1.08795
30.2.12	signalling.receptor kinases.leucine rich repeat XII	medtr8g047160.1	Transcript	(at4g08850 : 376.0) Leucine-rich repeat receptor-like protein kinase family protein; FUNCTIONS IN: kinase activity; INVOLVED IN: protein amino acid phosphorylation; LOCATED IN: plasma membrane, membrane; EXPRESSED IN: 23 plant structures; EXPRESSED DURING: 13 growth stages; CONTAINS InterPro DOMAIN/s: Protein kinase, ATP binding site (InterPro:IPR017441), Protein kinase, catalytic domain (InterPr…	-1.39394
30.2.12	signalling.receptor kinases.leucine rich repeat XII	medtr8g047210.1	Transcript	(at4g08850 : 480.0) Leucine-rich repeat receptor-like protein kinase family protein; FUNCTIONS IN: kinase activity; INVOLVED IN: protein amino acid phosphorylation; LOCATED IN: plasma membrane, membrane; EXPRESSED IN: 23 plant structures; EXPRESSED DURING: 13 growth stages; CONTAINS InterPro DOMAIN/s: Protein kinase, ATP binding site (InterPro:IPR017441), Protein kinase, catalytic domain (InterPr…	-1.32368
30.2.12	signalling.receptor kinases.leucine rich repeat XII	medtr8g047230.1	Transcript	(at4g08850 : 545.0) Leucine-rich repeat receptor-like protein kinase family protein; FUNCTIONS IN: kinase activity; INVOLVED IN: protein amino acid phosphorylation; LOCATED IN: plasma membrane, membrane; EXPRESSED IN: 23 plant structures; EXPRESSED DURING: 13 growth stages; CONTAINS InterPro DOMAIN/s: Protein kinase, ATP binding site (InterPro:IPR017441), Protein kinase, catalytic domain (InterPr…	-1.13609
30.2.12	signalling.receptor kinases.leucine rich repeat XII	medtr8g465340.1	Transcript	(at4g20140 : 497.0) Encodes GASSHO1 (GSO1), a putative leucine-rich repeat transmembrane-type receptor kinase. GSO1 and a homolog GSO2 (At5g44700) are required for the formation of a normal epidermal surface during embryogenesis.; GASSHO1 (GSO1); FUNCTIONS IN: protein serine/threonine kinase activity, protein kinase activity, ATP binding; INVOLVED IN: protein amino acid phosphorylation, transmemb…	-1.14748
30.2.12	signalling.receptor kinases.leucine rich repeat XII	medtr8g468620.1	Transcript	(at3g47570 : 310.0) Leucine-rich repeat protein kinase family protein; FUNCTIONS IN: protein serine/threonine kinase activity, kinase activity, ATP binding; INVOLVED IN: transmembrane receptor protein tyrosine kinase signaling pathway, protein amino acid phosphorylation; LOCATED IN: plasma membrane; EXPRESSED IN: 13 plant structures; EXPRESSED DURING: 8 growth stages; CONTAINS InterPro DOMAIN/s: …	-1.52084
30.2.12	signalling.receptor kinases.leucine rich repeat XII	medtr8g469650.1	Transcript	(at3g47570 : 396.0) Leucine-rich repeat protein kinase family protein; FUNCTIONS IN: protein serine/threonine kinase activity, kinase activity, ATP binding; INVOLVED IN: transmembrane receptor protein tyrosine kinase signaling pathway, protein amino acid phosphorylation; LOCATED IN: plasma membrane; EXPRESSED IN: 13 plant structures; EXPRESSED DURING: 8 growth stages; CONTAINS InterPro DOMAIN/s: …	-1.27846
30.2.12	signalling.receptor kinases.leucine rich repeat XII	medtr8g469690.1	Transcript	(at5g44700 : 230.0) Encodes GASSHO2 (GSO2), a putative leucine-rich repeat transmembrane-type receptor kinase. GSO2 and a homolog GSO1 (At4g20140) are required for the formation of a normal epidermal surface during embryogenesis.; GASSHO 2 (GSO2); FUNCTIONS IN: protein serine/threonine kinase activity, protein kinase activity, ATP binding; INVOLVED IN: protein amino acid phosphorylation, transmem…	-0.979615
30.2.12	signalling.receptor kinases.leucine rich repeat XII	medtr8g469830.1	Transcript	(at3g47570 : 468.0) Leucine-rich repeat protein kinase family protein; FUNCTIONS IN: protein serine/threonine kinase activity, kinase activity, ATP binding; INVOLVED IN: transmembrane receptor protein tyrosine kinase signaling pathway, protein amino acid phosphorylation; LOCATED IN: plasma membrane; EXPRESSED IN: 13 plant structures; EXPRESSED DURING: 8 growth stages; CONTAINS InterPro DOMAIN/s: …	-1.46234
30.2.12	signalling.receptor kinases.leucine rich repeat XII	medtr8g470380.1	Transcript	(at3g49670 : 160.0) Encodes a CLAVATA1-related receptor kinase-like protein required for both shoot and flower meristem function. Very similar to BAM1,with more than 85% a.a. identity. It has a broad expression pattern and is involved in vascular strand development in the leaf, control of leaf shape, size and symmetry, male gametophyte development and ovule specification and function. Anthers of …	-2.34731
30.2.12	signalling.receptor kinases.leucine rich repeat XII	medtr8g470400.1	Transcript	(at3g47570 : 486.0) Leucine-rich repeat protein kinase family protein; FUNCTIONS IN: protein serine/threonine kinase activity, kinase activity, ATP binding; INVOLVED IN: transmembrane receptor protein tyrosine kinase signaling pathway, protein amino acid phosphorylation; LOCATED IN: plasma membrane; EXPRESSED IN: 13 plant structures; EXPRESSED DURING: 8 growth stages; CONTAINS InterPro DOMAIN/s: …	-1.12235
30.2.12	signalling.receptor kinases.leucine rich repeat XII	medtr8g470560.1	Transcript	(at3g47570 : 417.0) Leucine-rich repeat protein kinase family protein; FUNCTIONS IN: protein serine/threonine kinase activity, kinase activity, ATP binding; INVOLVED IN: transmembrane receptor protein tyrosine kinase signaling pathway, protein amino acid phosphorylation; LOCATED IN: plasma membrane; EXPRESSED IN: 13 plant structures; EXPRESSED DURING: 8 growth stages; CONTAINS InterPro DOMAIN/s: …	-2.10822
30.2.12	signalling.receptor kinases.leucine rich repeat XII	medtr0070s0020.1	Transcript	(at3g47570 : 407.0) Leucine-rich repeat protein kinase family protein; FUNCTIONS IN: protein serine/threonine kinase activity, kinase activity, ATP binding; INVOLVED IN: transmembrane receptor protein tyrosine kinase signaling pathway, protein amino acid phosphorylation; LOCATED IN: plasma membrane; EXPRESSED IN: 13 plant structures; EXPRESSED DURING: 8 growth stages; CONTAINS InterPro DOMAIN/s: …	-1.11751
30.2.12	signalling.receptor kinases.leucine rich repeat XII	medtr0830s0010.1	Transcript	(at5g46330 : 374.0) Encodes a leucine-rich repeat serine/threonine protein kinase that is expressed ubiquitously. FLS2 is involved in MAP kinase signalling relay involved in innate immunity. Essential in the perception of flagellin, a potent elicitor of the defense response. FLS2 is directed for degradation by the bacterial ubiquitin ligase AvrPtoB.; FLAGELLIN-SENSITIVE 2 (FLS2); FUNCTIONS IN: pr…	-1.48107
30.2.13	signalling.receptor kinases.leucine rich repeat XIII	medtr4g107620.1	Transcript	(at5g62710 : 894.0) Leucine-rich repeat protein kinase family protein; FUNCTIONS IN: protein serine/threonine kinase activity, protein kinase activity, ATP binding; INVOLVED IN: protein amino acid phosphorylation; LOCATED IN: endomembrane system; EXPRESSED IN: 21 plant structures; EXPRESSED DURING: 13 growth stages; CONTAINS InterPro DOMAIN/s: Protein kinase, ATP binding site (InterPro:IPR017441)…	2.4251
30.2.14	signalling.receptor kinases.leucine rich repeat XIV	medtr1g022265.1	Transcript	(at2g16250 : 610.0) Leucine-rich repeat protein kinase family protein; FUNCTIONS IN: protein serine/threonine kinase activity, protein kinase activity, ATP binding; INVOLVED IN: transmembrane receptor protein tyrosine kinase signaling pathway, protein amino acid phosphorylation; LOCATED IN: plasma membrane, plant-type cell wall; EXPRESSED IN: 21 plant structures; EXPRESSED DURING: 10 growth stage…	-1.34916
30.2.15	signalling.receptor kinases.thaumatin like	medtr1g026990.1	Transcript	(at4g18250 : 314.0) receptor serine/threonine kinase, putative; FUNCTIONS IN: transmembrane receptor protein serine/threonine kinase activity, kinase activity; INVOLVED IN: protein amino acid phosphorylation; EXPRESSED IN: 8 plant structures; EXPRESSED DURING: LP.06 six leaves visible, LP.04 four leaves visible, LP.10 ten leaves visible, LP.02 two leaves visible, LP.08 eight leaves visible; CONTA…	-2.14238
30.2.15	signalling.receptor kinases.thaumatin like	medtr1g108910.1	Transcript	(at1g67000 : 293.0) Protein kinase superfamily protein; FUNCTIONS IN: protein serine/threonine kinase activity, protein kinase activity, kinase activity, ATP binding; INVOLVED IN: protein amino acid phosphorylation; LOCATED IN: endomembrane system; EXPRESSED IN: stem; CONTAINS InterPro DOMAIN/s: Protein kinase, ATP binding site (InterPro:IPR017441), Protein kinase, catalytic domain (InterPro:IPR0…	-1.80668
30.2.15	signalling.receptor kinases.thaumatin like	medtr1g110140.1	Transcript	(at1g67000 : 389.0) Protein kinase superfamily protein; FUNCTIONS IN: protein serine/threonine kinase activity, protein kinase activity, kinase activity, ATP binding; INVOLVED IN: protein amino acid phosphorylation; LOCATED IN: endomembrane system; EXPRESSED IN: stem; CONTAINS InterPro DOMAIN/s: Protein kinase, ATP binding site (InterPro:IPR017441), Protein kinase, catalytic domain (InterPro:IPR0…	-2.42915
30.2.15	signalling.receptor kinases.thaumatin like	medtr1g110220.1	Transcript	(at1g70250 : 323.0) Encodes a Protease inhibitor/seed storage/LTP family protein; receptor serine/threonine kinase, putative; FUNCTIONS IN: protein serine/threonine kinase activity, transmembrane receptor protein serine/threonine kinase activity, protein kinase activity, ATP binding; INVOLVED IN: protein amino acid phosphorylation; LOCATED IN: endomembrane system; EXPRESSED IN: 20 plant structure…	-2.07823
30.2.15	signalling.receptor kinases.thaumatin like	medtr3g028630.1	Transcript	(at5g38280 : 342.0) putative receptor serine/threonine kinase PR5K (PR5K) mRNA, PR5-like receptor kinase; PR5-like receptor kinase (PR5K); FUNCTIONS IN: transmembrane receptor protein serine/threonine kinase activity, kinase activity; INVOLVED IN: response to fungus; LOCATED IN: endomembrane system; EXPRESSED IN: 6 plant structures; EXPRESSED DURING: petal differentiation and expansion stage; CON…	-1.51315
30.2.15	signalling.receptor kinases.thaumatin like	medtr6g082950.1	Transcript	(at1g66980 : 386.0) Encodes SNC4 (suppressor of npr1-1, constitutive 4), an atypical receptor-like kinase with two predicted extracellular glycerophosphoryl diester phosphodiesterase domains.; suppressor of npr1-1 constitutive 4 (SNC4); CONTAINS InterPro DOMAIN/s: Protein kinase, ATP binding site (InterPro:IPR017441), Serine/threonine-protein kinase domain (InterPro:IPR002290), Serine-threonine/t…	-1.89822
30.2.15	signalling.receptor kinases.thaumatin like	medtr6g083780.1	Transcript	(at1g66920 : 417.0) Protein kinase superfamily protein; FUNCTIONS IN: protein serine/threonine kinase activity, protein kinase activity, kinase activity, ATP binding; INVOLVED IN: protein amino acid phosphorylation; LOCATED IN: endomembrane system; CONTAINS InterPro DOMAIN/s: Protein kinase, ATP binding site (InterPro:IPR017441), Serine/threonine-protein kinase domain (InterPro:IPR002290), Serine…	-2.17433
30.2.15	signalling.receptor kinases.thaumatin like	medtr6g083740.1	Transcript	(at1g66910 : 254.0) Protein kinase superfamily protein; FUNCTIONS IN: kinase activity; INVOLVED IN: protein amino acid phosphorylation; LOCATED IN: endomembrane system; CONTAINS InterPro DOMAIN/s: Protein kinase, ATP binding site (InterPro:IPR017441), Serine/threonine-protein kinase domain (InterPro:IPR002290), Serine-threonine/tyrosine-protein kinase (InterPro:IPR001245), Serine/threonine-protei…	-1.39485
30.2.16	signalling.receptor kinases.Catharanthus roseus-like RLK1	medtr1g026990.1	Transcript	(at4g18250 : 314.0) receptor serine/threonine kinase, putative; FUNCTIONS IN: transmembrane receptor protein serine/threonine kinase activity, kinase activity; INVOLVED IN: protein amino acid phosphorylation; EXPRESSED IN: 8 plant structures; EXPRESSED DURING: LP.06 six leaves visible, LP.04 four leaves visible, LP.10 ten leaves visible, LP.02 two leaves visible, LP.08 eight leaves visible; CONTA…	-2.14238
30.2.16	signalling.receptor kinases.Catharanthus roseus-like RLK1	medtr1g108910.1	Transcript	(at1g67000 : 293.0) Protein kinase superfamily protein; FUNCTIONS IN: protein serine/threonine kinase activity, protein kinase activity, kinase activity, ATP binding; INVOLVED IN: protein amino acid phosphorylation; LOCATED IN: endomembrane system; EXPRESSED IN: stem; CONTAINS InterPro DOMAIN/s: Protein kinase, ATP binding site (InterPro:IPR017441), Protein kinase, catalytic domain (InterPro:IPR0…	-1.80668
30.2.16	signalling.receptor kinases.Catharanthus roseus-like RLK1	medtr1g110140.1	Transcript	(at1g67000 : 389.0) Protein kinase superfamily protein; FUNCTIONS IN: protein serine/threonine kinase activity, protein kinase activity, kinase activity, ATP binding; INVOLVED IN: protein amino acid phosphorylation; LOCATED IN: endomembrane system; EXPRESSED IN: stem; CONTAINS InterPro DOMAIN/s: Protein kinase, ATP binding site (InterPro:IPR017441), Protein kinase, catalytic domain (InterPro:IPR0…	-2.42915
30.2.16	signalling.receptor kinases.Catharanthus roseus-like RLK1	medtr1g110220.1	Transcript	(at1g70250 : 323.0) Encodes a Protease inhibitor/seed storage/LTP family protein; receptor serine/threonine kinase, putative; FUNCTIONS IN: protein serine/threonine kinase activity, transmembrane receptor protein serine/threonine kinase activity, protein kinase activity, ATP binding; INVOLVED IN: protein amino acid phosphorylation; LOCATED IN: endomembrane system; EXPRESSED IN: 20 plant structure…	-2.07823
30.2.16	signalling.receptor kinases.Catharanthus roseus-like RLK1	medtr2g096160.1	Transcript	(at3g46290 : 1029.0) Encodes HERCULES1 (HERK1), a receptor kinase regulated by Brassinosteroids and required for cell elongation during vegetative growth.; hercules receptor kinase 1 (HERK1); FUNCTIONS IN: protein kinase activity, kinase activity; INVOLVED IN: brassinosteroid mediated signaling pathway, post-embryonic development, response to brassinosteroid stimulus, unidimensional cell growth, …	0.866678
30.2.16	signalling.receptor kinases.Catharanthus roseus-like RLK1	medtr3g028630.1	Transcript	(at5g38280 : 342.0) putative receptor serine/threonine kinase PR5K (PR5K) mRNA, PR5-like receptor kinase; PR5-like receptor kinase (PR5K); FUNCTIONS IN: transmembrane receptor protein serine/threonine kinase activity, kinase activity; INVOLVED IN: response to fungus; LOCATED IN: endomembrane system; EXPRESSED IN: 6 plant structures; EXPRESSED DURING: petal differentiation and expansion stage; CON…	-1.51315
30.2.16	signalling.receptor kinases.Catharanthus roseus-like RLK1	medtr4g061833.1	Transcript	(at3g46290 : 907.0) Encodes HERCULES1 (HERK1), a receptor kinase regulated by Brassinosteroids and required for cell elongation during vegetative growth.; hercules receptor kinase 1 (HERK1); FUNCTIONS IN: protein kinase activity, kinase activity; INVOLVED IN: brassinosteroid mediated signaling pathway, post-embryonic development, response to brassinosteroid stimulus, unidimensional cell growth, r…	1.10858
30.2.16	signalling.receptor kinases.Catharanthus roseus-like RLK1	medtr4g095012.1	Transcript	(at2g23200 : 556.0) Protein kinase superfamily protein; FUNCTIONS IN: kinase activity; INVOLVED IN: protein amino acid phosphorylation; LOCATED IN: endomembrane system; EXPRESSED IN: 20 plant structures; EXPRESSED DURING: 12 growth stages; CONTAINS InterPro DOMAIN/s: Protein kinase, ATP binding site (InterPro:IPR017441), Protein kinase, catalytic domain (InterPro:IPR000719), Serine-threonine/tyro…	-1.21874
30.2.16	signalling.receptor kinases.Catharanthus roseus-like RLK1	medtr4g095018.1	Transcript	(at2g23200 : 318.0) Protein kinase superfamily protein; FUNCTIONS IN: kinase activity; INVOLVED IN: protein amino acid phosphorylation; LOCATED IN: endomembrane system; EXPRESSED IN: 20 plant structures; EXPRESSED DURING: 12 growth stages; CONTAINS InterPro DOMAIN/s: Protein kinase, ATP binding site (InterPro:IPR017441), Protein kinase, catalytic domain (InterPro:IPR000719), Serine-threonine/tyro…	-1.06296
30.2.16	signalling.receptor kinases.Catharanthus roseus-like RLK1	medtr4g095032.1	Transcript	(at2g23200 : 525.0) Protein kinase superfamily protein; FUNCTIONS IN: kinase activity; INVOLVED IN: protein amino acid phosphorylation; LOCATED IN: endomembrane system; EXPRESSED IN: 20 plant structures; EXPRESSED DURING: 12 growth stages; CONTAINS InterPro DOMAIN/s: Protein kinase, ATP binding site (InterPro:IPR017441), Protein kinase, catalytic domain (InterPro:IPR000719), Serine-threonine/tyro…	-1.69922
30.2.16	signalling.receptor kinases.Catharanthus roseus-like RLK1	medtr4g095042.1	Transcript	(at2g23200 : 521.0) Protein kinase superfamily protein; FUNCTIONS IN: kinase activity; INVOLVED IN: protein amino acid phosphorylation; LOCATED IN: endomembrane system; EXPRESSED IN: 20 plant structures; EXPRESSED DURING: 12 growth stages; CONTAINS InterPro DOMAIN/s: Protein kinase, ATP binding site (InterPro:IPR017441), Protein kinase, catalytic domain (InterPro:IPR000719), Serine-threonine/tyro…	-1.44032
30.2.16	signalling.receptor kinases.Catharanthus roseus-like RLK1	medtr6g082950.1	Transcript	(at1g66980 : 386.0) Encodes SNC4 (suppressor of npr1-1, constitutive 4), an atypical receptor-like kinase with two predicted extracellular glycerophosphoryl diester phosphodiesterase domains.; suppressor of npr1-1 constitutive 4 (SNC4); CONTAINS InterPro DOMAIN/s: Protein kinase, ATP binding site (InterPro:IPR017441), Serine/threonine-protein kinase domain (InterPro:IPR002290), Serine-threonine/t…	-1.89822
30.2.16	signalling.receptor kinases.Catharanthus roseus-like RLK1	medtr6g083740.1	Transcript	(at1g66910 : 254.0) Protein kinase superfamily protein; FUNCTIONS IN: kinase activity; INVOLVED IN: protein amino acid phosphorylation; LOCATED IN: endomembrane system; CONTAINS InterPro DOMAIN/s: Protein kinase, ATP binding site (InterPro:IPR017441), Serine/threonine-protein kinase domain (InterPro:IPR002290), Serine-threonine/tyrosine-protein kinase (InterPro:IPR001245), Serine/threonine-protei…	-1.39485
30.2.16	signalling.receptor kinases.Catharanthus roseus-like RLK1	medtr7g015230.1	Transcript	(at3g51550 : 548.0) Encodes a synergid-expressed, plasma-membrane localized receptor-like kinase that accumulates asymetrically in the synergid membrnane at the filiform apparatus and mediates male-female gametophyte interactions during pollen tube reception.; FERONIA (FER); FUNCTIONS IN: protein kinase activity, kinase activity; INVOLVED IN: pollen tube reception, post-embryonic development, pro…	-2.07018
30.2.16	signalling.receptor kinases.Catharanthus roseus-like RLK1	medtr7g015240.1	Transcript	(at3g51550 : 616.0) Encodes a synergid-expressed, plasma-membrane localized receptor-like kinase that accumulates asymetrically in the synergid membrnane at the filiform apparatus and mediates male-female gametophyte interactions during pollen tube reception.; FERONIA (FER); FUNCTIONS IN: protein kinase activity, kinase activity; INVOLVED IN: pollen tube reception, post-embryonic development, pro…	-1.24713
30.2.16	signalling.receptor kinases.Catharanthus roseus-like RLK1	medtr7g015250.1	Transcript	(at3g51550 : 600.0) Encodes a synergid-expressed, plasma-membrane localized receptor-like kinase that accumulates asymetrically in the synergid membrnane at the filiform apparatus and mediates male-female gametophyte interactions during pollen tube reception.; FERONIA (FER); FUNCTIONS IN: protein kinase activity, kinase activity; INVOLVED IN: pollen tube reception, post-embryonic development, pro…	-1.81468
30.2.16	signalling.receptor kinases.Catharanthus roseus-like RLK1	medtr7g015280.1	Transcript	(at3g51550 : 568.0) Encodes a synergid-expressed, plasma-membrane localized receptor-like kinase that accumulates asymetrically in the synergid membrnane at the filiform apparatus and mediates male-female gametophyte interactions during pollen tube reception.; FERONIA (FER); FUNCTIONS IN: protein kinase activity, kinase activity; INVOLVED IN: pollen tube reception, post-embryonic development, pro…	-1.6127
30.2.16	signalling.receptor kinases.Catharanthus roseus-like RLK1	medtr7g015290.1	Transcript	(at3g51550 : 316.0) Encodes a synergid-expressed, plasma-membrane localized receptor-like kinase that accumulates asymetrically in the synergid membrnane at the filiform apparatus and mediates male-female gametophyte interactions during pollen tube reception.; FERONIA (FER); FUNCTIONS IN: protein kinase activity, kinase activity; INVOLVED IN: pollen tube reception, post-embryonic development, pro…	-1.50014
30.2.16	signalling.receptor kinases.Catharanthus roseus-like RLK1	medtr7g015310.1	Transcript	(at3g51550 : 548.0) Encodes a synergid-expressed, plasma-membrane localized receptor-like kinase that accumulates asymetrically in the synergid membrnane at the filiform apparatus and mediates male-female gametophyte interactions during pollen tube reception.; FERONIA (FER); FUNCTIONS IN: protein kinase activity, kinase activity; INVOLVED IN: pollen tube reception, post-embryonic development, pro…	-2.16934
30.2.16	signalling.receptor kinases.Catharanthus roseus-like RLK1	medtr7g015320.1	Transcript	(at3g51550 : 535.0) Encodes a synergid-expressed, plasma-membrane localized receptor-like kinase that accumulates asymetrically in the synergid membrnane at the filiform apparatus and mediates male-female gametophyte interactions during pollen tube reception.; FERONIA (FER); FUNCTIONS IN: protein kinase activity, kinase activity; INVOLVED IN: pollen tube reception, post-embryonic development, pro…	-1.73403
30.2.16	signalling.receptor kinases.Catharanthus roseus-like RLK1	medtr7g015390.1	Transcript	(at3g51550 : 595.0) Encodes a synergid-expressed, plasma-membrane localized receptor-like kinase that accumulates asymetrically in the synergid membrnane at the filiform apparatus and mediates male-female gametophyte interactions during pollen tube reception.; FERONIA (FER); FUNCTIONS IN: protein kinase activity, kinase activity; INVOLVED IN: pollen tube reception, post-embryonic development, pro…	-1.9924
30.2.16	signalling.receptor kinases.Catharanthus roseus-like RLK1	medtr7g015620.1	Transcript	(at3g51550 : 394.0) Encodes a synergid-expressed, plasma-membrane localized receptor-like kinase that accumulates asymetrically in the synergid membrnane at the filiform apparatus and mediates male-female gametophyte interactions during pollen tube reception.; FERONIA (FER); FUNCTIONS IN: protein kinase activity, kinase activity; INVOLVED IN: pollen tube reception, post-embryonic development, pro…	-1.8147
30.2.16	signalling.receptor kinases.Catharanthus roseus-like RLK1	medtr7g073660.1	Transcript	(at3g51550 : 1218.0) Encodes a synergid-expressed, plasma-membrane localized receptor-like kinase that accumulates asymetrically in the synergid membrnane at the filiform apparatus and mediates male-female gametophyte interactions during pollen tube reception.; FERONIA (FER); FUNCTIONS IN: protein kinase activity, kinase activity; INVOLVED IN: pollen tube reception, post-embryonic development, pr…	1.39586
30.2.17	signalling.receptor kinases.DUF 26	medtr1g105700.1	Transcript	(at4g38830 : 494.0) Encodes a cysteine-rich receptor-like protein kinase.; cysteine-rich RLK (RECEPTOR-like protein kinase) 26 (CRK26); FUNCTIONS IN: kinase activity; INVOLVED IN: protein amino acid phosphorylation; LOCATED IN: endomembrane system; EXPRESSED IN: stem, root; CONTAINS InterPro DOMAIN/s: Protein kinase, ATP binding site (InterPro:IPR017441), Serine/threonine-protein kinase domain (I…	-1.89527
30.2.17	signalling.receptor kinases.DUF 26	medtr1g105710.1	Transcript	(at4g21410 : 505.0) Encodes a cysteine-rich receptor-like protein kinase.; cysteine-rich RLK (RECEPTOR-like protein kinase) 29 (CRK29); FUNCTIONS IN: kinase activity; INVOLVED IN: response to abscisic acid stimulus; LOCATED IN: plasma membrane, vacuole; EXPRESSED IN: 21 plant structures; EXPRESSED DURING: 13 growth stages; CONTAINS InterPro DOMAIN/s: Protein kinase, ATP binding site (InterPro:IPR…	-1.66629
30.2.17	signalling.receptor kinases.DUF 26	medtr1g105750.1	Transcript	(at4g21410 : 538.0) Encodes a cysteine-rich receptor-like protein kinase.; cysteine-rich RLK (RECEPTOR-like protein kinase) 29 (CRK29); FUNCTIONS IN: kinase activity; INVOLVED IN: response to abscisic acid stimulus; LOCATED IN: plasma membrane, vacuole; EXPRESSED IN: 21 plant structures; EXPRESSED DURING: 13 growth stages; CONTAINS InterPro DOMAIN/s: Protein kinase, ATP binding site (InterPro:IPR…	-2.21701
30.2.17	signalling.receptor kinases.DUF 26	medtr1g105850.1	Transcript	(at4g21410 : 140.0) Encodes a cysteine-rich receptor-like protein kinase.; cysteine-rich RLK (RECEPTOR-like protein kinase) 29 (CRK29); FUNCTIONS IN: kinase activity; INVOLVED IN: response to abscisic acid stimulus; LOCATED IN: plasma membrane, vacuole; EXPRESSED IN: 21 plant structures; EXPRESSED DURING: 13 growth stages; CONTAINS InterPro DOMAIN/s: Protein kinase, ATP binding site (InterPro:IPR…	-2.12775
30.2.17	signalling.receptor kinases.DUF 26	medtr3g064080.1	Transcript	(at1g70530 : 369.0) Encodes a cysteine-rich receptor-like protein kinase.; cysteine-rich RLK (RECEPTOR-like protein kinase) 3 (CRK3); FUNCTIONS IN: kinase activity; INVOLVED IN: protein amino acid phosphorylation; LOCATED IN: plasma membrane; EXPRESSED IN: 23 plant structures; EXPRESSED DURING: 14 growth stages; CONTAINS InterPro DOMAIN/s: Protein kinase, ATP binding site (InterPro:IPR017441), Pr…	-0.860581
30.2.17	signalling.receptor kinases.DUF 26	medtr3g064090.1	Transcript	(at1g70530 : 374.0) Encodes a cysteine-rich receptor-like protein kinase.; cysteine-rich RLK (RECEPTOR-like protein kinase) 3 (CRK3); FUNCTIONS IN: kinase activity; INVOLVED IN: protein amino acid phosphorylation; LOCATED IN: plasma membrane; EXPRESSED IN: 23 plant structures; EXPRESSED DURING: 14 growth stages; CONTAINS InterPro DOMAIN/s: Protein kinase, ATP binding site (InterPro:IPR017441), Pr…	-1.1719
30.2.17	signalling.receptor kinases.DUF 26	medtr5g033690.1	Transcript	(at1g70520 : 794.0) Encodes a cysteine-rich receptor-like protein kinase.; cysteine-rich RLK (RECEPTOR-like protein kinase) 2 (CRK2); FUNCTIONS IN: kinase activity; INVOLVED IN: response to ozone; LOCATED IN: plasma membrane; EXPRESSED IN: 23 plant structures; EXPRESSED DURING: 13 growth stages; CONTAINS InterPro DOMAIN/s: Protein kinase, ATP binding site (InterPro:IPR017441), Protein kinase, cat…	-1.15949
30.2.18	signalling.receptor kinases.extensin	medtr4g126270.1	Transcript	(at5g56890 : 667.0) Protein kinase superfamily protein; FUNCTIONS IN: protein serine/threonine kinase activity, protein kinase activity, kinase activity, ATP binding; INVOLVED IN: protein amino acid phosphorylation; LOCATED IN: plasma membrane; CONTAINS InterPro DOMAIN/s: Protein kinase, ATP binding site (InterPro:IPR017441), Serine/threonine-protein kinase domain (InterPro:IPR002290), Serine-thr…	1.35692
30.2.19	signalling.receptor kinases.legume-lectin	medtr5g068770.1	Transcript	(at5g55830 : 285.0) Concanavalin A-like lectin protein kinase family protein; FUNCTIONS IN: kinase activity; INVOLVED IN: protein amino acid phosphorylation; LOCATED IN: endomembrane system; EXPRESSED IN: 15 plant structures; EXPRESSED DURING: 6 growth stages; CONTAINS InterPro DOMAIN/s: Legume lectin, beta chain (InterPro:IPR001220), Protein kinase, ATP binding site (InterPro:IPR017441), Serine/…	1.00646
30.2.19	signalling.receptor kinases.legume-lectin	medtr7g062950.1	Transcript	(at2g37710 : 795.0) Induced in response to Salicylic acid.; receptor lectin kinase (RLK); FUNCTIONS IN: kinase activity; INVOLVED IN: response to salicylic acid stimulus; LOCATED IN: plasma membrane; EXPRESSED IN: 23 plant structures; EXPRESSED DURING: 13 growth stages; CONTAINS InterPro DOMAIN/s: Legume lectin, beta chain (InterPro:IPR001220), Protein kinase, ATP binding site (InterPro:IPR017441…	-1.36558
30.2.19	signalling.receptor kinases.legume-lectin	medtr7g063030.1	Transcript	(at3g55550 : 717.0) Concanavalin A-like lectin protein kinase family protein; FUNCTIONS IN: kinase activity; INVOLVED IN: protein amino acid phosphorylation; LOCATED IN: plasma membrane; CONTAINS InterPro DOMAIN/s: Legume lectin, beta chain (InterPro:IPR001220), Protein kinase, ATP binding site (InterPro:IPR017441), Serine/threonine-protein kinase-like domain (InterPro:IPR017442), Concanavalin A-…	-2.08526
30.2.20	signalling.receptor kinases.wheat LRK10 like	medtr1g026990.1	Transcript	(at4g18250 : 314.0) receptor serine/threonine kinase, putative; FUNCTIONS IN: transmembrane receptor protein serine/threonine kinase activity, kinase activity; INVOLVED IN: protein amino acid phosphorylation; EXPRESSED IN: 8 plant structures; EXPRESSED DURING: LP.06 six leaves visible, LP.04 four leaves visible, LP.10 ten leaves visible, LP.02 two leaves visible, LP.08 eight leaves visible; CONTA…	-2.14238
30.2.20	signalling.receptor kinases.wheat LRK10 like	medtr1g108910.1	Transcript	(at1g67000 : 293.0) Protein kinase superfamily protein; FUNCTIONS IN: protein serine/threonine kinase activity, protein kinase activity, kinase activity, ATP binding; INVOLVED IN: protein amino acid phosphorylation; LOCATED IN: endomembrane system; EXPRESSED IN: stem; CONTAINS InterPro DOMAIN/s: Protein kinase, ATP binding site (InterPro:IPR017441), Protein kinase, catalytic domain (InterPro:IPR0…	-1.80668
30.2.20	signalling.receptor kinases.wheat LRK10 like	medtr1g110120.1	Transcript	(at1g25390 : 447.0) Protein kinase superfamily protein; FUNCTIONS IN: kinase activity; INVOLVED IN: protein amino acid phosphorylation; LOCATED IN: plasma membrane; EXPRESSED IN: 23 plant structures; EXPRESSED DURING: 13 growth stages; CONTAINS InterPro DOMAIN/s: Protein kinase, ATP binding site (InterPro:IPR017441), Protein kinase, catalytic domain (InterPro:IPR000719), Serine/threonine-protein …	-1.66586
30.2.20	signalling.receptor kinases.wheat LRK10 like	medtr1g110130.1	Transcript	(at1g25390 : 470.0) Protein kinase superfamily protein; FUNCTIONS IN: kinase activity; INVOLVED IN: protein amino acid phosphorylation; LOCATED IN: plasma membrane; EXPRESSED IN: 23 plant structures; EXPRESSED DURING: 13 growth stages; CONTAINS InterPro DOMAIN/s: Protein kinase, ATP binding site (InterPro:IPR017441), Protein kinase, catalytic domain (InterPro:IPR000719), Serine/threonine-protein …	-2.95559
30.2.20	signalling.receptor kinases.wheat LRK10 like	medtr1g110140.1	Transcript	(at1g67000 : 389.0) Protein kinase superfamily protein; FUNCTIONS IN: protein serine/threonine kinase activity, protein kinase activity, kinase activity, ATP binding; INVOLVED IN: protein amino acid phosphorylation; LOCATED IN: endomembrane system; EXPRESSED IN: stem; CONTAINS InterPro DOMAIN/s: Protein kinase, ATP binding site (InterPro:IPR017441), Protein kinase, catalytic domain (InterPro:IPR0…	-2.42915
30.2.20	signalling.receptor kinases.wheat LRK10 like	medtr1g110180.1	Transcript	(at1g25390 : 459.0) Protein kinase superfamily protein; FUNCTIONS IN: kinase activity; INVOLVED IN: protein amino acid phosphorylation; LOCATED IN: plasma membrane; EXPRESSED IN: 23 plant structures; EXPRESSED DURING: 13 growth stages; CONTAINS InterPro DOMAIN/s: Protein kinase, ATP binding site (InterPro:IPR017441), Protein kinase, catalytic domain (InterPro:IPR000719), Serine/threonine-protein …	-1.81236
30.2.20	signalling.receptor kinases.wheat LRK10 like	medtr1g110220.1	Transcript	(at1g70250 : 323.0) Encodes a Protease inhibitor/seed storage/LTP family protein; receptor serine/threonine kinase, putative; FUNCTIONS IN: protein serine/threonine kinase activity, transmembrane receptor protein serine/threonine kinase activity, protein kinase activity, ATP binding; INVOLVED IN: protein amino acid phosphorylation; LOCATED IN: endomembrane system; EXPRESSED IN: 20 plant structure…	-2.07823
30.2.20	signalling.receptor kinases.wheat LRK10 like	medtr3g028630.1	Transcript	(at5g38280 : 342.0) putative receptor serine/threonine kinase PR5K (PR5K) mRNA, PR5-like receptor kinase; PR5-like receptor kinase (PR5K); FUNCTIONS IN: transmembrane receptor protein serine/threonine kinase activity, kinase activity; INVOLVED IN: response to fungus; LOCATED IN: endomembrane system; EXPRESSED IN: 6 plant structures; EXPRESSED DURING: petal differentiation and expansion stage; CON…	-1.51315
30.2.20	signalling.receptor kinases.wheat LRK10 like	medtr6g082950.1	Transcript	(at1g66980 : 386.0) Encodes SNC4 (suppressor of npr1-1, constitutive 4), an atypical receptor-like kinase with two predicted extracellular glycerophosphoryl diester phosphodiesterase domains.; suppressor of npr1-1 constitutive 4 (SNC4); CONTAINS InterPro DOMAIN/s: Protein kinase, ATP binding site (InterPro:IPR017441), Serine/threonine-protein kinase domain (InterPro:IPR002290), Serine-threonine/t…	-1.89822
30.2.20	signalling.receptor kinases.wheat LRK10 like	medtr6g083780.1	Transcript	(at1g66920 : 417.0) Protein kinase superfamily protein; FUNCTIONS IN: protein serine/threonine kinase activity, protein kinase activity, kinase activity, ATP binding; INVOLVED IN: protein amino acid phosphorylation; LOCATED IN: endomembrane system; CONTAINS InterPro DOMAIN/s: Protein kinase, ATP binding site (InterPro:IPR017441), Serine/threonine-protein kinase domain (InterPro:IPR002290), Serine…	-2.17433
30.2.20	signalling.receptor kinases.wheat LRK10 like	medtr6g083740.1	Transcript	(at1g66910 : 254.0) Protein kinase superfamily protein; FUNCTIONS IN: kinase activity; INVOLVED IN: protein amino acid phosphorylation; LOCATED IN: endomembrane system; CONTAINS InterPro DOMAIN/s: Protein kinase, ATP binding site (InterPro:IPR017441), Serine/threonine-protein kinase domain (InterPro:IPR002290), Serine-threonine/tyrosine-protein kinase (InterPro:IPR001245), Serine/threonine-protei…	-1.39485
30.2.21	signalling.receptor kinases.lysine motif	medtr5g033490.1	Transcript	(at1g51940 : 364.0) protein kinase family protein / peptidoglycan-binding LysM domain-containing protein; FUNCTIONS IN: kinase activity; INVOLVED IN: protein amino acid phosphorylation, cell wall macromolecule catabolic process; LOCATED IN: endomembrane system; EXPRESSED IN: 22 plant structures; EXPRESSED DURING: 13 growth stages; CONTAINS InterPro DOMAIN/s: Protein kinase, ATP binding site (Inte…	4.2658
30.2.24	signalling.receptor kinases.S-locus glycoprotein like	medtr1g032930.1	Transcript	(at1g34300 : 382.0) lectin protein kinase family protein; FUNCTIONS IN: in 6 functions; INVOLVED IN: protein amino acid phosphorylation, recognition of pollen; LOCATED IN: plasma membrane; EXPRESSED IN: 23 plant structures; EXPRESSED DURING: 13 growth stages; CONTAINS InterPro DOMAIN/s: Curculin-like (mannose-binding) lectin (InterPro:IPR001480), Protein kinase, ATP binding site (InterPro:IPR0174…	-1.44745
30.2.24	signalling.receptor kinases.S-locus glycoprotein like	medtr1g099400.1	Transcript	(at5g24080 : 694.0) Protein kinase superfamily protein; FUNCTIONS IN: protein serine/threonine kinase activity, protein kinase activity, kinase activity, ATP binding; INVOLVED IN: protein amino acid phosphorylation; LOCATED IN: cellular_component unknown; EXPRESSED IN: sperm cell, stamen; EXPRESSED DURING: 4 anthesis; CONTAINS InterPro DOMAIN/s: Protein kinase, ATP binding site (InterPro:IPR01744…	4.75386
30.2.24	signalling.receptor kinases.S-locus glycoprotein like	medtr4g081650.1	Transcript	(at4g21380 : 724.0) encodes a putative receptor-like serine/threonine protein kinases that is similar to Brassica self-incompatibility (S) locus. Expressed in root. Shoot expression limited to limited to the root-hypocotyl transition zone and at the base of lateral roots as well as in axillary buds, and pedicels.; receptor kinase 3 (RK3); FUNCTIONS IN: transmembrane receptor protein serine/threon…	-2.1165
30.2.24	signalling.receptor kinases.S-locus glycoprotein like	medtr4g081665.1	Transcript	(at4g21380 : 717.0) encodes a putative receptor-like serine/threonine protein kinases that is similar to Brassica self-incompatibility (S) locus. Expressed in root. Shoot expression limited to limited to the root-hypocotyl transition zone and at the base of lateral roots as well as in axillary buds, and pedicels.; receptor kinase 3 (RK3); FUNCTIONS IN: transmembrane receptor protein serine/threon…	-2.30366
30.2.24	signalling.receptor kinases.S-locus glycoprotein like	medtr4g081750.1	Transcript	(at4g21380 : 637.0) encodes a putative receptor-like serine/threonine protein kinases that is similar to Brassica self-incompatibility (S) locus. Expressed in root. Shoot expression limited to limited to the root-hypocotyl transition zone and at the base of lateral roots as well as in axillary buds, and pedicels.; receptor kinase 3 (RK3); FUNCTIONS IN: transmembrane receptor protein serine/threon…	-2.22491
30.2.24	signalling.receptor kinases.S-locus glycoprotein like	medtr4g091670.1	Transcript	(at4g21380 : 930.0) encodes a putative receptor-like serine/threonine protein kinases that is similar to Brassica self-incompatibility (S) locus. Expressed in root. Shoot expression limited to limited to the root-hypocotyl transition zone and at the base of lateral roots as well as in axillary buds, and pedicels.; receptor kinase 3 (RK3); FUNCTIONS IN: transmembrane receptor protein serine/threon…	-1.02119
30.2.24	signalling.receptor kinases.S-locus glycoprotein like	medtr4g091680.1	Transcript	(at1g11340 : 712.0) S-locus lectin protein kinase family protein; FUNCTIONS IN: in 6 functions; INVOLVED IN: protein amino acid phosphorylation, recognition of pollen; LOCATED IN: endomembrane system; EXPRESSED IN: 8 plant structures; EXPRESSED DURING: 6 growth stages; CONTAINS InterPro DOMAIN/s: Curculin-like (mannose-binding) lectin (InterPro:IPR001480), PAN-2 domain (InterPro:IPR013227), Apple…	-2.61913
30.2.24	signalling.receptor kinases.S-locus glycoprotein like	medtr4g091730.1	Transcript	(at1g11340 : 632.0) S-locus lectin protein kinase family protein; FUNCTIONS IN: in 6 functions; INVOLVED IN: protein amino acid phosphorylation, recognition of pollen; LOCATED IN: endomembrane system; EXPRESSED IN: 8 plant structures; EXPRESSED DURING: 6 growth stages; CONTAINS InterPro DOMAIN/s: Curculin-like (mannose-binding) lectin (InterPro:IPR001480), PAN-2 domain (InterPro:IPR013227), Apple…	-2.33846
30.2.24	signalling.receptor kinases.S-locus glycoprotein like	medtr4g091760.1	Transcript	(at1g11340 : 798.0) S-locus lectin protein kinase family protein; FUNCTIONS IN: in 6 functions; INVOLVED IN: protein amino acid phosphorylation, recognition of pollen; LOCATED IN: endomembrane system; EXPRESSED IN: 8 plant structures; EXPRESSED DURING: 6 growth stages; CONTAINS InterPro DOMAIN/s: Curculin-like (mannose-binding) lectin (InterPro:IPR001480), PAN-2 domain (InterPro:IPR013227), Apple…	-2.50072
30.2.24	signalling.receptor kinases.S-locus glycoprotein like	medtr4g091780.1	Transcript	(at1g11340 : 784.0) S-locus lectin protein kinase family protein; FUNCTIONS IN: in 6 functions; INVOLVED IN: protein amino acid phosphorylation, recognition of pollen; LOCATED IN: endomembrane system; EXPRESSED IN: 8 plant structures; EXPRESSED DURING: 6 growth stages; CONTAINS InterPro DOMAIN/s: Curculin-like (mannose-binding) lectin (InterPro:IPR001480), PAN-2 domain (InterPro:IPR013227), Apple…	-2.84456
30.2.24	signalling.receptor kinases.S-locus glycoprotein like	medtr4g091820.1	Transcript	(at1g11340 : 786.0) S-locus lectin protein kinase family protein; FUNCTIONS IN: in 6 functions; INVOLVED IN: protein amino acid phosphorylation, recognition of pollen; LOCATED IN: endomembrane system; EXPRESSED IN: 8 plant structures; EXPRESSED DURING: 6 growth stages; CONTAINS InterPro DOMAIN/s: Curculin-like (mannose-binding) lectin (InterPro:IPR001480), PAN-2 domain (InterPro:IPR013227), Apple…	-2.55981
30.2.24	signalling.receptor kinases.S-locus glycoprotein like	medtr6g043790.1	Transcript	(at1g34300 : 881.0) lectin protein kinase family protein; FUNCTIONS IN: in 6 functions; INVOLVED IN: protein amino acid phosphorylation, recognition of pollen; LOCATED IN: plasma membrane; EXPRESSED IN: 23 plant structures; EXPRESSED DURING: 13 growth stages; CONTAINS InterPro DOMAIN/s: Curculin-like (mannose-binding) lectin (InterPro:IPR001480), Protein kinase, ATP binding site (InterPro:IPR0174…	-2.93214
30.2.25	signalling.receptor kinases.wall associated kinase	medtr1g010240.1	Transcript	(at1g21240 : 387.0) encodes a wall-associated kinase; wall associated kinase 3 (WAK3); FUNCTIONS IN: protein serine/threonine kinase activity, kinase activity; INVOLVED IN: protein amino acid phosphorylation; LOCATED IN: plasma membrane; EXPRESSED IN: 9 plant structures; EXPRESSED DURING: 9 growth stages; CONTAINS InterPro DOMAIN/s: EGF-like calcium-binding (InterPro:IPR001881), EGF-like, type 3 …	-1.58433
30.2.25	signalling.receptor kinases.wall associated kinase	medtr1g010250.1	Transcript	(at1g21230 : 364.0) encodes a wall-associated kinase; wall associated kinase 5 (WAK5); FUNCTIONS IN: protein serine/threonine kinase activity, kinase activity; INVOLVED IN: protein amino acid phosphorylation; LOCATED IN: plasma membrane; CONTAINS InterPro DOMAIN/s: EGF-like calcium-binding (InterPro:IPR001881), EGF-like, type 3 (InterPro:IPR000742), Serine-threonine/tyrosine-protein kinase (Inter…	-1.55315
30.2.25	signalling.receptor kinases.wall associated kinase	medtr1g010260.1	Transcript	(at1g21270 : 525.0) cytoplasmic serine/threonine protein kinase induced by salicylic acid. mutant plants exhibit a loss of cell expansion and dependence on sugars and salts for seedling growth, affecting the expression and activity of vacuolar invertase.; wall-associated kinase 2 (WAK2); FUNCTIONS IN: protein serine/threonine kinase activity, protein kinase activity, calcium ion binding, ATP bind…	-1.47598
30.2.26	signalling.receptor kinases.crinkly like	medtr4g035180.1	Transcript	(at5g47850 : 607.0) CRINKLY4 related 4 (CCR4); FUNCTIONS IN: kinase activity; INVOLVED IN: protein amino acid phosphorylation; LOCATED IN: endomembrane system; EXPRESSED IN: stem; CONTAINS InterPro DOMAIN/s: Protein kinase, ATP binding site (InterPro:IPR017441), Regulator of chromosome condensation/beta-lactamase-inhibitor protein II (InterPro:IPR009091), Protein kinase, catalytic domain (InterPr…	-2.65024
30.2.99	signalling.receptor kinases.misc	medtr2g064580.1	Transcript	(at5g25910 : 188.0) putative disease resistance protein induced by chitin oligomers.; receptor like protein 52 (RLP52); FUNCTIONS IN: kinase activity; INVOLVED IN: signal transduction, defense response to fungus, response to chitin, defense response; LOCATED IN: endomembrane system; EXPRESSED IN: stem, stamen; EXPRESSED DURING: 4 anthesis; CONTAINS InterPro DOMAIN/s: Leucine-rich repeat-containin…	-3.6385
30.2.99	signalling.receptor kinases.misc	medtr2g088980.1	Transcript	(at3g22060 : 254.0) contains Pfam profile: PF01657 Domain of unknown function that is usually associated with protein kinase domain Pfam:PF00069, however this protein does not have the protein kinase domain; Receptor-like protein kinase-related family protein; FUNCTIONS IN: molecular_function unknown; INVOLVED IN: response to abscisic acid stimulus; LOCATED IN: cell wall, vacuole; EXPRESSED IN: 1…	-2.58295
30.2.99	signalling.receptor kinases.misc	medtr3g072030.1	Transcript	(gnl|cdd|70566 : 127.0) no description available & (at3g10985 : 116.0) A senescence-associated gene whose expression is induced in response to treatment with Nep1, a fungal protein that causes necrosis.; senescence associated gene 20 (SAG20); CONTAINS InterPro DOMAIN/s: Wound-induced protein, Wun1, subgroup (InterPro:IPR016533), Wound-induced protein, Wun1 (InterPro:IPR009798); BEST Arabidopsis t…	-1.14188
30.2.99	signalling.receptor kinases.misc	medtr4g015960.1	Transcript	(at1g74190 : 318.0) receptor like protein 15 (RLP15); INVOLVED IN: signal transduction; LOCATED IN: endomembrane system; CONTAINS InterPro DOMAIN/s: Leucine-rich repeat-containing N-terminal domain, type 2 (InterPro:IPR013210), Leucine-rich repeat (InterPro:IPR001611); BEST Arabidopsis thaliana protein match is: receptor like protein 13 (TAIR:AT1G74170.1); Has 128946 Blast hits to 31204 proteins …	-1.59245
30.2.99	signalling.receptor kinases.misc	medtr4g016810.1	Transcript	(at1g58190 : 337.0) receptor like protein 9 (RLP9); INVOLVED IN: signal transduction; LOCATED IN: endomembrane system; CONTAINS InterPro DOMAIN/s: Leucine-rich repeat, typical subtype (InterPro:IPR003591), Leucine-rich repeat-containing N-terminal domain, type 2 (InterPro:IPR013210), Leucine-rich repeat (InterPro:IPR001611); BEST Arabidopsis thaliana protein match is: receptor like protein 13 (TA…	-1.35584
30.2.99	signalling.receptor kinases.misc	medtr7g062950.1	Transcript	(at2g37710 : 795.0) Induced in response to Salicylic acid.; receptor lectin kinase (RLK); FUNCTIONS IN: kinase activity; INVOLVED IN: response to salicylic acid stimulus; LOCATED IN: plasma membrane; EXPRESSED IN: 23 plant structures; EXPRESSED DURING: 13 growth stages; CONTAINS InterPro DOMAIN/s: Legume lectin, beta chain (InterPro:IPR001220), Protein kinase, ATP binding site (InterPro:IPR017441…	-1.36558
30.2.99	signalling.receptor kinases.misc	medtr8g014700.1	Transcript	(at4g29990 : 743.0) Leucine-rich repeat transmembrane protein kinase protein; FUNCTIONS IN: protein serine/threonine kinase activity, protein kinase activity, ATP binding; INVOLVED IN: protein amino acid phosphorylation; LOCATED IN: endomembrane system; EXPRESSED IN: embryo, leaf whorl, root; EXPRESSED DURING: D bilateral stage; CONTAINS InterPro DOMAIN/s: Protein kinase, ATP binding site (InterP…	-2.29195
30.2.99	signalling.receptor kinases.misc	medtr8g014790.1	Transcript	(at4g29990 : 782.0) Leucine-rich repeat transmembrane protein kinase protein; FUNCTIONS IN: protein serine/threonine kinase activity, protein kinase activity, ATP binding; INVOLVED IN: protein amino acid phosphorylation; LOCATED IN: endomembrane system; EXPRESSED IN: embryo, leaf whorl, root; EXPRESSED DURING: D bilateral stage; CONTAINS InterPro DOMAIN/s: Protein kinase, ATP binding site (InterP…	-2.16987
30.2.99	signalling.receptor kinases.misc	medtr8g015010.1	Transcript	(at4g29990 : 658.0) Leucine-rich repeat transmembrane protein kinase protein; FUNCTIONS IN: protein serine/threonine kinase activity, protein kinase activity, ATP binding; INVOLVED IN: protein amino acid phosphorylation; LOCATED IN: endomembrane system; EXPRESSED IN: embryo, leaf whorl, root; EXPRESSED DURING: D bilateral stage; CONTAINS InterPro DOMAIN/s: Protein kinase, ATP binding site (InterP…	-1.63556
30.2.99	signalling.receptor kinases.misc	medtr8g015040.1	Transcript	(at4g29990 : 664.0) Leucine-rich repeat transmembrane protein kinase protein; FUNCTIONS IN: protein serine/threonine kinase activity, protein kinase activity, ATP binding; INVOLVED IN: protein amino acid phosphorylation; LOCATED IN: endomembrane system; EXPRESSED IN: embryo, leaf whorl, root; EXPRESSED DURING: D bilateral stage; CONTAINS InterPro DOMAIN/s: Protein kinase, ATP binding site (InterP…	-1.29855
30.2.99	signalling.receptor kinases.misc	medtr8g015100.1	Transcript	(at2g28970 : 494.0) Leucine-rich repeat protein kinase family protein; FUNCTIONS IN: protein serine/threonine kinase activity, kinase activity, ATP binding; INVOLVED IN: transmembrane receptor protein tyrosine kinase signaling pathway, protein amino acid phosphorylation; LOCATED IN: endomembrane system; EXPRESSED IN: root; CONTAINS InterPro DOMAIN/s: Protein kinase, ATP binding site (InterPro:IPR…	-1.61018
30.2.99	signalling.receptor kinases.misc	medtr8g015200.1	Transcript	(at4g29990 : 735.0) Leucine-rich repeat transmembrane protein kinase protein; FUNCTIONS IN: protein serine/threonine kinase activity, protein kinase activity, ATP binding; INVOLVED IN: protein amino acid phosphorylation; LOCATED IN: endomembrane system; EXPRESSED IN: embryo, leaf whorl, root; EXPRESSED DURING: D bilateral stage; CONTAINS InterPro DOMAIN/s: Protein kinase, ATP binding site (InterP…	-2.48452
30.6	signalling.MAP kinases	medtr2g040510.1	Transcript	(at4g29810 : 457.0) encodes a MAP kinase kinase 2 that regulates MPK6 and MPK4 in response to cold and salt stresses. Co-expression with MEKK1 in protoplasts activated MKK2 activity, suggesting that MEKK1 may be a regulator of MKK2.; MAP kinase kinase 2 (MKK2); FUNCTIONS IN: MAP kinase kinase activity, kinase activity; INVOLVED IN: cold acclimation, MAPKKK cascade, response to salt stress, respon…	-1.26221
30.6	signalling.MAP kinases	medtr4g028830.1	Transcript	(at3g51630 : 551.0) Encodes a member of the WNK family (9 members in all) of protein kinases, the structural design of which is clearly distinct from those of other known protein kinases, such as receptor-like kinases and mitogen-activated protein kinases.; with no lysine (K) kinase 5 (WNK5); CONTAINS InterPro DOMAIN/s: Protein kinase, catalytic domain (InterPro:IPR000719), Serine/threonine-prote…	-1.84649
30.6	signalling.MAP kinases	medtr6g071280.1	Transcript	(at1g73500 : 355.0) member of MAP Kinase Kinase family. Autophosphorylates and also phosphorylates MPK3 and MPK6. Independently involved in ethylene and calmalexin biosynthesis. Induces transcription of ACS2, ACS6, ERF1, ERF2, ERF5, ERF6, CYP79B2, CYP79B3, CYP71A13 and PAD3.; MAP kinase kinase 9 (MKK9); FUNCTIONS IN: protein kinase activator activity, MAP kinase kinase activity, kinase activity; …	-2.65729
30.6	signalling.MAP kinases	medtr8g107000.1	Transcript	(at1g73660 : 983.0) Encodes a protein with similarity to MAPKKKs. May function as a negative regulator of salt tolerance.; protein tyrosine kinase family protein; CONTAINS InterPro DOMAIN/s: Protein kinase, ATP binding site (InterPro:IPR017441), Protein kinase, catalytic domain (InterPro:IPR000719), Serine-threonine/tyrosine-protein kinase (InterPro:IPR001245), Ubiquitin interacting motif (InterP…	-1.30715
30.3	signalling.calcium	medtr1g023760.1	Transcript	(at1g19870 : 227.0) IQ-domain 32 (iqd32); FUNCTIONS IN: calmodulin binding; INVOLVED IN: biological_process unknown; LOCATED IN: cytosol, nucleus, plasma membrane, chloroplast envelope; EXPRESSED IN: 24 plant structures; EXPRESSED DURING: 13 growth stages; CONTAINS InterPro DOMAIN/s: IQ calmodulin-binding region (InterPro:IPR000048); BEST Arabidopsis thaliana protein match is: IQ-domain 31 (TAIR:…	0.696403
30.3	signalling.calcium	medtr1g060590.1	Transcript	(at3g52870 : 476.0) IQ calmodulin-binding motif family protein; CONTAINS InterPro DOMAIN/s: IQ calmodulin-binding region (InterPro:IPR000048); BEST Arabidopsis thaliana protein match is: calmodulin-binding family protein (TAIR:AT3G58480.1); Has 341 Blast hits to 277 proteins in 58 species: Archae - 0; Bacteria - 26; Metazoa - 0; Fungi - 100; Plants - 209; Viruses - 0; Other Eukaryotes - 6 (source…	-1.02507
30.3	signalling.calcium	medtr1g103070.1	Transcript	(at4g14750 : 221.0) IQ-domain 19 (IQD19); CONTAINS InterPro DOMAIN/s: IQ calmodulin-binding region (InterPro:IPR000048); BEST Arabidopsis thaliana protein match is: IQ-domain 26 (TAIR:AT3G16490.1); Has 2338 Blast hits to 1945 proteins in 201 species: Archae - 4; Bacteria - 168; Metazoa - 612; Fungi - 134; Plants - 1079; Viruses - 66; Other Eukaryotes - 275 (source: NCBI BLink). & (reliability: 44…	1.52691
30.3	signalling.calcium	medtr2g025180.1	Transcript	(at4g05520 : 873.0) Encodes AtEHD2, one of the Arabidopsis Eps15 homology domain proteins involved in endocytosis (AtEHD1, At3g20290).; EPS15 homology domain 2 (EHD2); FUNCTIONS IN: GTP binding, GTPase activity, calcium ion binding; INVOLVED IN: endocytosis; LOCATED IN: plasma membrane, microsome, membrane, cytoplasm; EXPRESSED IN: 22 plant structures; EXPRESSED DURING: 13 growth stages; CONTAINS…	1.58796
30.3	signalling.calcium	medtr3g054130.1	Transcript	(at3g20290 : 831.0) Encodes AtEHD1, one of the Arabidopsis Eps15 homology domain proteins involved in endocytosis (AtEHD2, At4g05520).; EPS15 homology domain 1 (EHD1); FUNCTIONS IN: GTP binding, GTPase activity, calcium ion binding; INVOLVED IN: endocytosis; LOCATED IN: endosome, microsome, membrane, cytoplasm; EXPRESSED IN: 24 plant structures; EXPRESSED DURING: 15 growth stages; CONTAINS InterP…	1.61783
30.3	signalling.calcium	medtr3g091560.1	Transcript	(at3g49260 : 147.0) IQ-domain 21 (iqd21); FUNCTIONS IN: calmodulin binding; INVOLVED IN: biological_process unknown; LOCATED IN: cellular_component unknown; EXPRESSED IN: 19 plant structures; EXPRESSED DURING: 13 growth stages; CONTAINS InterPro DOMAIN/s: IQ calmodulin-binding region (InterPro:IPR000048); BEST Arabidopsis thaliana protein match is: IQ-domain 2 (TAIR:AT5G03040.3). & (reliability: …	-1.66631
30.3	signalling.calcium	medtr4g036110.1	Transcript	(at5g62390 : 237.0) A member of Arabidopsis BAG (Bcl-2-associated athanogene) proteins, plant homologs of mammalian regulators of apoptosis. Plant BAG proteins are multi-functional and remarkably similar to their animal counterparts, as they regulate apoptotic-like processes ranging from pathogen attack, to abiotic stress, to plant development. Localized to the ER. Necessary for the proper mainte…	1.14517
30.3	signalling.calcium	medtr4g108140.1	Transcript	(at1g74690 : 304.0) IQ-domain 31 (IQD31); FUNCTIONS IN: calmodulin binding; INVOLVED IN: biological_process unknown; LOCATED IN: cytosol, plasma membrane; EXPRESSED IN: 23 plant structures; EXPRESSED DURING: 13 growth stages; CONTAINS InterPro DOMAIN/s: IQ calmodulin-binding region (InterPro:IPR000048); BEST Arabidopsis thaliana protein match is: IQ-domain 30 (TAIR:AT1G18840.2); Has 8498 Blast hi…	0.835246
30.3	signalling.calcium	medtr5g009830.1	Transcript	(at4g23650 : 764.0) Encodes calcium dependent protein kinase 3 (CPK3), a member of the Arabidopsis CDPK gene family. CDPKs contain an intrinsic Ca2+-activation domain with four EF hand Ca2+-binding sites. CDPKs protein kinases have been proposed to function in multiple plant signal transduction pathways downstream of [Ca2+]cyt elevations, thus transducing various physiological responses. CPK3 is …	-0.625231
30.3	signalling.calcium	medtr5g068820.1	Transcript	(at5g54130 : 628.0) Calcium-binding endonuclease/exonuclease/phosphatase family; EXPRESSED IN: 24 plant structures; EXPRESSED DURING: 15 growth stages; CONTAINS InterPro DOMAIN/s: Endonuclease/exonuclease/phosphatase (InterPro:IPR005135); BEST Arabidopsis thaliana protein match is: Calcium-binding endonuclease/exonuclease/phosphatase family (TAIR:AT1G02270.1); Has 30201 Blast hits to 17322 protei…	-1.96171
30.3	signalling.calcium	medtr6g023460.1	Transcript	(gnl|cdd|35250 : 102.0) no description available & (at3g50770 : 98.6) calmodulin-like 41 (CML41); FUNCTIONS IN: calcium ion binding; INVOLVED IN: biological_process unknown; LOCATED IN: chloroplast; EXPRESSED IN: 17 plant structures; EXPRESSED DURING: 11 growth stages; CONTAINS InterPro DOMAIN/s: EF-Hand 1, calcium-binding site (InterPro:IPR018247), EF-HAND 2 (InterPro:IPR018249), EF-hand-like do…	-5.29183
30.3	signalling.calcium	medtr8g023830.1	Transcript	(at1g02270 : 570.0) Calcium-binding endonuclease/exonuclease/phosphatase family; FUNCTIONS IN: catalytic activity, calcium ion binding; INVOLVED IN: response to cold; LOCATED IN: nucleus; EXPRESSED IN: 22 plant structures; EXPRESSED DURING: 13 growth stages; CONTAINS InterPro DOMAIN/s: EF-HAND 2 (InterPro:IPR018249), EF-hand-like domain (InterPro:IPR011992), Endonuclease/exonuclease/phosphatase (…	-0.803256
30.3	signalling.calcium	medtr8g027620.1	Transcript	(at5g24270 : 237.0) encodes a calcium sensor that is essential for K+ nutrition, K+/Na+ selectivity, and salt tolerance. The protein is similar to calcineurin B. Lines carrying recessive mutations are hypersensitive to Na+ and Li+ stresses and is unable to grow in low K+. The growth defect is rescued by extracellular calcium.; SALT OVERLY SENSITIVE 3 (SOS3); CONTAINS InterPro DOMAIN/s: Recoverin …	-0.861731
30.3	signalling.calcium	medtr8g045070.1	Transcript	(at3g57330 : 1085.0) autoinhibited Ca2+-ATPase 11 (ACA11); FUNCTIONS IN: calcium-transporting ATPase activity, calmodulin binding; INVOLVED IN: defense response to bacterium, negative regulation of programmed cell death, anion homeostasis; LOCATED IN: plant-type vacuole membrane, chloroplast, plasma membrane, vacuole; EXPRESSED IN: 26 plant structures; EXPRESSED DURING: 15 growth stages; CONTAINS…	-1.07784
Heat shock proteins
20.2.1	stress.abiotic.heat	medtr1g038430.1	Transcript	(at5g23240 : 401.0) DNAJ heat shock N-terminal domain-containing protein; FUNCTIONS IN: unfolded protein binding, heat shock protein binding; INVOLVED IN: protein folding; LOCATED IN: chloroplast; EXPRESSED IN: 21 plant structures; EXPRESSED DURING: 11 growth stages; CONTAINS InterPro DOMAIN/s: Molecular chaperone, heat shock protein, Hsp40, DnaJ (InterPro:IPR015609), Heat shock protein DnaJ, N-t…	-2.05028
20.2.1	stress.abiotic.heat	medtr1g087270.1	Transcript	(at4g02100 : 625.0) Heat shock protein DnaJ with tetratricopeptide repeat; FUNCTIONS IN: binding, heat shock protein binding; INVOLVED IN: protein folding; LOCATED IN: cellular_component unknown; EXPRESSED IN: leaf; CONTAINS InterPro DOMAIN/s: Tetratricopeptide-like helical (InterPro:IPR011990), Heat shock protein DnaJ, N-terminal (InterPro:IPR001623); BEST Arabidopsis thaliana protein match is: …	2.28196
20.2.1	stress.abiotic.heat	medtr4g063710.1	Transcript	(p09189|hsp7c_pethy : 1087.0) Heat shock cognate 70 kDa protein - Petunia hybrida (Petunia) & (at3g12580 : 1084.0) heat shock protein 70 (HSP70); FUNCTIONS IN: ATP binding; INVOLVED IN: in 9 processes; LOCATED IN: cytosol, mitochondrion, cell wall, plasma membrane; EXPRESSED IN: 23 plant structures; EXPRESSED DURING: 11 growth stages; CONTAINS InterPro DOMAIN/s: Heat shock protein 70, conserved s…	1.24803
20.2.1	stress.abiotic.heat	medtr4g063720.1	Transcript	(p09189|hsp7c_pethy : 1079.0) Heat shock cognate 70 kDa protein - Petunia hybrida (Petunia) & (at3g12580 : 1077.0) heat shock protein 70 (HSP70); FUNCTIONS IN: ATP binding; INVOLVED IN: in 9 processes; LOCATED IN: cytosol, mitochondrion, cell wall, plasma membrane; EXPRESSED IN: 23 plant structures; EXPRESSED DURING: 11 growth stages; CONTAINS InterPro DOMAIN/s: Heat shock protein 70, conserved s…	1.22499
20.2.1	stress.abiotic.heat	medtr6g033820.1	Transcript	(p09189|hsp7c_pethy : 758.0) Heat shock cognate 70 kDa protein - Petunia hybrida (Petunia) & (at3g12580 : 750.0) heat shock protein 70 (HSP70); FUNCTIONS IN: ATP binding; INVOLVED IN: in 9 processes; LOCATED IN: cytosol, mitochondrion, cell wall, plasma membrane; EXPRESSED IN: 23 plant structures; EXPRESSED DURING: 11 growth stages; CONTAINS InterPro DOMAIN/s: Heat shock protein 70, conserved sit…	-2.61473
20.2.1	stress.abiotic.heat	medtr6g033870.1	Transcript	(p09189|hsp7c_pethy : 755.0) Heat shock cognate 70 kDa protein - Petunia hybrida (Petunia) & (at3g12580 : 745.0) heat shock protein 70 (HSP70); FUNCTIONS IN: ATP binding; INVOLVED IN: in 9 processes; LOCATED IN: cytosol, mitochondrion, cell wall, plasma membrane; EXPRESSED IN: 23 plant structures; EXPRESSED DURING: 11 growth stages; CONTAINS InterPro DOMAIN/s: Heat shock protein 70, conserved sit…	-2.50653
20.2.1	stress.abiotic.heat	medtr6g033955.1	Transcript	(p09189|hsp7c_pethy : 764.0) Heat shock cognate 70 kDa protein - Petunia hybrida (Petunia) & (at3g12580 : 755.0) heat shock protein 70 (HSP70); FUNCTIONS IN: ATP binding; INVOLVED IN: in 9 processes; LOCATED IN: cytosol, mitochondrion, cell wall, plasma membrane; EXPRESSED IN: 23 plant structures; EXPRESSED DURING: 11 growth stages; CONTAINS InterPro DOMAIN/s: Heat shock protein 70, conserved sit…	-2.68375
20.2.1	stress.abiotic.heat	medtr6g452990.1	Transcript	(at5g52640 : 1089.0) Encodes a cytosolic heat shock protein AtHSP90.1. AtHSP90.1 interacts with disease resistance signaling components SGT1b and RAR1 and is required for RPS2-mediated resistance.; heat shock protein 90.1 (HSP90.1); FUNCTIONS IN: unfolded protein binding, ATP binding; INVOLVED IN: defense response to bacterium, response to heat, response to arsenic; LOCATED IN: cytosol, cell wall…	1.39294
20.2.1	stress.abiotic.heat	medtr7g012820.1	Transcript	(at5g15450 : 1501.0) Encodes a chloroplast-targeted Hsp101 homologue. Functions as a molecular chaperone involved in plastid differentiation mediating internal thylakoid membrane formation and conferring thermotolerance to chloroplasts during heat stress. APG6 is constitutively expressed in the root tips, the organ boundary region, the reproductive tissues of mature plants where plastids exist as…	3.21406
20.2.1	stress.abiotic.heat	medtr0027s0230.1	Transcript	(p05478|hsp16_soybn : 119.0) 18.5 kDa class I heat shock protein (HSP 18.5) - Glycine max (Soybean) & (at2g29500 : 109.0) HSP20-like chaperones superfamily protein; CONTAINS InterPro DOMAIN/s: Heat shock protein Hsp20 (InterPro:IPR002068), HSP20-like chaperone (InterPro:IPR008978); BEST Arabidopsis thaliana protein match is: HSP20-like chaperones superfamily protein (TAIR:AT1G07400.1); Has 6873 B…	-1.41904
20.2.1	stress.abiotic.heat	medtr1207s0010.1	Transcript	(at5g02490 : 251.0) Heat shock protein 70 (Hsp 70) family protein; FUNCTIONS IN: protein binding; INVOLVED IN: protein folding, response to cadmium ion, response to heat, response to bacterium; LOCATED IN: cytosol, cell wall, plasma membrane; EXPRESSED IN: 19 plant structures; EXPRESSED DURING: 10 growth stages; CONTAINS InterPro DOMAIN/s: Heat shock protein 70, conserved site (InterPro:IPR018181…	-2.52766
