# Supplementary material for: Elucidation of Physiological, Transcriptomic and Metabolomic Salinity Response Mechanisms in Medicago sativa
Source: Plants (Basel). 2023 May 22;12(10):2059. doi: 10.3390/plants12102059 (PMC10221938; doi:10.3390/plants12102059)
Supplement: Supplementary file 1 [file plants-12-02059-s001.zip › plants-2403550-supplementary/Supplemental File 3 Metabolite classification (Mar 19 2023).xlsx]

## Sheet: Sheet1
Metabolite name	FoldChange	Log2FC	p-value	KEGG ID	HMDB ID	Superclass	Class	Sub-class
N-Acetylglutamate	0.110699	-3.17528	0.0155546	C00624	HMDB0001138	Organic acids and derivatives	Carboxylic acids and derivatives	Amino acids, peptides and analogues
L-Glutamic acid	0.261612	-1.9345	0.015042	C00025	HMDB0000148	Organic acids and derivatives	Carboxylic acids and derivatives	Amino acids peptides and analogues
L-Glutamine	0.284324	-1.81439	0.00439733	C00064	HMDB0000641	Organic acids and derivatives	Carboxylic acids and derivatives	Amino acids, peptides and analogues
L-Aspartic acid	0.310623	-1.68676	0.000618216	C00049	HMDB0000191	Organic acids and derivatives	Carboxylic acids and derivatives	Amino acids, peptides and analogues
L-Threonine	1.60824	0.685485	0.000568655	C00188	HMDB0000167	Organic acids and derivatives	Carboxylic acids and derivatives	Amino acids, peptides and analogues
L-Serine	1.67612	0.745123	0.00071853	C00065	HMDB0000187	Organic acids and derivatives	Carboxylic acids and derivatives	Amino acids, peptides and analogues
N-Acetylornithine	2.22079	1.15107	0.002552	C00437	HMDB0003357	Organic acids and derivatives	Carboxylic acids and derivatives	Amino acids, peptides and analogues
L-Phenylalanine	7.82797	2.96864	0.0141839	C00079	HMDB0000159	Organic acids and derivatives	Carboxylic acids and derivatives	Amino acids, peptides and analogues
L-Proline	23.9844	4.58402	0.000223496	C00148	HMDB0000162	Organic acids and derivatives	Carboxylic acids and derivatives	Amino acids, peptides and analogues
1-Amino-1-cyclobutanecarboxylic acid	57.5931	5.84782	0.000566714	NONE	NONE	Organic acids and derivatives	Carboxylic acids and derivatives	Amino acids, peptides and analogues
Arabinofuranosyluracil	0.171246	-2.54586	0.0230963	C16745	HMDB0246131	Nucleosides, nucleotides and analogues	Pyrimidine nucleosides	Pyrimidine nucleosides
Guanosine	0.348844	-1.51935	0.00208094	C00387	HMDB0000133	Nucleosides, nucleotides and analogues	Purine nucleosides	Purine nucleosides
Adenine	0.426046	-1.23092	0.00327657	C00147	HMDB0000034	Organoheterocyclic compounds	Imidazopyrimidines	Purines and purine derivatives
Shikimic Acid	0.172379	-2.53634	0.000953399	C00493	HMDB0003070	Organic oxygen compound	Organooxygen compound	Alcohols and polyols
D-(-)-quinic acid	0.371972	-1.42673	0.00012443	C00296	HMDB0003072	Organic oxygen compounds	Organooxygen compounds	Alcohols and polyols
Pantothenic acid	0.845748	-0.2417	0.0346678	C00864	HMDB0000210	Organic oxygen compounds	Organooxygen compounds	Alcohols and polyols
myo-Inositol	1.86877	0.902087	0.0126098	C00137	HMDB0000211	Organic oxygen compound	Organooxygen compound	Alcohols and polyols
D-Pinitol	4.34225	2.11844	2.43963e-09	C03844	HMDB0034219	Organic oxygen compound	Organooxygen compound	Alcohols and polyols
Threonic acid	0.291344	-1.77921	0.000524329	C01620	HMDB0000943	Organic oxygen compound	Organooxygen compound	Carbohydrates and carbohydrate conjugates
D-Saccharic acid	0.308281	-1.69768	0.0174905	C00818	HMDB0000663	Organic oxygen compound	Organooxygen compound	Carbohydrates and carbohydrate conjugates
.beta.-D-Glucopyranosiduronic acid, 5-[3-[(2,2,3,3-tetramethylcyclopropyl)carbonyl]-1H-indol-1-yl]pentyl	0.316879	-1.65799	0.00273205	NONE	NONE	Organic oxygen compound	Organooxygen compound	Carbohydrates and carbohydrate conjugates
D-Glyceric acid	0.367964	-1.44237	0.00274316	C00258	HMDB0000139	Organic oxygen compound	Organooxygen compound	Carbohydrates and carbohydrate conjugates
D-(+)-Trehalose	0.495624	-1.01268	0.0171437	C01083	HMDB0000975	Organic oxygen compound	Organooxygen compound	Carbohydrates and carbohydrate conjugates
Melilotoside	0.509047	-0.974129	0.0014167	C05158	HMDB0033581	Organic oxygen compound	Organooxygen compound	Carbohydrates and carbohydrate conjugates
4-Hydroxy-3-methoxyphenyl .beta.-D-glucopyranoside	1.76588	0.820386	7.13623e-05	NONE	NONE	Organic oxygen compound	Organooxygen compound	CarbohydrateS and carbohydrate conjugates
D-Glucosamine 6-sulfate	2.1906	1.13133	0.0142346	NONE	HMDB0000592	Organic oxygen compound	Organooxygen compound	Carbohydrates and carbohydrate conjugates
D-Lyxose	5.47978	2.45412	0.000576097	C00476	HMDB0003402	Organic oxygen compound	Organooxygen compound	Carbohydrate and carbohydrate conjugates
Sucrose	8.89731	3.15337	0.0023503	C00089	HMDB0000258	Organic oxygen compound	Organooxygen compound	Carbohydrate and carbohydrate conjugates
[5-acetyloxy-3-(hydroxymethyl)-2-oxo-6-propan-2-ylcyclohex-3-en-1-yl] 3-methylpentanoate	0.267365	-1.90312	0.020139	NONE	NONE	Lipids and lipid-like molecules	Prenol lipids	Monoterpenoids
Geranyllinalool	76.7327	6.26177	0.0167818	C20681	NONE	Lipids and lipid-like molecules	Prenol lipids	Diterpenoid
Soyasaponin Bb	0.498655	-1.00389	0.0359049	C08983	HMDB0034649	Lipids and lipid-like molecules	Prenol lipids	Terpene glycosides
NCGC00380213-01_C19H32O8_2-Butanone, 4-[3-(beta-D-glucopyranosyloxy)-4-hydroxy-2,6,6-trimethyl-1-cyclohexen-1-yl]-	5.6844	2.50701	0.000912369	NONE	NONE	Lipids and lipid-like molecules	Prenol lipids	Terpene glycosides
Pinolenic acid	0.293942	-1.7664	0.0468234	NONE	HMDB0340922	Lipids and lipid-like molecules	Fatty acyls	Fatty acids and conjugates
Meglutol	1.51633	0.600585	0.0414318	C03761	HMDB0000355	Lipids and lipid-like molecules	Fatty acyls	Fatty acids and conjugates
2,3-Dihydroxy-2-methylbutanoic acid	1.66718	0.737414	0.00649315	NONE	HMDB0029576	Lipids and lipid-like molecules	Fatty acyls	Fatty acids and conjugates
Geranyl acetate	0.325464	-1.61943	0.00291151	C09861	HMDB0035157	Lipids and lipid-like molecules	Fatty acyls	Fatty alcohol esters
6"-O-Malonylwistin	34.0413	5.08921	0.00373291	NONE	HMDB0039083	Lipids and lipid-like molecules	Steroids and steroid derivatives	Physalins and derivatives
Licoagroside B	0.466631	-1.09965	0.00516153	NONE	HMDB0036523	Lipids and lipid-like molecules	Saccharolipids
MGMG 18:3; PlaSMA ID-1430	0.269969	-1.88913	0.0461118	NONE	NONE	Lipids and lipid-like molecules
1-Palmitoyl-2-linoleoyl-rac-glycerol	1.83408	0.87506	0.00886853	NONE	NONE	Lipids and lipid-like molecules
Benzoylmalic acid	0.396989	-1.33283	0.00034183	NONE	HMDB0039494	Benzenoids	Benzene and substituted derivatives	benzoic acids and derivatives
Benzoic acid	0.414712	-1.26982	0.00173498	C00180	HMDB0001870	Benzenoids	Benzene and substituted derivatives	benzoic acids and derivatives
2,6-Dihydroxybenzoic acid	0.297512	-1.74898	0.0034542	C21298	HMDB0013676	Benzenoids	Benzene and substituted derivatives	Benzoic acids and derivatives
beta-Resorcylic acid	1.52857	0.612185	0.0353249	NONE	HMDB0029666	Benzenoids	Benzene and substituted derivatives	Benzoic acids and derivatives
Gentisic acid 5-O-glucoside	2.06052	1.04301	0.00469034	NONE	NONE	Benzenoids	Phenols
1,2,4-Benzenetriol	5.27358	2.39878	2.38181e-08	C02814	HMDB0124831	Benzenoids	Phenols	Benzenetriols and derivatives
Trigonelline	9.878	3.30422	0.006074	C01004	HMDB0000875	Alkaloids and derivatives
7-Ethyl-10-(4-N-aminopentanoic acid)-1-piperidino)carbonyloxycamptothecin	1.52382	0.607689	0.0270861	NONE	NONE	Alkaloids and derivatives	Camptothecins
p-Coumaric acid	0.544631	-0.87665	0.0225345	C00811	HMDB0002035	Phenylpropanoids and polyketides	Cinnamic acids and derivatives	Hydroxycinnamic acids and derivatives
trans-Ferulic acid	3.16365	1.66159	0.00250876	C01494	HMDB0000954	Phenylpropanoids and polyketides	Cinnamic acids and derivatives	Hydroxycinnamic acids and derivatives
2-Glucosyloxy-4-methoxycinnamic acid	2.04417	1.03151	0.0323509	NONE	NONE	Phenylpropanoids and polyketides	Cinnamic acids and derivatives	Cinnamic acids
3',4',7-Trihydroxyflavanone	0.304945	-1.71338	0.00119917	NONE	HMDB0303585	Phenylpropanoids and polyketides	Flavonoids	Flavans
Aegineoside	0.241247	-2.05142	0.0159242	NONE	NONE	Lignans, neolignans and related compounds
Dehydro-L-(+)-ascorbic acid dimer	0.43748	-1.19271	0.00971279	NONE	NONE	Organoheterocyclic compounds
Dehydroascorbic acid	0.715189	-0.483603	0.0114405	C05422	HMDB0001264	Organoheterocyclic compounds	Lactones	Gamma butyrolactones
2-Hydroxy-2-(2-methoxy-2-oxoethyl)butanedioic acid	2.23289	1.15891	0.0117517	NONE	NONE	Organic acids and derivatives
5-Isoquinolinesulfonic acid	0.358219	-1.48109	0.000477753	NONE	NONE	Unknown
4-(Hexopyranosyloxy)-3-methoxybenzoic acid	2.82374	1.49761	0.00144867	NONE	NONE	Unknown
(R)-3-Amino-3-(3-chlorophenyl)propionic acid	3.03541	1.60189	0.0267782	NONE	NONE	Unknown
.beta.-D-Xylopyranosyl-(1->4)-6-deoxy-.alpha.-L-mannopyranosyl-(1->2)-1-O-((2.beta.,3.beta.,5.Xi.,9.Xi.)-3-(.beta.-D-glucopyranuronosyloxy)-2,24-dihydroxy-24,28-dioxoolean-12-en-28-yl)-.alpha.-L-arabinopyranose	3.89026	1.95987	0.00117322	NONE	NONE	Unknown
