# Supplementary material for: Elucidation of Physiological, Transcriptomic and Metabolomic Salinity Response Mechanisms in Medicago sativa
Source: Plants (Basel). 2023 May 22;12(10):2059. doi: 10.3390/plants12102059 (PMC10221938; doi:10.3390/plants12102059)
Supplement: Supplementary file 1 [file plants-12-02059-s001.zip › plants-2403550-supplementary/Supplemental File 4 Joint pathway matched (Mar 16 2023).xlsx]

## Sheet: jointpa_matched_features (6)
Pathway	Total in pathway	Expected	Hits	Raw p-value	FDR	matched features
Phenylpropanoid biosynthesis	234	5.2396	18	4.6903e-06	0.00061912	cpd:C01494; cpd:C00811; cpd:C05158; cpd:C00079; ath:AT4G05160; ath:AT2G25630; ath:AT3G18070; ath:AT3G47050; ath:AT5G54160; ath:AT3G24503; ath:AT1G05260; ath:AT2G18140; ath:AT3G49960; ath:AT4G21960; ath:AT5G06720; ath:AT5G14130; ath:AT5G51890; ath:AT4G26220
ABC transporters	164	3.6722	13	7.5681e-05	0.0049949	cpd:C01083; cpd:C00049; cpd:C00025; cpd:C00064; cpd:C00188; ath:AT1G10680; ath:AT1G27940; cpd:C00089; cpd:C00148; cpd:C00079; cpd:C00065; cpd:C00137; cpd:C00387
Alanine, aspartate and glutamate metabolism	79	1.7689	8	0.00036673	0.015599	cpd:C00049; ath:AT1G36280; cpd:C00025; ath:AT3G03910; cpd:C00064; ath:AT5G62530; ath:AT2G16570; ath:AT4G34740
Plant-pathogen interaction	175	3.9185	12	0.000548	0.015599	ath:AT5G46330; ath:AT5G20480; ath:AT2G28260; ath:AT3G17690; ath:AT3G17700; ath:AT5G15410; ath:AT3G25070; ath:AT1G80460; ath:AT4G23650; ath:AT3G19690; ath:AT5G52640; ath:AT3G17410
Starch and sucrose metabolism	202	4.5231	13	0.00059365	0.015599	ath:AT2G25630; ath:AT3G18070; ath:AT3G47050; ath:AT4G24260; ath:AT3G43190; ath:AT5G20830; ath:AT1G78580; ath:AT2G21590; ath:AT3G20440; ath:AT4G17090; ath:AT3G29320; cpd:C00089; cpd:C01083
Arginine and proline metabolism	132	2.9557	10	0.00073577	0.015599	ath:AT1G44170; ath:AT2G27450; ath:AT4G29720; ath:AT1G65840; ath:AT2G43020; ath:AT5G14800; ath:AT5G62530; ath:AT2G39800; cpd:C00025; cpd:C00148
MAPK signaling pathway - plant	134	3.0005	10	0.0008272	0.015599	ath:AT5G46330; ath:AT4G26070; ath:AT3G19690; ath:AT3G12500; ath:AT2G40330; ath:AT3G11410; ath:AT1G60940; ath:AT2G23030; ath:AT4G33950; ath:AT4G40010
Circadian rhythm - plant	36	0.80609	5	0.0011468	0.018922	ath:AT2G46790; ath:AT5G24470; ath:AT5G60100; ath:AT1G68050; ath:AT1G04400
Glycerolipid metabolism	99	2.2168	8	0.0016453	0.024131	ath:AT2G01180; ath:AT2G38110; ath:AT1G80460; ath:AT1G44170; ath:AT5G08380; ath:AT3G06510; ath:AT2G20900; cpd:C00258
Arginine biosynthesis	59	1.3211	6	0.0019618	0.025896	cpd:C00049; cpd:C00624; cpd:C00064; ath:AT3G03910; cpd:C00437; cpd:C00025
Plant hormone signal transduction	285	6.3816	14	0.0047662	0.057194	ath:AT2G33860; ath:AT3G16857; ath:AT2G40330; ath:AT3G11410; ath:AT1G60940; ath:AT2G23030; ath:AT4G33950; ath:AT4G40010; ath:AT5G42750; ath:AT4G19660; ath:AT3G19690; ath:AT2G46690; ath:AT3G03820; ath:AT5G18080
Cysteine and methionine metabolism	184	4.12	10	0.0082935	0.085081	cpd:C00065; ath:AT1G64660; ath:AT3G04940; ath:AT5G28020; ath:AT1G55920; ath:AT1G16460; cpd:C00049; ath:AT1G50090; ath:AT5G27380; ath:AT1G17745
beta-Alanine metabolism	79	1.7689	6	0.0083792	0.085081	ath:AT1G44170; cpd:C00049; cpd:C00864; ath:AT1G65840; ath:AT2G43020; ath:AT4G29720
Cyanoamino acid metabolism	114	2.5526	7	0.013925	0.13129	ath:AT2G25630; ath:AT3G18070; ath:AT3G47050; cpd:C00049; cpd:C00065; cpd:C00079; ath:AT4G37550
Amino sugar and nucleotide sugar metabolism	239	5.3516	11	0.018444	0.1623	ath:AT3G12500; ath:AT3G10700; ath:AT2G47650; ath:AT3G53520; ath:AT1G30620; ath:AT1G01220; ath:AT1G02000; ath:AT4G30440; ath:AT2G21590; ath:AT1G18580; ath:AT3G25140
Sulfur metabolism	75	1.6794	5	0.026114	0.21544	ath:AT1G16460; ath:AT3G04940; ath:AT5G28020; ath:AT1G55920; cpd:C00065
Phosphatidylinositol signaling system	105	2.3511	6	0.030228	0.2277	ath:AT3G50110; cpd:C00137; ath:AT1G10900; ath:AT1G21980; ath:AT1G34260; ath:AT2G20900
Purine metabolism	195	4.3663	9	0.03105	0.2277	ath:AT2G16570; ath:AT4G34740; ath:AT1G36280; ath:AT3G04080; ath:AT1G71750; ath:AT5G08570; cpd:C00064; cpd:C00147; cpd:C00387
Aminoacyl-tRNA biosynthesis	167	3.7394	8	0.033878	0.23537	ath:AT3G11710; cpd:C00188; cpd:C00065; cpd:C00049; cpd:C00148; cpd:C00025; cpd:C00064; cpd:C00079
Glyoxylate and dicarboxylate metabolism	140	3.1348	7	0.037633	0.24838	ath:AT4G37550; ath:AT5G47760; cpd:C00258; cpd:C00065; ath:AT3G16950; cpd:C00025; cpd:C00064
Peroxisome	87	1.9481	5	0.045244	0.27055	ath:AT5G48880; ath:AT1G64400; ath:AT3G23790; ath:AT4G23850; ath:AT3G24570
Glycolysis or Gluconeogenesis	147	3.2915	7	0.046927	0.27055	ath:AT2G36460; ath:AT1G44170; ath:AT5G08570; ath:AT1G16300; ath:AT4G23730; ath:AT3G01260; ath:AT3G16950
Nitrogen metabolism	62	1.3883	4	0.049748	0.27055	ath:AT4G37550; cpd:C00064; cpd:C00025; ath:AT3G03910
Glycine, serine and threonine metabolism	120	2.687	6	0.052366	0.27055	ath:AT1G17745; ath:AT3G16950; cpd:C00258; cpd:C00049; cpd:C00188; cpd:C00065
Phenylalanine, tyrosine and tryptophan biosynthesis	91	2.0376	5	0.053085	0.27055	ath:AT2G29690; ath:AT5G10870; cpd:C00296; cpd:C00493; cpd:C00079
Carbon fixation in photosynthetic organisms	92	2.06	5	0.055162	0.27055	ath:AT2G36460; ath:AT1G71100; cpd:C00049; ath:AT1G16300; ath:AT2G19900
Valine, leucine and isoleucine degradation	93	2.0824	5	0.057284	0.27055	ath:AT1G21400; ath:AT3G16950; ath:AT1G50090; ath:AT5G48880; ath:AT1G44170
Histidine metabolism	65	1.4554	4	0.057389	0.27055	ath:AT1G44170; cpd:C00049; cpd:C00025; ath:AT1G43710
Fatty acid degradation	97	2.172	5	0.06624	0.30151	ath:AT5G48880; ath:AT1G64400; ath:AT3G23790; ath:AT4G23850; ath:AT1G44170
Ascorbate and aldarate metabolism	102	2.2839	5	0.078472	0.34514	cpd:C00137; ath:AT1G44170; cpd:C00818; cpd:C01620; cpd:C05422
Galactose metabolism	103	2.3063	5	0.081055	0.34514	ath:AT5G08380; ath:AT3G57520; cpd:C00137; cpd:C00089; ath:AT3G01260
Biosynthesis of secondary metabolites - unclassified	81	1.8137	4	0.10782	0.44126	cpd:C00065; cpd:C00811; ath:AT4G05160; ath:AT4G26220
Sphingolipid metabolism	52	1.1644	3	0.11031	0.44126	ath:AT5G51290; ath:AT5G08380; cpd:C00065
Monobactam biosynthesis	53	1.1867	3	0.11511	0.44689	cpd:C00065; cpd:C00188; cpd:C00049
Endocytosis	150	3.3587	6	0.1202	0.45334	ath:AT4G35790; ath:AT1G10900; ath:AT1G21980; ath:AT5G19610; ath:AT3G20290; ath:AT4G05520
Pantothenate and CoA biosynthesis	56	1.2539	3	0.12994	0.47645	cpd:C00864; ath:AT1G50090; cpd:C00049
Inositol phosphate metabolism	124	2.7765	5	0.14517	0.51789	ath:AT3G50110; ath:AT1G10900; ath:AT1G21980; ath:AT1G34260; cpd:C00137
Homologous recombination	67	1.5002	3	0.18926	0.64406	ath:AT5G64520; ath:AT1G05490; ath:AT3G19210
Fatty acid biosynthesis	101	2.2615	4	0.19029	0.64406	ath:AT5G46290; ath:AT1G64400; ath:AT3G23790; ath:AT4G23850
Glutathione metabolism	140	3.1348	5	0.20488	0.6761	ath:AT4G11600; ath:AT5G27380; ath:AT1G10360; cpd:C00025; cpd:C05422
Zeatin biosynthesis	71	1.5898	3	0.21233	0.68168	cpd:C00147; ath:AT2G36750; ath:AT3G53160
Ubiquitin mediated proteolysis	143	3.202	5	0.2169	0.68168	ath:AT4G36410; ath:AT1G20140; ath:AT5G25560; ath:AT3G58040; ath:AT3G61790
Glycerophospholipid metabolism	148	3.3139	5	0.2374	0.72876	ath:AT1G71697; ath:AT2G20900; ath:AT2G01180; ath:AT4G35790; ath:AT2G38110
Base excision repair	43	0.96283	2	0.25034	0.73434	ath:AT3G51880; ath:AT3G12710
Vitamin B6 metabolism	43	0.96283	2	0.25034	0.73434	ath:AT5G60540; ath:AT1G17710
Pyruvate metabolism	117	2.6198	4	0.26676	0.75	ath:AT5G08570; ath:AT2G19900; ath:AT1G44170; ath:AT3G16950
Valine, leucine and isoleucine biosynthesis	45	1.0076	2	0.26704	0.75	cpd:C00188; ath:AT1G50090
Biosynthesis of secondary metabolites - other antibiotics	82	1.8361	3	0.27831	0.76535	cpd:C00065; cpd:C00025; cpd:C00079
alpha-Linolenic acid metabolism	88	1.9704	3	0.31515	0.84897	ath:AT5G48880; ath:AT1G19640; ath:AT3G03480
Pentose phosphate pathway	93	2.0824	3	0.34594	0.91329	ath:AT1G71100; ath:AT2G36460; cpd:C00258
Sulfur relay system	24	0.53739	1	0.41971	1	ath:AT1G16460
Vancomycin resistance	25	0.55979	1	0.43274	1	cpd:C00065
Nicotinate and nicotinamide metabolism	73	1.6346	2	0.48928	1	cpd:C00049; cpd:C01004
Fructose and mannose metabolism	118	2.6422	3	0.49497	1	ath:AT5G66460; ath:AT2G36460; ath:AT1G01220
Stilbenoid, diarylheptanoid and gingerol biosynthesis	32	0.71653	1	0.51614	1	ath:AT4G26220
Glycosphingolipid biosynthesis - globo and isoglobo series	32	0.71653	1	0.51614	1	ath:AT5G08380
Pyrimidine metabolism	122	2.7318	3	0.51735	1	cpd:C00064; ath:AT3G04080; ath:AT2G19570
Taurine and hypotaurine metabolism	36	0.80609	1	0.5582	1	cpd:C00025
N-Glycan biosynthesis	83	1.8585	2	0.55832	1	ath:AT1G12990; ath:AT3G01620
Phagosome	83	1.8585	2	0.55832	1	ath:AT5G23860; ath:AT1G34260
Citrate cycle (TCA cycle)	83	1.8585	2	0.55832	1	ath:AT3G16950; ath:AT4G35650
Linoleic acid metabolism	37	0.82848	1	0.56813	1	ath:AT3G22400
Brassinosteroid biosynthesis	37	0.82848	1	0.56813	1	ath:AT5G05690
Riboflavin metabolism	38	0.85088	1	0.57784	1	ath:AT4G21470
C5-Branched dibasic acid metabolism	41	0.91805	1	0.60569	1	cpd:C00025
Propanoate metabolism	91	2.0376	2	0.60862	1	ath:AT3G16950; ath:AT1G21400
Lysine degradation	92	2.06	2	0.61459	1	ath:AT3G16950; ath:AT1G44170
Carotenoid biosynthesis	144	3.2244	3	0.6301	1	ath:AT2G29090; ath:AT4G19230; ath:AT1G52340
Biotin metabolism	44	0.98522	1	0.63171	1	ath:AT5G46290
RNA polymerase	45	1.0076	1	0.64	1	ath:AT3G13940
Selenocompound metabolism	45	1.0076	1	0.64	1	ath:AT1G64660
Porphyrin and chlorophyll metabolism	195	4.3663	4	0.64006	1	cpd:C00025; ath:AT5G43860; ath:AT1G58300; cpd:C00188
Pentose and glucuronate interconversions	151	3.3811	3	0.66195	1	ath:AT3G15720; ath:AT1G02810; ath:AT3G29090
DNA replication	50	1.1196	1	0.67874	1	ath:AT1G44900
Lysine biosynthesis	50	1.1196	1	0.67874	1	cpd:C00049
Ether lipid metabolism	51	1.142	1	0.68597	1	ath:AT4G35790
Protein export	54	1.2091	1	0.70672	1	ath:AT1G06870
Cutin, suberine and wax biosynthesis	58	1.2987	1	0.73227	1	ath:AT1G02190
Butanoate metabolism	62	1.3883	1	0.75561	1	cpd:C00025
Ubiquinone and other terpenoid-quinone biosynthesis	130	2.9109	2	0.79279	1	cpd:C00811; ath:AT4G05160
Limonene and pinene degradation	70	1.5674	1	0.79639	1	ath:AT1G44170
Glucosinolate biosynthesis	77	1.7241	1	0.82647	1	cpd:C00079
Tryptophan metabolism	142	3.1796	2	0.83169	1	ath:AT3G16950; ath:AT1G44170
Folate biosynthesis	83	1.8585	1	0.84871	1	ath:AT3G55630
Protein processing in endoplasmic reticulum	217	4.8589	3	0.86912	1	ath:AT1G20140; ath:AT5G52640; ath:AT5G42570
Arachidonic acid metabolism	92	2.06	1	0.87686	1	ath:AT4G11600
Phenylalanine metabolism	92	2.06	1	0.87686	1	cpd:C00079
Steroid biosynthesis	93	2.0824	1	0.87964	1	ath:AT3G19820
Flavonoid biosynthesis	96	2.1496	1	0.88763	1	ath:AT4G26220
Tropane, piperidine and pyridine alkaloid biosynthesis	103	2.3063	1	0.90428	1	cpd:C00079
RNA transport	174	3.8961	2	0.90533	1	ath:AT1G07920; ath:AT5G54940
Oxidative phosphorylation	176	3.9409	2	0.90875	1	ath:AT1G01050; ath:AT2G18230
Tyrosine metabolism	118	2.6422	1	0.93214	1	cpd:C00811
Spliceosome	192	4.2992	2	0.93227	1	ath:AT3G44785; ath:AT1G09140
Isoquinoline alkaloid biosynthesis	144	3.2244	1	0.96268	1	cpd:C00811
